# Supplementary material for: Feasibility of comparing medical management and surgery (with neurosurgery or stereotactic radiosurgery) with medical management alone in people with symptomatic brain cavernoma – protocol for the Cavernomas: A Randomised Effectiveness (CARE) pilot trial
Source: PubMed Central journal article supplement (PMC10414059; doi:10.1136/bmjopen-2023-075187), 2023-08-09
Supplement: bmjopen-2023-075187.draft_revisions.pdf [file bmjopen-2023-075187.draft_revisions.pdf]

# BMJ Open

BMJ Open is committed to open peer review. As part of this commitment we make the peer review history of every article we publish publicly available.

When an article is published we post the peer reviewers' comments and the authors' responses online. We also post the versions of the paper that were used during peer review. These are the versions that the peer review comments apply to.

The versions of the paper that follow are the versions that were submitted during the peer review process. They are not the versions of record or the final published versions. They should not be cited or distributed as the published version of this manuscript.

BMJ Open is an open access journal and the full, final, typeset and author-corrected version of record of the manuscript is available on our site with no access controls, subscription charges or pay-per-view fees (<http://bmjopen.bmj.com>).

If you have any questions on BMJ Open's open peer review process please email [info.bmjopen@bmj.com](mailto:info.bmjopen@bmj.com)

# BMJ Open

## **Cavernomas A Randomised Effectiveness (CARE) pilot trial, to address the effectiveness of active treatment (with neurosurgery or stereotactic radiosurgery) versus conservative management in people with symptomatic brain cavernoma: Study protocol**

|                               |                                                                                                                                                                                                                                                                                                                                                                                                                                                                                                                                                                                                                                                                                                                                                                                                                                                                                                                                                                                                                                                                                                                                                                                                                                                                                                                                                                                                                                                                                                                                                                                                                                                                                                                                                                                                                                                                                                                                                                                                                                                                                                                                              |
|-------------------------------|----------------------------------------------------------------------------------------------------------------------------------------------------------------------------------------------------------------------------------------------------------------------------------------------------------------------------------------------------------------------------------------------------------------------------------------------------------------------------------------------------------------------------------------------------------------------------------------------------------------------------------------------------------------------------------------------------------------------------------------------------------------------------------------------------------------------------------------------------------------------------------------------------------------------------------------------------------------------------------------------------------------------------------------------------------------------------------------------------------------------------------------------------------------------------------------------------------------------------------------------------------------------------------------------------------------------------------------------------------------------------------------------------------------------------------------------------------------------------------------------------------------------------------------------------------------------------------------------------------------------------------------------------------------------------------------------------------------------------------------------------------------------------------------------------------------------------------------------------------------------------------------------------------------------------------------------------------------------------------------------------------------------------------------------------------------------------------------------------------------------------------------------|
| Journal:                      | <i>BMJ Open</i>                                                                                                                                                                                                                                                                                                                                                                                                                                                                                                                                                                                                                                                                                                                                                                                                                                                                                                                                                                                                                                                                                                                                                                                                                                                                                                                                                                                                                                                                                                                                                                                                                                                                                                                                                                                                                                                                                                                                                                                                                                                                                                                              |
| Manuscript ID                 | bmjopen-2023-075187                                                                                                                                                                                                                                                                                                                                                                                                                                                                                                                                                                                                                                                                                                                                                                                                                                                                                                                                                                                                                                                                                                                                                                                                                                                                                                                                                                                                                                                                                                                                                                                                                                                                                                                                                                                                                                                                                                                                                                                                                                                                                                                          |
| Article Type:                 | Protocol                                                                                                                                                                                                                                                                                                                                                                                                                                                                                                                                                                                                                                                                                                                                                                                                                                                                                                                                                                                                                                                                                                                                                                                                                                                                                                                                                                                                                                                                                                                                                                                                                                                                                                                                                                                                                                                                                                                                                                                                                                                                                                                                     |
| Date Submitted by the Author: | 28-Apr-2023                                                                                                                                                                                                                                                                                                                                                                                                                                                                                                                                                                                                                                                                                                                                                                                                                                                                                                                                                                                                                                                                                                                                                                                                                                                                                                                                                                                                                                                                                                                                                                                                                                                                                                                                                                                                                                                                                                                                                                                                                                                                                                                                  |
| Complete List of Authors:     | <p>Loan, James; The University of Edinburgh Centre for Clinical Brain Sciences, Chancellor's Building; Royal Infirmary of Edinburgh, Department of Clinical Neurosciences</p> <p>Bacon, Andrew; Sheffield Teaching Hospitals NHS Foundation Trust van Beijnum, Janneke; University Hospital of Wales, Neurosurgery</p> <p>Bhatt, Pragnesh; Aberdeen Royal Infirmary</p> <p>Bjornson, Anna; Hull Royal Infirmary</p> <p>Broomes, Nicole; University Hospital Southampton NHS Foundation Trust Wessex Neurological Centre</p> <p>Bullen, Alistair; The University of Edinburgh Usher Institute of Population Health Sciences and Informatics, Edinburgh Clinical Trials Unit</p> <p>Bulters, Diederik; University Hospital Southampton NHS Foundation Trust Wessex Neurological Centre</p> <p>Cahill, Julian; Royal Hallamshire Hospital, National Centre for Stereotactic Radiosurgery</p> <p>Chavredakis, Emmanuel; Walton Centre for Neurology and Neurosurgery</p> <p>Colombo, Francesca; Royal Preston Hospital</p> <p>Danciut, Mihai; Hull Royal Infirmary</p> <p>Digpal, Ronneil; University Hospital Southampton NHS Foundation Trust Wessex Neurological Centre</p> <p>Edwards, Richard; Bristol Royal Hospital for Children</p> <p>Ferguson, Lucie; James Cook University Hospital</p> <p>Forsyth, Laura; The University of Edinburgh Usher Institute of Population Health Sciences and Informatics, Edinburgh Clinical Trials Unit</p> <p>Fouyas, Ioannis; Royal Infirmary of Edinburgh, Department of Clinical Neurosciences</p> <p>Ganesan, Vijeya; Great Ormond Street Hospital for Children, Developmental Neurosciences Department</p> <p>Grover, Patrick; University College London Hospitals NHS Foundation Trust</p> <p>Gurusinghe, Nihal; Lancashire Teaching Hospitals NHS Foundation Trust, Department of Neurosurgery</p> <p>Hall, Peter; Institute of Genetics and Cancer, University of Edinburgh</p> <p>Harkness, Kirsty; Royal Hallamshire Hospital</p> <p>Harris, Lauren S; Queen's Hospital</p> <p>Hayton, Tom; Queen Elizabeth Hospital</p> <p>Helmy, Adel; University of Cambridge, Clinical Neurosciences;</p> |

|           |                                                                                                                                                                                                                                                                                                                                                                                                                                                                                                                                                                                                                                                                                                                                                                                                                                                                                                                                                                                                                                                                                                                                                                                                                                                                                                                                                                                                                                                                                                                                                                                                                                                                                                                                                                                                                                                                                                                                                                                                                                                                                                                                                                                                                                                                                                                                                                                                                                                                                                                          |
|-----------|--------------------------------------------------------------------------------------------------------------------------------------------------------------------------------------------------------------------------------------------------------------------------------------------------------------------------------------------------------------------------------------------------------------------------------------------------------------------------------------------------------------------------------------------------------------------------------------------------------------------------------------------------------------------------------------------------------------------------------------------------------------------------------------------------------------------------------------------------------------------------------------------------------------------------------------------------------------------------------------------------------------------------------------------------------------------------------------------------------------------------------------------------------------------------------------------------------------------------------------------------------------------------------------------------------------------------------------------------------------------------------------------------------------------------------------------------------------------------------------------------------------------------------------------------------------------------------------------------------------------------------------------------------------------------------------------------------------------------------------------------------------------------------------------------------------------------------------------------------------------------------------------------------------------------------------------------------------------------------------------------------------------------------------------------------------------------------------------------------------------------------------------------------------------------------------------------------------------------------------------------------------------------------------------------------------------------------------------------------------------------------------------------------------------------------------------------------------------------------------------------------------------------|
|           | <p>Addenbrooke's Hospital,<br/>Holsgrove, Daniel; Salford Royal Hospital Manchester Centre for Clinical Neurosciences<br/>Hutchinson, Peter; University of Cambridge, Academic Neurosurgery;<br/>Addenbrooke's Hospital,<br/>Israni, Anil; Alder Hey Children's Hospital<br/>Kinsella, Elaine; The University of Edinburgh Usher Institute of Population Health Sciences and Informatics, Edinburgh Clinical Trials Unit<br/>Lewis, Steff; The University of Edinburgh Usher Institute of Population Health Sciences and Informatics, Edinburgh Clinical Trials Unit<br/>Majeed, Sohail ; Aberdeen Royal Infirmary, Aberdeen, UK<br/>Mallucci, Conor; Alder Hey Children's Hospital<br/>Mukerji, Nitin; James Cook University Hospital<br/>Nair, Ramesh; Charing Cross Hospital<br/>Neilson, Aileen; The University of Edinburgh Usher Institute of Population Health Sciences and Informatics, Edinburgh Clinical Trials Unit<br/>Papadopoulos, Marios; St George's Hospital, Department of Neurosurgery<br/>Radatz, Matthias; Royal Hallamshire Hospital, National Centre for Stereotactic Radiosurgery<br/>Rosseutsch, Alex; Royal Hallamshire Hospital<br/>Raza-Knight, Saba; Royal Preston Hospital<br/>Stephen, J; The University of Edinburgh Usher Institute of Population Health Sciences and Informatics, Edinburgh Clinical Trials Unit<br/>Stoddart, Andrew; The University of Edinburgh Usher Institute of Population Health Sciences and Informatics, Edinburgh Clinical Trials Unit<br/>Teo, Mario; North Bristol NHS Trust, Department of Neurosurgery<br/>Turner, Carole; University of Cambridge, Clinical Neurosciences;<br/>Addenbrooke's Hospital,<br/>Wade, Julia; University of Bristol, Bristol Medical School<br/>Walsh, Daniel; King's College Hospital; King's College London Institute of Psychiatry Psychology &amp; Neuroscience<br/>White, David; Cavernoma Alliance UK<br/>White, Phil ; Newcastle University Translational and Clinical Research Institute<br/>Wildman, Jack; Southmead Hospital<br/>Wroe Wright, Oliver; King's College Hospital<br/>Uff, Christopher; The Royal London Hospital<br/>Ushewokunze, Shungu; Sheffield Children's Hospital NHS Foundation Trust<br/>Vindlacheruvu, Raghu; Queen's Hospital<br/>Kitchen, Neil; National Hospital for Neurology and Neurosurgery<br/>Al-Shahi Salman, Rustam; The University of Edinburgh Centre for Clinical Brain Sciences, Chancellor's Building; Royal Infirmary of Edinburgh, Department of Clinical Neurosciences</p> |
| Keywords: | Neurosurgery < SURGERY, Stroke < NEUROLOGY, NEUROSURGERY, Paediatric neurology < NEUROLOGY, Adult neurology < NEUROLOGY, Clinical Trial                                                                                                                                                                                                                                                                                                                                                                                                                                                                                                                                                                                                                                                                                                                                                                                                                                                                                                                                                                                                                                                                                                                                                                                                                                                                                                                                                                                                                                                                                                                                                                                                                                                                                                                                                                                                                                                                                                                                                                                                                                                                                                                                                                                                                                                                                                                                                                                  |
|           |                                                                                                                                                                                                                                                                                                                                                                                                                                                                                                                                                                                                                                                                                                                                                                                                                                                                                                                                                                                                                                                                                                                                                                                                                                                                                                                                                                                                                                                                                                                                                                                                                                                                                                                                                                                                                                                                                                                                                                                                                                                                                                                                                                                                                                                                                                                                                                                                                                                                                                                          |

SCHOLARONE™  
Manuscripts

**TITLE:**

Cavernomas A Randomised Effectiveness (CARE) pilot trial, to address the effectiveness of active treatment (with neurosurgery or stereotactic radiosurgery) versus conservative management in people with symptomatic brain cavernoma: Study protocol

**Protocol version:**

Published summary of V2.0 (22 March 2021)

**Authors:**

James JM. Loan,<sup>1,2</sup> Andrew Bacon,<sup>3</sup> Janneke van Beijnum,<sup>4</sup> Pragnesh Bhatt,<sup>5</sup> Anna Bjornson,<sup>6</sup> Nicole Broomes,<sup>7</sup> Alistair Bullen,<sup>8</sup> Diederik Bulters,<sup>7</sup> Julian Cahill,<sup>3,22</sup> Emmanuel Chavredakis,<sup>9</sup> Francesca Colombo,<sup>10</sup> Mihai Danciu,<sup>6</sup> Ronneil Digpal,<sup>7</sup> Richard J. Edwards,<sup>11</sup> Lucie Ferguson,<sup>12</sup> Laura Forsyth,<sup>8</sup> Ioannis Fouyas,<sup>2</sup> Vijeya Ganesan,<sup>13</sup> Patrick Grover,<sup>14</sup> Nihal Gurusinghe,<sup>10</sup> Peter S. Hall,<sup>15</sup> Kirsty Harkness,<sup>3</sup> Lauren Harris,<sup>16</sup> Tom Hayton,<sup>17</sup> Adel Helmy,<sup>18,19</sup> Daniel Holsgrove,<sup>20</sup> Peter Hutchinson,<sup>18,19</sup> Anil Israni,<sup>21</sup> Elaine Kinsella,<sup>8</sup> Steff Lewis,<sup>8</sup> Sohail Majeed,<sup>5</sup> Conor Mallucci,<sup>21</sup> Nitin Mukerji,<sup>12</sup> Ramesh Nair,<sup>22</sup> Aileen Rae Neilson,<sup>8</sup> Marios C. Papadopoulos,<sup>23</sup> Matthias Radatz,<sup>24</sup> Alex Rossedeutsch,<sup>3</sup> Saba Raza-Knight,<sup>10</sup> Jacqueline Stephen,<sup>8</sup> Andy Stoddart,<sup>8</sup> Mario Teo,<sup>25</sup> Carole Turner,<sup>18,19</sup> Julia Wade,<sup>26</sup> Daniel Walsh,<sup>27,28</sup> David White,<sup>29</sup> Phil White,<sup>30</sup> Jack Wildman,<sup>25</sup> Oliver Wroe Wright,<sup>27</sup> Christopher Uff,<sup>31</sup> Shungu Ushewokunze,<sup>32</sup> Raghu Vindlacheruvu,<sup>16</sup> Neil Kitchen,<sup>14</sup> Rustam Al-Shahi Salman.<sup>1,2</sup> On behalf of the Cavernomas A randomised Effectiveness (CARE) pilot trial collaborators<sup>†</sup>

<sup>†</sup>Listed at end of manuscript

\*Authors contributed equally

**Keywords:**

Cavernous Malformation, Cavernoma, Randomised controlled trial, Neurosurgery, Stereotactic radiosurgery, Protocol

**Registration:** ISRCTN registration number 41647111

**Correspondence to:**

Professor Rustam Al-Shahi Salman

Centre for Clinical Brain Sciences, University of Edinburgh, Chancellor's Building, 49 Little France Crescent, Edinburgh BioQuarter, Edinburgh, EH16 4SB, UK. [Rustam.Al-Shahi@ed.ac.uk](mailto:Rustam.Al-Shahi@ed.ac.uk)

**Trial sponsor:**

1  
2  
3 35 Academic and Clinical Central Office for Research and Development (ACCORD) Edinburgh  
4 36 Research & Development Management Suite, The Queen's Medical Research Institute, 47  
5 37 Little France Crescent, Edinburgh, EH16 4TJ, UK. enquiries@accord.scot  
6  
7  
8 38

9 39 **Affiliations**

- 10  
11 40 1. Centre for Clinical Brain Sciences, University of Edinburgh, Edinburgh, UK  
12  
13 41 2. Department of Clinical Neurosciences, NHS Lothian, Edinburgh, UK.  
14  
15 42 3. Royal Hallamshire Hospital, Sheffield, UK  
16  
17 43 4. University Hospital of Wales, Cardiff, UK  
18  
19 44 5. Aberdeen Royal Infirmary, Aberdeen, UK  
20  
21 45 6. Hull Royal Infirmary, Hull, UK  
22  
23 46 7. Wessex Neurological Centre, Southampton, UK  
24  
25 47 8. Edinburgh Clinical Trials Unit, Usher Institute, University of Edinburgh, Edinburgh, UK  
26  
27 48 9. The Walton Centre, Liverpool, UK  
28  
29 49 10. Royal Preston Hospital, Preston, UK  
30  
31 50 11. Bristol Royal Hospital for Children, Bristol, UK  
32  
33 51 12. James Cook University Hospital, Middlesbrough  
34  
35 52 13. Developmental Neurosciences Department, Great Ormond Street Institute of Child  
36  
37 53 Health, University College London, London, UK  
38  
39 54 14. The National Hospital for Neurology & Neurosurgery, London, UK  
40  
41 55 15. Institute of Genetics and Cancer, University of Edinburgh, Edinburgh, UK  
42  
43 56 16. Queen's Hospital, Romford, London, UK  
44  
45 57 17. Queen Elizabeth Hospital, Birmingham, UK  
46  
47 58 18. Addenbrookes Hospital, Cambridge, UK  
48  
49 59 19. Department of Clinical Neurosciences, University of Cambridge, Cambridge, UK  
50  
51 60 20. Salford Royal Hospital, Manchester, UK  
52  
53 61 21. Alder Hey Hospital, Liverpool, UK  
54  
55 62 22. Charing Cross Hospital, London, UK  
56  
57 63 23. Department of Neurosurgery, Atkinson Morley Wing, St. George's Hospital, London,  
58  
59 64 UK  
60  
61 65 24. National Centre for Stereotactic Radiosurgery, Royal Hallamshire Hospital, Sheffield,  
62  
63 66 UK  
64  
65 67 25. Southmead Hospital, Bristol, UK  
66  
67 68 26. Population Health Science, Bristol Medical School, University of Bristol, Bristol, UK  
68  
69 69 27. King's College Hospital, London, UK  
70  
71 70 28. Institute of Psychiatry, Psychology and Neuroscience, King's College London, London  
72  
73 71 UK

- 1  
2  
3 72 29. Cavernoma Alliance UK, Watlington, UK  
4  
5 73 30. Translational and Clinical Research Institute, Newcastle University and Newcastle  
6 upon Tyne NHS Foundation Trust, Newcastle upon Tyne, UK  
7  
8 75 31. Royal London Hospital, London, UK  
9  
10 76 32. Sheffield Children's Hospital, Sheffield, UK

11  
12 77 **Number of words in abstract:** 266/300

13  
14 78 **Word Count:** 4000/4000

15  
16 79 **Number of references:** 27

17  
18 80 **Number of figures:** 1

19  
20 81 **Number of tables:** 1

21  
22 82 **Number of supplementary files:** 6  
23  
24  
25

#### 26 84 **CARE COLLABORATORS**

27  
28 85 Royal Infirmary Edinburgh - Ioannis Fouyas, Allan MacRaid, Jessica Teasdale,Michelle  
29  
30 86 Coakley, James Loan, Rustam Al-Shahi Salman, Paul Brennan, Drahoslav Sokol, Anthony  
31  
32 87 Wiggins, Chandru Kaliaperumal, Mairi MacDonald and Sarah Risbridger; St.George's Hospital  
33  
34 88 - Marios Papadopoulos, Siobhan Kearney, Ravindran Visagan, Ellaine Bosetta and Hasan  
35  
36 89 Asif; Great Ormond Street Hospital - Greg James, Aswin Chari, Vijeya Ganesan, Martin  
37  
38 90 Tisdall, Christin Eltze, Zubair Tahir and Sanjay Bhate; National Hospital Neurology and  
39  
40 91 Neurosurgery - Patrick Grover, Azra Banaras, Sifelani Tshuma, Neil Kitchen, William  
41  
42 92 Muirhead, Ciaran Scott Hill, Rupal Shah, Thomas Doke, Rebecca Hall and Sonny Coskuner;  
43  
44 93 Royal Hallamshire Hospital - Andrew Bacon, Kirsty Harkness, Emma Richards, Jo Howe,  
45  
46 94 Christine Kamara, Jonathan Gardner, Madalina Roman, Mary Sikaonga, Matthias Radatz,  
47  
48 95 Julian Cahill, Alex Rossdeutsch, Varduhi Cahill, Imron Hamina, Kishor Chaudhari;  
49  
50 96 Addenbrooke's Hospital - Adel Helmy, Liliana Chapas, Silvia Tarantino, Karen Caldwell,  
51  
52 97 Mathew Guilfoyle, Smriti Agarwal, Daniel Brown, Sarah Holland and Tamara Tajsic; Alder Hey  
53  
54 98 Hospital - Conor Mallucci, Anil Israni, Rachael Dore, Taya Anderson, Dawn Hennigan, Shelley  
55  
56 99 Mayor, Laura O'Malley and Samantha Glover; Aberdeen Royal Infirmary - Pragnesh Bhatt,  
57  
58 100 Janice Irvine, Sohail Majeed, Sandra Williams, John Reid, Annika Walch, Farah Muir and Eng

- 1  
2  
3 101 Tah Goh; Queen Elizabeth Hospital, Birmingham - Tom Hayton, Arlo Whitehouse, Andrew  
4  
5 102 McDarby, Michelle Bates, Rebecca Hancox, Edward White and Claudia Kate Auyeung;  
6  
7 103 Birmingham Children's Hospital - William B Lo and Julie Woodfield; Southmead Hospital -  
8  
9 104 Mario Teo, Jack Wildman, Kerry Smith, Elizabeth Goff, Deanna Stephens, Borislava  
10  
11 105 Borislavova, Ruth Worner, Sandeep Buddha and Philip Clatworthy; Bristol Royal Hospital for  
12  
13 106 Children - Richard Edwards, Karen Coy, Lisa Tucker, Sandra Dymond, Andrew Mallick,  
14  
15 107 Rebecca Hodnett and Francesca Spickett-Jones; University Hospital Wales - Janneke van  
16  
17 108 Beijnum, Paul Leach, Tom Hughes, Milan Makwana, Khalid Hamandi, Dymona McAleer and  
18  
19 109 Belinda Gunning; Hull Royal Infirmary - Mihai Danciu, Emma Clarkson and Anna Bjornson;  
20  
21 110 Walton Centre - Emmanuel Chavredakis, Debbie Brown, Giannis Sokratous, John Williamson,  
22  
23 111 Cathy Stoneley, Andrew Brodbelt, Jibril Osman Farah and Sarah Illingworth; Charing Cross  
24  
25 112 Hospital, London - Ramesh Nair, Sophie Hunter, Niamh Bohnacker, Rosette Marimon, Lydia  
26  
27 113 Parker, Oishik Raha and Puneet Sharma; King's College Hospital, London - Daniel Walsh,  
28  
29 114 Oliver Wroe Wright and Sabina Patel; Salford Royal Hospital - Dan Holsgrove, Danielle  
30  
31 115 McLaughlan, Tracey Marsden, Francesca Colombo, Kathryn Cawley, Hellen Raffalli and Saba  
32  
33 116 Raza-Knight; Manchester Children's Hospital - Ian Kamaly-Asl, Felicia Jennings, Nicola  
34  
35 117 Phillips, Imedla Mayor, James Stewart, Dipek Ram, Rebecca Keeping, Grace Vassallo and  
36  
37 118 Katie Hennessy; James Cook University Hospital - Nitin Mukerji, Emanuel Cirstea, Susan  
38  
39 119 Davies, Venetia Giannakaki, Ammar Kadhim, Oliver Kennion, Md Moidul Islam, Lucie  
40  
41 120 Ferguson and Manjunath Prasad; Royal Victoria Infirmary, Newcastle - Nicholas Ross, Beth  
42  
43 121 Atkinson, Cheryl Webster, Michelle Fawcett, Vicky Slater and Saffnan Mohamed; Royal  
44  
45 122 Preston Hospital - Nihal Gurusinghe, Saba Raza Knight, Terri-Louise Cromie, Allan Brown,  
46  
47 123 Sonia Raj, Ruth Pennington, Charlene Campbell, Shakeelah Patel and Francesca Colombo;  
48  
49 124 Queen's Hospital, Romford - Raghu Vindlacheruvu, Anthony Ghosh, Teresa Fitzpatrick and  
50  
51 125 Lauren Harris; Sheffield Children's Hospital - Shungu Ushewokunze, Sarah Ali, John Preston,  
52  
53 126 Carole Chambers and Mohammed Patel; Southampton General Hospital - Diederik Bulters,  
54  
55 127 Ronneil Diggpal, Winnington Ruiz, Mirriam Taylor, Divina Anyog, Katarzyna Tluchowska,  
56  
57 128 Jackson Nolasco, Daniel Brooks, Kleopatra Angelopoulou, Bethany Welch and Nicole

- 1  
2  
3 129 Broomes; Royal Stoke Hospital - Howard Brydon, Ida Ponce, Louis Taylor, Lucy Bailey, Mia  
4  
5 130 Marsden, Claire Hudson, Angelene Cope, Jack Lee, Deepthy Blesson and Rachel Sutton;  
6  
7 131 Leeds General Infirmary – Ian Anderson, Mary Kambafwile, Linetty Makawa, Jade McAndrew  
8  
9 132 and Atul Tyagi. Royal London Hospital - Christopher Uff and Geetha Boyapati.  
10  
11  
12  
13  
14  
15  
16  
17  
18  
19  
20  
21  
22  
23  
24  
25  
26  
27  
28  
29  
30  
31  
32  
33  
34  
35  
36  
37  
38  
39  
40  
41  
42  
43  
44  
45  
46  
47  
48  
49  
50  
51  
52  
53  
54  
55  
56  
57  
58  
59  
60

For peer review only



1  
2  
3 133 **ABSTRACT**

4 134 **Introduction:** The top research priority for cavernoma, identified by a James Lind Alliance  
5  
6  
7 135 Priority setting partnership was “Does treatment (with neurosurgery or stereotactic  
8  
9 136 radiosurgery) or no treatment improve outcome for people diagnosed with a cavernoma?” This  
10  
11 137 pilot randomised controlled trial (RCT) aims to determine the feasibility of answering this  
12  
13 138 question in a main phase RCT.

14  
15 139

16  
17 140 **Methods and analysis:** We will perform a pilot phase, parallel group, pragmatic RCT involving  
18  
19 141 approximately 60 children or adults with mental capacity, resident in the UK or Ireland, with  
20  
21 142 an unresected symptomatic brain cavernoma. Participants will be randomised by web-based  
22  
23 143 randomisation 1:1 to treatment with surgery (neurosurgery or stereotactic radiosurgery) and  
24  
25 144 medical management versus medical management alone, stratified by pre-randomisation  
26  
27 145 preference for type of surgery. In addition to 13 feasibility outcomes, the primary clinical  
28  
29 146 outcome is symptomatic intracranial haemorrhage or new persistent/progressive focal  
30  
31 147 neurological deficit measured at six monthly intervals. An integrated QuinteT recruitment  
32  
33 148 intervention (QRI) evaluates screening logs, audio recordings of recruitment discussions, and  
34  
35 149 interviews with recruiters and patients/parents/carers to identify and address barriers to  
36  
37 150 participation. A Patient Advisory Group has co-designed the study and will oversee its  
38  
39 151 progress.

40  
41  
42 152

43  
44  
45 153 **Ethics and dissemination:** This study was approved by the Yorkshire and The Humber –  
46  
47 154 Leeds East Research Ethics Committee (21/YH/0046). We will submit manuscripts to peer  
48  
49 155 reviewed journals, describing the findings of the QRI and the CARE pilot trial. We will present  
50  
51 156 at national specialty meetings. We will disseminate a plain English summary of the findings of  
52  
53 157 the CARE pilot trial to participants and public audiences with input from, and  
54  
55 158 acknowledgement of, the Patient Advisory Group.

56  
57 159

58  
59 160 **Registration:** ISRCTN registration number 41647111  
60

1  
2  
3 161  
45 162 **STRENGTHS AND LIMITATIONS OF THIS STUDY**

- 7 163 • This pilot trial addresses the top uncertainty about the management of brain cavernoma.
- 9 164 • Extensive patient, carer and public involvement in the prioritisation of the study question,  
11 165 protocol design, study oversight, support for participants, and understanding of barriers to  
13 166 participation.
- 15 167 • A QuinteT recruitment intervention (QRI) is refining approaches to participant recruitment  
17 168 and consent processes to maximise participation.
- 19 169 • Patients will not be blinded to treatment allocation. This introduces potential risks of  
21 170 performance bias. We will minimise information bias by blinded outcome adjudication.  
22  
23  
24  
25  
26  
27  
28  
29  
30  
31  
32  
33  
34  
35  
36  
37  
38  
39  
40  
41  
42  
43  
44  
45  
46  
47  
48  
49  
50  
51  
52  
53  
54  
55  
56  
57  
58  
59  
60

## 171 INTRODUCTION

172 Symptomatic brain cavernomas are diagnosed in approximately 160 people in the UK annually  
173 and cause intracranial haemorrhage and epilepsy.[1–3] Systematic reviews of treatments for  
174 cavernomas from 2019 and 2022 have identified only observational studies.[4–7] A  
175 randomised controlled trial (RCT) is required to determine whether treatment with surgery or  
176 stereotactic radiosurgery (SRS) improves outcome, compared with medical management  
177 alone, for patients with symptomatic brain cavernoma.[8] We aim to conduct Cavernomas: A  
178 Randomised Evaluation (CARE) pilot trial to address this. This paper is a published summary  
179 of the full protocol (Supplementary material 1).

180

### 181 Objectives

182 The primary objective is to assess the feasibility of performing a definitive main phase of a  
183 RCT comparing medical management to medical and surgical management (with  
184 neurosurgery or SRS) for improving outcome for people with symptomatic brain cavernoma.  
185 Secondary objectives are: (1) to set up a collaborative network of patient advocacy  
186 organisations and professional representatives at neuroscience centres in the UK and Ireland;  
187 (2) to understand recruitment processes and barriers and optimise informed consent and  
188 recruitment as part of a QuinteT recruitment intervention (QRI); and (3) conduct the CARE  
189 pilot trial for approximately 60 people with symptomatic brain cavernoma.

190

## 191 METHODS AND ANALYSIS

### 192 Design

193 Two-arm, parallel group randomised feasibility trial with an integrated QRI comparing medical  
194 management to medical and surgical management stratified by preferred type of surgical  
195 management (figure 1).

196

### 197 Setting

1  
2  
3 198 Participants will be recruited in secondary care settings in the UK and Ireland, from a  
4  
5 199 collaborative network of research sites, with input from the patient advocacy organisation  
6  
7 200 Cavernoma Alliance UK (CAUK). Neurosurgery and follow-up will be conducted by regional  
8  
9 201 neuroscience centres in the United Kingdom and Ireland. SRS will be performed at the  
10  
11 202 National Centre for Stereotactic Radiosurgery in Sheffield or the Queen Square Radiosurgery  
12  
13 203 Centre.  
14  
15  
16 204

## 17 205 **Eligibility**

### 18 206 *Inclusion criteria:*

- 19 207 1. People of any age
- 20 208 2. At least one brain cavernoma diagnosed by brain MRI that included a gradient echo or  
21 209 susceptibility-weighted sequence, according to standard diagnostic criteria.[9,10]  
22 210 3. Clinical history attributable to a brain cavernoma of:[11,12]
  - 23 211 a. Symptomatic stroke due to haemorrhage or
  - 24 212 b. Symptomatic stroke due to a persistent or progressive non-haemorrhagic, or  
25 213 not otherwise specified, focal neurological deficit, or
  - 26 214 c. Epileptic seizure(s) meeting the definition of definite or probable cavernoma-  
27 215 related epilepsy.
- 28 216 4. Patient and doctor are uncertain about medical management or medical and surgical  
29 217 management of the symptomatic brain cavernoma, following consultation with a  
30 218 neurosurgeon.
- 31 219 5. Patient has mental capacity to consent for themselves (adult participants or paediatric  
32 220 participants with capacity) or parent/legal guardian provides consent (paediatric  
33 221 participants).

34 222 There is no time limit on when a patient may be recruited following the presentation and  
35 223 diagnosis of a brain cavernoma. Patients who have previously received surgical management  
36  
37  
38  
39  
40  
41  
42  
43  
44  
45  
46  
47  
48  
49  
50  
51  
52  
53  
54  
55  
56  
57  
58  
59  
60

224 may be included so long as the symptomatic brain cavernoma has not been completely  
225 removed/obliterated.

226 *Exclusion criteria*

- 227 1. Surgical management of a solitary symptomatic brain cavernoma with MRI evidence  
228 of cavernoma removal/obliteration
- 229 2. Spinal cavernoma alone, without symptomatic brain cavernoma
- 230 3. Asymptomatic brain cavernoma. Patients with radiographic cavernoma enlargement  
231 (with or without intralesional haemorrhage) but without new symptoms are still  
232 regarded as asymptomatic
- 233 4. Previously randomised in the CARE pilot trial

234 **Co-enrolment**

235 Inclusion in another RCT or observational study does not preclude participation in the CARE  
236 pilot trial as long as: participants are not overburdened; their inclusion would be unlikely to  
237 confound the CARE pilot trial's results or complicate attribution of serious adverse events and  
238 outcomes; the protocol of the other study does not preclude co-enrolment in the CARE pilot  
239 trial; and co-enrolment has been agreed with the Chief Investigators of all studies involved in  
240 co-enrolment.

242 **Interventions**

243 Patients randomised to medical and surgical management will receive neurosurgical excision  
244 or Gamma Knife SRS for their brain cavernoma, in addition to medical management (see  
245 comparator), according to what is available in standard clinical practice in the participant's  
246 health service.

248 *Neurosurgical excision*

249 Surgery will be undertaken by a consultant neurosurgeon who will be responsible for  
250 neurosurgical aspects of clinical care of that patient in CARE. The neurosurgical technique to

1  
2  
3 251 resect the cavernoma, including any operative adjuncts, will be that used by that consultant  
4  
5 252 neurosurgeon in usual clinical practice and tailored to each patient according to the consultant  
6  
7 253 neurosurgeon's discretion. Post-operative MRI scan performed within 72h of surgery is  
8  
9 254 recommended, but not mandated, to confirm resection completeness.  
10

11  
12 255

### 13 256 *Stereotactic radiosurgery*

14  
15 257 Standard clinical treatment protocols will be used to target the brain cavernoma but not  
16  
17 258 surrounding haemosiderin. Treatment dosages will range from 12-16Gy depending on the  
18  
19 259 size, shape, definition and site of the cavernoma. If intracerebral haemorrhage has occurred  
20  
21 260 from the cavernoma, radiosurgery will be performed once the haematoma is judged to have  
22  
23 261 been reabsorbed to minimise radiation exposure and treatment volume.  
24  
25

26 262

### 27 28 263 **Comparator**

29  
30 264 Medical management constitutes standard medical care for brain cavernoma according to UK  
31  
32 265 guidelines.[13] This may include anti-epileptic drug therapy, rehabilitation of neurological  
33  
34 266 deficits, medical treatment of other neurological symptoms, psychological support, and MRI  
35  
36 267 monitoring, according to clinicians involved in each patient's care.[11]  
37  
38

39 268

### 40 41 269 **Ancillary and post-trial care**

42  
43 270 There are no provisions for ancillary or care for participants after the trial ends. Because  
44  
45 271 interventions in the CARE pilot trial are provided in standard clinical practice aftercare will  
46  
47 272 occur as standard practice.  
48

49 273

### 50 51 274 **QuinteT recruitment intervention**

#### 52 275 *Phase 1*

53  
54 276 Prior to recruitment to study commencement, the QRI researcher qualitatively evaluated  
55  
56 277 factors that may influence recruitment using focus groups comprised of healthcare  
57  
58 278 professionals. The Patient, carer and public Advisory Group (PAG) provided further relevant  
59  
60

1  
2  
3 279 input. The QRI researcher observed all CARE pilot trial management group (TMG) and trial  
4  
5 280 steering committee (TSC) meetings during protocol development.  
6

7 281  
8

9 282 During recruitment, the QRI researcher used screening logs, recruitment consultation  
10  
11 283 recordings, interviews with CARE researchers and participants, and observation of trial  
12  
13 284 meetings to investigate recruitment obstacles.  
14

15 285  
16

17  
18 286 *Phase 2*

19  
20 287 In parallel, findings from phase 1 were presented to the Chief Investigator (CI) and TMG and  
21  
22 288 used to implement measures to improve recruitment and information provision.  
23

24 289

## 25 26 290 **Outcomes**

27  
28 291 *Primary outcome*

29  
30 292 We will estimate these measures of feasibility:

- 31  
32 293 1. What proportion of the collaborating centres take part and recruit participants to the  
33  
34 294 CARE pilot trial?  
35  
36 295 2. Can the investigators implement trial procedures correctly?  
37  
38 296 3. What proportion of screened patients are eligible?  
39  
40 297 4. What proportions of eligible patients are approached and randomised (and why are  
41  
42 298 eligible patients not approached or not randomised)?  
43  
44 299 5. What is the distribution of participants between neurosurgery and stereotactic  
45  
46 300 radiosurgery?  
47  
48 301 6. Do participants adhere to the allocated intervention and follow-up?  
49  
50 302 7. How complete are baseline, imaging and outcome data?  
51  
52 303 8. What are the outcome event rates?  
53  
54 304 9. How do the baseline characteristics, outcome event rates and differences between  
55  
56 305 treatment groups compare to observational data about outcomes during medical  
57  
58 306 management or after medical and surgical management?  
59  
60

- 1  
2  
3 307 10. What estimates of effect size/variability should be used in the design of the CARE  
4  
5 308 definitive main phase trial?  
6  
7 309 11. What is the sample size required for a definitive trial to address the overall question  
8  
9 310 over a 10-year follow-up?  
10  
11 311 12. Can the CARE pilot trial data describe care pathways, linked to health states and  
12  
13 312 outcomes, to develop a robust economic model to evaluate cost effectiveness in a  
14  
15 313 CARE definitive main phase trial?  
16  
17 314 13. Which international research partners in other countries could contribute to the CARE  
18  
19 315 definitive main phase trial?  
20  
21  
22 316

23  
24 317 *Primary clinical outcome*

25  
26 318 Intracranial haemorrhage or new persistent/progressive focal neurological deficit due to brain  
27  
28 319 cavernoma or surgical management (neurosurgery or stereotactic radiosurgery), whether fatal  
29  
30 320 (leading to death within 30 days of the outcome event) or non-fatal.  
31  
32

33 321

34  
35 322 *Secondary clinical outcomes*

- 36  
37 323 1. Death not due to a primary clinical outcome  
38  
39 324 2. Liverpool Seizure Severity Scale plus epileptic seizure frequency (number of seizures  
40  
41 325 in the preceding four weeks, and attainment of one-year seizure freedom)  
42  
43 326 3. Modified Rankin Scale (mRS) score  
44  
45 327 4. National Institute of Health Stroke Scale Score (NIHSS; adult or paediatric)  
46  
47 328 5. EQ-5D-5L in adults and EQ-5D-Y in children  
48  
49 329 6. Karnofsky Performance Status (KPS) scale in adults and Lanksy Play-Performance  
50  
51 330 Scale (LPS) in children  
52

53  
54 331 We will also collect data to estimate health service use and healthcare and socioeconomic  
55  
56 332 costs during the entire duration of follow-up.  
57

58  
59 333  
60



1  
2  
3 334 **Participant timeline**  
4

5 335 A detailed timeline for data collection is provided in table 1.  
6

7 336  
8

9 337 *Identification and screening*  
10

11 338 The research team will identify eligible patients from the UK and Ireland from multiple sources  
12

13 339 including data on admissions, outpatient appointments, referrals, and routine brain imaging.  
14

15 340 Diagnoses may be made at any time during or prior to recruitment. CAUK and affiliated groups  
16

17 341 will share study information and direct interested patients to Consultant Cavernoma Contacts  
18

19 342 at CARE pilot trial sites or to their own clinician.  
20  
21

22 343  
23

24 344 *Assessment of eligibility*  
25

26 345 Eligibility will be confirmed following discussion with the patient and a specialist in the type of  
27

28 346 treatment that is thought to be most effective for surgical management. Eligibility may be  
29

30 347 informed by multidisciplinary discussion.  
31  
32

33 348  
34

35 349 *Baseline visit and consent*  
36

37 350 There is no specific time window for approaching eligible patients for consent. The baseline  
38

39 351 visit and consent meeting may be conducted remotely or in person, at the time of  
40

41 352 randomisation or shortly prior to this. The research team will collect a venous blood sample of  
42

43 353 up to 10mL into an EDTA blood tube for genetic analysis during face-to-face visits.  
44  
45

46 354  
47

48 355 *Surgical treatment*  
49

50 356 It is expected, but not mandated, that surgical management will be delivered within three  
51

52 357 months of randomisation. Adherence will be assessed remotely by the Trial Coordinating  
53

54 358 Centre (TCC) at three months.  
55

56 359  
57

58 360 *Qualitative interviews*  
59  
60

1  
2  
3 361 In-depth interviews will be conducted by the QRI researcher in a sample of eligible patients  
4  
5 362 from a variety of sites who have been approached to take part in the trial, including those  
6  
7 363 accepting or declining participating, with priority given to those declining so as to explore  
8  
9 364 reasons why. Purposive sampling will be used to identify patients. Interviews will take place  
10  
11 365 within three months of the decision about participation.  
12

13 366

14  
15  
16 367 *Six-month follow-up visit*

17  
18 368 Participants will be asked to attend for their first six-month follow-up visit in person to perform  
19  
20 369 a brain MRI. Outcome questionnaires will be completed. If not collected at the baseline visit,  
21  
22 370 a blood sample will be obtained.  
23

24 371

25  
26 372 *Six-monthly central follow-up*

27  
28 373 The TCC will subsequently perform six-monthly postal follow-up, including completion of  
29  
30 374 outcome questionnaires, after checking the patient's vital status with their general practitioner.  
31  
32 375 A researcher will contact non-responders electronically.  
33

34 376

35  
36  
37 377 *Long-term follow-up*

38  
39 378 We will ask study participants to consent to long-term follow-up, beyond the planned follow-  
40  
41 379 up in the CARE pilot trial, including the use of routinely collected data in case the CARE pilot  
42  
43 380 proceeds into a definitive main phase trial.  
44  
45  
46  
47  
48  
49  
50  
51  
52  
53  
54  
55  
56  
57  
58  
59  
60

381 **Table 1: Table of assessments.**

| Assessment                                                               | Identification and Screening | Baseline visit | Within 3 months of baseline | 6-month local in-person follow-up | 6-monthly central follow-up |
|--------------------------------------------------------------------------|------------------------------|----------------|-----------------------------|-----------------------------------|-----------------------------|
| Assessment of eligibility                                                | X                            |                |                             |                                   |                             |
| Screening end enrolment logs                                             | X                            |                |                             |                                   |                             |
| Consent to recruitment conversation recordings                           | X <sup>1</sup>               |                |                             |                                   |                             |
| Consent to qualitative interview                                         | X                            |                |                             |                                   |                             |
| Recording of patient recruitment conversations                           | X <sup>2</sup>               | X <sup>2</sup> |                             |                                   |                             |
| Consent to randomisation                                                 | X <sup>3</sup>               | X <sup>3</sup> |                             |                                   |                             |
| Demographic, clinical, socio-economic, medication, and radiographic data |                              | X              |                             |                                   |                             |
| DNA sample                                                               |                              | X              |                             |                                   |                             |
| Provision of diagnostic brain imaging                                    |                              | X              |                             |                                   |                             |
| Questionnaires                                                           |                              | X              |                             | X                                 | X                           |
| Randomisation                                                            |                              | X              |                             |                                   |                             |
| Cavernoma surgical management                                            |                              |                | X                           |                                   |                             |
| Repeat brain MRI                                                         |                              |                |                             | X                                 |                             |
| Outcomes and adverse events                                              |                              |                |                             | X                                 | X                           |
| Qualitative interview                                                    |                              |                | X <sup>4</sup>              |                                   |                             |

382

383 1 – Research teams will be asked to capture verbal consent to audio-recordings of recruitment conversations when the approach is made to the participant. If this is not possible at this time,  
 384 consent may be captured during subsequent recruitment conversations.

385 2 – Recordings of recruitment conversations with patients should be captured (as requested) wherever the CARE pilot trial is discussed (illustrated here but not restricted to Screening and  
 386 Baseline Visit).

387 3 – Consent to participation in CARE may be collected at the Baseline Visit or in advance, during the Screening stage.

388 4 – Interviews with patients will take place within 3 months of being invited to take part in the trial.

1  
2  
3 389 **Sample size**  
4

5 390 Approximately 240 people will be newly-diagnosed with symptomatic brain cavernoma during  
6  
7 391 18 months of recruitment.[3] We aim for all of these patients to be screened, but if 10% are  
8  
9 392 missed and 10% decline to participate, we expect research teams to identify 190 patients. In  
10  
11 393 the ARUBA trial, 226/726 (31%) of the eligible patients approached were randomised, so we  
12  
13 394 expect at least 60 patients with symptomatic brain cavernoma to be randomised in the CARE  
14  
15 395 pilot trial.[14]  
16  
17

18 396

19  
20 397 **Recruitment and consent**  
21

22 398 Eligible patients will be approached for recruitment during or following discussion with relevant  
23  
24 399 secondary care specialists by research staff who are members of or affiliated to the clinical  
25  
26 400 team and have undergone standardised training on trial-related procedures. An invitation letter  
27  
28 401 may be sent to the patient in advance. Participant information leaflets and informed consent  
29  
30 402 forms will be provided (supplementary material 2). For children, participant information leaflets  
31  
32 403 are available for children 0-5 years old, 6-10 years old and 11-15 years old. The patient or the  
33  
34 404 parent/guardian will be given as much time as they require to consider the study information  
35  
36 405 and ask questions. Written informed consent may be recorded in paper forms, electronic  
37  
38 406 copies thereof, or an online electronic consent form. Children aged 6-15 who can understand  
39  
40 407 it will be given the option of providing assent.  
41  
42

43 408

44  
45 409 When a child recruited into the trial reaches the age of 16 years (or 18 years old in the Republic  
46  
47 410 of Ireland) and is therefore competent to provide consent, they should be re-consented at their  
48  
49 411 next 6-month follow-up review. No further data will be collected until a signed consent form  
50  
51 412 has been received.  
52

53 413

54  
55 414 *Consent to be contacted for an interview exploring reasons for declining participation*  
56

57 415 Patients or their parents/carers who decline participation in the CARE pilot trial will be invited  
58  
59 416 to consent to participate in an interview with the QRI researcher, exploring their experiences  
60

1  
2  
3 417 of being approached and invited to participate. Where parents/carers consent to take part in  
4  
5 418 an interview, the child/young person may attend and contribute.  
6

7 419  
8

#### 9 420 **Allocation**

10  
11 421 The consensus preference agreed between each patient and their clinician for neurosurgery  
12  
13 422 or SRS, should randomisation allocate them to medical and surgical management, will be  
14  
15 423 recorded at the baseline visit. If there is no clear preference and both are available, the patient  
16  
17 424 will be randomly allocated to the type of surgical treatment they will receive, if allocated to  
18  
19 425 surgical treatment (figure 1). Participants in these two strata will be assigned 1:1 to medical  
20  
21 426 management or medical and surgical management using permuted blocks. Allocation will be  
22  
23 427 concealed until participants are enrolled and assigned using central web-based  
24  
25 428 randomisation. Patients will be informed of their treatment allocation following randomisation.  
26  
27  
28  
29

30 429

#### 31 430 **Blinding**

32  
33 431 Treatment allocation in the CARE pilot trial is not blinded, and is therefore open to participants,  
34  
35 432 treating clinicians and research staff.  
36

37 433

38  
39 434 We will aim to keep outcome event assessors blind to treatment allocation. We will measure  
40  
41 435 how often assessors are unblinded to treatment allocation during the process of event  
42  
43 436 adjudication.  
44

45 437

#### 46 438 **Data collection**

47  
48  
49 439 Data concerning demographic, socioeconomic, medical history will be collected at baseline  
50  
51 440 visit alongside the following patient-reported questionnaires: EQ5D-5L for adults and EQ5D-  
52  
53 441 3Y for children and the Liverpool Seizure Severity Scale. Research staff will assess modified  
54  
55 442 mRS score, NIHSS (adult or paediatric, if examined in person), KPS (adults) and LPS  
56  
57 443 (children). Research teams will upload pseudo-anonymised DICOM images of diagnostic  
58  
59 444 brain imaging for validation by a senior neuroradiologist to confirm or refuse eligibility.  
60

1  
2  
3 445

4  
5 446 In-depth interviews will be conducted by the qualitative researcher within three months of their  
6  
7 447 participation decision.  
8

9 448

10  
11 449 Participants will be asked to attend their six-month follow-up visit in person for brain MRI to  
12  
13 450 assess cavernoma presence and size, as a measure of treatment efficacy. As a minimum  
14  
15 451 standard, T1-weighted, T2-weighted, and haem-sensitive gradient recalled echo or  
16  
17 452 susceptibility-weighted imaging will be required. We will collect any other sequences  
18  
19 453 performed. Images will be uploaded to the trial database and radiology department of each  
20  
21 454 site will issue a clinical report. The research team will record clinical outcome events since  
22  
23 455 randomisation and the details of surgery or SRS. Imaging studies performed because of an  
24  
25 456 outcome event will be uploaded. The same patient reported questionnaires and standardised  
26  
27 457 assessments used at baseline will be assessed at the first six-month visit.  
28  
29

30 458

31  
32 459 After this the TCC will undertake six-monthly postal, telephone or email follow-up.  
33  
34 460 Questionnaires will ask about disability, health-related quality of life, the occurrence of primary  
35  
36 461 or secondary clinical outcomes, serious adverse events, the occurrence of surgical  
37  
38 462 management of the brain cavernoma (described above), and relevant concomitant  
39  
40 463 medications (anti-epileptic drugs, propranolol, antiplatelet agents, anticoagulant agents, and  
41  
42 464 statins).  
43  
44

45 465

#### 46 466 **Retention**

47  
48 467 We aim for >95% retention of participants at six months with <10% treatment group switches  
49  
50 468 or loss to follow-up.  
51

52 469

#### 53 470 **Data management**

54  
55 471 Personal data will be processed by site research teams, the TCC at the University of  
56  
57 472 Edinburgh (UoE) and qualitative research staff at the University of Bristol (UoB). Personal data

1  
2  
3 473 will be stored securely at sites and the secure trial database, hosted on a UoE server. Brain  
4  
5 474 imaging will be managed by the Systematic Management, Archiving & Reviewing of Trial  
6  
7 475 Images Service (SMARTIS) at the UoE. Audio-recordings will be securely transferred by  
8  
9 476 qualitative research team members onto a secure drive at the UoB for long-term storage and  
10  
11 477 analysis. Audio-recordings will be labelled with the participant identification number but not  
12  
13 478 identifiable patient details. Audio-recordings will undergo targeted transcription and editing to  
14  
15 479 protect respondents' anonymity. This data will be managed using NVivo software and stored  
16  
17 480 on encrypted UoB drives.  
18  
19

20 481

## 21 482 **Data analysis**

### 22 483 *Statistical analyses*

23  
24 484 In this pilot phase, analyses are descriptive only, and there will be no formal statistical tests.  
25  
26 485 A detailed statistical analysis plan is described in Supplementary Material 3. We will quantify  
27  
28 486 the number and proportions (with 95% confidence intervals to reflect their precision) of patients  
29  
30 487 who are screened, eligible, approached, provide consent and are randomised.[15] We will  
31  
32 488 construct a CONSORT diagram to summarise the distribution and progress of participants in  
33  
34 489 the trial including the numbers of withdrawals.[16] We will report descriptively the following:  
35  
36 490 the number and the proportion of the collaborating sites that take part and recruit participants  
37  
38 491 to the CARE pilot trial; research teams' implementation of trial procedures measured by  
39  
40 492 number and type of protocol deviation; the numbers of participants allocated to neurosurgery  
41  
42 493 and stereotactic radiosurgery; adherence to the allocated intervention; completeness of follow-  
43  
44 494 up that would be due at each 6-month interval; completeness of baseline, imaging and  
45  
46 495 outcome data; the frequency of outcome events overall and in an intention-to-treat analysis  
47  
48 496 keeping patients in the treatment group to which they were allocated during all available follow-  
49  
50 497 up.  
51

52  
53  
54 498 We will also compare descriptively the characteristics of eligible patients who are screened  
55  
56 499 and do not participate in the CARE pilot trial to eligible patients who are randomised using the  
57  
58 500 characteristics recorded on the screening logs to assess generalisability (external validity) and  
59  
60

1  
2  
3 501 any recruitment bias. We will assess measures of functional outcome, to assess which has  
4  
5 502 suitable statistical properties for use in a main phase trial (such as lack of floor/ceiling effects).  
6  
7 503 We will assess whether such a measure (like the method we have used before[17]) would be  
8  
9 504 more suitable as a primary outcome in place of intracranial haemorrhage.  
10

11  
12 505

#### 13 506 *Quintet Recruitment Intervention data analysis*

14  
15  
16 507 The QuinteT researcher will analyse data using the SEAR framework to observe differences  
17  
18 508 between sites in recruitment patterns as new sites open.[15,16] Descriptive analyses will  
19  
20 509 identify where patients are lost to recruitment and the reasons why.  
21

22 510

23  
24 511 Audio recordings of recruitment conversations will be sought from a purposive sample of  
25  
26 512 recruiting sites. The audio recordings will explore information provision, management of  
27  
28 513 patient treatment preferences, and randomisation decisions to identify recruitment difficulties  
29  
30 514 and improve information provision. Analysis will employ content, thematic, and novel analytical  
31  
32 515 approaches, including targeted conversation analysis and quanti-qual appointment  
33  
34 516 timing.[18–21] Interview data will be analysed thematically using constant comparative  
35  
36 517 approaches derived from Grounded Theory methodology.[22]  
37

38  
39 518

40  
41 519 Findings from the QRI will be fed back to the CI and TMG, to determine a plan of actions to  
42  
43 520 optimise recruitment.  
44

45 521

#### 46 47 522 *Health economics analysis*

48  
49 523 The full health economic analysis plan (HEAP) is in supplementary materials 4.[23,24] We will  
50  
51 524 collect self-reported health service use and social/economic outcomes using bespoke  
52  
53 525 question sets that will inform future economic analyses.[17,25] If data collection is confirmed  
54  
55 526 as feasible, then a previously developed decision model will be updated and further developed  
56  
57 527 to incorporate data collected within this study to provide a putative estimate of cost-  
58  
59 528 effectiveness and its drivers.[26] In the context of the CARE pilot trial, the health economics



1  
2  
3 529 objectives are to: (i) design and test an optimal mechanism for the capture of resource use  
4  
5 530 and cost data in community NHS settings, NHS secondary care, participants' out of pocket  
6  
7 531 expenses and carer costs, (ii) estimate expected effect size and variance of relevant outcomes  
8  
9 532 including health-related utility and quality-adjusted life years, and (iii) identify and measure the  
10  
11 533 potential cost implications of surgical management of cavernomas.  
12

13  
14 534

15  
16 535 We will measure health-related utility, healthcare-related resource use and costs using  
17  
18 536 participant questionnaires before randomisation and at each follow-up timepoint.[19,27] These  
19  
20 537 costs will be ratified by the study team through scrutiny of the patient pathway in both arms of  
21  
22 538 the trials using available medical records to populate CRFs. We will assign unit costs using  
23  
24 539 standard national costing sources where available, or through consultation with relevant  
25  
26 540 service business managers. Costs will be summarised from the perspectives of the NHS and  
27  
28 541 personal social services, and wider society (including participants' and their carers' out-of-  
29  
30 542 pocket costs and lost productivity).  
31

32  
33 543

## 34 544 **Data Monitoring**

### 35 545 *Data monitoring committee*

36  
37  
38  
39 546 An independent Data Monitoring Committee (DMC) has been established to oversee the  
40  
41 547 safety of participants in the trial. No formal interim analyses are planned during the conduct of  
42  
43 548 the pilot trial.  
44

45 549

### 46 550 *Adverse events*

47  
48  
49 551 Participants will be instructed to contact their local research team if any symptoms develop at  
50  
51 552 any time after being randomised. Participants will be asked about the occurrence of serious  
52  
53 553 adverse events (SAEs) whenever contact is made with them between randomisation and the  
54  
55 554 final central six-monthly follow-up. SAEs may be identified via information from support  
56  
57 555 departments e.g. laboratories. Only events which are clinical outcomes on the trial or are  
58  
59 556 related to medical and surgical management and occur between randomisation and the final  
60

1  
2  
3 557 6-month follow-up review will be recorded as adverse events (AEs) or SAEs. Only AEs or  
4  
5 558 SAEs that are clinical outcomes or SAEs related to medical and surgical management will be  
6  
7 559 recorded in the electronic case report form. If there is any doubt as to whether a clinical  
8  
9 560 observation is an SAE, the event will be recorded.

10  
11 561  
12  
13 562 When an SAE occurs, site research staff will review all documentation related to the event,  
14  
15 563 assess whether an AE is an outcome in the trial and record all relevant information. If the AE  
16  
17 564 is detected by central means of follow-up, the TCC will initiate the collection of this information  
18  
19 565 but enlist the help of local site research staff. This information will be reported to the ACCORD  
20  
21 566 (Academic and Clinical Central office for Research and Development) Edinburgh Research  
22  
23 567 Governance & Quality Assurance (QA) Office immediately or within 24 hours. The Investigator  
24  
25 568 will follow-up each event until resolution. All reports sent to ACCORD and any follow-up  
26  
27 569 information will be retained in the Investigator Site File. The sponsor is responsible for  
28  
29 570 reporting SAEs that are “possibly related” to the treatment allocation and “unexpected”, to the  
30  
31 571 REC within 15 days of becoming aware of the event. The TCC will provide SAE line listings  
32  
33 572 from ACCORD for circulation prior to DMC meetings.

34  
35 573

#### 36 37 574 *Audit*

38  
39 575 Investigators and institutions involved in the study will permit trial related monitoring and audits  
40  
41 576 on behalf of the sponsor, ACCORD, research ethics committee review, and regulatory  
42  
43 577 inspection(s). Risk assessment, if required, will determine if audit by the ACCORD QA group  
44  
45 578 is required. If required, audit details will be captured in an audit plan.

46  
47 579

## 48 49 580 **ETHICS AND DISSEMINATION**

### 50 51 581 **Ethical conduct**

52  
53 582 The study will be conducted in accordance with the principles of the International Conference  
54  
55 583 on Harmonisation Tripartite Guideline for Good Clinical Practice (ICH GCP). Prior to study

1  
2  
3 584 commencement all required approvals were obtained, including that of the Yorkshire and The  
4  
5 585 Humber – Leeds East Research Ethics Committee (REC; 21/YH/0046).  
6

7 586  
8

9 **587 Protocol amendments**

10  
11 588 Any changes in research activity, except those necessary to remove a hazard to the participant  
12  
13 589 in the case of an urgent safety measure, must be reviewed and approved by the CI.  
14  
15 590 Amendments will be submitted to the sponsor for review and authorisation before being  
16  
17 591 submitted to the appropriate REC and local Research and Development team for approval.  
18  
19

20 592

21  
22 **593 Data sharing**

23  
24 594 Following publication of the primary paper, a de-identified individual participant data set will  
25  
26 595 be prepared for sharing purposes. All data requests should be submitted to the CI for  
27  
28 596 consideration. Deidentified data collected during the QRI will be made available by the QuinteT  
29  
30 597 research group to the CAUK. Other individuals wishing to access deidentified QRI data may  
31  
32 598 apply to an independent committee.  
33  
34

35 599

36  
37 **600 Publication and dissemination**

38  
39 601 We will submit manuscripts to peer reviewed journals for open access publication. We will  
40  
41 602 present our findings at meetings of relevant professional associations. We will disseminate a  
42  
43 603 plain English summary of the findings of the CARE pilot trial to participants and public  
44  
45 604 audiences. We will offer to present our project and its findings to the annual meetings of CAUK.  
46  
47

48 605

49 **606 Insurance and indemnity**

50  
51 607 The UoE has insurance in place for negligent harm caused by poor protocol design by  
52  
53 608 researchers employed by the UoE. Sites participating in the study will be liable for clinical  
54  
55 609 negligence and other negligent harm to individuals taking part in the study and covered by the  
56  
57 610 duty of care owed to them by the sites concerned. Sites which are part of the United Kingdom's  
58  
59 611 National Health Service will have the benefit of NHS Indemnity.  
60

1  
2  
3 6124  
5 **613 CONCLUSIONS**

6  
7 614 British and Irish Neurosurgery has this opportunity to demonstrate the feasibility of resolving  
8  
9 615 the top uncertainty about brain cavernoma in a definitive main phase trial. Rapid site activation  
10  
11 616 and engagement will be essential.

12  
13  
14 61715  
16 **618 FUNDING**

17  
18 619 The CARE pilot trial is funded by the National Institute for Health and Care Research  
19  
20 620 (NIHR128694), which requires publication of the trial protocol but had no other role in  
21  
22 621 manuscript preparation or the decision to publish.

23  
24 62225  
26 **623 ROLES AND RESPONSIBILITIES**

27  
28 624 Trial co-ordinating centre: Prof Rustam Al-Shahi Salman, Dr Laura Forsyth, Dr Morag  
29  
30 625 Maclean, Katherine Lewis, Dr Jacqueline Stephen, Professor Steff Lewis, Aileen Neilson, Dr  
31  
32 626 Peter Hall, Garry Milne, Eleni Sakka, Chris Linsley, Dr Julia Wade and Debbie Alexander.

33  
34 627

35  
36  
37 628 Trial Steering Committee: David White, Kathryn Douthwaite, Prof Garth Cruickshank, Mr  
38  
39 629 Richard Kerr, Prof Catherine Hewitt, Prof Haleema Shakur-Still and Mr Neil Kitchen.

40  
41 63042  
43 **631 AUTHOR STATEMENT**

44  
45 632 Conceptualisation: JJML, AB, LF, VG, PSH, KH, PH, EK, SL, CM, ARN, MR, JS, AS, CT, JW,  
46  
47 633 DW, PW, NK, RASS. Methodology: JJML, AB, LF, VG, PSH, KH, PH, EK, SL, CM, ARN, MR,  
48  
49 634 JS, AS, CT, JW, DW, PW, NK, RASS. Project administration: JJML, AB, JvB, PB, AB, NB,  
50  
51 635 DB, JC, EC, FC, MD, RD, RJE, LF, LF, IF, VG, PG, NG, KH, LSH, TH, AH, DH, PH, AI, EK,  
52  
53 636 CM, NM, RN, MCP, MR, AR, SRK, MT, CT, JW, DW, DW, PW, JW, OWW, CU, SU, RV, NK,  
54  
55 637 RASS. Funding Acquisition: LF, EK, NK, RASS. Writing – original draft: JJML. Writing – review  
56  
57 638 and editing: All. Supervision: NK, RASS.

58  
59  
60 639

1  
2  
3 640 **DECLARATION OF CONFLICTING INTERESTS**

4  
5 641 PW declares institutional unrestricted educational grant funding for stroke reperfusion course  
6  
7 642 from Stryker, Penumbra and Medtronic. MR declares that he is a Senior Clinician of the  
8  
9 643 National Centre for Stereotactic Radiosurgery.  
10

11 644

12  
13 645 **FIGURE LEGENDS**

14  
15 646 **Figure 1: Participant flow diagram**

16 647

17  
18 648 **SUPPLEMENTARY MATERIALS**

- 19  
20 649 1. Full CARE protocol v2.0 (22 March 2021)  
21  
22 650 2. Participant information leaflets and consent forms  
23  
24 651 3. Statistical analysis plan  
25  
26 652 4. Health economics analysis plan  
27  
28 653 5. Trial steering committee charter  
29  
30 654 6. Data monitoring committee charter  
31  
32  
33  
34

35 655

36  
37 656 **REFERENCES**

- 38  
39 657 1 Horne MA, Flemming KD, Su I-C, *et al.* Clinical course of untreated cerebral  
40 658 cavernous malformations: a meta-analysis of individual patient data. *Lancet Neurol*  
41 659 2016;**15**:166–73. doi:10.1016/S1474-4422(15)00303-8  
42  
43 660 2 Josephson CB, Leach JP, Duncan R, *et al.* Seizure risk from cavernous or  
44 661 arteriovenous malformations: prospective population-based study. *Neurology*  
45 662 2011;**76**:1548–54. doi:10.1212/WNL.0b013e3182190f37  
46  
47 663 3 Al-Shahi R, Bhattacharya JJ, Currie DG, *et al.* Prospective, population-based  
48 664 detection of intracranial vascular malformations in adults: the Scottish Intracranial  
49 665 Vascular Malformation Study (SIVMS). *Stroke* 2003;**34**:1163–9.  
50 666 doi:10.1161/01.STR.0000069018.90456.C9  
51  
52 667 4 Harris L, Poorthuis MHF, Grover P, *et al.* Surgery for cerebral cavernous  
53 668 malformations: a systematic review and meta-analysis. *Neurosurg Rev* 2022;**45**:231–  
54 669 41. doi:10.1007/s10143-021-01591-5  
55  
56  
57  
58  
59  
60

- 1  
2  
3 670 5 Poorthuis M, Samarasekera N, Kontoh K, *et al.* Comparative studies of the diagnosis  
4 and treatment of cerebral cavernous malformations in adults: systematic review. *Acta*  
5 671 *Neurochir (Wien)* 2013;**155**:643–9. doi:10.1007/s00701-013-1621-4  
6 672  
7  
8 673 6 Poorthuis MHF, Rinkel LA, Lammy S, *et al.* Stereotactic radiosurgery for cerebral  
9 cavernous malformations: A systematic review. *Neurology* 2019;**93**:e1971–9.  
10 674  
11 675 doi:10.1212/WNL.00000000000008521  
12  
13 676 7 Poorthuis MHF, Klijn CJM, Algra A, *et al.* Treatment of cerebral cavernous  
14 677 malformations: a systematic review and meta-regression analysis. *J Neurol*  
15 678 *Neurosurg Psychiatr* 2014;**85**:1319–23. doi:10.1136/jnnp-2013-307349  
16  
17 679 8 Glasziou P, Chalmers I, Rawlins M, *et al.* When are randomised trials unnecessary?  
18 Picking signal from noise. *BMJ* 2007;**334**:349–51. doi:10.1136/bmj.39070.527986.68  
19 680  
20 681 9 Akers A, Al-Shahi Salman R, A Awad I, *et al.* Synopsis of guidelines for the clinical  
21 682 management of cerebral cavernous malformations: consensus recommendations  
22 683 based on systematic literature review by the angioma alliance scientific advisory  
23 684 board clinical experts panel. *Neurosurgery* 2017;**80**:665–80.  
24 685  
25 686 10 Rigamonti D, Drayer BP, Johnson PC, *et al.* The MRI appearance of cavernous  
26 687 malformations (angiomas). *J Neurosurg* 1987;**67**:518–24.  
27 688  
28 689 11 Rosenow F, Alonso-Vanegas MA, Baumgartner C, *et al.* Cavernoma-related  
29 690 epilepsy: review and recommendations for management--report of the Surgical Task  
30 691 Force of the ILAE Commission on Therapeutic Strategies. *Epilepsia* 2013;**54**:2025–  
31 692 35. doi:10.1111/epi.12402  
32  
33 693 12 Al-Shahi Salman R, Berg MJ, Morrison L, *et al.* Hemorrhage from cavernous  
34 694 malformations of the brain: definition and reporting standards. Angioma Alliance  
35 695 Scientific Advisory Board. *Stroke* 2008;**39**:3222–30.  
36 696  
37 697 13 Samarasekera N, Poorthuis M, Kontoh K, *et al.* Guidelines for the management of  
38 698 cerebral cavernous malformations in adults. Genetic Alliance UK & Cavernoma  
39 699 Alliance UK 2012.  
40  
41 700 14 Mohr JP, Parides MK, Stapf C, *et al.* Medical management with or without  
42 701 interventional therapy for unruptured brain arteriovenous malformations (ARUBA): a  
43 702 multicentre, non-blinded, randomised trial. *Lancet* 2014;**383**:614–21.  
44 703  
45 704 15 Wilson C, Rooshenas L, Paramasivan S, *et al.* Development of a framework to  
46 705 improve the process of recruitment to randomised controlled trials (RCTs): the SEAR  
47  
48  
49  
50  
51  
52  
53  
54  
55  
56  
57  
58  
59  
60

- 1  
2  
3 706 (Screened, Eligible, Approached, Randomised) framework. *Trials* 2018;**19**:50.  
4  
5 707 doi:10.1186/s13063-017-2413-6  
6  
7 708 16 Eldridge SM, Chan CL, Campbell MJ, *et al.* CONSORT 2010 statement: extension to  
8 709 randomised pilot and feasibility trials. *BMJ* 2016;**355**:i5239. doi:10.1136/bmj.i5239  
9  
10 710 17 Moultrie F, Horne MA, Josephson CB, *et al.* Outcome after surgical or conservative  
11 711 management of cerebral cavernous malformations. *Neurology* 2014;**83**:582–9.  
12 712 doi:10.1212/WNL.0000000000000684  
13  
14 713 18 Wade J, Donovan JL, Lane JA, *et al.* It's not just what you say, it's also how you say  
15 714 it: opening the "black box" of informed consent appointments in randomised controlled  
16 715 trials. *Soc Sci Med* 2009;**68**:2018–28. doi:10.1016/j.socscimed.2009.02.023  
17  
18 716 19 Herdman M, Gudex C, Lloyd A, *et al.* Development and preliminary testing of the new  
19 717 five-level version of EQ-5D (EQ-5D-5L). *Qual Life Res* 2011;**20**:1727–36.  
20 718 doi:10.1007/s11136-011-9903-x  
21  
22 719 20 Rooshenas L, Paramasivan S, Jepson M, *et al.* Intensive triangulation of qualitative  
23 720 research and quantitative data to improve recruitment to randomized trials: the quintet  
24 721 approach. *Qual Health Res* 2019;**29**:672–9. doi:10.1177/1049732319828693  
25  
26 722 21 Donovan JL, Rooshenas L, Jepson M, *et al.* Optimising recruitment and informed  
27 723 consent in randomised controlled trials: the development and implementation of the  
28 724 Quintet Recruitment Intervention (QRI). *Trials* 2016;**17**:283. doi:10.1186/s13063-016-  
29 725 1391-4  
30  
31 726 22 Strauss A, Corbin J. *Grounded theory methodology. Handbook of qualitative*  
32 727 *research*. Sage Publications Inc 1994.  
33  
34 728 23 Dritsaki M, Gray A, Petrou S, *et al.* Current UK practices on health economics  
35 729 analysis plans (heaps): are we using heaps of them? *Pharmacoeconomics*  
36 730 2018;**36**:253–7. doi:10.1007/s40273-017-0598-x  
37  
38 731 24 Thorn JC, Davies CF, Brookes ST, *et al.* Content of Health Economics Analysis  
39 732 Plans (HEAPs) for Trial-Based Economic Evaluations: Expert Delphi Consensus  
40 733 Survey. *Value Health* 2021;**24**:539–47. doi:10.1016/j.jval.2020.10.002  
41  
42 734 25 Bicalho VC, Bergmann A, Domingues F, *et al.* Cerebral Cavernous Malformations:  
43 735 Patient-Reported Outcome Validates Conservative Management. *Cerebrovasc Dis*  
44 736 2017;**44**:313–9. doi:10.1159/000480125  
45  
46 737 26 Rinkel LA, Al-Shahi Salman R, Rinkel GJ, *et al.* Radiosurgical, neurosurgical, or no  
47 738 intervention for cerebral cavernous malformations: A decision analysis. *Int J Stroke*  
48 739 2019;**14**:939–45. doi:10.1177/1747493019851290  
49  
50 740 27 Royston P, Parmar MKB. Restricted mean survival time: an alternative to the hazard  
51 741 ratio for the design and analysis of randomized trials with a time-to-event outcome.  
52 742 *BMC Med Res Methodol* 2013;**13**:152. doi:10.1186/1471-2288-13-152

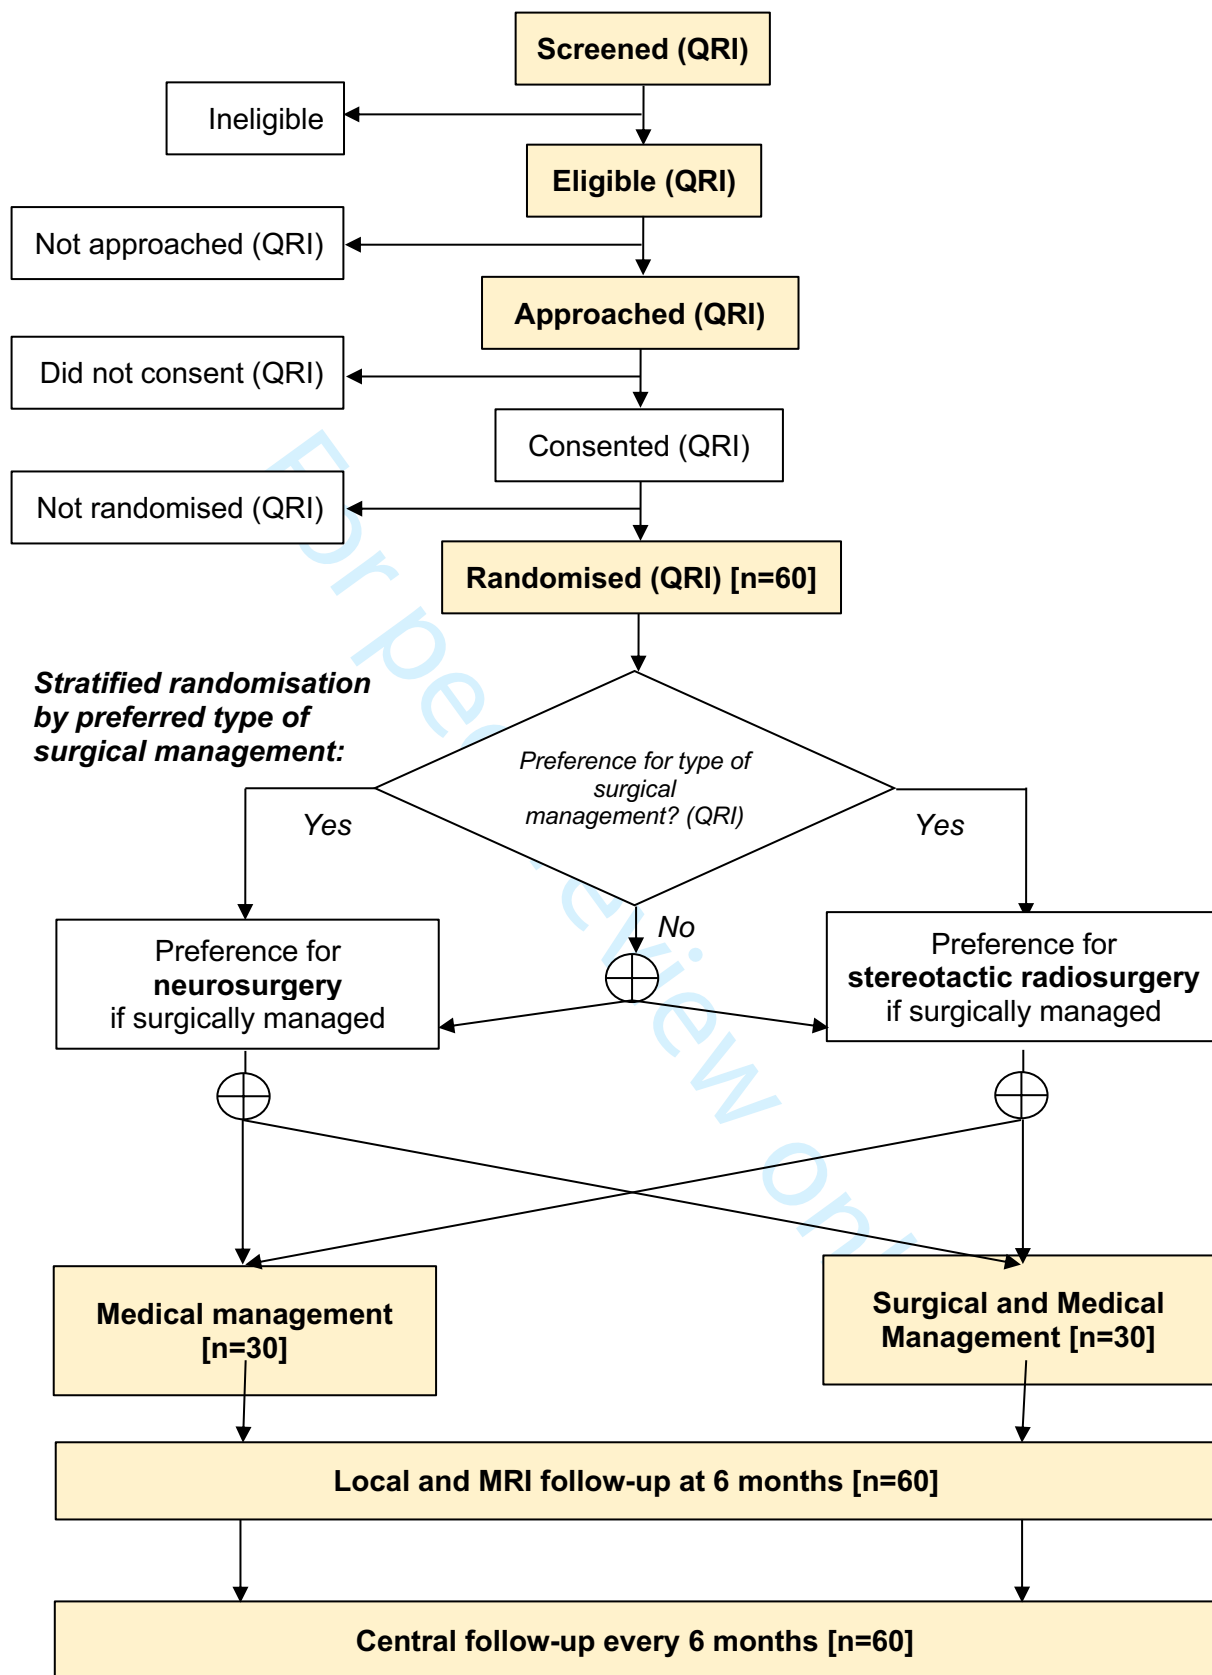

**Key:** QRI = evaluated by QuinteT Recruitment Intervention ⊕ = randomised 1:1 allocation



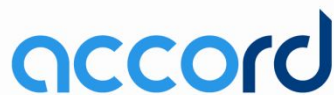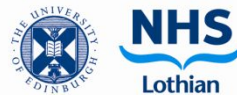

Academic and Clinical Central Office for Research and Development

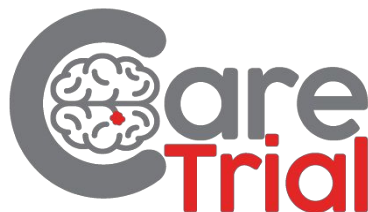

## Study Protocol

**Cavernomas A Randomised Effectiveness (CARE) pilot trial, to address the effectiveness of active treatment (with neurosurgery or stereotactic radiosurgery) versus conservative management in people with symptomatic brain cavernoma**

|                                                                                           |                                                                                                                                                                                                                                                                                                                                                                                        |
|-------------------------------------------------------------------------------------------|----------------------------------------------------------------------------------------------------------------------------------------------------------------------------------------------------------------------------------------------------------------------------------------------------------------------------------------------------------------------------------------|
| Co-sponsors                                                                               | The University of Edinburgh and/or Lothian Health Board<br>ACCORD<br>The Queen's Medical Research Institute<br>47 Little France Crescent<br>Edinburgh<br>EH16 4TJ                                                                                                                                                                                                                      |
| Trial Management Group<br>(listed alphabetically by surname after the chief investigator) | Prof Rustam Al-Shahi Salman (chief investigator)<br>Mr Neil Kitchen (co-chief investigator)<br>Dr Vijeya Ganesan<br>Dr Peter Hall<br>Dr Kirsty Harkness<br>Prof Peter Hutchinson<br>Dr Elaine Kinsella<br>Prof Steff Lewis<br>Mr Jamie Loan<br>Prof Conor Mallucci<br>Mr Matthias Radatz<br>Mr Andy Stoddart<br>Ms Carole Turner<br>Dr Julia Wade<br>Mr David White<br>Prof Phil White |
| Funder                                                                                    | National Institute for Health Research Health Technology Assessment Programme                                                                                                                                                                                                                                                                                                          |
| Funding Reference Number                                                                  | NIHR128694                                                                                                                                                                                                                                                                                                                                                                             |

CARE pilot trial

V2.0 (22Mar2021)

IRAS ID 289197

|                         |                             |
|-------------------------|-----------------------------|
| Chief Investigator      | Prof Rustam Al-Shahi Salman |
| Sponsor number          | AC20171                     |
| REC Number              | 21/YH/0046                  |
| Project registration    | To be confirmed             |
| Version Number and Date | V2.0 (22Mar 2021)           |

For peer review only

# CONTENTS

|                                                                                                                                     |           |
|-------------------------------------------------------------------------------------------------------------------------------------|-----------|
| <b>SCIENTIFIC ABSTRACT .....</b>                                                                                                    | <b>9</b>  |
| <b>PLAIN ENGLISH SUMMARY .....</b>                                                                                                  | <b>10</b> |
| <b>1 INTRODUCTION.....</b>                                                                                                          | <b>11</b> |
| 1.1 BACKGROUND.....                                                                                                                 | 11        |
| 1.1.1 What are brain cavernomas? .....                                                                                              | 11        |
| 1.1.2 What treatments are available in standard clinical practice for brain cavernoma?.....                                         | 11        |
| 1.1.3 What evidence supports medical management vs. medical and surgical management of brain cavernoma? .....                       | 12        |
| 1.1.4 Observational studies comparing medical management with medical and surgical management for brain cavernoma. ....             | 14        |
| 1.1.5 Summary of procedures, benefits and risks with medical management or medical and surgical management for brain cavernoma..... | 15        |
| 1.2 RATIONALE FOR STUDY .....                                                                                                       | 16        |
| 1.2.1 The therapeutic dilemma .....                                                                                                 | 16        |
| 1.2.2 Understanding recruitment barriers with a QuinteT recruitment intervention (QRI) .....                                        | 16        |
| 1.2.3 This feasibility study and pilot trial will inform the feasibility of a definitive main phase trial .....                     | 17        |
| 1.2.4 Patient, carer and public involvement (PCPI).....                                                                             | 17        |
| <b>2 STUDY OBJECTIVES .....</b>                                                                                                     | <b>18</b> |
| 2.1 OBJECTIVES .....                                                                                                                | 18        |
| 2.1.1 Primary objective .....                                                                                                       | 18        |
| 2.1.2 Secondary objectives .....                                                                                                    | 18        |
| 2.2 OUTCOMES.....                                                                                                                   | 18        |
| 2.2.1 Primary outcome .....                                                                                                         | 18        |
| 2.2.2 Primary clinical outcome.....                                                                                                 | 19        |
| 2.2.3 Secondary clinical outcomes .....                                                                                             | 20        |
| 2.2.4 Feasibility metrics proposed to the funder.....                                                                               | 20        |
| <b>3 STUDY DESIGN .....</b>                                                                                                         | <b>20</b> |
| 3.1 TRIAL PROFILE.....                                                                                                              | 21        |
| 3.1.1 QuinteT recruitment intervention .....                                                                                        | 22        |
| <b>4 STUDY POPULATION.....</b>                                                                                                      | <b>23</b> |
| 4.1 NUMBER OF PARTICIPANTS.....                                                                                                     | 23        |
| 4.2 INCLUSION CRITERIA .....                                                                                                        | 23        |
| 4.3 EXCLUSION CRITERIA.....                                                                                                         | 24        |
| 4.4 CO-ENROLMENT .....                                                                                                              | 24        |
| <b>5 PARTICIPANT SELECTION AND ENROLMENT.....</b>                                                                                   | <b>24</b> |
| 5.1 IDENTIFYING AND SCREENING PARTICIPANTS .....                                                                                    | 24        |
| 5.2 APPROACHING AND CONSENTING PARTICIPANTS .....                                                                                   | 25        |
| 5.2.1 Consent to the QRI.....                                                                                                       | 27        |
| 5.2.2 Consent to participate in the CARE pilot trial .....                                                                          | 27        |
| 5.2.3 Consent to be contacted for an interview exploring reasons for declining participation.....                                   | 29        |
| 5.3 SCREENING AND ENROLMENT LOGS .....                                                                                              | 29        |
| 5.4 RANDOMISATION .....                                                                                                             | 30        |

1  
2  
3  
4  
5  
6  
7  
8  
9  
10  
11  
12  
13  
14  
15  
16  
17  
18  
19  
20  
21  
22  
23  
24  
25  
26  
27  
28  
29  
30  
31  
32  
33  
34  
35  
36  
37  
38  
39  
40  
41  
42  
43  
44  
45  
46  
47  
48  
49  
50  
51  
52  
53  
54  
55  
56  
57  
58  
59  
60

- 5.4.1 Randomisation procedures.....30
- 5.4.2 Treatment allocation.....30
- 5.4.3 Blinding (masking).....30
- 5.5 WITHDRAWAL OF PARTICIPANTS.....30
  - 5.5.1 Loss of mental capacity in adult participants in England and Wales .....31
  - 5.5.2 Loss of mental capacity in adult participants in Scotland .....31
  - 5.5.3 Loss of mental capacity in adult participants in Northern Ireland ....31
  - 5.5.4 Loss of mental capacity in adult participants in the Republic of Ireland.....32
- 6 COMPARATOR .....32**
- 7 INTERVENTION.....32**
  - 7.1 Neurosurgical excision .....33
  - 7.2 Stereotactic radiosurgery .....33
- 8 STUDY ASSESSMENTS .....33**
  - 8.1 STUDY ASSESSMENTS .....33
    - 8.1.1 Table of assessments.....34
    - 8.1.2 Screening .....35
    - 8.1.3 Informed consent.....35
    - 8.1.4 Baseline visit.....35
    - 8.1.5 Three-month adherence check.....36
    - 8.1.6 Six-month local follow-up visit .....36
    - 8.1.7 Six-monthly central follow-up visit .....37
    - 8.1.8 Patient Interviews .....37
  - 8.2 LONG TERM FOLLOW UP .....38
  - 8.3 BRAIN MAGNETIC RESONANCE IMAGING .....38
  - 8.4 OUTCOME EVENT ADJUDICATION .....38
  - 8.5 DNA SAMPLE STORAGE AND ANALYSIS .....38
- 9 DATA COLLECTION .....39**
  - 9.1 SOURCE DATA DOCUMENTATION.....39
  - 9.2 CASE REPORT FORMS.....39
  - 9.3 STUDY DATABASE .....39
  - 9.4 QRI DATA COLLECTION .....39
    - 9.4.1 Screening log data.....39
    - 9.4.2 Recordings of recruitment conversations .....39
    - 9.4.3 Patient and staff interviews.....40
    - 9.4.4 Meetings .....40
    - 9.4.5 Trial documentation.....40
- 10 DATA MANAGEMENT AND TRANSFER.....41**
  - 10.1 PERSONAL DATA .....41
  - 10.2 BRAIN MRI SCANS .....41
  - 10.3 QUINTET RECRUITMENT INTERVENTION.....41
    - 10.3.1 Recordings of recruitment conversations .....41
    - 10.3.2 Interviews .....42
    - 10.3.3 QRI documentation.....42
  - 10.4 DATA CONTROLLER .....42
  - 10.5 DATA BREACHES .....43
- 11 STATISTICS AND DATA ANALYSIS .....43**
  - 11.1 SAMPLE SIZE CALCULATION.....43
  - 11.2 PROPOSED STATISTICAL ANALYSES .....43

|    |           |                                                                   |
|----|-----------|-------------------------------------------------------------------|
| 1  |           |                                                                   |
| 2  | 11.3      | QUINTET RECRUITMENT INTERVENTION DATA ANALYSIS .....44            |
| 3  | 11.3.1    | Screening and enrolment logs.....44                               |
| 4  | 11.3.2    | Recordings of recruitment conversations and interviews .....44    |
| 5  |           |                                                                   |
| 6  | <b>12</b> | <b>HEALTH ECONOMICS AND DATA ANALYSIS.....44</b>                  |
| 7  | <b>13</b> | <b>ADVERSE EVENTS.....45</b>                                      |
| 8  | 13.1      | DEFINITIONS.....45                                                |
| 9  | 13.2      | IDENTIFYING SAEs.....46                                           |
| 10 | 13.3      | RECORDING SAEs .....46                                            |
| 11 | 13.3.1    | Pre-existing medical conditions .....46                           |
| 12 | 13.3.2    | Worsening of the underlying condition during the trial.....46     |
| 13 |           |                                                                   |
| 14 | 13.4      | ASSESSMENT OF AEs AND SAEs.....46                                 |
| 15 | 13.4.1    | Assessment of Seriousness .....47                                 |
| 16 | 13.4.2    | Assessment of Causality .....47                                   |
| 17 | 13.4.3    | Assessment of Expectedness .....47                                |
| 18 | 13.4.4    | Assessment of Severity .....47                                    |
| 19 |           |                                                                   |
| 20 | 13.5      | REPORTING OF SAEs .....48                                         |
| 21 |           |                                                                   |
| 22 | <b>14</b> | <b>PREGNANCY .....48</b>                                          |
| 23 | <b>15</b> | <b>OVERSIGHT ARRANGEMENTS .....48</b>                             |
| 24 | 15.1      | TRIAL MANAGEMENT GROUP .....48                                    |
| 25 | 15.2      | TRIAL STEERING COMMITTEE .....48                                  |
| 26 | 15.3      | DATA MONITORING COMMITTEE.....49                                  |
| 27 | 15.4      | PATIENT ADVISORY GROUP .....49                                    |
| 28 | 15.5      | INSPECTION OF RECORDS .....49                                     |
| 29 | 15.6      | STUDY MONITORING AND AUDIT .....49                                |
| 30 |           |                                                                   |
| 31 | <b>16</b> | <b>GOOD CLINICAL PRACTICE .....49</b>                             |
| 32 | 16.1      | ETHICAL CONDUCT .....49                                           |
| 33 | 16.2      | INVESTIGATOR RESPONSIBILITIES.....50                              |
| 34 | 16.2.1    | Informed Consent.....50                                           |
| 35 | 16.2.2    | Study Site Staff.....50                                           |
| 36 | 16.2.3    | Data Recording.....50                                             |
| 37 | 16.2.4    | Investigator Documentation.....50                                 |
| 38 | 16.2.5    | Training.....50                                                   |
| 39 | 16.2.6    | Confidentiality.....51                                            |
| 40 | 16.2.7    | Data Protection.....51                                            |
| 41 |           |                                                                   |
| 42 |           |                                                                   |
| 43 |           |                                                                   |
| 44 |           | <b>STUDY CONDUCT RESPONSIBILITIES.....52</b>                      |
| 45 | 16.3      | PROTOCOL AMENDMENTS.....52                                        |
| 46 | 16.4      | MANAGEMENT OF PROTOCOL NON-COMPLIANCE .....52                     |
| 47 | 16.5      | SERIOUS BREACH REQUIREMENTS .....52                               |
| 48 | 16.6      | STUDY RECORD RETENTION.....53                                     |
| 49 | 16.7      | END OF TRIAL.....53                                               |
| 50 | 16.8      | CONTINUATION OF TREATMENT FOLLOWING THE END OF<br>STUDY .....53   |
| 51 | 16.9      | INSURANCE AND INDEMNITY .....53                                   |
| 52 |           |                                                                   |
| 53 |           |                                                                   |
| 54 |           |                                                                   |
| 55 |           |                                                                   |
| 56 | <b>17</b> | <b>REPORTING, PUBLICATIONS AND NOTIFICATION OF RESULTS.....54</b> |
| 57 | 17.1      | AUTHORSHIP POLICY AND REPORTING.....54                            |
| 58 | 17.2      | PUBLICATION AND DISSEMINATION .....54                             |
| 59 | 17.3      | DATA SHARING .....54                                              |
| 60 |           |                                                                   |
|    | <b>18</b> | <b>TRIAL TIMELINE .....56</b>                                     |

1

2 **19 PROTOCOL VERSION CONTROL HISTORY .....57**

3 19.1 Version 1.0 (29Jan2021) .....57

4 19.2 Version 2.0 (22Mar2021) .....57

5

6 **20 REFERENCES.....58**

7

8

9

10

11

12

13

14

15

16

17

18

19

20

21

22

23

24

25

26

27

28

29

30

31

32

33

34

35

36

37

38

39

40

41

42

43

44

45

46

47

48

49

50

51

52

53

54

55

56

57

58

59

60

For peer review only

## LIST OF ABBREVIATIONS

|         |                                                                                                                                         |
|---------|-----------------------------------------------------------------------------------------------------------------------------------------|
| 95% CI  | 95% confidence interval                                                                                                                 |
| ACCORD  | Academic and Clinical Central Office for Research & Development - Joint office for The University of Edinburgh and Lothian Health Board |
| CARE    | Cavernomas A Randomised Effectiveness trial                                                                                             |
| CAUK    | Cavernoma Alliance UK                                                                                                                   |
| CI      | Chief Investigator                                                                                                                      |
|         |                                                                                                                                         |
| CRF     | Case Report Form                                                                                                                        |
| DMC     | Data Monitoring Committee                                                                                                               |
| DWI     | Diffusion-Weighted Imaging                                                                                                              |
| eCRF    | Electronic Case Report Form                                                                                                             |
| ECTU    | Edinburgh Clinical Trials Unit                                                                                                          |
| FLAIR   | Fluid Attenuated Inversion Recovery                                                                                                     |
| GCP     | Good Clinical Practice                                                                                                                  |
| ICF     | Informed Consent Form                                                                                                                   |
| ICH GCP | International Conference on Harmonisation for Good Clinical Practice                                                                    |
| MRI     | Magnetic Resonance Imaging                                                                                                              |
| PAG     | Patient, carer and public involvement Advisory Group                                                                                    |
| PI      | Principal Investigator                                                                                                                  |
| PIL     | Patient Information Leaflet                                                                                                             |
| QA      | Quality Assurance                                                                                                                       |
| QRI     | QuinteT Recruitment Intervention                                                                                                        |
| QuinteT | Qualitative Research Integrated within Trials                                                                                           |
| RaDAR   | Rare Disease Ascertainment and Recruitment                                                                                              |
| REC     | Research Ethics Committee                                                                                                               |
| RCT     | Randomised controlled trial                                                                                                             |
| SAIVMs  | Scottish Audit of Intracranial Vascular Malformations                                                                                   |
| SOP     | Standard Operating Procedure                                                                                                            |
| TCC     | Trial Coordinating Centre                                                                                                               |

CARE pilot trial

V2.0 (22Mar 2021)

IRAS ID 289197

|            |                          |
|------------|--------------------------|
| <b>TMG</b> | Trial Management Group   |
| <b>TSC</b> | Trial Steering Committee |

For peer review only

1  
2  
3  
4  
5  
6  
7  
8  
9  
10  
11  
12  
13  
14  
15  
16  
17  
18  
19  
20  
21  
22  
23  
24  
25  
26  
27  
28  
29  
30  
31  
32  
33  
34  
35  
36  
37  
38  
39  
40  
41  
42  
43  
44  
45  
46  
47  
48  
49  
50  
51  
52  
53  
54  
55  
56  
57  
58  
59  
60



## SCIENTIFIC ABSTRACT

This is a pilot randomised controlled trial (RCT) to assess the feasibility of conducting a definitive main phase RCT to address the research question commissioned by the NIHR HTA, "How effective is active treatment (with neurosurgery or stereotactic radiosurgery) versus conservative management in people with symptomatic brain cavernoma?" The terms 'conservative management' and 'active treatment' were used in the commission, but throughout this protocol we will refer to 'conservative management' as 'medical management' and 'active treatment' as 'medical and surgical management'. We will assess: collaborator engagement; proportions of screened patients who are eligible, approached, consented, or randomised; barriers to recruitment; RCT procedure implementation; adherence; data completeness; outcome event rates; and generalisability.

At least 160 people with brain cavernomas are newly diagnosed after symptoms due to stroke or epilepsy in the UK each year. A James Lind Alliance Priority Setting Partnership found that the top research priority for cavernoma was, "Does treatment (with neurosurgery or stereotactic radiosurgery) or no treatment improve outcome for people diagnosed with a cavernoma?". A RCT is required to answer this question, but systematic reviews and trial register searches have not revealed any such RCTs.

The Cavernomas A Randomised Effectiveness (CARE) pilot trial aims to:

1. Engage a collaboration of specialists and patient advocacy groups in the UK and Ireland.
2. Establish a pilot RCT, with an embedded qualitative study to understand the anticipated recruitment processes and address any barriers.
3. Assess the feasibility of performing a definitive main phase of the RCT.

The CARE pilot trial will include:

- I. A pilot phase parallel group RCT for patients with symptomatic brain cavernoma, comparing medical management versus medical and surgical management (with neurosurgery or stereotactic radiosurgery), with randomisation stratified by preferred type of surgical management. Collaborators will keep screening logs to capture characteristics of patients screened, eligible, approached, consented and randomised. This prospective randomised open blinded end-point RCT will recruit ~60 participants.
- II. A QuinteT recruitment intervention (QRI) will evaluate screening logs and incorporate qualitative research to understand recruitment processes and barriers and identify actions to address barriers.

We will use (I) and (II) to estimate the feasibility and generalisability of a definitive main phase of the CARE RCT by extending the UK collaboration to other patient support organisations and clinical communities elsewhere in the world.

## PLAIN ENGLISH SUMMARY

A cavernoma is a cluster of blood vessels that form blood-filled 'caverns' in the brain that look like a raspberry. Cavernomas can bleed into the brain and cause a stroke. Cavernomas can also cause a seizure or epilepsy. About 160 people in the UK each year are diagnosed with a cavernoma that has caused symptoms. Stroke and seizure may lead to disability, handicap and occasionally death. In standard practice in the UK, most people with cavernomas have medical management (which may involve scans, drugs, or rehabilitation) to manage these symptoms. About one fifth also have 'surgical management' with either brain surgery to remove a cavernoma or stereotactic radiosurgery to stabilise it with radiation. Surgical management can cause death, disability, and handicap.

The pros and cons of medical management versus medical and surgical management are finely balanced. The most reliable way of finding out which management is best is to do a randomised trial, in which suitable patients are allocated to medical management or medical and surgical management at random. This has never been done with cavernomas, and this was the top priority identified by a Priority Setting Partnership for cavernoma.

The NIHR wants research to be done to find out whether enough patients can be found for a randomised trial comparing 'medical management with 'medical and surgical management' of symptomatic cavernomas. We need to know this because cavernomas are rare and we do not know whether patients and doctors will take part. In three years, we will:

- (1) Create a network of specialists to do this study. We will include the UK and Ireland patient support organisations for people with cavernoma (Cavernoma Alliance UK - CAUK) and doctors representing the relevant specialties at all the major hospitals specialising in decisions about cavernoma treatment in the UK and Ireland.
- (2) Invite newly diagnosed patients to join a pilot phase of a randomised controlled trial. Of 190 people diagnosed with brain cavernoma in 18 months, we estimate that 60 of them will enrol in the randomised trial. We will study why some patients take part in the randomised trial and others don't. We will use this information to change the methods of the trial if recruitment to the randomised trial goes slowly.
- (3) Estimate whether enough patients can be found for a full-scale randomised trial to be done to find out whether medical management or medical and surgical management of symptomatic brain cavernomas is best.

We involved people with cavernoma, carers, and representatives of CAUK with patients and carers on 6 July 2019: all approved the design of the project and the extent of patient and public involvement. The focus group wanted the trials to be as inclusive of patients as possible. The focus group recognised how the project would benefit from them contributing their 'lived experience' of brain cavernoma.

People with cavernoma, carers, and representatives of CAUK will also keep an eye on the research by forming an advisory group and meeting regularly to discuss the research. Two representatives of this group will join and advise the steering committee.

We will publish our findings in medical journals. We will work with CAUK to produce a plain English summary and circulate it to patients via newsletters, email, the web, and social media.

# 1 INTRODUCTION

## 1.1 BACKGROUND

### 1.1.1 What are brain cavernomas?

Cerebral cavernous malformations or 'cavernomas' are intracranial vascular malformations that are diagnosed using histopathological examination or magnetic resonance imaging (MRI). Although most cavernomas are solitary and sporadic, around one-fifth are multiple with autosomal dominant inheritance due to mutations in three genes (1), so there are implications for relatives as well.

Large brain MRI cohorts have shown that the asymptomatic prevalence of brain cavernomas is 0.16%, currently affecting ~106,000 people in the UK (2). Some of these people present to medical attention with symptoms such as epileptic seizures or stroke due to either intracranial haemorrhage or 'focal neurological deficits' anatomically related to the cavernoma that do not appear to be due to haemorrhage (3). The incidence of symptomatic cavernoma in the UK was 0.24 per 100,000 per year at the turn of the millennium (4), so approximately 160 people are newly-diagnosed with symptomatic cavernoma in the UK annually. The impact of cavernoma is disproportionately high in comparison to their frequency, because they are usually diagnosed in children and young adults of working age (4).

People with cavernoma face a considerable risk of recurrent stroke due to intracranial haemorrhage, which is reliably known over five years after diagnosis (5), but is likely to continue for their lifetime. The 5-year risk of intracranial haemorrhage ranges from ~3.8% for people with non-brainstem cavernoma who have presented without a stroke to ~30.8% for people with brainstem cavernoma who have presented with stroke due to intracranial haemorrhage or focal neurological deficit.

People with cavernoma who present with an epileptic seizure almost inevitably develop epilepsy within one year, and only half of people with cavernoma-related epilepsy achieve two-year seizure-freedom (6).

These persistent symptoms also cause economic consequences for people with cavernoma, carers, the NHS, social services, and lost productivity in the UK workforce (7).

### 1.1.2 What treatments are available in standard clinical practice for brain cavernoma?

'Medical management' constitutes standard medical care alone (e.g. prevention of epileptic seizures with anti-epileptic drugs, and rehabilitation of neurological deficits, according to UK guidelines (8)). This is the most frequently used management plan for people with brain cavernoma in the UK (9).

Surgical management of brain cavernoma with neurosurgical excision or stereotactic radiosurgery is used in standard clinical practice for some patients to try to prevent recurrent epileptic seizures and stroke due to intracranial haemorrhage or non-haemorrhagic focal neurological deficit, which can result in death, disability,

1  
2 handicap, and psychological consequences for patients and carers (10). Surgical  
3 management is given in addition to medical management in standard clinical  
4 practice, as described above, so throughout this protocol we will refer to this as  
5 'medical and surgical management' for clarity.  
6

7 Medical and surgical management in the CARE pilot trial involves health  
8 technologies that are available in standard clinical practice in the UK and Republic of  
9 Ireland; these are either neurosurgical excision (performed by neurosurgeons at 37  
10 regional adult or paediatric neuroscience centres) or stereotactic radiosurgery (using  
11 Gamma Knife performed at the National Centre for Stereotactic Radiosurgery in  
12 Sheffield or the Queen Square Radiosurgery Centre). Neurosurgical excision is the  
13 most frequently-used form of surgical treatment for brain cavernoma in the UK, but it  
14 involves a craniotomy and the risk of complications is much higher for some  
15 cavernomas deep within the brain or brainstem that cannot be accessed without  
16 traversing brain tissue with important functions. Stereotactic radiosurgery (using  
17 Gamma Knife) is non-invasive and may be used because neurosurgery is too risky or  
18 a patient wants a non-invasive treatment. There are some emerging technologies for  
19 the surgical treatment of brain cavernomas, including minimally invasive therapeutic  
20 approaches for brain cavernoma such as magnetic resonance thermography-guided  
21 laser interstitial thermal therapy, or stereotactic laser ablation (11). Although medical  
22 and surgical management in the CARE pilot trial will continue to be neurosurgical  
23 excision or Gamma Knife stereotactic radiosurgery plus medical management, we  
24 will collect details of each type of surgical treatment used after randomisation to allow  
25 us to quantify the use of emerging technologies.  
26  
27

28 Medical and surgical management can have complications that can be fatal or  
29 disabling (9; 12; 13), and there are few reliable data about the benefits and risks of  
30 medical management versus medical and surgical management (8; 14; 15), so most  
31 patients have medical management (9).  
32

33 Although drugs like propranolol, antiplatelet agents, anticoagulant agents and statins  
34 are not licensed for the treatment of brain cavernoma, some clinicians may use them  
35 off-label for patients who are unsuitable for medical and surgical management  
36 because these drugs may have disease-modifying effects (16).  
37  
38

### 39 **1.1.3 What evidence supports medical management vs. medical and surgical** 40 **management of brain cavernoma?** 41

42  
43 A search of ClinicalTrials.gov trial register on 17 November 2020 using the terms,  
44 "cavernoma OR cavernous angioma OR cavernous malformation" revealed five  
45 RCTs of drug therapies for brain cavernoma, but no completed, ongoing, or planned  
46 RCTs comparing medical management with medical and surgical management.  
47

48 In several systematic reviews of observational cohort studies comparing medical  
49 management to medical and surgical management of brain cavernoma, or one form  
50 of surgical management to another, there were no studies at low risk of bias that  
51 demonstrated sufficiently "dramatic" associations between medical management  
52 versus medical and surgical management of brain cavernoma and clinical outcomes  
53 that would make a RCT unnecessary (14; 17).  
54

55 We performed or updated (to 2018-2019) several systematic reviews and meta-  
56 analyses including:  
57

- 58 i. observational cohort studies that compared medical and surgical  
59 management involving stereotactic radiosurgery or neurosurgery against  
60 medical management in a concurrent or historical control group and reported  
clinical outcome (14; 18)

- 1
  - 2
  - 3
  - 4
  - 5
  - 6
  - 7
  - 8
  - 9
  - 10
  - 11
  - 12
  - 13
  - 14
  - 15
  - 16
  - 17
  - 18
  - 19
  - 20
  - 21
  - 22
  - 23
  - 24
  - 25
  - 26
  - 27
  - 28
  - 29
  - 30
  - 31
  - 32
  - 33
  - 34
  - 35
  - 36
  - 37
  - 38
  - 39
  - 40
  - 41
  - 42
  - 43
  - 44
  - 45
  - 46
  - 47
  - 48
  - 49
  - 50
  - 51
  - 52
  - 53
  - 54
  - 55
  - 56
  - 57
  - 58
  - 59
  - 60
- ii. observational cohort studies without comparison groups reporting clinical outcomes after either medical management (5), neurosurgery (9; 19), or stereotactic radiosurgery (18; 19); and
  - iii. decision analysis comparing all management strategies using a Markov model with a time horizon of five years (20)

The best available evidence from observational studies comparing medical management with medical and surgical management is summarised in a table (see 1.1.4 below) and in more detail in the following paragraphs.

#### 1.1.3.1 Neurosurgery versus medical management

There are seven observational cohort studies that compare neurosurgery and medical management (9; 21; 22; 23; 24; 25; 26). The best available comparative data on an entire incident brain cavernoma population found neurosurgery to be associated with harm over five years (hazard ratios 2.2-3.6) (9), although other comparative studies restricted to brainstem/deep cavernomas have suggested both harm (risk ratios 1.9-7.8) and benefit (risk ratios 0.5-0.6) on the risk of intracranial haemorrhage over 4-6 years (21; 22; 23; 24), but the long-term difference in risk is unknown and might favour neurosurgery.

#### 1.1.3.2 Stereotactic radiosurgery versus medical management

In the only observational cohort study comparing stereotactic radiosurgery with medical management at one hospital in Korea (27) (see table below), stereotactic radiosurgery might have been harmful, but the risk ratio was incalculable because of the paucity of outcomes. Indirect comparisons imply that stereotactic radiosurgery might be superior to medical management over five years. In a systematic review and meta-analysis of 30 cohort studies of patients undergoing stereotactic radiosurgery for brain cavernoma (median 61% of whom had brainstem cavernoma and median 91% of whom had presented with intracranial haemorrhage), during a median follow-up of 48 (IQR 35-62) months after stereotactic radiosurgery, the annual incidence of the composite of death, intracranial haemorrhage or focal neurological deficit was 3.6% (95% CI 3.17-4.16) (18). Using these data to estimate the five-year risk (16.9%) after stereotactic radiosurgery and comparing the risk indirectly to the cumulative 5-year risks of intracranial haemorrhage with medical management that range from ~18% to ~31% for comparable patient groups (5), suggests that stereotactic radiosurgery might be superior to medical management over five years. A systematic review of stereotactic radiosurgery restricted to brainstem cavernoma suggested that treatment was beneficial by comparing intracranial haemorrhage risks before and after treatment (13), but their findings are unreliable because they may simply reflect the untreated clinical course of brain cavernoma in which intracranial haemorrhage risk declines over time (5).

Our summary of the procedures, benefits and risks for patients and carers is also summarised in a table (see 1.1.5 below).

### 1.1.4 Observational studies comparing medical management with medical and surgical management for brain cavernoma.

| Study                                                   | Population                                                        | Intervention                                 | Comparator                 | Outcomes / Time                                                                                         | Medical vs. medical and                                                                                                     |
|---------------------------------------------------------|-------------------------------------------------------------------|----------------------------------------------|----------------------------|---------------------------------------------------------------------------------------------------------|-----------------------------------------------------------------------------------------------------------------------------|
|                                                         |                                                                   | Medical management                           |                            | Medical and surgical management                                                                         | absolute &/or relative risk(s) of ICH                                                                                       |
| <b>Neurosurgery vs. medical management</b>              |                                                                   |                                              |                            |                                                                                                         |                                                                                                                             |
| <i>Brain cavernomas in any location</i>                 |                                                                   |                                              |                            |                                                                                                         |                                                                                                                             |
| Moultrie <i>et al.</i> 2014 (9)                         | 134 adults (40 had caused ICH/FND)                                | Surgery (n=25)                               | Medical management (n=109) | Functional outcome (at least 2 successive ratings of >1 on the mRS), or new ICH/FND during 5y follow-up | Functional outcome: 13/25 vs. 40/109<br>(aHR 2.2, 95% CI 1.1–4.3)<br>ICH/FND: 8/25 vs. 17/109<br>(aHR 3.6, 95% CI 1.3–10.0) |
| Kida <i>et al.</i> 2015 (25)                            | 78 adults (53 had caused ICH)                                     | Surgery (n=29)                               | Medical management (n=49)  | ICH during 3.8–4.6y follow-up                                                                           | 2/29 vs. 16/49<br>(RR 0.6, 95% CI 0.1–2.6)                                                                                  |
| <i>Brainstem/deep cavernomas</i>                        |                                                                   |                                              |                            |                                                                                                         |                                                                                                                             |
| Esposito <i>et al.</i> 2003 (20)                        | 30 adults (26 had caused ICH/FND)                                 | Surgery (n=13)                               | Medical management (n=17)  | ICH/FND over average 3.9y                                                                               | 6/13 vs. 1/17<br>(RR 7.8, 95% CI 1.1–57.4)                                                                                  |
| Mathiesen <i>et al.</i> 2003 (21)                       | 68 adults (48 had caused ICH/FND)                                 | Surgery (n=29)                               | Medical management (n=34)  | ICH over average 4.6y                                                                                   | 4/29 vs. 8/34<br>(RR 0.6, 95% CI 0.2–1.7)                                                                                   |
| Tarnaris <i>et al.</i> 2008 (22)                        | 21 adults (17 had caused ICH/FND)                                 | Surgery (n=6)                                | Medical management (n=15)  | ICH over average 6.5y                                                                                   | 3/6 vs. 4/15<br>(RR 1.9, 95% CI 0.6–6.0)                                                                                    |
| Huang <i>et al.</i> 2010 (23)                           | 30 adults (30 had caused ICH/FND)                                 | Surgery (n=22)                               | Medical management (n=8)   | “Deterioration” over average 4y                                                                         | 3/22 vs. 2/8<br>(RR 0.5, 95% CI 0.1–2.7)                                                                                    |
| <i>Brain cavernomas not in brainstem/deep locations</i> |                                                                   |                                              |                            |                                                                                                         |                                                                                                                             |
| Kivelev <i>et al.</i> 2009 (24)                         | 33 adults (15 had caused ICH)                                     | Surgery (n=18)                               | Medical management (n=15)  | ICH over average 7.7y                                                                                   | 0/18 vs. 4/15<br>(RR incalculable)                                                                                          |
| <b>Stereotactic radiosurgery vs. medical management</b> |                                                                   |                                              |                            |                                                                                                         |                                                                                                                             |
| Yoon <i>et al.</i> 1998 (26)                            | 41 adults with cavernomas in any location (20 had caused ICH/FND) | Gamma Knife stereotactic radiosurgery (n=22) | Medical management (n=19)  | ICH, adverse radiation effects (ARE) over 2–3.5y                                                        | ICH: 2/22 vs. 0/19<br>(RR incalculable)<br>ARE 5/22 vs. 0/19<br>(RR incalculable)                                           |

aHR = adjusted hazard ratio; ARE = adverse radiation effects; FND = focal neurological deficit; ICH = intracranial haemorrhage; mRS = modified Rankin Scale; RR = risk ratio (estimated from aggregate data).

|                                        |                                                                                                                                                                                                                                                                                                                                                                                                                                                                               | Neurosurgery                                                                                                                                                                                                                                                                                                                                                                                                                                   | Stereotactic radiosurgery                                                                                                                                                                                                                                                                                                                                                                                                        |
|----------------------------------------|-------------------------------------------------------------------------------------------------------------------------------------------------------------------------------------------------------------------------------------------------------------------------------------------------------------------------------------------------------------------------------------------------------------------------------------------------------------------------------|------------------------------------------------------------------------------------------------------------------------------------------------------------------------------------------------------------------------------------------------------------------------------------------------------------------------------------------------------------------------------------------------------------------------------------------------|----------------------------------------------------------------------------------------------------------------------------------------------------------------------------------------------------------------------------------------------------------------------------------------------------------------------------------------------------------------------------------------------------------------------------------|
| <b>What may be involved?</b>           | <ul style="list-style-type: none"> <li>• Treat symptoms</li> <li>• Prevent seizures</li> <li>• Rehabilitation</li> <li>• Brain scan</li> </ul>                                                                                                                                                                                                                                                                                                                                | <ul style="list-style-type: none"> <li>• Treat symptoms</li> <li>• Prevent seizures</li> <li>• Rehabilitation</li> <li>• Brain scan</li> </ul>                                                                                                                                                                                                                                                                                                 | <ul style="list-style-type: none"> <li>• Treat symptoms</li> <li>• Prevent seizures</li> <li>• Rehabilitation</li> <li>• Brain scan</li> </ul>                                                                                                                                                                                                                                                                                   |
| <b>What are the possible benefits?</b> | <ul style="list-style-type: none"> <li>• Bleed/stroke risk reduces as time passes</li> <li>• Avoids risks of neurosurgery or radiosurgery</li> </ul>                                                                                                                                                                                                                                                                                                                          | <ul style="list-style-type: none"> <li>• Risk of bleed/stroke lower if cavernoma removed</li> <li>• Less worry about symptoms returning</li> </ul>                                                                                                                                                                                                                                                                                             | <ul style="list-style-type: none"> <li>• Risk of bleed/stroke may be lower if cavernoma stabilised, but these benefits are uncertain</li> <li>• Less worry about symptoms returning</li> </ul>                                                                                                                                                                                                                                   |
| <b>What are the possible risks?</b>    | <ul style="list-style-type: none"> <li>• Future bleed/stroke due to cavernoma <ul style="list-style-type: none"> <li>○ Can be mild</li> <li>○ May be disabling</li> <li>○ Rarely be fatal</li> <li>○ Risk higher for cavernoma in brainstem</li> </ul> </li> <li>• Epileptic seizures, which may be difficult to control</li> <li>• Cavernoma remains in the brain, so the risks of stroke and seizure may never go away</li> <li>• Worry about symptoms returning</li> </ul> | <ul style="list-style-type: none"> <li>• Bleed/stroke due to neurosurgery <ul style="list-style-type: none"> <li>○ Can be mild</li> <li>○ May be disabling</li> <li>○ Rarely be fatal</li> <li>○ Risk higher for cavernoma in brainstem</li> </ul> </li> <li>• Epileptic seizures may not go away</li> <li>• Complications of treatment (e.g. infection or damage to brain around the cavernoma)</li> <li>• Cavernoma may come back</li> </ul> | <ul style="list-style-type: none"> <li>• Bleed/stroke despite radiosurgery <ul style="list-style-type: none"> <li>○ Can be mild</li> <li>○ May be disabling</li> <li>○ Rarely be fatal</li> <li>○ Risk higher for cavernoma in brainstem</li> </ul> </li> <li>• Epileptic seizures may not go away</li> <li>• Complications of treatment (e.g. damage to brain around the cavernoma)</li> <li>• Cavernoma not removed</li> </ul> |

### 1.1.5 Summary of procedures, benefits and risks with medical management or medical and surgical management for brain cavernoma

## 1.2 RATIONALE FOR STUDY

### 1.2.1 The therapeutic dilemma

The shortage of high-quality evidence to inform the management of patients with brain cavernomas has prevented clinical guidelines in the UK and USA from making strong recommendations about whether to use medical management or medical and surgical management for brain cavernomas (8; 15). These uncertainties were confirmed by patients and carers in a James Lind Alliance Priority Setting Partnership in the UK, which found that the top research priority for cavernoma was, “Does treatment (with neurosurgery or stereotactic radiosurgery) or no treatment improve outcome for people diagnosed with brain or spine cavernoma?” (28).

Therefore, in 2018 the NIHR HTA commissioned research to address the question, “How effective is treatment (with neurosurgery or stereotactic radiosurgery) versus conservative management in people with symptomatic brain cavernoma?” The NIHR’s commissioning brief reported that feedback from experts suggested that a randomised controlled trial (RCT) with at least 10 years of follow-up would be needed to better guide clinical care and that it would be necessary to conduct a multinational trial in countries with similar healthcare settings to the UK to ensure sufficient numbers for a robust trial.

### 1.2.2 Understanding recruitment barriers with a QuinteT recruitment intervention (QRI)

Resolving this therapeutic dilemma is likely to be challenging because of the low incidence of symptomatic brain cavernoma despite a high prevalence, because the availability of surgical management varies in everyday clinical practice (8; 15), and because accumulated expertise in specialist centres has guided clinical practice hitherto despite the lack of high quality evidence (29). Recruitment to the CARE pilot trial is likely to remain challenging given the history of RCTs comparing medical management versus medical and surgical management of intracranial vascular malformations with invasive procedures (30; 31). The reasons for poor recruitment to such trials have not been studied, so qualitative research is needed to investigate the potential barriers to recruitment and optimise recruitment processes in the CARE pilot trial. Many RCTs experience recruitment challenges due to difficulties that recruiters have in explaining concepts like uncertainty, equipoise and randomisation (32). Discussions with members of our collaboration during the development of this proposal have raised concerns about clinical equipoise amongst neurosurgeons, partly due to treatment preferences according to the anatomical location of the brain cavernoma, concerns about exposing children to radiation, scepticism about the effects of stereotactic radiosurgery, and the availability of stereotactic radiosurgery in the NHS for brain cavernoma at only two sites in the UK (although patients may be referred from any hospital) (29). Also, patients may have treatment preferences (e.g. for less invasive procedures), and patient/family preferences may affect RCTs involving children in particular (33).

An integrated QRI aims to understand recruitment barriers (e.g. related to selection of patients during screening and recruitment processes, or equipoise, etc.) and optimise informed consent and recruitment processes in the CARE pilot trial (32; 33; 34). Embedding a QRI allows the identification and understanding of generic and trial-specific recruitment challenges (35; 36; 37), and enables the development of tailored plans to address these issues. A QRI (38) has been integrated into over 30



1  
2 RCTs, including trials comparing surgery and medical management (39) and there is  
3 observational evidence of the benefits associated with a QRI in at least five RCTs  
4 (40).  
5  
6

### 7 **1.2.3 This feasibility study and pilot trial will inform the feasibility of a** 8 **definitive main phase trial** 9

10 The NIHR HTA commissioned a UK feasibility study and pilot phase RCT to  
11 demonstrate the ability to recruit enough patients to answer the research questions  
12 and sufficient numbers in the UK such that the trial results would be applicable to the  
13 NHS. The CARE pilot trial was funded by this NIHR HTA commissioned call. A  
14 decision about whether to proceed a definitive main phase trial will be made in light  
15 of the results of the CARE pilot trial.  
16  
17

### 18 **1.2.4 Patient, carer and public involvement (PCPI)** 19

20 Between August 2014 and November 2015 we worked with people with cavernoma,  
21 carers, and representatives of the patient support organisation Cavernoma Alliance  
22 UK (CAUK) on the Steering Group of the James Lind Alliance Priority Setting  
23 Partnership that identified and prioritised the topic of this application as the top  
24 priority for further research into cavernoma. Since November 2015, individuals in the  
25 Steering Group of the James Lind Alliance Priority Setting Partnership – including  
26 patients and carers – were involved in reviewing the commissioning brief for the  
27 NIHR HTA commissioned call for research. In May-June 2016, we worked with  
28 CAUK to gather the views of patients and carers who are members of the  
29 organisation, about research to address this top priority for further research into  
30 cavernoma. We consulted 731 CAUK members affected by cavernoma or  
31 parents/guardians of affected children, by emailing them a link to a web-based  
32 survey describing the CARE trial. 70% of respondents had not received surgical  
33 management for a cavernoma and a minority (28%) of these respondents indicated  
34 that they would not participate in the RCTs proposed. Between December 2018 and  
35 June 2019, we consulted representatives and members of CAUK, including patients  
36 with the condition, who have reviewed and shaped the design of the CARE pilot trial.  
37 In July 2019, all members of CAUK were invited by the Chief Executive of the  
38 organisation to participate in a focus group on 6th July. Four carers, six patients, the  
39 Chief Executive Officer of CAUK and the Chief Investigator (CI) attended the  
40 meeting. This focus group of patients, carers, and family members considered the  
41 overall design of this project. The main themes of the discussion were: (1) The group  
42 recognised that, "many people have had to make difficult decisions without the  
43 information they need" and that in addressing this "difficult dilemma", their  
44 involvement could improve participation by contributing their 'lived experience' of  
45 brain cavernoma to the clinical experience of the co-applicants and the planned  
46 qualitative research; (2) The group approved the extent of the patient and public  
47 involvement that is planned; (3) The group wanted the CARE pilot trial to be as  
48 inclusive of patients as possible. In particular, they wanted the CARE pilot trial to  
49 include patients who have: (a) first presented with symptoms or been diagnosed  
50 some time ago, (b) multiple cavernomas (one of which might have been treated), and  
51 (c) partially treated cavernoma (for whom there is uncertainty about further  
52 treatment); (4) All participants approved the project's design. In particular, they  
53 approved a choice of the safest treatment according to cavernoma location, using the  
54 "wealth of experience" of the clinical community in the UK, permitting patient  
55 preferences, and allowing treatment if needed during follow-up; (5) The group  
56 accepted that participants would receive standard care; (6) The group asked not only  
57 that the project should include a diverse sample of patients with brain cavernoma, but  
58  
59  
60

also that the analyses should account for this diversity (e.g. age, time since symptoms, single vs. multiple cavernoma, and genetic mutations).

## 2 STUDY OBJECTIVES

### 2.1 OBJECTIVES

#### 2.1.1 Primary objective

Assess the feasibility of performing a definitive main phase of a RCT comparing medical management to medical and surgical management (with neurosurgery or stereotactic radiosurgery) for improving outcome for people with symptomatic brain cavernoma.

#### 2.1.2 Secondary objectives

- Set up a collaboration of the patient advocacy organisations for cavernoma in the UK and Ireland and representatives of clinical neurology, neurosurgery, and stereotactic radiosurgery at neuroscience centres throughout the UK and Ireland.
- Evaluate screening logs and conduct qualitative research with patients and clinicians to understand recruitment processes and barriers, as well as actions to address any barriers, as part of a QuinteT recruitment intervention (QRI) to optimise informed consent and recruitment.
- Conduct the CARE pilot trial for approximately 60 patients with symptomatic brain cavernoma, comparing medical management of the brain cavernoma versus medical and surgical management (neurosurgery or Gamma Knife stereotactic radiosurgery) for improving outcome.

### 2.2 OUTCOMES

#### 2.2.1 Primary outcome

We will estimate these measures of feasibility to inform the extent to which international cooperation would be needed to recruit an adequate sample size in a CARE definitive main phase RCT, and what proportion of participants might be recruited from the UK during the study:

1. What proportion of the collaborating centres take part and recruit participants to the CARE pilot trial?
2. Can the investigators implement trial procedures correctly?
3. What proportion of screened patients is eligible?
4. What proportions of eligible patients are approached and randomised (and why are eligible patients not approached or not randomised)?
5. What is the distribution of participants between neurosurgery and stereotactic radiosurgery?
6. Do participants adhere to the allocated intervention and follow-up?
7. How complete are baseline, imaging and outcome data?
8. What are the outcome event rates?

9. How do the baseline characteristics, outcome event rates and differences between treatment groups compare to observational data about outcomes during medical management or after medical and surgical management?
10. What estimates of effect size/variability should be used in the design of the CARE definitive main phase trial?
11. What is the sample size required for a definitive trial to address the overall question over a 10-year follow-up?
12. Can the CARE pilot trial data describe care pathways, linked to health states and outcomes, to develop a robust economic model to evaluate cost effectiveness in a CARE definitive main phase trial?
13. Which international research partners in other countries could contribute to the CARE definitive main phase trial?

## 2.2.2 Primary clinical outcome

Intracranial haemorrhage or new persistent/progressive focal neurological deficit due to brain cavernoma or surgical management (neurosurgery or stereotactic radiosurgery), whether fatal (leading to death within 30 days of the outcome event) or non-fatal.

### 2.2.2.1 Intracranial haemorrhage

The definition of an intracranial haemorrhage attributable to brain cavernoma is, “a clinical event involving both acute or subacute onset symptoms (any of headache, epileptic seizure, impaired consciousness, new/worsened focal neurological deficit referable to the anatomic location of the cavernous malformation as well as radiological, pathological, surgical, or rarely only cerebrospinal fluid evidence of recent extra- or intra-lesional haemorrhage. The mere existence of a haemosiderin halo, or solely an increase in cavernoma diameter without other evidence of recent haemorrhage, are not considered to constitute haemorrhage” (3).

### 2.2.2.2 New persistent/progressive focal neurological deficit

The definition of a non-haemorrhagic focal neurological deficit attributable to brain cavernoma is, “a new or worsened focal neurological deficit referable to the anatomic location of the brain cavernoma, which may present with other clinical features of intracranial haemorrhage, but without evidence of recent blood on timely brain imaging or pathological examination, or examination of the cerebrospinal fluid. These cases may be accompanied by an increase in cavernoma diameter alone or oedema on brain MRI (3).

The definition of a focal neurological deficit (not otherwise specified) attributable to brain cavernoma is identical to non-haemorrhagic focal neurological deficit, with the exception that pathological investigation, cerebrospinal fluid examination, or timely brain imaging have not been performed at all or at the correct time to establish whether haemorrhage, oedema, or cavernoma growth underlie the clinical deterioration (3). These focal neurological deficits may be persistent (lasting >24 hours, and staying static or improving), or progressive (lasting >24 hours with further deterioration) (3).

New persistent/progressive focal neurological deficits attributable to brain cavernoma treatment may be referable to the anatomic location of the brain cavernoma (e.g. haemorrhage after neurosurgical treatment, or radionecrosis from stereotactic radiosurgery) or referable to other regions of the brain (e.g. intracranial abscess following neurosurgical excision).

### 2.2.3 Secondary clinical outcomes

During the CARE pilot trial, investigators will collect data on the risk of several clinical primary and secondary outcomes to inform the design of a main phase RCT. The following secondary clinical outcomes will be measured at each 6-month follow-up review:

1. Death not due to a primary clinical outcome
2. Liverpool Seizure Severity Scale plus epileptic seizure frequency (number of seizures in the preceding four weeks, and attainment of one-year seizure freedom)
3. Modified Rankin Scale (mRS) score
4. National Institute of Health Stroke Scale Score (adult or paediatric)
5. EQ-5D-5L in adults and EQ-5D-Y in children
6. Karnofsky Performance Status (KPS) scale in adults and Lansky Play-Performance Scale (LPPS) in children

We will also collect data to estimate health service use and healthcare and socioeconomic costs during the entire duration of follow-up.

### 2.2.4 Feasibility metrics proposed to the funder

The NIHR HTA has been provided with the following criteria for success, although these are not specific secondary outcomes of the CARE pilot trial:

- At least 30 sites in the UK and Ireland collaborate
- Project delivered according to the major milestones identified in the NIHR HTA project management plan
- Recruitment to within 10% of target
- Brain cavernoma radiographic diagnosis confirmed by expert neuroradiologist review in >95% of participants recruited
- Retention of >95% of participants at six months
- <10% treatment group switches or loss to follow-up
- QuinteT recruitment intervention is associated with an improvement in recruitment
- CARE definitive main phase trial appears feasible and affordable

## 3 STUDY DESIGN

The CARE pilot trial is a two-arm, parallel group randomised feasibility trial which aims to estimate the feasibility of performing a definitive main phase RCT comparing medical management to medical and surgical management (with neurosurgery or Gamma Knife stereotactic radiosurgery, according to their availability in clinical practice) for improving outcomes for people with symptomatic brain cavernoma. An integrated QRI aims us to understand recruitment barriers (e.g. related to selection of patients during screening and recruitment processes or equipoise), and optimise informed consent and recruitment processes in the CARE pilot trial (32; 33; 34). Participants will be recruited in secondary care settings in the UK and Ireland, from a collaborative network of research sites, with input from the patient advocacy organisation CAUK. Randomisation will allocate participants to groups in a 1:1 ratio, stratified by preferred type of surgical management, but if there is no clear preference for the type of surgical management, and both are available, the patient will be allocated to either neurosurgery or stereotactic radiosurgery (see section 3.1).

3.1 TRIAL PROFILE

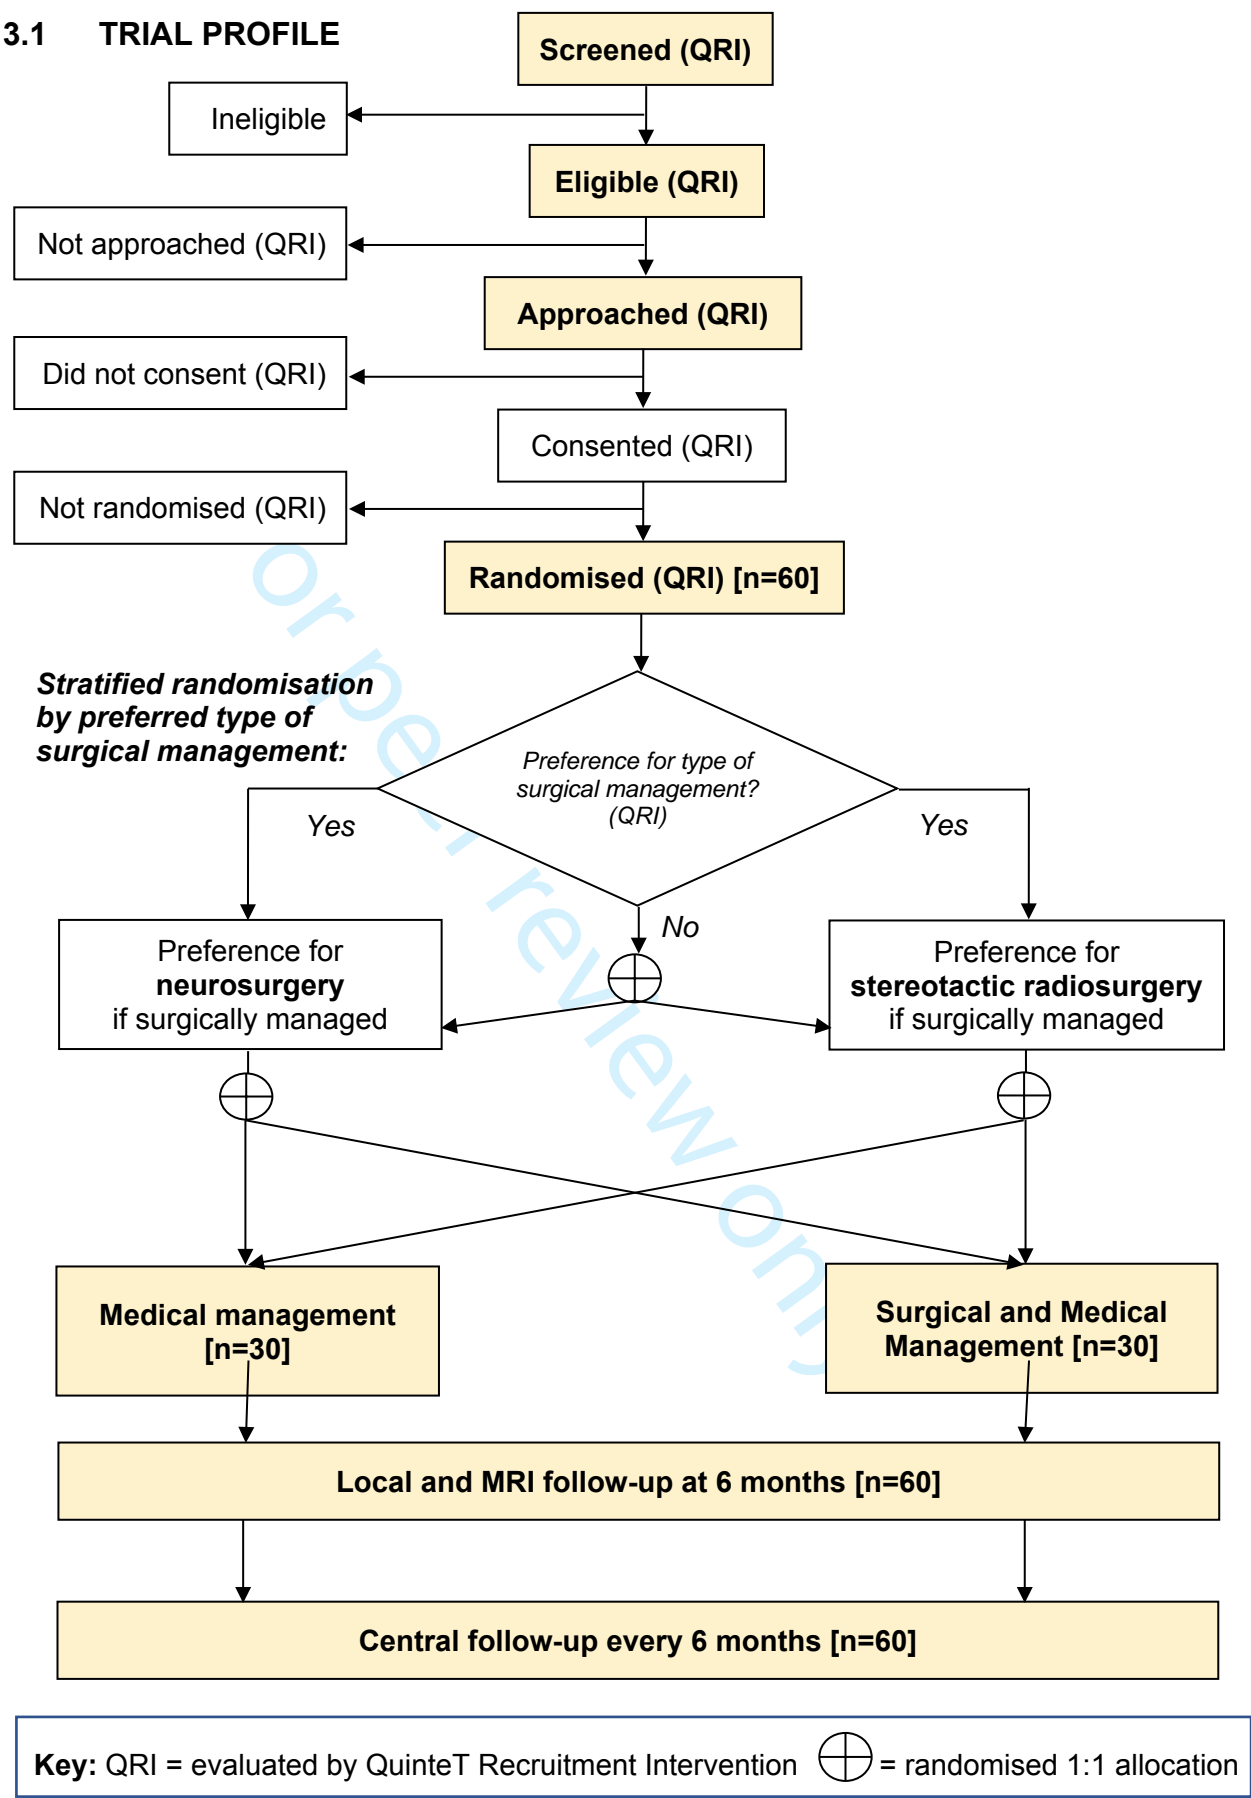

### 3.1.1 QuinteT recruitment intervention

The QuinteT recruitment intervention (QRI) has been presented as two distinct stages for clarity (data collection followed by feedback and training). In reality these are likely to overlap or run in tandem. For instance, new avenues of enquiry may emerge through feedback meetings, which can be a route to investigating recruitment difficulties in their own right. Insights into recruitment can emerge at any point during the RCT and instigate further investigations or intervention.

#### 3.1.1.1 Phase 1

##### 3.1.1.1.1 *Before the CARE pilot trial begins recruitment*

The QuinteT researcher will conduct a qualitative evaluation of what may influence recruitment during study set-up, combining evidence from previous QuinteT recruitment interventions (35; 36; 37; 38; 39; 40) and training programmes (41; 42), with data collected from patient and professional groups involved in CARE.

Qualitative work will include focus groups with healthcare professionals to explore views on eligibility and equipoise. Healthcare professionals' views will be explored in online workshops, to which we will invite relevant clinical members of the Trial Management Group (TMG), 'Consultant Cavernoma Contacts' and investigators at collaborating sites. These workshops will explore differences in views between individuals and clinical specialties regarding equipoise and identify criteria to determine patient suitability for neurosurgery or stereotactic radiosurgery, previously identified by the study team as difficult to operationalise. Discussions will also cover patient pathways into the trial, processes and management options for those declining participation, what each intervention arm involves, including potential risks and benefits, plans for follow up within the CARE pilot trial and possible advantages and disadvantages of taking part. We will organise these workshops with clinicians to maximise attendance, convenience, and efficiency by holding them virtually. The work described in this paragraph is for information only and is covered by a separate Research Ethics Committee (REC) approval (University of Bristol, Faculty of Health Sciences Research Ethics Committee Reference 111186). Qualitative work involving focus groups with healthcare professionals is therefore not covered under this protocol.

Insights into patient views to inform development of patient-facing materials, inform the design of the pathway into the trial and provide insight into the acceptability of participation in the CARE pilot trial will be obtained through the QuinteT researcher observing all CARE pilot trial Patient, carer and public involvement Advisory Group (PAG) meetings at which such issues are discussed.

A QuinteT researcher will observe all TMG and TSC meetings during which the study protocol is developed and finalised, with a focus on discussions and final presentation of equipoise and eligibility criteria.

Insights from focus groups with professionals and observation of the TMG, TSC and PAG discussions will inform the content of patient-facing information for the CARE pilot trial and site initiation visits for recruiters. The QuinteT team will provide guidance for recruiters to present CARE pilot trial information to eligible patients, carers and families during site training and initiation (see section 16.2.5.1). Guidance will raise recruiter awareness of key 'hidden' challenges when trying to recruit patients to trials comparing medical management with medical and surgical management and how these can be addressed (35; 42), as well as including insights into particular issues identified as relevant to the CARE pilot trial in how to deal with

1  
2 preferences and convey equipoise between medical management and medical and  
3 surgical management.  
4

#### 5 3.1.1.1.2 *During CARE pilot trial recruitment*

6  
7 As recruitment to the CARE pilot trial begins, recruitment processes will be  
8 investigated in-depth at study sites as they open. A QuinteT researcher will use a  
9 multi-faceted, flexible approach using triangulation of the following data to investigate  
10 site-specific or more general recruitment obstacles (34): screening logs (section 5.3);  
11 recording of recruitment consultations between recruiters and patients (section **Error!**  
12 **Reference source not found.**); in-depth interviews with members of the TMG,  
13 recruiters, and participants (section 9.4.3); review of study documents (section 9.4.5)  
14 and observation of monthly TMG meetings (section 9.4.4).  
15  
16

#### 17 3.1.1.2 Phase 2

18  
19 Findings from phase 1 will be presented to the CI and TMG. If recruitment difficulties  
20 are evident across the trial or at particular sites, the CI/TMG and QuinteT team will  
21 formulate a 'plan of action' to improve recruitment and information provision. The  
22 specific plan implemented will be grounded in the findings from analysis of the data  
23 above, with its format dependent on the nature of the recruitment barriers identified  
24 (see section 16.2.5.1).  
25  
26

## 27 4 STUDY POPULATION

### 28 4.1 NUMBER OF PARTICIPANTS

29  
30 We aim to enrol approximately 60 participants over an estimated 18 months at  
31 approximately 45 sites in the UK and Ireland. Patient follow-up will end approximately  
32 6 months after recruitment finishes.  
33  
34

### 35 4.2 INCLUSION CRITERIA

- 36  
37  
38  
39  
40  
41  
42  
43  
44  
45  
46  
47  
48  
49  
50  
51  
52  
53  
54  
55  
56  
57  
58  
59  
60
1. People of any age
  2. At least one brain cavernoma diagnosed by brain MRI that included a gradient echo or susceptibility-weighted sequence, according to standard diagnostic criteria (15; 43)
  3. Clinical history attributable to a brain cavernoma of:
    - a. Symptomatic stroke due to intracranial haemorrhage (3), or
    - b. Symptomatic stroke due to a persistent or progressive non-haemorrhagic, or not otherwise specified, focal neurological deficit (3), or
    - c. Epileptic seizure(s) meeting the definition of definite or probable cavernoma-related epilepsy (44)
  4. Patient and doctor are uncertain about medical management or medical and surgical management of the symptomatic brain cavernoma, following consultation with a neurosurgeon
  5. Patient has mental capacity to consent for themselves (adult participants or paediatric participants with capacity) or parent/legal guardian provides consent (paediatric participants).

There is no upper time limit on when a patient may be recruited following the symptomatic presentation and diagnosis of a brain cavernoma.

Patients with multiple brain cavernomas, at least one of which has been symptomatic and not undergone removal/obliteration by surgical management, may be included.

In the case of prior surgical management (with neurosurgery or stereotactic radiosurgery), patients with a symptomatic brain cavernoma that has not been completely removed/obliterated by prior surgical management may be included.

### 4.3 EXCLUSION CRITERIA

1. Surgical management of a solitary symptomatic brain cavernoma with MRI evidence of cavernoma removal/obliteration
2. Spinal cavernoma alone, without symptomatic brain cavernoma
3. Asymptomatic brain cavernoma. Patients with radiographic cavernoma enlargement (with or without intralesional haemorrhage) but without new symptoms are still regarded as asymptomatic.
4. Previously randomised in the CARE pilot trial

### 4.4 CO-ENROLMENT

Inclusion in another RCT or observational study does not preclude participation in the CARE pilot trial as long as: participants are not overburdened; their inclusion would be unlikely to confound the CARE pilot trial's results or complicate attribution of serious adverse events and outcomes; the protocol of the other study does not preclude co-enrolment in the CARE pilot trial; and co-enrolment has been agreed with the Chief Investigators of all studies involved in co-enrolment. Research staff should obtain permission to enrol patients who are participants in other trials from the CI. A record of participants who are known to have been co-enrolled in other studies will be maintained by the TCC.

## 5 PARTICIPANT SELECTION AND ENROLMENT

### 5.1 IDENTIFYING AND SCREENING PARTICIPANTS

For a patient to be eligible for the trial, the patient and doctor must be uncertain about medical management or medical and surgical management of the symptomatic brain cavernoma. In standard clinical practice, decisions about medical management or medical and surgical management of symptomatic brain cavernomas are usually made with patients and neurologists or neurosurgeons, following discussions at multi-disciplinary meetings that may involve any or all of neurologists, neurosurgeons, stroke physicians, and radiologists. We expect uncertainty about medical management or medical and surgical management to be established during discussion between a patient and their doctor. In clinical practice, multidisciplinary meetings involving neurologists and neurosurgeons may confirm this uncertainty as well as suitability for either type of surgical management; sometimes, these multidisciplinary meetings manage this uncertainty by arriving at a consensus opinion, but investigators should note that this may make recruitment to the CARE pilot trial less likely.



The principal investigator (PI), or another clinician with delegated responsibility, is responsible for confirming eligibility for the trial, however delegated research team members can identify eligible patients. Research team members delegated this role should be members of, or affiliated to, the clinical care team. These people may identify potentially eligible patients using several sources at their site, including but not limited to data on admissions, outpatient appointments, referrals, and brain imaging that record:

- New diagnoses of symptomatic brain cavernoma made in everyday clinical practice during the recruitment period.
- Diagnoses of symptomatic brain cavernoma made at any time before the recruitment period, identified by searches of clinical or imaging databases, or clinicians' own records.
- Referrals from colleagues at other hospitals in the UK and Ireland.

Verification of eligibility will require delegated research staff to access patient medical notes.

The TMG will apply to use the Association of British Neurologists' Rare Diseases Ascertainment and Recruitment platform (RaDAR; <https://www.theabn.org/general/custom.asp?page=radar>), which is used by neurologists to indicate that they have seen a patient with a specified rare neurological disease (such as brain cavernoma). Once a neurologist notifies RaDAR that they have seen a patient, the neurologist will be sent the patient information leaflet about the trial to send to the patient, who can be referred to their local trial site if they are interested in discussing participation.

CAUK (and affiliated groups such as Cavernoma Ireland and Cavernoma Scotland) will share information about the trial through their website, social media platforms and any other communications channels used by them. Patients who contact, or are members of, one of the patient support organisations will be made aware of the CARE pilot trial and informed about what the CARE pilot trial involves by a CAUK member of staff. If these patients are interested in finding out more and being screened for their eligibility, CAUK may direct them to information about a Consultant Cavernoma Contact at an appropriate CARE pilot trial site. The role of CAUK will be provision of information to patients; patients will be advised to speak with their clinician about decisions related to their medical care. CAUK will record the number of patients who they identify as potentially suitable for the CARE pilot trial and suggest referral to a Consultant Cavernoma Contact.

The CI and other members of the TMG will raise awareness of the trial amongst the clinical community through presentations at conferences and meetings. This could result in referral of patients to CARE pilot trial recruitment sites from other hospitals in the UK and Ireland.

## 5.2 APPROACHING AND CONSENTING PARTICIPANTS

Patients in the UK and Ireland will be approached and invited to take part in adult and paediatric neurology, neurosurgery, and stroke services in secondary care, or one of the stereotactic radiosurgery services that are commissioned to provide stereotactic radiosurgery for cavernoma (29). Eligibility may have been determined by a multidisciplinary discussion, but eligible patients should be approached for recruitment to the CARE pilot trial during or after consultation with a specialist in the type of treatment that is thought to be most effective for the surgical management of the brain cavernoma. Delegated research staff involved in approaching eligible patients should be members of, or affiliated to, the clinical care team.

Potential adult participants or the parent/guardians of potential paediatric participants may be approached in person or by telephone (or another technology that supports remote consultations e.g. NHS Near Me). An invite letter may be sent in advance of approaching the patient. The short and supplementary PIL will be used to introduce and discuss the trial.

There is no specific time window for approaching eligible patients for their consent (see section 4.2 above), but they should be approached whenever uncertainty arises about whether to pursue medical management or medical and surgical management of a symptomatic brain cavernoma. The oral explanation given should be performed by the PI or another member of the research team delegated to perform this task and must cover all the elements specified in the relevant PIL and ICF. The patient or the parent/guardian will be given as much time as they require to consider the study information and given every opportunity to ask questions.

The PI or another clinician with delegated responsibility, is responsible for confirming eligibility for the trial, ensuring informed consent is obtained and that the informed consent form (ICF) is signed and dated by all parties before randomisation and any protocol-specific procedures are carried out. Local research staff should follow the laws that govern consent procedures in their jurisdiction. Members of the research team will have undergone standardised training on trial-related procedures. Health Research Authority guidance on applying a proportionate approach to seeking consent has been followed (45). Adult patients lacking mental capacity to consent for themselves will not be included in this trial (see section 4.2). If an adult patient loses mental capacity during the course of the research and subsequently regains mental capacity, their consent to continue taking part in the trial will be confirmed.

Face to face informed consent discussions with potential participants may not be feasible (e.g. due to the COVID-19 pandemic). In order to avoid patients making additional trips to hospital, written informed consent may be recorded in the following ways (in addition to being done in person):

1. Remotely

When completed remotely, the patient should return the signed form, or a scan or legible photograph of all sections of it, to a research team member at the recruiting site by email, by post or in person..

2. Electronically (using an online form)

The following options may be employed to complete consent electronically:

- The consent form may be completed and signed electronically where an approved mechanism is available such as DocuSign.
- An electronic consent form, generated via the trial database. Participants providing consent using the online form will be required to enter a typewritten signature.

In both cases, the form should be countersigned by the research team member taking consent. There is no requirement that the counter-signature date match the date of the participant signature but the counter-signatory must be satisfied that the consent is genuine.

Regardless of the method of consent, patients or parent/guardians will be provided with information in-person, by post or by email to consider before providing consent.

The information will be discussed with the patient or parent/guardian as outlined above.

Confirmation of eligibility, consent, and the version of the PILs used should be recorded in the participant's paper and/or electronic medical records for any future source data verification, including the date of consent (and child's assent if relevant), that the participant received the PILs, who obtained consent, and signed and dated confirmation that the patient was eligible for enrolment.

Patients will be given the opportunity to consent to any or all of the following:

- Consent to recording their recruitment consultation(s) to inform the QuinteT recruitment intervention
- Consent to taking part in an interview to inform the QuinteT recruitment intervention
- Consent to participate in the CARE pilot trial

### 5.2.1 Consent to the QRI

All eligible patients who are approached to take part will be invited to take part in an interview with the qualitative researcher about their experiences of being invited to join the CARE pilot trial.

Some study centres will also be involved in audio-recording conversations where the CARE pilot trial is discussed (including conversations held in person and by remote methods). In study centres selected to participate in collecting audio-recordings, eligible patients will be invited to consent to these conversations being audio-recorded, before discussion of the CARE pilot trial begins. Information on the rationale and process for recording recruitment discussions is covered in the relevant CARE PIL. Missed recordings of recruitment conversations are not required to be recorded as protocol deviations.

Participants will be given sufficient time to consider whether they wish to take part in the QRI. Participants will only be consented if they and the local research team feel they have had enough time to consider and ask questions about the QRI. Consent to take part will be documented on the relevant verbal and/or written consent forms. Written consent to audio-recordings will cover all future recruitment discussions. Patient participation in both interviews and audio-recordings is optional. If written consent to record conversations is given, the recordings will be transferred to the University of Bristol for analysis (see section 10.3.1). If no written consent form is received, all recordings for that participant will be deleted, no further recordings will be made and no invitation to interview extended.

### 5.2.2 Consent to participate in the CARE pilot trial

#### 5.2.2.1 Adults

The participant will be asked to complete a consent form. The research team member and the participant should each sign and date the ICF to confirm that consent has been obtained. Written informed consent should always be sought from the participant where possible. If this is not possible because the participant cannot write, the member of the research team can gain witnessed verbal consent. The participant should receive a copy of the completed ICF, a copy should be filed in the patient's medical records and the original ICF should be filed in the investigator site file (ISF) along with the randomisation form. The participant should also receive a copy of the current PIL.

### 5.2.2.2 Children

Children's PILs are available for children 0-5 years old, 6-10 years old and 11-16 years old. Children aged 6-10 and 11-15 who are capable of understanding it will be given the option of providing assent.

The parent/guardian should receive a copy of the current parent/guardian short and supplementary PIL and appropriate children's PIL. If the parent/guardian wishes for the child to participate in the CARE pilot trial, then they will be asked to sign the ICF. Both the parent/guardian and the person delegated to take consent will each sign and date the ICF. The parent/guardian should receive a copy of the fully completed ICF, a copy should be filed in the patient's medical records and the original ICF should be filed in the investigator site file (ISF) along with the randomisation form. The same would apply in the case of assent being given.

#### 5.2.2.2.1 *Children and young people in England, Wales and Northern Ireland*

Health Research Authority (HRA) guidance states (46):

- "There is no statute in England, Wales or Northern Ireland governing a child's right to consent to take part in research other than a Clinical Trial of an Investigational Medicinal Product (CTIMP), i.e. consent for non-CTIMPs. However common law presumes that young people aged between 16 and 18 are usually competent to give consent to treatment."
- "Case law suggests that if a young person has sufficient understanding and intelligence to understand fully what is proposed, and can use and weigh this information in reaching a decision (i.e. they are 'Gillick competent'), he or she can give consent to treatment."
- "In the absence of law relating specifically to research, it is commonly assumed that the principle of 'Gillick competence' can be applied not only to consent for treatment, but also to consent for research."
- "When a young person is believed to be competent, consent from those with parental responsibility is not legally necessary. However, the involvement of parents in decision-making is encouraged in most circumstances."
- "When a child or young person is not competent, the Children Act and the Children Act (Northern Ireland) Order permits parents (and those with parental responsibility) to consent to medical treatment on their behalf. Consent of only one parent is required."

#### 5.2.2.2.2 *Children and young people in Scotland*

Health Research Authority (HRA) guidance states (47):

- "There is no specific provision in Scots law governing a child's right to consent to take part in research, other than a Clinical Trial of an Investigational Medicinal Product (CTIMP), i.e. consent for non-CTIMPs."
- In the case of medical treatment, "young people aged 16 and over are deemed to be competent to give consent for medical treatment unless proven otherwise. Children and young people under 16 have a statutory right to give consent to surgical, medical or dental procedures or treatments if they are deemed, by a medical practitioner, to be competent to do so."
- "It is commonly accepted that we can extrapolate a child / young person's right to give consent for treatment, to give them the right to give consent to

1  
2 take part in non-CTIMP research. It is commonly assumed that they also have  
3 a legal right to object to participation.”

- 4  
5 • “The Children (Scotland) Act permits parents (or those with parental  
6 responsibility) to give consent on behalf of a young person under 16 who is  
7 not competent. Consent of only one parent is required.”

8  
9 The above guidance will be followed for this trial in relation to participants in Scotland  
10 under the age of 16.

#### 11 12 5.2.2.2.3 *Children and young people in the Republic of Ireland*

13  
14 Consent will be obtained in line with ICH-GCP and all applicable laws and  
15 regulations. In line with the HSE National Consent Policy, consent to a child’s  
16 participation in a study must be obtained from a parent/legal guardian for all  
17 paediatric participants under 18 years old (48). Whenever the child has sufficient  
18 competence to provide it, a child’s assent must be sought in a child-appropriate  
19 manner.  
20

#### 21 22 5.2.2.2.4 *Re-consenting paediatric patients*

23  
24 When a child recruited into the trial reaches the age of 16 years (or 18 years old in  
25 the Republic of Ireland) and is therefore deemed competent to provide consent, they  
26 should be re-consented if still willing to participate at their next 6-month follow up  
27 review. No further data will be collected until a signed consent form has been  
28 received.  
29

### 30 31 5.2.3 **Consent to be contacted for an interview exploring reasons for declining 32 participation**

33  
34 Patients or their parents/carers who decline participation in the CARE pilot trial will be  
35 invited to consent to take part in an interview with the QRI researcher, exploring their  
36 experiences of being approached and invited to take part in the study. Where  
37 parents/carers consent to take part in an interview, it will be acceptable for the  
38 child/young person to attend and contribute if they choose.  
39  
40

## 41 42 5.3 **SCREENING AND ENROLMENT LOGS**

43  
44 Research teams at each site will use screening logs to record non-identifying  
45 demographic and clinical details of patients who are screened, including: initials, age  
46 (years), sex, brain cavernoma diagnosis (yes vs. no), brain cavernoma location  
47 (brainstem vs. other), type of brain cavernoma presentation (symptomatic [type] vs.  
48 not symptomatic), prior treatment of brain cavernoma, patient certainty about brain  
49 cavernoma treatment (yes vs. no, with preferences), clinician certainty about  
50 cavernoma treatment (yes vs. no, with preferences), eligibility for the CARE pilot trial  
51 (yes vs. no, with reasons for ineligibility), whether approached to take part (yes vs.  
52 no, with reasons for not approaching), whether consent was given to the CARE pilot  
53 trial (yes vs. no, with reasons for declining), and whether the patient was randomised  
54 in the CARE pilot trial (yes vs. no, with reasons for not being randomised and  
55 preferred management outside of CARE).  
56  
57

58  
59 Collection of this information is essential to fulfilling the objectives of the feasibility  
60 study that will determine whether a CARE definitive main phase trial could proceed

(see section 2.2.1 above). The proportions of screened patients who are eligible, approached, agree to take part, and randomised (see trial profile, section 3.1) will be quantified to identify points in the recruitment pathway at which patients are being 'lost' to recruitment. Screening logs will be analysed according to the SEAR (Screened, Eligible, Approached, Randomised) framework (49).

## 5.4 RANDOMISATION

### 5.4.1 Randomisation procedures

If consent to randomisation in the CARE pilot trial is provided, complete baseline data must be collected by the research team at the baseline visit before randomisation. These data include demographic, clinical, and radiographic information, as well as the consensus preference agreed between each patient and their clinician for neurosurgery or Gamma Knife stereotactic radiosurgery should randomisation allocate them to medical and surgical management (if there is no clear preference for the type of surgical treatment, and both are available in clinical practice, the patient will be randomly allocated to neurosurgery or Gamma Knife stereotactic radiosurgery; see section 3.1). Participants in these two strata will be assigned 1:1 to medical management or medical and surgical management using permuted blocks. Allocation will be concealed until participants are enrolled and assigned by using central web-based randomisation.

A detailed description of the randomisation system including details on block size is held in the statistics master file by Edinburgh Clinical Trials Unit (ECTU).

### 5.4.2 Treatment allocation

The participant, or the parent/guardian of paediatric participants, and research team at the recruiting site will be notified of the assigned treatment allocation after randomisation.

### 5.4.3 Blinding (masking)

Treatment allocation in the CARE pilot trial is not blinded (masked), and is therefore open to participants, the clinicians caring for them and local research staff.

We will aim to keep outcome event assessors blind to treatment allocation. We will aim to measure how often assessors are unblinded to treatment allocation during the process of event adjudication.

## 5.5 WITHDRAWAL OF PARTICIPANTS

Participants are free to completely withdraw, or discontinue any individual component of the study, at any point or a participant can be withdrawn by the PI. In the case of loss of mental capacity in adult participants during the trial, researchers will follow the appropriate local regulations and guidance regarding loss of mental capacity in research (noting that these differ between nations, see below). The participant will remain in the trial unless withdrawn by their representative. Data collected until the time of withdrawal will be retained. If withdrawal occurs, the primary reason for

1  
2 withdrawal must be documented in the participant's case report form (CRF). The  
3 participant will have the option of withdrawal from any or all of:

- 4 • consent to be contacted about other research studies
- 5 • consent to recording of recruitment conversation(s)
- 6 • consent to complete a recorded interview with the QuinteT researcher
- 7 • DNA sample provision
- 8 • allocated treatment policy
- 9 • in-person follow-up
- 10 • brain MRI at 6-months
- 11 • participant postal follow-up questionnaires
- 12 • participant follow-up questionnaire conducted by telephone
- 13 • long-term follow-up using record linkage
- 14 • use of de-identified data or brain imaging by other research studies

### 17 18 **5.5.1 Loss of mental capacity in adult participants in England and Wales**

19  
20 In England and Wales, regulations advise that advice should be sought from the  
21 participant's representative on whether the research should be carried out in relation  
22 to the participant and what they think the wishes and feelings of the participant would  
23 be if they had mental capacity (50).

24  
25 Where the participant representative (consultee) requests that the participant who  
26 has lost mental capacity be withdrawn, a delegated member of the research team will  
27 discuss with this person to determine if they think the participant should be withdrawn  
28 taking into consideration what the wishes and feelings of the participant would be  
29 thought to be if they still had the mental capacity to decide for themselves. If it is  
30 agreed that the participant should be withdrawn from the trial, the appropriate trial  
31 form will be completed.

### 34 35 **5.5.2 Loss of mental capacity in adult participants in Scotland**

36  
37 In Scotland, there is no specific legal provision for adults who lose capacity while  
38 taking part in non-CTIMPs. We will respect the participant's original consent to take  
39 part however will also consider the participant's representative's views.

40  
41 Where the participant representative (nearest relative, welfare attorney or welfare  
42 guardian) requests that the participant who has lost mental capacity be withdrawn, a  
43 delegated member of the research team will discuss with this person to determine if  
44 they think the participant should be withdrawn taking into consideration what the  
45 wishes and feelings of the participant would be thought to be if they still had the  
46 mental capacity to decide for themselves. If it is agreed that the participant should be  
47 withdrawn from the trial, the appropriate trial form will be completed (51).

### 50 51 **5.5.3 Loss of mental capacity in adult participants in Northern Ireland**

52  
53 In Northern Ireland, section 138 of Part 8 of the Mental Capacity Act (Northern  
54 Ireland) 2016 applies which states that consent can be considered to endure  
55 provided that the study has not changed significantly since consent was given. We  
56 will respect the participant's original consent to take part however will also consider  
57 the participant's representative's views.

58  
59 Where the participant representative (consultee) requests that the patient who has  
60 lost mental capacity be withdrawn, a delegated member of the research team will

1  
2 discuss with this person to determine if they think the participant should be withdrawn  
3 taking into consideration what the wishes and feelings of the participant would be  
4 thought to be if they still had the mental capacity to decide for themselves. If it is  
5 agreed that the participant should be withdrawn from the trial, the appropriate trial  
6 form will be completed (52).  
7  
8

#### 9 **5.5.4 Loss of mental capacity in adult participants in the Republic of Ireland**

10 Health Service Executive Policy (48) states that:

11 “Outside of clinical trials, there is currently no legal framework for a person who lacks  
12 decision-making capacity to participate in research. In the absence of any such legal  
13 regulations, it is recommended that as a matter of best practice the same principles  
14 should apply to both clinical trials and other forms of research. This means that  
15 consent for participation in any form of research on behalf of an adult lacking  
16 decision-making capacity must be obtained from the person’s legal representative”.

17 The same policy defines ‘legal representative’ as:

18 “...a person not connected with the conduct of the trial who by virtue of his/her family  
19 relationship with an adult lacking decision-making capacity, is suitable to act as the  
20 legal representative and is willing and able to do so or (if there is no such individual)  
21 a person who is not connected with the conduct of the trial, who is a solicitor  
22 nominated by the relevant health care provider.”.  
23  
24  
25  
26  
27  
28

## 29 **6 COMPARATOR**

30  
31 Medical management constitutes standard medical care alone for brain cavernoma,  
32 according to UK guidelines (8). This may include anti-epileptic drug therapy to  
33 prevent epileptic seizures (e.g. following the recommendations of the Surgical Task  
34 Force of the ILAE Commission on Therapeutic Strategies (44)), rehabilitation of  
35 neurological deficits (e.g. physiotherapy, speech and language therapy), medical  
36 treatment of other neurological symptoms (e.g. headache, body pain, spasticity,  
37 dysaesthesia), and psychological support. Provision of these interventions varies  
38 because of the extent of the evidence to support their use, and their availability in  
39 everyday clinical practice around the UK and Ireland according to the nature of  
40 regional and national healthcare systems.  
41  
42

43 Some clinicians arrange repeat brain MRI for patients with brain cavernoma. This  
44 may be done with good reason in order to confirm the diagnosis following intracranial  
45 haemorrhage, in case of diagnostic doubt, to guide treatment decisions, or to  
46 investigate new symptoms as recommended by recent guidelines (15). But in other  
47 cases repeat brain MRI is done to ‘monitor’ brain cavernomas to reassure patients,  
48 although the evidence that this strategy is beneficial is lacking.  
49  
50  
51

## 52 **7 INTERVENTION**

53  
54 Medical and surgical management in the CARE pilot trial is defined as neurosurgical  
55 excision or Gamma Knife stereotactic radiosurgery for brain cavernoma, in addition  
56 to all components of medical management described in section 6 above. These  
57 interventions will be accessed and delivered according to what is available in  
58 standard clinical practice in the participant’s health service.  
59  
60



1  
2 It is expected (but not mandated by the trial protocol) that surgical management will  
3 be delivered within 3 months of randomisation to the trial.  
4  
5

## 6 **7.1 Neurosurgical excision**

7  
8 Surgery will be undertaken by a consultant neurosurgeon responsible for  
9 neurosurgical aspects of the clinical care of the cavernoma patient in CARE. The  
10 neurosurgical technique employed will be that used by the consultant neurosurgeon  
11 in clinical practice. Adjuncts such as image direction, microscopy, ultrasonic  
12 aspiration, awake/general anaesthesia surgery, cortical mapping/stimulation, and  
13 intra-operative MRI, will be used as considered appropriate by the consultant  
14 neurosurgeon.  
15

16  
17 It is recommended (but not mandated by this protocol) that a post-operative MRI  
18 scan is performed within 72 hours of surgery and used along with the surgeon's  
19 assessment to confirm complete resection or incomplete resection. A copy of this  
20 scan will be taken by the research team and uploaded to the scan database for the  
21 trial.  
22

## 23 **7.2 Stereotactic radiosurgery**

24  
25 Stereotactic radiosurgery will be performed at the National Centre for Stereotactic  
26 Radiosurgery in Sheffield or the Queen Square Radiosurgery Centre, which are the  
27 two referral centres in the UK that are commissioned to provide Gamma Knife  
28 stereotactic radiosurgery for cavernoma (29).  
29

30  
31 Standard clinical treatment protocols will be used which involve targeting the brain  
32 cavernoma, but not the surrounding haemosiderin ring. Treatment dosages will range  
33 from 12-16Gy depending on size, shape, definition and site of the cavernoma.  
34  
35

36  
37 If ICH has occurred from the cavernoma, Gamma Knife stereotactic radiosurgery will  
38 be carried out once the haematoma is judged to have been reabsorbed to minimise  
39 radiation exposure and reduce volume of treatment as much as possible.  
40  
41

# 42 **8 STUDY ASSESSMENTS**

## 43 **8.1 STUDY ASSESSMENTS**

44  
45 This section outlines the study assessments to be completed by the research team.  
46 The schedule of study assessments is provided on the following page.  
47  
48  
49  
50  
51  
52  
53  
54  
55  
56  
57  
58  
59  
60

### 8.1.1 Table of assessments

| Assessment                                                               | Identification and Screening | Baseline visit | Within 3 months of baseline | 6-month local in-person follow-up | 6-monthly central follow-up |
|--------------------------------------------------------------------------|------------------------------|----------------|-----------------------------|-----------------------------------|-----------------------------|
| Assessment of eligibility                                                | X                            |                |                             |                                   |                             |
| Screening end enrolment logs                                             | X                            |                |                             |                                   |                             |
| Consent to recruitment conversation recordings                           | X <sup>1</sup>               |                |                             |                                   |                             |
| Consent to qualitative interview                                         | X                            |                |                             |                                   |                             |
| Recording of patient recruitment conversations                           | X <sup>2</sup>               | X <sup>2</sup> |                             |                                   |                             |
| Consent to randomisation                                                 | X <sup>3</sup>               | X <sup>3</sup> |                             |                                   |                             |
| Demographic, clinical, socio-economic, medication, and radiographic data |                              | X              |                             |                                   |                             |
| DNA sample                                                               |                              | X              |                             |                                   |                             |
| Provision of diagnostic brain imaging                                    |                              | X              |                             |                                   |                             |
| Randomisation                                                            |                              | X              |                             |                                   |                             |
| Questionnaires                                                           |                              | X              |                             | X                                 | X                           |
| Cavernoma surgical management                                            |                              |                | X                           |                                   | X                           |
| Repeat brain MRI                                                         |                              |                |                             | X                                 |                             |
| Outcomes and adverse events                                              |                              |                |                             | X                                 | X                           |
| Qualitative interview                                                    |                              |                | X <sup>4</sup>              |                                   |                             |

1 – Research teams will be asked to capture verbal consent to audio-recordings of recruitment conversations when the approach is made to the participant. If this is not possible at this time, consent may be captured during subsequent recruitment conversations.

2 – Recordings of recruitment conversations with patients should be captured (as requested) wherever the CARE pilot trial is discussed (illustrated here but not restricted to Screening and Baseline Visit).

3 – Consent to participation in CARE may be collected at the Baseline Visit or in advance, during the Screening stage.

4 – Interviews with patients will take place within 3 months of being invited to take part in the trial.

### 8.1.2 Screening

Potential participant identification and screening should be carried out as per sections 5.1 and 5.2.

Approached patients who decline to take part will be given the opportunity to take part in an interview to discuss why they decided not to participate as per section 5.2.3.

Research teams should complete screening and enrolment logs as per section 5.3.

### 8.1.3 Informed consent

It is likely that consent to participate in the CARE pilot trial will be captured during a clinical consultation between the patient and a clinician who is also a member of the CARE pilot trial research team. The consenting procedures outlined in section 5.2. will be followed.

### 8.1.4 Baseline visit

Baseline visits may be conducted remotely or in person, depending on patient, carer or parent/guardian preference, and restrictions on working practices. These visits will be conducted by research team staff who are members of, or affiliated to, the clinical care team.

Research team staff will collect the following data at the baseline visit from all study participants: demographics, socioeconomic characteristics (e.g. employment, education, and carer needs), medical history (including details of the type of presentation of the symptomatic brain cavernoma and family history) and medications (including drug therapy).

The patient reported questionnaires that should be completed are EQ5D-5L for adults or EQ5D-3Y for children and Liverpool Seizure Severity Scale (LSSS).

The patient should be assessed by the research team member (assisted by parent/guardian where required) using the following scales:

1. Modified Rankin Scale (mRS) score
2. National Institute of Health Stroke Scale Score (adult or paediatric) (if examined in person)
3. Karnofsky Performance Status (KPS) scale in adults and Lansky Play-Performance Scale in children (LPS)

If the visit is done face to face, research team staff will collect a venous blood sample of up to 10mL from patients who consent into an EDTA tube for genetic analysis. Samples will be shipped immediately by first class post and in adherence with UN3373 guidelines to the central laboratory at the Edinburgh Clinical Research Facility.

The research team at each site is responsible for entering these data onto the study Electronic Case Report Form (eCRF). Once baseline data are complete, randomisation may proceed. After randomisation is performed, the PI and other research staff on the delegation log at the participant's site will be sent email

confirmation or randomisation and treatment allocation, with a reminder about the subsequent scheduled activities in the trial.

Research teams will upload the relevant pseudo-anonymised DICOM images of the brain imaging (including diagnostic brain MRI) that confirmed the mode of presentation and diagnosis of the symptomatic cavernoma to the trial imaging database. Images may also be copied to CD and posted to the brain imaging management team for upload. These scans will be stored for subsequent validation by a senior neuroradiologist to confirm or refute eligibility.

### 8.1.5 Three-month adherence check

The PI and research staff at a site where a participant was randomised will be sent an email prompt around three months after baseline to report whether surgical management was undertaken after randomisation, regardless of whether the participant was allocated to surgical management by randomisation. This will allow detection of cross-overs between the two arms of the trial.

Adherence to the randomised allocation will be assessed by comparing treatment allocation with the completion of the surgical management case report form. Lack of adherence to the randomised treatment allocation will not be recorded as a protocol deviation or violation.

### 8.1.6 Six-month local follow-up visit

Participants will be asked to attend for their first six-month follow-up visit in person in order to perform brain MRI (which will be permitted between 5-7 months after randomisation) to assess cavernoma presence and size as a measure of the efficacy of surgical management. These images should be uploaded to the trial imaging database or research teams may post CDs to the MRI management team for upload. The radiology department at each site will issue the clinical report of any brain MRI performed for the CARE pilot trial. A copy of MRI brain scans performed before or after surgical management (if performed) will be taken by the research team and uploaded to the scan database for the trial. A copy of the MRI performed on the day of treatment for patients undergoing stereotactic radiosurgery will be taken by the research team and uploaded to the database for the trial (or copied to CD and posted to the MRI management team for upload).

Research teams will record details of any clinical outcome events that have occurred since randomisation, whether surgical management was used, including specific operative techniques or methods of stereotactic radiosurgery. Although surgical management in the CARE pilot trial will continue to be neurosurgical excision or stereotactic radiosurgery, we will collect details of each type of surgical management used after randomisation to allow us to quantify the use of emerging technologies, such as minimally invasive therapeutic approaches for brain cavernoma such as magnetic resonance thermography-guided laser interstitial thermal therapy, or stereotactic laser ablation (41).

Imaging studies performed because of the occurrence of an outcome event will be collected by the research team and uploaded to the scan database for the trial.

The patient reported questionnaires that should be completed are EQ5D-5L for adults or EQ5D-3Y for children and Liverpool Seizure Severity Scale (LSSS).

The patient should be assessed by the research team member (assisted by parent/guardian where required) using the following scales:

1. Modified Rankin Scale (mRS) score
2. National Institute of Health Stroke Scale Score (adult or paediatric) (if examined in person)
3. Karnofsky Performance Status (KPS) scale in adults and Lansky Play-Performance Scale in children (LPS)

If a blood sample for genetic analysis was not collected as the Baseline Visit, research team staff will collect a venous blood sample of up to 10mL from patients who consent into an EDTA tube. The sample will be shipped immediately by first class post and in adherence with UN3373 guidelines to the central laboratory at the Edinburgh Clinical Research Facility.

### 8.1.7 Six-monthly central follow-up visit

Thereafter, staff at the TCC, will perform six-monthly follow-up (+/- one month) by post in all patients who do not withdraw from follow-up in the CARE pilot trial, after checking the participant's vital status with their general practitioner. If a response is not received by the TCC within a fortnight, a research team member (based within ECTU) will contact non-responders and follow-up data by telephone or email.

Follow-up questionnaires will confirm participants' current domicile and general practitioner, and ask about disability, health-related quality of life, the occurrence of primary or secondary clinical outcomes, serious adverse events, and the occurrence of surgical management of the brain cavernoma (as described above). These questionnaires will also ask for information about relevant concomitant medications, such as anti-epileptic drugs. We will also record the use of drugs like propranolol, antiplatelet agents, anticoagulant agents and statins, which may have disease-modifying effects (49).

The patient reported questionnaires that should be completed are EQ5D-5L for adults or EQ5D-3Y for children and Liverpool Seizure Severity Scale (LSSS).

The patient should be assessed by the research team member (assisted by parent/guardian where required) using the following scales:

1. Modified Rankin Scale (mRS) score
2. Karnofsky Performance Status (KPS) scale in adults and Lansky Play-Performance Scale in children

### 8.1.8 Patient Interviews

In-depth interviews will be conducted by the qualitative researcher with a sample of eligible patients who have been approached to take part in the trial (including those accepting or declining participation) (see section 9.4). Purposive sampling will be used to identify patients who have declined participation from a variety of study sites, to gain insight into study-wide and site-specific reasons patients may have for declining. Purposive sampling of patients accepting participation in the CARE pilot trial will also be considered if findings from analysis of recorded recruitment conversations indicates this will be helpful. Interviews will take place within three months of the decision about trial participation (see 8.1.1).

## 8.2 LONG TERM FOLLOW UP

We will ask study participants to consent to long-term follow up (i.e. beyond the planned follow-up in the CARE pilot trial), including the use of routinely collected data (such as hospital admissions, procedures, and death certificates), in case the CARE pilot trial is successful and runs seamlessly into a definitive main phase trial.

## 8.3 BRAIN MAGNETIC RESONANCE IMAGING

Participants who consent to be randomised should undergo repeat brain MRI once at six months ( $\pm$  one month) after randomisation.

Brain MRI is usually undertaken after surgical management in clinical practice, but not always during medical management. If a participant undergoes brain MRI with the required sequences as part of their routine clinical care before the 6-month local follow up visit, the research team will request the brain MRI and upload the scan to the trial imaging database. Otherwise, repeat brain MRI should be performed six months after randomisation ( $\pm$  one month), regardless of treatment allocation, treatment received, and timing of treatment, for research purposes.

As a minimum standard, T1-weighted, T2-weighted, and haem-sensitive sequences (gradient recalled echo or susceptibility weighted imaging) will be required within standard sequence parameters and with an acceptable slice thickness and voxel size. We will collect any other sequences performed (e.g. Fluid Attenuated Inversion Recovery (FLAIR) post-contrast, T1 or FLAIR, and Diffusion-Weighted Imaging [DWI] sequences) to ascertain the frequency of their use for follow-up of brain cavernoma in everyday clinical practice.

## 8.4 OUTCOME EVENT ADJUDICATION

Clinical outcomes including death and stroke-like events will be adjudicated by a member of the TMG using all available source data (with patient identifiers and any information about cavernoma treatment redacted by the research team before upload to trial database) including clinical correspondence, brain imaging reports, and death certificate. Brain imaging performed during follow-up will be reviewed by a consultant neuroradiologist. Outcome assessors will aim to remain blinded to the brain cavernoma treatment policy that was allocated at randomisation, and if possible any medical and surgical management of the brain cavernoma received. If blinding could not be maintained, this will be documented.

## 8.5 DNA SAMPLE STORAGE AND ANALYSIS

A venous blood sample of up to 10mL will be collected into an EDTA tube for genetic analysis. Samples will be shipped immediately by first class post and in adherence with UN3373 guidelines to the central laboratory at the Edinburgh Clinical Research Facility for DNA extraction and future analysis. This sample will be stored for subsequent investigation of genetic modifiers of treatment effect, which are currently unknown (1). The relevant approvals will be sought for future research involving these samples.

## 9 DATA COLLECTION

Data items to be collected are described in section 8. This section describes the methods of data collection.

### 9.1 SOURCE DATA DOCUMENTATION

Source documents are those in which information is recorded and documented for the first time. The location of source data collected from the CARE pilot trial participants is detailed in the CARE pilot trial Source Data Plan. Investigators will be required to retain paper copies of completed ICFs. Otherwise, clinical data will be entered directly into the eCRF by the research team and TCC staff based on information in the medical records, which will be regarded as source data.

### 9.2 CASE REPORT FORMS

Documents reflecting the data required at each study assessment will be made available to research teams, to support entry into the study database of: Screening Log, Consent to Contact form, Consent and Status Log, Baseline Visit CRF, 6-Month Follow-up CRF, Serious Adverse Events Log and Change of Status form. Site research teams will be responsible for transcribing these data into the database. Data will be transcribed by those staff delegated to do so on the delegation log held at site.

### 9.3 STUDY DATABASE

The study database will be created and maintained by ECTU. This database will be compliant with the relevant regulations and Sponsor Standard Operating Procedures (SOPs). Trained and delegated members of the research team will be given password-protected logins to the database. The data will be stored in a secure server in the University of Edinburgh.

### 9.4 QRI DATA COLLECTION

#### 9.4.1 Screening log data

Screening logs will collect de-identified data on patients screened, identified as eligible, approached and accepting randomisation into the CARE pilot trial (see section 5.4) and identify points in the pathway where patients may be 'lost' to recruitment. Findings will guide data collection using the qualitative methods outlined below.

#### 9.4.2 Recordings of recruitment conversations

Patients will be invited to consent to the recording of all conversations during which participation in the CARE pilot trial is discussed. These conversations provide insight into both how the study is presented to patients and how patients interpret that

information. Analysis of these conversations can reveal misunderstandings about that trial that can then be addressed in recruiter training.

### 9.4.3 Patient and staff interviews

A sample of eligible patients who have been approached to take part in the trial (including those accepting and declining participation) will be invited to take part in an in-depth interview with the qualitative researcher based at the University of Bristol. This interview will take place within three months of being invited to take part in the trial.

Interviews with patients will explore views on the presentation of trial information, understanding of study processes (e.g. randomisation), and reasons underlying decisions to consent or decline to participate in the CARE pilot trial. Numbers of interviews will be guided by the concept of 'data saturation' with final sample size (up to a maximum of 20 interviews) determined by the point at which three new interviews fail to shed insights.

Staff involved in the trial will also be invited to take part in an in-depth interview. Interviews with health professionals will use purposeful sampling. Interviews with staff will include members of the trial TMG, including the CI, and those closely involved in the design, management leadership and coordination of the trial (approximately n=4-8); clinicians or researchers involved in trial recruitment (approximately n=12-20).

Interviews with TMG members and investigators at sites will investigate their perspectives on the CARE pilot trial and experiences of recruitment (where relevant). Key topics explored will include views about the study design and protocol; understandings of the evidence on which the study is based; perceptions of uncertainty/equipose in relation to the intervention arms; views about how the arms/protocol are delivered in clinical centres; methods for identifying eligible patients; views on eligibility, and examples of actual recruitment successes and difficulties.

Interviews will take place at a mutually convenient time by telephone or video-conferencing and will be recorded using University of Bristol approved methods for data capture and storage (this may include MS Teams and Zoom, depending on current policies).

### 9.4.4 Meetings

A QuinteT researcher will observe all TMG and TSC meetings during which the study protocol is developed and finalised, with a focus on discussions and final presentation of equipose and eligibility criteria.

### 9.4.5 Trial documentation

The QRI team will continue to review the wording of patient information leaflets (PIL) and consent forms in line with any feedback from the above that indicates content that is unclear or potentially open to misinterpretation.



## 10 DATA MANAGEMENT AND TRANSFER

### 10.1 PERSONAL DATA

The following personal data will be collected as part of this research: contact details (including home address, telephone numbers, email address, date of birth and contact information for relatives/carers), demographic information (including age and sex), socioeconomic information, medical history (including prior symptoms from brain cavernoma, major co-morbidities, medication history, family history), and unique healthcare identifier (such as the Community Health Index [CHI] in Scotland, NHS Number, or equivalent in other nations). Unique healthcare identifiers will be collected to enable long term patient follow-up and ensure correct identification of patients when contacting GPs or sites for follow-up.

Personal data will be processed by site research teams, the TCC at the University of Edinburgh and qualitative research staff at the University of Bristol:

- Personal data will be stored at site by research teams on NHS computers (desktop and laptop). Computers will be password protected and kept in locked offices. All paper files containing personal data will be held in filing cabinets in NHS offices that will be locked when unattended. Study documentation will be accessed by the study team only.
- Personal data will also be entered into the secure trial database which will be hosted on a University of Edinburgh server and will be accessed by the TCC to perform 6-monthly follow-up with patients and long term follow up via record linkage.
- Contact information will be accessed by/passed to the qualitative researcher based at University of Bristol to contact patients for interview.
- Screening log data will be accessed by the qualitative researcher based at University of Bristol as part of the research.

Additional information on personal data in relation to the qualitative aspect of the trial is included in section 10.3.

### 10.2 BRAIN MRI SCANS

Diagnostic brain imaging will be managed by the Systematic Management, Archiving & Reviewing of Trial Images Service (SMARTIS) at the University of Edinburgh. We will establish a scan database (housekeeping system) using established models, to track all scan episodes, completeness and assessments; this will interface with the trial database. De-identified brain MRI scans will be uploaded to this database by research teams or by SMARTIS staff if CDs are posted to them. Scan collection, quality assurance, curation, and backup will be conducted by SMARTIS staff at the Brain Research Imaging Centre (BRIC), University of Edinburgh. Prof Phil White, or another neuroradiologist involved in the trial, will review the diagnostic and follow-up brain MR imaging using standardised review proforma derived from pre-existing validated work (Scottish Audit of Intracranial Vascular Malformations - SAIVMs).

### 10.3 QUINTET RECRUITMENT INTERVENTION

#### 10.3.1 Recordings of recruitment conversations

1  
2 Recruitment conversations will be recorded by a research team member using a  
3 method of secure data capture and storage in line with University of Bristol  
4 procedures (as outlined on the University of Bristol website). Audio-recordings will be  
5 transferred by secure data transfer by the approved qualitative research team  
6 members onto a secure drive at the University of Bristol for long-term storage and  
7 analysis. Audio-recordings will be labelled with the participant identification number;  
8 identifiable patient details will not be used.  
9

10 Audio-recordings will be subject to targeted transcription and edited to protect the  
11 anonymity of respondent. Transcription will be undertaken by an approved  
12 transcription service/transcriber that has signed the necessary confidentiality  
13 agreements with the University of Bristol. Data will be managed using NVivo software  
14 and stored on encrypted drives at the University of Bristol, in line with the university's  
15 data storage policies and in line with GDPR legislation.  
16

17  
18 At the end of the study, audio-recordings will be kept for at least 10 years before they  
19 will be destroyed. Transcripts will be stored indefinitely in secure research data  
20 storage designated 'controlled access', so can only be accessed by approved  
21 individuals who are interested in conducting their own analyses of the data. These  
22 individuals will have to submit an application to do this, which will be assessed by an  
23 independent committee. However, all data will have identifiable information removed  
24 before they are made available, and there will be no way to identify any individuals  
25 mentioned in interviews/appointments.  
26

### 27 28 **10.3.2 Interviews**

29  
30 Approved qualitative research team members from University of Bristol will access  
31 participants' contact details via the trial database or be securely passed them by the  
32 research team for the purposes of contacting patients who have consented to  
33 interviews as part of the QRI. Team members will be provided with an individual user  
34 account for the database with restricted, password-controlled access.  
35

36  
37 Interviews with patients and staff will be recorded directly by the qualitative  
38 researcher using processes for secure data capture and storage in line with  
39 University of Bristol procedures (as outlined on the University of Bristol website).  
40 Recordings will be held on a secure drive with restricted access at the University of  
41 Bristol for long-term storage and analysis. Recordings will be labelled with the  
42 participant identification number; identifiable patient details will not be used. At the  
43 end of the trial, recordings will be held for a minimum of 10 years after which they will  
44 be destroyed.  
45

46 Data from the QRI will be shared at the end of the trial as outlined in section 17.3.  
47

### 48 49 **10.3.3 QRI documentation**

50  
51 Paper or electronic documentation which is generated through the process of  
52 performing the QRI will be stored securely at the University of Bristol with access  
53 restricted only to approved personnel.  
54  
55

## 56 57 58 **10.4 DATA CONTROLLER**

59  
60 The University of Edinburgh and NHS Lothian are joint data controllers.

## 10.5 DATA BREACHES

Any data breaches will be reported to the University of Edinburgh and NHS Lothian Data Protection Officers who will onward report to the relevant authority according to the appropriate timelines if required.

# 11 STATISTICS AND DATA ANALYSIS

## 11.1 SAMPLE SIZE CALCULATION

Symptomatic brain cavernoma incidence data indicate that ~240 people would be newly-diagnosed during 18 months of recruitment (4). We aim for all of these patients to be screened, but if 10% are missed and 10% decline to participate, we expect research teams to identify ~190 patients. In the ARUBA trial, 226/726 (31%) of the eligible patients approached were randomised (30), so we expect ~60 patients with symptomatic brain cavernoma to be randomised in the CARE pilot trial.

## 11.2 PROPOSED STATISTICAL ANALYSES

In this pilot phase, analyses are descriptive only, and there will be no formal statistical tests.

We will quantify the number and proportions (with 95% confidence intervals to reflect their precision) of patients who are screened, eligible, approached, consent and are randomised. We will construct a CONSORT diagram to summarise the distribution and progress of participants in the trial including the numbers of withdrawals (50).

We will report descriptively the following: the number and the proportion of the collaborating sites that take part and recruit participants to the CARE pilot trial; research teams' implementation of trial procedures measured by number and type of protocol deviation; the numbers of participants allocated to neurosurgery and stereotactic radiosurgery; adherence to the allocated intervention; completeness of follow-up that would be due at each 6-month interval; completeness of baseline, imaging and outcome data; the frequency of outcome events overall and in an intention-to-treat analysis keeping patients in the treatment group to which they were allocated during all available follow-up.

We will also compare descriptively the characteristics of eligible patients who are screened and do not participate in the CARE pilot trial to eligible patients who are randomised using the characteristics recorded on the screening logs to assess generalisability (external validity) and any recruitment bias.

We will assess measures of functional outcome, to assess which has suitable statistical properties for use in a main phase trial (such as lack of floor/ceiling effects). We will assess whether such a measure (like the method we have used before (9)) would be more suitable as a primary outcome in place of intracranial haemorrhage.

## 11.3 QUINTET RECRUITMENT INTERVENTION DATA ANALYSIS

### 11.3.1 Screening and enrolment logs

The QuinteT researcher will analyse data using the SEAR framework to observe differences between sites in recruitment patterns as new sites open (51). Simple descriptive analyses will identify points in the recruitment pathway at which patients are lost to recruitment to the cohort or trials and the reasons why. Detailed eligibility and recruitment pathways will be compiled for sites, noting the point at which patients receive information about the study, which members of the clinical team they meet, and the timing and frequency of appointments. Recruitment pathways will be compared with details specified in the trial protocol and pathways from other sites to identify practices that are potentially more/less efficient. Numbers of eligible and recruited patients will be compared across sites and considered in relation to estimates specified in the grant application/study protocol. These data will be triangulated with qualitative findings (see below) to identify barriers and potential solutions to recruitment.

### 11.3.2 Recordings of recruitment conversations and interviews

Audio recordings of recruitment conversations will be sought from a purposefully sampled range of recruiting sites (showing higher and lower recruitment) to ensure maximum variation and recordings will be analysed by the QuinteT researcher. The audio recordings will be used to explore information provision, management of patient treatment preferences, and randomisation decisions to identify recruitment difficulties and improve information provision. Audio-recorded recruitment consultations will be subjected to targeted transcription with relevant sections first identified then transcribed and identifying data removed before fuller analysis. Analysis will employ content, thematic, and novel analytical approaches, including targeted conversation analysis (52) and quanti-qual appointment timing (the 'Q-Qat method') (53), as described in the QuinteT recruitment intervention protocol [24]. Interview data will be analysed thematically using constant comparative approaches derived from Grounded Theory methodology (54).

Findings from the investigation of recruitment to the CARE trials will be fed back to the CI, TMG, and collaborator Bauld, where appropriate, to determine a plan of actions to optimise recruitment to the pilot trials. Actions may include feedback to individuals or in groups as appropriate and will include template patient pathways, individualised or generic 'tips' sheets for recruiters and delivery of recruiter training. Group feedback and training will be timed to coincide with the meetings of professional associations mentioned above.

## 12 HEALTH ECONOMICS AND DATA ANALYSIS

We will collect self-reported health service use and social/economic outcomes using bespoke question sets that will inform future economic analyses (9; 10). If data collection is confirmed as feasible, then a previously developed decision model (20) will be updated and further developed to incorporate data collected within this study to provide a putative estimate of cost-effectiveness and its drivers. In the context of the CARE pilot trial, the health economics objectives are to: (i) design and test an optimal mechanism for the capture of resource use and cost data in community NHS

1 settings, NHS secondary care, participants' out of pocket expenses and carer costs,  
2 (ii) estimate expected effect size and variance of relevant outcomes including health-  
3 related utility and quality-adjusted life years, and (iii) identify and measure the  
4 potential cost implications of surgical management of cavernomas. We will measure  
5 health-related utility (55), healthcare-related resource use and costs using participant  
6 questionnaires before randomisation and at each follow-up timepoint (56). These  
7 costs will be ratified by the study team through scrutiny of the patient pathway in both  
8 arms of the trials using available medical records to populate CRFs. We will assign  
9 unit costs using standard national costing sources where available, or through  
10 consultation with relevant service business managers. Costs will be summarised  
11 from the perspectives of (a) the NHS and personal social services, and (b) wider  
12 society (including participants' and their carers' out-of-pocket costs and lost  
13 productivity).  
14  
15  
16  
17  
18

## 19 **13 ADVERSE EVENTS**

20  
21  
22 The PI is responsible for the detection and documentation of events meeting the  
23 criteria and definitions detailed below. This task may also be carried out by another  
24 suitably qualified clinician in the research team at that site who has been delegated  
25 this role. Only clinical outcomes and relevant serious adverse events (SAE) related to  
26 medical and surgical management that occur after randomisation until the final 6-  
27 month follow-up review must be recorded in the eCRF. Participants will be instructed  
28 to contact their local research team if any symptoms develop at any time after being  
29 randomised.  
30  
31

### 32 **13.1 DEFINITIONS**

33  
34 An **adverse event** (AE) is any untoward medical occurrence in a clinical trial  
35 participant which does not necessarily have a causal relationship with an  
36 investigational medicinal product (IMP).  
37  
38

39 An **adverse reaction** (AR) is any untoward and unintended response to an IMP  
40 which is related to any dose administered to that participant.  
41

42 A **serious adverse event** (SAE), **serious adverse reaction** (SAR). Any AE or AR  
43 that at any dose:  
44

- 45 • results in death of the clinical trial participant;
  - 46 • is life threatening\*;
  - 47 • requires in-patient hospitalisation<sup>^</sup> or prolongation of existing hospitalisation;
  - 48 • results in persistent or significant disability or incapacity;
  - 49 • consists of a congenital anomaly or birth defect;
  - 50 • results in any other significant medical event not meeting the criteria above.
- 51  
52

53 \*Life-threatening in the definition of an SAE or SAR refers to an event where the  
54 participant was at risk of death at the time of the event. It does not refer to an event  
55 which hypothetically might have caused death if it were more severe.  
56

57 <sup>^</sup>Any hospitalisation that was planned prior to enrolment will not meet SAE criteria.  
58 Any hospitalisation that is planned post enrolment will meet the SAE criteria.  
59  
60

## 13.2 IDENTIFYING SAEs

Participants will be asked about the occurrence of SAEs wherever contact is made with them between randomisation and the final central six monthly follow up review. Open-ended and non-leading verbal questioning of the participant will be used to enquire about SAE occurrence. Only events which are clinical outcomes on the trial or are related to medical and surgical management will be recorded as AEs and SAEs. Participants will also be asked if they have been admitted to hospital, used any new medicines or changed concomitant medication regimens. If there is any doubt as to whether a clinical observation is an SAE, the event will be recorded. SAEs might also be identified via information from support departments e.g. laboratories.

## 13.3 RECORDING SAEs

When an SAE occurs, it is the responsibility of the PI, or another suitably qualified clinician in the study team who is delegated to record and report SAEs, to review all documentation (e.g. hospital notes, laboratory and diagnostic reports) related to the event. It is the PIs responsibility, or another suitably qualified clinician that has been delegated this role, to assess whether an AE is an outcome in the trial. The PI or delegated research team member will then record all relevant information in the CRF/AE log and on the SAE form (if the AE meets the criteria of serious). If the AE is detected by central means of follow-up, the TCC will initiate the collection of this information but enlist the help of local site research staff to acquire the relevant clinical and imaging information. Information to be collected includes type of event, onset date, clinical assessment of severity and causality, date of resolution as well as treatment required, investigations needed and outcome.

### 13.3.1 Pre-existing medical conditions

Pre-existing medical conditions (i.e. existed prior to informed consent) should be recorded as medical history and only recorded as SAEs if medically judged to have worsened during the trial and meet the definition of an SAE.

### 13.3.2 Worsening of the underlying condition during the trial

Medical occurrences or symptoms of deterioration that are expected to be due to the participant's underlying condition should be recorded in the participant's medical notes and only be recorded as SAEs if medically judged to have unexpectedly worsened during the trial. Events that are consistent with the expected progression of the underlying disease should not be recorded as SAEs.

## 13.4 ASSESSMENT OF AEs AND SAEs

Each AE which may be a clinical outcome for the trial or may be related to surgical management must be assessed for seriousness, causality, severity and ARs must be assessed for expectedness by the PI or another suitably qualified clinician in the study team who has been delegated this role.

1  
2 The CI may not downgrade an event that has been assessed by an Investigator as  
3 an SAE or a related and unexpected SAE, but can upgrade an AE to an SAE, SAR or  
4 SUSAR if appropriate.  
5  
6

#### 7 **13.4.1 Assessment of Seriousness**

8  
9 The Investigator will make an assessment of seriousness as defined in Section 13.1.  
10  
11

#### 12 **13.4.2 Assessment of Causality**

13  
14  
15 The Investigator will make an assessment of whether the AE/SAE is likely to be  
16 related to the study intervention according to the definitions below.  
17

18 **Unrelated:** where an event is not considered to be related to the treatment allocated  
19 at randomisation.  
20

21 **Possibly Related:** The nature of the event, the underlying medical condition,  
22 concomitant medication or temporal relationship make it possible that the AE has a  
23 causal relationship to the treatment allocated at randomisation.  
24  
25

#### 26 **13.4.3 Assessment of Expectedness**

27  
28  
29 If the AE is judged to be related to the study interventions, the Investigator will make  
30 an assessment of expectedness.  
31

32 **Expected:** The type of event is expected in line with the treatment allocated at  
33 randomisation.  
34

35 **Unexpected:** The type of event was not listed in the protocol or is not an expected  
36 clinical occurrence.  
37  
38

#### 39 **13.4.4 Assessment of Severity**

40  
41  
42 The Investigator will make an assessment of severity for each AE/SAE and record  
43 this on the CRF or SAE form according to one of the following categories:  
44

45 **Mild:** an event that is easily tolerated by the participant, causing minimal discomfort  
46 and not interfering with every day activities.  
47

48 **Moderate:** an event that is sufficiently discomforting to interfere with normal everyday  
49 activities.  
50

51 **Severe:** an event that prevents normal everyday activities.  
52  
53

54 Note: the term 'severe', used to describe the intensity, should not be confused with  
55 'serious' which is a regulatory definition based on participant/event outcome or action  
56 criteria. For example, a headache may be severe but not serious, while a minor  
57 stroke is serious but may not be severe.  
58  
59  
60

## 13.5 REPORTING OF SAEs

Once the Investigator becomes aware that an SAE has occurred in a study participant, the information will be reported to the ACCORD (Academic and Clinical Central office for Research and Development) Research Governance & Quality Assurance (QA) Office **immediately or within 24 hours**. If the Investigator does not have all information regarding an SAE, they should not wait for this additional information before notifying ACCORD. The SAE report form can be updated when the additional information is received.

The SAE form will be emailed to ACCORD via [Safety@accord.scot](mailto:Safety@accord.scot). Only forms in a PDF format will be accepted by ACCORD via email.

The Investigator will follow up each event until resolution. Where missing information has not been sent to ACCORD after an initial report, ACCORD will contact the investigator and request the missing information.

All reports faxed to ACCORD and any follow up information will be retained by the Investigator in the Investigator Site File (ISF).

The sponsor is responsible for reporting SAEs that are considered to be “possibly related” to the treatment allocation and “unexpected”, to the REC within 15 days of becoming aware of the event.

The TCC will provide SAE line listings from ACCORD for circulation prior to DMC meetings.

## 14 PREGNANCY

Although pregnancy is not considered an AE or SAE; as a matter of safety, the Investigator will be required to record any female participant’s pregnancy which occurs while participating in the study. The Investigator will need to record the information on a Pregnancy Notification Form and submit this to the ACCORD office within 14 days of being made aware of the pregnancy. All pregnant female participants will be followed up until the outcome of the pregnancy.

## 15 OVERSIGHT ARRANGEMENTS

### 15.1 TRIAL MANAGEMENT GROUP

The trial will be coordinated by a TMG, consisting of the CI, grant holders, Trial Manager and PAG members. The roles and responsibilities of the TMG and the names of committee members are detailed in the TMG charter.

The Trial Manager will coordinate and oversee the trial and will be accountable to the CI. The Data Manager will be responsible for checking the CRFs for completeness, plausibility and consistency. Any queries will be resolved by the Investigator or delegated member of the site team.

### 15.2 TRIAL STEERING COMMITTEE



1  
2 A Trial Steering Committee (TSC) will be established to oversee the conduct and  
3 progress of the trial. The terms of reference of the TSC, reporting arrangements and  
4 the names of committee members are detailed in the TSC charter.  
5  
6

### 7 **15.3 DATA MONITORING COMMITTEE**

9 An independent Data Monitoring Committee (DMC) will be established to oversee the  
10 safety of participants in the trial. The terms of reference of the Data Monitoring  
11 Committee and the names of committee members are detailed in the DMC charter.  
12 The DMC Charter will be signed by the appropriate individuals before recruitment to  
13 the trial starts.  
14  
15

### 16 **15.4 PATIENT ADVISORY GROUP**

17  
18 The patient advocacy organisation CAUK will organise input from a diverse Patient  
19 Advisory Group which will aim to meet bi-monthly. Two representatives of this PAG  
20 will join the TSC. The terms of reference of the Patient Advisory Group and the  
21 names of committee members are detailed in the PAG Terms of Reference.  
22  
23

### 24 **15.5 INSPECTION OF RECORDS**

25  
26 Investigators and institutions involved in the study will permit trial related monitoring  
27 and audits on behalf of the sponsor, REC review, and regulatory inspection(s). In the  
28 event of audit or monitoring, the Investigator agrees to allow the representatives of  
29 the sponsor direct access to all study records and source documentation. In the  
30 event of regulatory inspection, the Investigator agrees to allow inspectors direct  
31 access to all study records and source documentation.  
32  
33

### 34 **15.6 STUDY MONITORING AND AUDIT**

35  
36 The ACCORD Sponsor Representative will assess the study to determine if an  
37 independent risk assessment is required. If required, the independent risk  
38 assessment will be carried out by the ACCORD Quality Assurance Group to  
39 determine if an audit should be performed before/during/after the study and, if so, at  
40 what frequency.  
41  
42

43 Risk assessment, if required, will determine if audit by the ACCORD QA group is  
44 required. Should audit be required, details will be captured in an audit plan. Audit of  
45 Investigator sites, study management activities and study collaborative units, facilities  
46 and 3<sup>rd</sup> parties may be performed.  
47  
48  
49

## 50 **16 GOOD CLINICAL PRACTICE**

### 51 **16.1 ETHICAL CONDUCT**

52  
53 The study will be conducted in accordance with the principles of the International  
54 Conference on Harmonisation Tripartite Guideline for Good Clinical Practice (ICH  
55 GCP). Before the study can commence, all required approvals will be obtained and  
56 any conditions of approvals will be met.  
57  
58  
59  
60

## 16.2 INVESTIGATOR RESPONSIBILITIES

The PI is responsible for the overall conduct of the study at the site and compliance with the protocol and any protocol amendments. In accordance with the principles of ICH GCP, the following areas listed in this section are also the responsibility of the PI. Responsibilities may be delegated to an appropriate member of study site staff. A Delegation Log will be prepared for each site, detailing the responsibilities of each member of staff working on the trial.

### 16.2.1 Informed Consent

The PI is responsible for ensuring informed consent is obtained before any protocol specific procedures are carried out. The decision of a participant to participate in clinical research is voluntary and should be based on a clear understanding of what is involved.

Participants must receive adequate oral and written information – appropriate PILs and ICFs will be provided. The oral explanation to the participant will be performed by the PI or qualified delegated person, and must cover all the elements specified in the PIL and ICF. The participant must be given every opportunity to clarify any points they do not understand and, if necessary, ask for more information. The participant must be given sufficient time to consider the information provided. It should be emphasised that the participant may withdraw their consent to participate at any time without loss of benefits to which they otherwise would be entitled. The participant will be informed and agree to their medical records being inspected by regulatory authorities and representatives of the sponsor(s).

The PI or delegated member of the research team and the participant will sign and date the ICF(s) to confirm that consent has been obtained. The participant will receive a copy of this document and a copy filed in the Investigator Site File (ISF) and participant's medical notes (if applicable).

### 16.2.2 Study Site Staff

The PI and research team must be familiar with the protocol and the study requirements. It is the PI's responsibility to ensure that all staff assisting with the study are adequately informed about the protocol and their trial related duties.

### 16.2.3 Data Recording

The PI is responsible for the quality of the data recorded in the CRF at each Investigator Site.

### 16.2.4 Investigator Documentation

The PI will ensure that the required documentation is available in local Investigator Site files.

### 16.2.5 Training

#### 16.2.5.1 Recruitment site training

Research teams will be trained on the trial protocol, sponsor SOPs and QRI processes by the trial team and qualitative researcher (in person or remotely). This will be completed before the site is permitted to open to recruitment.

QRI training of PIs and recruiters will take place as needed and as indicated by QRI findings as described in 3.1.1.2 above. Findings from data collected during the QRI will be presented to the CI and TMG and a plan of action formulated to improve recruitment and information provision. Generic challenges such as how to explain study processes (e.g. randomisation) may be addressed through dissemination of 'tips and guidance' documents. Supportive feedback will be a core component of the plan of action, with the exact nature and timing dependent on the issues that arise. Site-specific feedback may cover institutional barriers, while multi-centre group feedback sessions may address widespread challenges, that would benefit from discussion. All group feedback sessions will be aided by de-identified data extracts from interviews and recorded recruitment conversations. Individual confidential feedback will also be offered, particularly where recruiters experience specific difficulties or where there is a need to discuss potentially sensitive issues. Investigator meetings and site visits may also be employed to discuss technical or clinical challenges (e.g. discomfort surrounding eligibility criteria).

#### 16.2.5.2 GCP training

For non-CTIMP (i.e. non-drug) studies all researchers are encouraged to undertake Good Clinical Practice (GCP) training in order to understand the principles of GCP. However, this is not a mandatory requirement unless deemed so by the sponsor. GCP training status for all research team members should be indicated in their respective CVs or a GCP certificate may be provided.

### 16.2.6 Confidentiality

All laboratory specimens, evaluation forms, reports, and other records must be identified in a manner designed to maintain participant confidentiality. All records must be kept in a secure storage area with limited access. The PI and research site staff involved with this study may not disclose or use for any purpose other than performance of the study, any data, record, or other unpublished information, which is confidential or identifiable, and has been disclosed to those individuals for the purpose of the study. Prior written agreement from the sponsor or its designee must be obtained for the disclosure of any said confidential information to parties not involved in the trial.

### 16.2.7 Data Protection

All PIs and research team staff (including central research team staff and qualitative research staff) involved with this study must comply with the requirements of the appropriate data protection legislation (including the General Data Protection Regulation and Data Protection Act) with regard to the collection, storage, processing and disclosure of personal information.

Computers used to collate the data will have limited access measures via user names and passwords.

Published results will not contain any personal data and be of a form where individuals are not identified and re-identification is not likely to take place.

## STUDY CONDUCT RESPONSIBILITIES

### 16.3 PROTOCOL AMENDMENTS

Any changes in research activity, except those necessary to remove an apparent, immediate hazard to the participant in the case of an urgent safety measure, must be reviewed and approved by the CI.

Amendments will be submitted to a sponsor representative for review and authorisation before being submitted in writing to the appropriate REC, and local R&D for approval prior to participants being enrolled into an amended protocol.

### 16.4 MANAGEMENT OF PROTOCOL NON-COMPLIANCE

Prospective protocol deviations, i.e. protocol waivers, will not be approved by the sponsors and therefore will not be implemented, except where necessary to eliminate an immediate hazard to study participants. If this necessitates a subsequent protocol amendment, this should be submitted to the REC, and local R&D for review and approval if appropriate.

Protocol deviations will be recorded in a protocol deviation log and logs will be submitted to the sponsors every 3 months. Each protocol violation will be reported to the sponsor within 3 days of becoming aware of the violation. All protocol deviation logs and violation forms should be emailed to [QA@accord.scot](mailto:QA@accord.scot)

Deviations and violations are non-compliance events discovered after the event has occurred. Deviation logs will be maintained for each site in multi-centre studies. An alternative frequency of deviation log submission to the sponsors may be agreed in writing with the sponsors.

The following will not be recorded as protocol deviations:

- Missed audio-recordings of conversations by research teams.
- Lack of adherence to the randomised treatment allocation.

### 16.5 SERIOUS BREACH REQUIREMENTS

A serious breach is a breach which is likely to effect to a significant degree: (a) the safety or physical or mental integrity of the participants of the trial; or(b) the scientific value of the trial.

If a potential serious breach is identified by the CI, a site PI or delegates, the co-sponsors must be notified via [seriousbreach@accord.scot](mailto:seriousbreach@accord.scot) within 24 hours. It is the

responsibility of the co-sponsors to assess the impact of the breach on the scientific value of the trial, to determine whether the incident constitutes a serious breach and report to REC as necessary.

## 16.6 STUDY RECORD RETENTION

All trial documentation will be kept for a minimum of three years from the protocol defined end of trial point. When the minimum retention period has elapsed, trial documentation will not be destroyed without permission from the sponsor.

QRI audio-recordings will be kept for at least 10 years before they will be destroyed and electronic transcripts will be stored indefinitely in secure research data storage.

## 16.7 END OF TRIAL

The end of study is defined as the last participant's last visit. This will be a 6-month follow up review.

The PIs or the co-sponsor(s) have the right at any time to terminate the study for clinical or administrative reasons.

The end of the study will be reported to the REC, and Research and Development Offices and co-sponsors within 90 days, or 15 days if the study is terminated prematurely. The PIs will inform participants if the study is closed prematurely and ensure that the appropriate follow up is arranged for all participants involved.

End of study notification will be reported to the co-sponsors via email to [resgov@accord.scot](mailto:resgov@accord.scot).

## 16.8 CONTINUATION OF TREATMENT FOLLOWING THE END OF STUDY

There are no provisions for ancillary or care for participants after the trial ends, because the interventions in the CARE pilot trial are provided in standard clinical practice and aftercare will occur as normal in standard practice.

## 16.9 INSURANCE AND INDEMNITY

The co-sponsors are responsible for ensuring proper provision has been made for insurance or indemnity to cover their liability and the liability of the CI and staff. The following arrangements are in place to fulfil the co-sponsors' responsibilities:

- The protocol has been designed by the CI, researchers employed by the University and the TMG. The University has insurance in place (which includes no-fault compensation) for negligent harm caused by poor protocol design by the CI and researchers employed by the University.
- Sites participating in the study will be liable for clinical negligence and other negligent harm to individuals taking part in the study and covered by the duty of care owed to them by the sites concerned. The co-sponsors require individual sites participating in the study to arrange for their own insurance or indemnity in respect of these liabilities.
- Sites which are part of the United Kingdom's National Health Service will have the benefit of NHS Indemnity.

- Sites outside the United Kingdom may be responsible for arranging their own indemnity or insurance for their participation in the study, and will be responsible for compliance with local law applicable to their participation in the study.

## 17 REPORTING, PUBLICATIONS AND NOTIFICATION OF RESULTS

### 17.1 AUTHORSHIP POLICY AND REPORTING

On completion of the study, the study data will be analysed and tabulated, and a clinical study report will be prepared in accordance with the International Conference on Harmonisation guidelines.

A final research report will be prepared as required by the funder. A summary report of the study will be provided to the REC within one year of the end of the study.

The success of the CARE pilot trial will be determined by the collaboration of a large number of doctors, nurses, other health professionals, patients, relatives, and the patient support organisation CAUK. For this reason, the credit for the main results will be given, not exclusively to the TMG, but to all collaborators with the trial. The primary trial publication will be drafted by a writing committee drawn from the TMG, whose membership has been approved by the TSC. Authorship will be under a group name for the CARE pilot trial collaboration and include the writing committee. People included on active sites' delegation logs will be included in any listing of collaborators in trial publications. The manuscript will be approved by the TSC before submission for publication.

### 17.2 PUBLICATION AND DISSEMINATION

Publications will be managed in line with funder requirements. We will submit manuscripts to peer reviewed journals, describing the findings of the QuinteT recruitment intervention and the CARE pilot trial (in addition to the final report for publication in the HTA journal). We will pay for these papers to be published open access. We will also present our findings at meetings of the Association of British Neurologists, the Society of British Neurological Surgeons, the British Paediatric Neurosurgery Society, and the British Paediatric Neurology Association.

We will disseminate a plain English summary of the findings of the CARE pilot trial to participants and public audiences with input from, and acknowledgement of, the Patient Advisory Group. We will offer to present our project and its findings to the annual meetings of CAUK, which is a national event that gives people affected by cavernoma a voice to talk about the issues that matter to them. We will produce an easy access report of our findings to share with the public and patients, and we will post it in the public domain on the CAUK website. We will keep the public, patients, and carers informed about study progress and results via social media channels (Facebook and Twitter).

### 17.3 DATA SHARING

Ownership of the data arising from this study resides with the study team.

1  
2 Following publication of the primary paper, a de-identified individual participant data  
3 set will be prepared for sharing purposes. All data requests should be submitted to  
4 the CI for consideration. Access to de-identified data may be granted following review  
5 by CI and TMG.  
6

7 Data collected during PAG discussions or in QuinteT recruitment intervention data  
8 collection with patients may include quotes that will be useful to CAUK in producing  
9 or optimising existing patient or carer information; where participant consent has  
10 been given, these data (after removing or disguising identifiers) will be made  
11 available by the QuinteT research group in Bristol to CAUK in order to maximise their  
12 impact.  
13

14 At the end of the study, QRI audio-recordings will be kept for at least 10 years before  
15 they will be destroyed. Transcripts will be stored indefinitely in secure research data  
16 storage, which can be accessed by approved individuals who are interested in  
17 conducting their own analyses of the data. These individuals will have to submit an  
18 application to do this, which will be assessed by an independent committee.  
19 However, all data will have identifiable information removed before they are made  
20 available, and there will be no way to identify individuals mentioned in  
21 interviews/appointments.  
22  
23  
24  
25  
26  
27  
28  
29  
30  
31  
32  
33  
34  
35  
36  
37  
38  
39  
40  
41  
42  
43  
44  
45  
46  
47  
48  
49  
50  
51  
52  
53  
54  
55  
56  
57  
58  
59  
60

# 18 TRIAL TIMELINE

| Phase                                                                        | START-UP              |        |        |        |        |        |        |        |        |        | RECRUITMENT AND FOLLOW-UP |        |        |        |        |        |           |        |        |        |        |        |        |        |        |        | COMPLETION               |        |        |        |        |        |        |        |        |        |
|------------------------------------------------------------------------------|-----------------------|--------|--------|--------|--------|--------|--------|--------|--------|--------|---------------------------|--------|--------|--------|--------|--------|-----------|--------|--------|--------|--------|--------|--------|--------|--------|--------|--------------------------|--------|--------|--------|--------|--------|--------|--------|--------|--------|
| Milestones                                                                   | Trial and site set-up |        |        |        |        |        |        |        |        |        | Qualitative research      |        |        |        |        |        | Follow-up |        |        |        |        |        |        |        |        |        | Analysis & dissemination |        |        |        |        |        |        |        |        |        |
| Project Month                                                                | 1                     | 2      | 3      | 4      | 5      | 6      | 7      | 8      | 9      | 10     | 11                        | 12     | 13     | 14     | 15     | 16     | 17        | 18     | 19     | 20     | 21     | 22     | 23     | 24     | 25     | 26     | 27                       | 28     | 29     | 30     | 31     | 32     | 33     | 34     | 35     | 36     |
| Calendar Month                                                               | Sep-20                | Oct-20 | Nov-20 | Dec-20 | Jan-21 | Feb-21 | Mar-21 | Apr-21 | May-21 | Jun-21 | Jul-21                    | Aug-21 | Sep-21 | Oct-21 | Nov-21 | Dec-21 | Jan-22    | Feb-22 | Mar-22 | Apr-22 | May-22 | Jun-22 | Jul-22 | Aug-22 | Sep-22 | Oct-22 | Nov-22                   | Dec-22 | Jan-23 | Feb-23 | Mar-23 | Apr-23 | May-23 | Jun-23 | Jul-23 | Aug-23 |
| Trial management group meetings                                              | [Dark Grey Bar]       |        |        |        |        |        |        |        |        |        |                           |        |        |        |        |        |           |        |        |        |        |        |        |        |        |        |                          |        |        |        |        |        |        |        |        |        |
| PPI advisory group meetings                                                  | [Dark Grey Bar]       |        |        |        |        |        |        |        |        |        |                           |        |        |        |        |        |           |        |        |        |        |        |        |        |        |        |                          |        |        |        |        |        |        |        |        |        |
| Trial steering committee meetings                                            | [Dark Grey Bar]       |        |        |        |        |        |        |        |        |        |                           |        |        |        |        |        |           |        |        |        |        |        |        |        |        |        |                          |        |        |        |        |        |        |        |        |        |
| Data monitoring committee meetings                                           | [Dark Grey Bar]       |        |        |        |        |        |        |        |        |        |                           |        |        |        |        |        |           |        |        |        |        |        |        |        |        |        |                          |        |        |        |        |        |        |        |        |        |
| Employ staff                                                                 | [Dark Blue Bar]       |        |        |        |        |        |        |        |        |        |                           |        |        |        |        |        |           |        |        |        |        |        |        |        |        |        |                          |        |        |        |        |        |        |        |        |        |
| Develop trial protocol                                                       | [Dark Blue Bar]       |        |        |        |        |        |        |        |        |        |                           |        |        |        |        |        |           |        |        |        |        |        |        |        |        |        |                          |        |        |        |        |        |        |        |        |        |
| Submit trial protocol (NIHR milestone)                                       | [Dark Blue Bar]       |        |        |        |        |        |        |        |        |        |                           |        |        |        |        |        |           |        |        |        |        |        |        |        |        |        |                          |        |        |        |        |        |        |        |        |        |
| Submit trial registration information (NIHR milestone)                       | [Dark Blue Bar]       |        |        |        |        |        |        |        |        |        |                           |        |        |        |        |        |           |        |        |        |        |        |        |        |        |        |                          |        |        |        |        |        |        |        |        |        |
| Case report forms                                                            | [Dark Blue Bar]       |        |        |        |        |        |        |        |        |        |                           |        |        |        |        |        |           |        |        |        |        |        |        |        |        |        |                          |        |        |        |        |        |        |        |        |        |
| Trial database                                                               | [Dark Blue Bar]       |        |        |        |        |        |        |        |        |        |                           |        |        |        |        |        |           |        |        |        |        |        |        |        |        |        |                          |        |        |        |        |        |        |        |        |        |
| Regulatory approvals                                                         | [Dark Blue Bar]       |        |        |        |        |        |        |        |        |        |                           |        |        |        |        |        |           |        |        |        |        |        |        |        |        |        |                          |        |        |        |        |        |        |        |        |        |
| Provide Evidence of Clinical Trials Authorisation (NIHR milestone)           | [Dark Blue Bar]       |        |        |        |        |        |        |        |        |        |                           |        |        |        |        |        |           |        |        |        |        |        |        |        |        |        |                          |        |        |        |        |        |        |        |        |        |
| Provide Evidence of Ethical Approval (NIHR milestone)                        | [Dark Blue Bar]       |        |        |        |        |        |        |        |        |        |                           |        |        |        |        |        |           |        |        |        |        |        |        |        |        |        |                          |        |        |        |        |        |        |        |        |        |
| Site contracts, training, initiation                                         | [Light Blue Bar]      |        |        |        |        |        |        |        |        |        |                           |        |        |        |        |        |           |        |        |        |        |        |        |        |        |        |                          |        |        |        |        |        |        |        |        |        |
| QuinteT qualitative researcher(s)                                            | [Light Blue Bar]      |        |        |        |        |        |        |        |        |        |                           |        |        |        |        |        |           |        |        |        |        |        |        |        |        |        |                          |        |        |        |        |        |        |        |        |        |
| QuinteT recruitment intervention                                             | [Light Blue Bar]      |        |        |        |        |        |        |        |        |        |                           |        |        |        |        |        |           |        |        |        |        |        |        |        |        |        |                          |        |        |        |        |        |        |        |        |        |
| QuinteT qualitative study with patients/carers, doctors                      | [Light Blue Bar]      |        |        |        |        |        |        |        |        |        |                           |        |        |        |        |        |           |        |        |        |        |        |        |        |        |        |                          |        |        |        |        |        |        |        |        |        |
| QuinteT training workshops                                                   | [Light Blue Bar]      |        |        |        |        |        |        |        |        |        |                           |        |        |        |        |        |           |        |        |        |        |        |        |        |        |        |                          |        |        |        |        |        |        |        |        |        |
| Screened, eligible, approached, consented, randomised (SEAR) data collection | [Yellow Bar]          |        |        |        |        |        |        |        |        |        |                           |        |        |        |        |        |           |        |        |        |        |        |        |        |        |        |                          |        |        |        |        |        |        |        |        |        |
| Trial recruitment                                                            | [Orange Bar]          |        |        |        |        |        |        |        |        |        |                           |        |        |        |        |        |           |        |        |        |        |        |        |        |        |        |                          |        |        |        |        |        |        |        |        |        |
| Trial baseline imaging data collection                                       | [Yellow Bar]          |        |        |        |        |        |        |        |        |        |                           |        |        |        |        |        |           |        |        |        |        |        |        |        |        |        |                          |        |        |        |        |        |        |        |        |        |
| Trial clinical and brain imaging follow-up data collection                   | [Yellow Bar]          |        |        |        |        |        |        |        |        |        |                           |        |        |        |        |        |           |        |        |        |        |        |        |        |        |        |                          |        |        |        |        |        |        |        |        |        |
| Brain imaging review and data collection                                     | [Yellow Bar]          |        |        |        |        |        |        |        |        |        |                           |        |        |        |        |        |           |        |        |        |        |        |        |        |        |        |                          |        |        |        |        |        |        |        |        |        |
| Qualitative and quantitative analysis of SEAR data                           | [Dark Blue Bar]       |        |        |        |        |        |        |        |        |        |                           |        |        |        |        |        |           |        |        |        |        |        |        |        |        |        |                          |        |        |        |        |        |        |        |        |        |
| Site close out                                                               | [Light Purple Bar]    |        |        |        |        |        |        |        |        |        |                           |        |        |        |        |        |           |        |        |        |        |        |        |        |        |        |                          |        |        |        |        |        |        |        |        |        |
| Analysis                                                                     | [Dark Blue Bar]       |        |        |        |        |        |        |        |        |        |                           |        |        |        |        |        |           |        |        |        |        |        |        |        |        |        |                          |        |        |        |        |        |        |        |        |        |
| Reports to NIHR HTA                                                          | [Green Bar]           |        |        |        |        |        |        |        |        |        |                           |        |        |        |        |        |           |        |        |        |        |        |        |        |        |        |                          |        |        |        |        |        |        |        |        |        |
| Archiving                                                                    | [Green Bar]           |        |        |        |        |        |        |        |        |        |                           |        |        |        |        |        |           |        |        |        |        |        |        |        |        |        |                          |        |        |        |        |        |        |        |        |        |
| Conference and publication                                                   | [Green Bar]           |        |        |        |        |        |        |        |        |        |                           |        |        |        |        |        |           |        |        |        |        |        |        |        |        |        |                          |        |        |        |        |        |        |        |        |        |
| Public dissemination                                                         | [Green Bar]           |        |        |        |        |        |        |        |        |        |                           |        |        |        |        |        |           |        |        |        |        |        |        |        |        |        |                          |        |        |        |        |        |        |        |        |        |

Footnote: Trial delivery timings are targets, variations will not be recorded as a protocol deviation/violation.



## 19 PROTOCOL VERSION CONTROL HISTORY

### 19.1 Version 1.0 (29Jan2021)

Original sponsor-approved version, submitted as part of application for REC review.

### 19.2 Version 2.0 (22Mar2021)

Protocol updated following REC meeting comments. Summary of changes:

- REC reference added to cover page table (page 1).
- Specific reference to Gamma Knife stereotactic radiosurgery added throughout and clarification added that neurosurgery and Gamma Knife stereotactic radiosurgery will be used according to their availability in clinical practice (section 3, 7 and throughout).
- Clarification added that imaging studies performed because of the occurrence of an outcome event will be collected by the research team and uploaded to the scan database for the trial (section 8.1.6)
- Trial timeline added (section 18).
- Version history table added (section 19).

## 20 REFERENCES

1. Labauge P, Denier C, Bergametti F, Tournier-Lasserre E. Genetics of cavernous angiomas. *Lancet Neurol*. 2007, Vol. 6, 3, pp. 237-244.
2. Morris Z, Whiteley WN, Longstreth WT, Jr., Weber F, Lee YC, Tsushima Y, et al. Incidental findings on brain magnetic resonance imaging: systematic review and meta-analysis. *BMJ*. 2009, Vol. 339, b3016.
3. Al-Shahi Salman R, Berg MJ, Morrison L, Awad IA, Angioma Alliance Scientific Advisory Board. Hemorrhage from cavernous malformations of the brain: definition and reporting standards. *Stroke*. 2008, Vol. 39, 12, pp. 3222-30.
4. Al-Shahi R, Bhattacharya JJ, Currie DG, Papanastassiou V, Ritchie V, Roberts RC, et al. Prospective, population-based detection of intracranial vascular malformations in adults: the Scottish Intracranial Vascular Malformation Study (SIVMS). *Stroke*. 2003, Vol. 34, 5, pp. 1163-1169.
5. Horne MA, Flemming KD, Su IC, Stapf C, Jeon JP, Li D, et al. Clinical course of untreated cerebral cavernous malformations: a meta-analysis of individual patient data. *Lancet Neurol*. 2016, Vol. 15, 2, pp. 166-173.
6. Josephson CB, Leach JP, Duncan R, Roberts RC, Counsell CE, Al-Shahi Salman R, et al. Seizure risk from cavernous or arteriovenous malformations: prospective population-based study. *Neurology*. 2011, Vol. 76, 8, pp. 1548-1554.
7. Miller CE, Quayyum Z, McNamee P, Al-Shahi Salman R, SIVMS Steering Committee. Economic burden of intracranial vascular malformations in adults: prospective population-based study. *Stroke*. 2009, Vol. 40, 6, pp. 1973-1979.
8. Samarasekera N, Poorthuis M, Kontoh K, Stuart I, Respinge C, Berg J, et al. Guidelines for the management of cerebral cavernous malformations in adults. . *Genetic Alliance UK & Cavernoma Alliance UK*. 2012.
9. Moultrie F, Horne MA, Josephson CB, Hall JM, Counsell CE, Bhattacharya JJ, et al. Outcome after surgical or conservative management of cerebral cavernous malformations. *Neurology*. 2014, Vol. 83, 7, pp. 582-589.
10. Bicalho VC, Bergmann A, Domingues F, Frossard JT, de Souza J. Cerebral Cavernous Malformations: Patient-Reported Outcome Validates Conservative Management. *Cerebrovasc Dis*. 2017, Vol. 44, 5-6, pp. 313-319.
11. Polster SP, Cao Y, Carroll T, Flemming K, Girard R, Hanley D, et al. Trial Readiness in Cavernous Angiomas With Symptomatic Hemorrhage (CASH). *Neurosurgery*. 2019, Vol. 84, 4, pp. 954-964.
12. Qiao N, Ma Z, Song J, Wang Y, Shou X, Zhang X, et al. A systematic review and meta-analysis of surgeries performed for treating deep-seated cerebral cavernous malformations. 2015, Vol. 29, 4, pp. 493-499.
13. Poorthuis M, Rinkel LA, Lammy S, Al-Shahi Salman R. Stereotactic radiosurgery for cerebral cavernous malformations: a systematic review and meta-analysis. *Neurology*. 2019, Vol. (in press).
14. Poorthuis M, Samarasekera N, Kontoh K, Stuart I, Cope B, Kitchen N, et al. Comparative studies of the diagnosis and treatment of cerebral cavernous malformations in adults: systematic review. . *Acta Neurochir (Wien)* . 2013, Vol. 155, 4, pp. 643-649.
15. Akers A, Al-Shahi Salman R, I AA, Dahlem K, Flemming K, Hart B, et al. Synopsis of Guidelines for the Clinical Management of Cerebral Cavernous Malformations: Consensus Recommendations Based on Systematic Literature Review by the Angioma Alliance Scientific Advisory Board Clinical Experts Panel. *Neurosurgery*. 2017, Vol. 80, 5, pp. 665-680.
16. Rooshenas L, Paramasivan S, Jepson M, Donovan JL. Intensive Triangulation of Qualitative Research and Quantitative Data to Improve Recruitment to Randomized Trials: The QuinteT Approach. *Qual Health Res*. 2019, Vol. 29, 5, pp. 672-679.

- 1  
2  
3 17. **Glasziou P, Chalmers I, Rawlins M, McCulloch P.** When are randomised trials  
4 unnecessary? Picking signal from noise. *BMJ.* 2007, Vol. 334, 7589, pp. 349-351.  
5 18. **Poorthuis MH, Klijn CJ, Algra A, Rinkel GJ, Al-Shahi Salman R.** Treatment of  
6 cerebral cavernous malformations: a systematic review and meta-regression  
7 analysis. *J Neurol Neurosurg Psychiatry.* 2014, Vol. 85, 12, pp. 1319-1323.  
8 19. **Rinkel LA, Al-Shahi Salman R, Rinkel GJ, Greving JP.** Radiosurgical,  
9 neurosurgical, or no intervention for cerebral cavernous malformations: A decision  
10 analysis. *Int J Stroke.* 2019, Vol. (in press).  
11 20. **Esposito P, Coulbois S, Kehrl P, Boyer P, Dietemann JL, Rousseaux P, et**  
12 **al.** Place of the surgery in the management of brainstem cavernomas. Results of a  
13 multicentric study]. *Neurochirurgie.* Vol. 49, 1, pp. 5-12.  
14 21. **Mathiesen T, Edner G, Kihlstrom L.** Deep and brainstem cavernomas: a  
15 consecutive 8-year series. *J Neurosurg.* 2003, Vol. 99, 1, pp. 31-37.  
16 22. **Tarnaris A, Fernandes RP, Kitchen ND.** Does conservative management for  
17 brain stem cavernomas have better long-term outcome? *Br J Neurosurg.* 2008, Vol.  
18 22, 6, pp. 748-757.  
19 23. **Huang AP, Chen JS, Yang CC, Wang KC, Yang SH, Lai DM, et al.** Brain stem  
20 cavernous malformations. *J Clin Neurosci.* 2010, Vol. 17, 1, pp. 74-79.  
21 24. **Kivelev J, Niemela M, Kivisaari R, Dashti R, Laakso A, Hernesniemi J.** Long-  
22 term outcome of patients with multiple cerebral cavernous malformations.  
23 *Neurosurgery.* 2009, Vol. 65, 3, pp. 450-455.  
24 25. **Kida Y, Hasegawa T, Kato T, Sato T, Nagai H, Hishikawa T, et al.** Natural  
25 History of Symptomatic Cavernous Malformations and Results of Surgery. *Jpn J*  
26 *Neurosurg (Tokyo).* 2015, Vol. 24, pp. 108-118.  
27 26. **Yoon PH, Kim DI, Jeon P, Ryu YH, Hwang GJ, Park SJ.** Cerebral cavernous  
28 malformations: serial magnetic resonance imaging findings in patients with and  
29 without gamma knife surgery. *Neurol Med Chir (Tokyo).* 1998, Vol. 38, Suppl, pp.  
30 255-261.  
31 27. **Lu XY, Sun H, Xu JG, Li QY.** Stereotactic radiosurgery of brainstem cavernous  
32 malformations: a systematic review and meta-analysis. *J Neurosurg.* 2014, Vol. 120,  
33 4, pp. 982-987.  
34 28. **Al-Shahi Salman R, Kitchen N, Thomson J, Ganesan V, Mallucci C, Radatz**  
35 **M, et al.** Top ten research priorities for brain and spine cavernous malformations.  
36 *Lancet Neurol.* 2016, Vol. 15, 4, pp. 354-355.  
37 29. **Stereotactic, NHS England Clinical Reference Group for.** *Clinical*  
38 *Commissioning Policy: Stereotactic Radiosurgery / Radiotherapy for Cavernous*  
39 *Venous Malformations (Cavernomas).* s.l. : NHS England, 2013. p. D05/P/g.  
40 30. **Raymond J, Darsaut TE, Molyneux AJ, Team collaborative Group.** A trial on  
41 unruptured intracranial aneurysms (the TEAM trial): results, lessons from a failure  
42 and the necessity for clinical care trials. *Trials.* 2015, Vol. 10, 8, p. e0136619.  
43 31. **Magro E, Gentric JC, Darsaut TE, Ziegler D, Bojanowski MW, Raymond J.**  
44 Responses to ARUBA: a systematic review and critical analysis for the design of  
45 future arteriovenous malformation trials. *J Neurosurg.* 2 126 2017, Vols. 486-494.  
46 32. **Donovan JL, Paramasivan S, de Salis I, Toerien M.** Clear obstacles and  
47 hidden challenges: understanding recruiter perspectives in six pragmatic randomised  
48 controlled trials. *Trials.* 2014, Vol. 15, 5.  
49 33. **Beasant L, Brigden A, Parslow RM, Apperley H, Keep T, Northam A, et al.**  
50 Treatment preference and recruitment to pediatric RCTs: A systematic review.  
51 *Contemp Clin Trials Commun.* 2019, Vol. 14, 100335.  
52 34. **Donovan JL, Rooshenas L, Jepson M, Elliott D, Wade J, Avery K, et al.**  
53 Optimising recruitment and informed consent in randomised controlled trials: the  
54 development and implementation of the Quintet Recruitment Intervention (QRI).  
55 *Trials.* 2016, Vol. 17, 1, p. 283.  
56 35. **Donovan J, Mills N, Smith M, Brindle L, Jacoby A, Peters T, et al.** Quality  
57 improvement report: Improving design and conduct of randomised trials by  
58 embedding them in qualitative research: ProtecT (prostate testing for cancer and  
59 treatment) study. *BMJ.* 2002, Vol. 325, 7367, pp. 766-770.  
60

- 1  
2  
3  
4  
5  
6  
7  
8  
9  
10  
11  
12  
13  
14  
15  
16  
17  
18  
19  
20  
21  
22  
23  
24  
25  
26  
27  
28  
29  
30  
31  
32  
33  
34  
35  
36  
37  
38  
39  
40  
41  
42  
43  
44  
45  
46  
47  
48  
49  
50  
51  
52  
53  
54  
55  
56  
57  
58  
59  
60
36. **Mills N, Donovan JL, Wade J, Hamdy FC, Neal DE, Lane JA.** Exploring treatment preferences facilitated recruitment to randomized controlled trials. *J Clin Epidemiol.* 2011, Vol. 64, 10, pp. 1127-1136.
37. **Mills N, Gaunt D, Blazeby JM, Elliott D, Husbands S, Holding P, et al.** Training health professionals to recruit into challenging randomized controlled trials improved confidence: the development of the QuinteT randomized controlled trial recruitment training intervention. *J Clin Epidemiol.* 2018, Vol. 95, pp. 34-44.
38. **Paramasivan S, Huddart R, Hall E, Lewis R, Birtle A, Donovan JL.** Key issues in recruitment to randomised controlled trials with very different interventions: a qualitative investigation of recruitment to the SPARE trial (CRUK/07/011). *T. Trials.* 2011, Vol. 12, 78.
39. **Rooshenas L, Scott LJ, Blazeby JM, Rogers CA, Tilling KM, Husbands S, et al.** The QuinteT Recruitment Intervention supported five randomized trials to recruit to target: a mixed- methods evaluation. *J Clin Epidemiol.* 2019, Vol. 106, pp. 108-120.
40. **Mills N, Blazeby JM, Hamdy FC, Neal DE, Campbell B, Wilson C, et al.** Training recruiters to randomized trials to facilitate recruitment and informed consent by exploring patients' treatment preferences. *Trials.* 2014, Vol. 15, 323.
41. **Willie JT, Malcolm JG, Stern MA, Lowder LO, Neill SG, Cabaniss BT, et al.** Safety and effectiveness of stereotactic laser ablation for epileptogenic cerebral cavernous malformations. *Epilepsia.* 2019, Vol. 60, 2, pp. 220-232.
42. **Treweek S, Pitkethly M, Cook J, Fraser C, Mitchell E, Sullivan F, et al.** Strategies to improve recruitment to randomised trials. *Cochrane Database Syst Rev* 2018. 2018, Vol. 2, MR000013.
43. **Rigamonti D, Drayer D P, Johnson P C, Hadley N M, Zabramski J, Spetzler, R F.** The MRI appearance of cavernous malformations (angiomas). *J Neurosurg.* 1987, Vol. 67, 4, pp. 518-524.
44. **Rosenow F, Alonso-Vanegas M A, Baumgartner C, Blümcke I, Carreño M, Gizewksi, E R, Hamer, H M, Knake S, Kahane P, Lüders H O, Mathern G W, Menzler K, Miller J, Otsuki T, Ozkara C, Pitkänen A, Roper S N, Sakamoto A C, Sure U, Walker M C, Steinhoff B J, Sur.** Cavernoma-related epilepsy: review and recommendations for management--report of the Surgical Task Force of the ILAE Commission on Therapeutic Strategies. *Epilepsia.* 2013, Vol. 54, 12, pp. 2025-2035.
45. **Authority, Health Research.** Applying a proportionate approach to the process of seeking consent (V1.01). [Online] 17 January 2017. [Cited: 22 September 2020.] <https://www.hra.nhs.uk/media/documents/applying-proportionate-approach-process-seeking-consent.pdf>.
46. **Principles of consent: Children and Young People (England, Wales and Northern Ireland).** *Health Research Authority.* [Online] [Cited: 21 September 2020.] <http://www.hra-decisiontools.org.uk/consent/principles-children-EngWalesNI.html>.
47. **Principles of consent: Children and Young People (Scotland).** *Health Research Authority.* [Online] [Cited: 21 September 2020.] <http://www.hra-decisiontools.org.uk/consent/principles-children-Scotland.html>.
48. **National Consent Advisory Group.** *National Consent Policy V1.3 (June 2019).* s.l. : Health Service Executive, 2019.
49. **Chohan MO, Marchio S, Morrison LA, Sidman RL, Cavenee WK, Dejana E, et al.** Emerging Pharmacologic Targets in Cerebral Cavernous Malformation and Potential Strategies to Alter the Natural History of a Difficult Disease: A Review. *JAMA Neurol.* 2019, Vol. 76, 4, pp. 492-500.
50. **The Mental Capacity Act 2005 (Loss of Capacity during Research Project) (England) Regulations 2007.** <https://www.legislation.gov.uk/uksi/2007/679/schedule/2/made>. [Online] [Cited: 20 January 2020.]
51. **S M Eldridge, C L Chan, M J Campbell, C M Bond, S Hopewell, LThabane, G A Lancaster on behalf of the PAFS consensus group.** CONSORT 2010 statement: extension to randomised pilot and feasibility trials. *BMJ.* 2016, Vol. 355, i5239.

- 1  
2 **52. Herdman M, Gudex C, Lloyd A, Janssen M, Kind P, Parkin D, et al.**  
3 **Development and preliminary testing of the new five-level version of EQ-5D**  
4 **(EQ-5D-5L). *Qual Life Res.* 2011, Vol. 20, 10, pp. 1727-1736.**  
5 **53. Wade, J, Donovan, JL, Lane, JA, Neal, DE, Hamdy, FC. It's not just what you**  
6 **say, it's also how you say it: opening the 'black box' of informed consent**  
7 **appointments in randomised controlled trials. *Social Science and Medicine***  
8 **(1982). 2018-2028, 2009, Vol. 68, 11, pp. 2018-2028.**  
9 **54. Paramasivan, S, Strong, S, Wilson, C, Campbell, B, Blazeby, JM, Donovan,**  
10 **JL. A simple technique to identify key recruitment issues in randomised**  
11 **controlled trials. *Trials.* 2015, Vol. 16, 88.**  
12 **55. Strauss, A, Corbin, J. *Grounded theory methodology. Handbook of***  
13 ***qualitative research* . s.l. : Sage Publications Inc, 1994. pp. 273-85.**  
14 **56. Royston P, Parmar MK. Restricted mean survival time: an alternative to the**  
15 **hazard ratio for the design and analysis of randomized trials with a time-to-**  
16 **event outcome. *BMC Med Res Methodol.* 2013, Vol. 13, 152.**  
17 **57. Zanello M, Meyer B, Still M, Goodden JR, Colle H, Schichor C, et al. Surgical**  
18 **resection of cavernous angioma located within eloquent brain areas:**  
19 **International survey of the practical management among 19 specialized**  
20 **centers. *Seizure.* 2019, Vol. 69, pp. 31-40.**  
21 **58. Wilson C, Rooshenas L, Paramasivan S, Elliott D, Jepson M, Strong S, et al.**  
22 **Development of a framework to improve the process of recruitment to**  
23 **randomised controlled trials (RCTs): the SEAR (Screened, Eligible,**  
24 **Approached, Randomised) framework. *Trials.* 2018, Vol. 19, 1, p. 50.**  
25 **59. Rooshenas L, Elliott D, Wade J, Jepson M, Paramasivan S, Strong S, et al.**  
26 **Conveying Equipose during Recruitment for Clinical Trials: Qualitative**  
27 **Synthesis of Clinicians' Practices across Six Randomised Controlled Trials.**  
28 ***PLoS Med* . :e1002147, 2016, Vol. 13, 10, p. e1002147.**  
29  
30  
31  
32  
33  
34  
35  
36  
37  
38  
39  
40  
41  
42  
43  
44  
45  
46  
47  
48  
49  
50  
51  
52  
53  
54  
55  
56  
57  
58  
59  
60

# Reporting checklist for protocol of a clinical trial.

Based on the SPIRIT guidelines.

## Instructions to authors

Complete this checklist by entering the page numbers from your manuscript where readers will find each of the items listed below.

Your article may not currently address all the items on the checklist. Please modify your text to include the missing information. If you are certain that an item does not apply, please write "n/a" and provide a short explanation.

Upload your completed checklist as an extra file when you submit to a journal.

In your methods section, say that you used the SPIRIT reporting guidelines, and cite them as:

Chan A-W, Tetzlaff JM, Gøtzsche PC, Altman DG, Mann H, Berlin J, Dickersin K, Hróbjartsson A, Schulz KF, Parulekar WR, Krleža-Jerić K, Laupacis A, Moher D. SPIRIT 2013 Explanation and Elaboration: Guidance for protocols of clinical trials. *BMJ*. 2013;346:e7586

|                                             | Reporting Item                                                                                                                  | Page Number |
|---------------------------------------------|---------------------------------------------------------------------------------------------------------------------------------|-------------|
| <b>Administrative information</b>           |                                                                                                                                 |             |
| Title                                       | <a href="#">#1</a> Descriptive title identifying the study design, population, interventions, and, if applicable, trial acronym | 1           |
| Trial registration                          | <a href="#">#2a</a> Trial identifier and registry name. If not yet registered, name of intended registry                        | 1           |
| Trial registration: data set                | <a href="#">#2b</a> All items from the World Health Organization Trial Registration Data Set                                    | 1           |
| Protocol version                            | <a href="#">#3</a> Date and version identifier                                                                                  | 1           |
| Funding                                     | <a href="#">#4</a> Sources and types of financial, material, and other support                                                  | 24          |
| Roles and responsibilities: contributorship | <a href="#">#5a</a> Names, affiliations, and roles of protocol contributors                                                     | 24          |
| Roles and                                   | <a href="#">#5b</a> Name and contact information for the trial sponsor                                                          | 1           |

responsibilities:

1 sponsor contact  
2 information

3 Roles and

4 responsibilities:

5 sponsor and funder

[#5c](#)

6 Role of study sponsor and funders, if any, in study design;  
7 collection, management, analysis, and interpretation of data;  
8 writing of the report; and the decision to submit the report for  
9 publication, including whether they will have ultimate  
10 authority over any of these activities

24

11 Roles and

12 responsibilities:

13 committees

[#5d](#)

14 Composition, roles, and responsibilities of the coordinating  
15 centre, steering committee, endpoint adjudication committee,  
16 data management team, and other individuals or groups  
17 overseeing the trial, if applicable (see Item 21a for data  
18 monitoring committee)

24 and  
supplementary

## 21 Introduction

22 Background and

23 rationale

[#6a](#)

24 Description of research question and justification for  
25 undertaking the trial, including summary of relevant studies  
26 (published and unpublished) examining benefits and harms  
27 for each intervention

7

28 Background and

29 rationale: choice of

30 comparators

[#6b](#)

31 Explanation for choice of comparators

7

32 Objectives

[#7](#)

33 Specific objectives or hypotheses

7

34 Trial design

[#8](#)

35 Description of trial design including type of trial (eg, parallel  
36 group, crossover, factorial, single group), allocation ratio, and  
37 framework (eg, superiority, equivalence, non-inferiority,  
38 exploratory)

7

## 39 Methods:

40 **Participants,**

41 **interventions, and**

42 **outcomes**

43 Study setting

[#9](#)

44 Description of study settings (eg, community clinic, academic  
45 hospital) and list of countries where data will be collected.  
46 Reference to where list of study sites can be obtained

7-8

47 Eligibility criteria

[#10](#)

48 Inclusion and exclusion criteria for participants. If applicable,

8-9

|    |                      |                                                                                   |       |
|----|----------------------|-----------------------------------------------------------------------------------|-------|
| 1  |                      | eligibility criteria for study centres and individuals who will                   |       |
| 2  |                      | perform the interventions (eg, surgeons, psychotherapists)                        |       |
| 3  |                      |                                                                                   |       |
| 4  | Interventions:       | <a href="#">#11a</a> Interventions for each group with sufficient detail to allow | 9-10  |
| 5  | description          | replication, including how and when they will be                                  |       |
| 6  |                      | administered                                                                      |       |
| 7  |                      |                                                                                   |       |
| 8  |                      |                                                                                   |       |
| 9  | Interventions:       | <a href="#">#11b</a> Criteria for discontinuing or modifying allocated            | 9-10  |
| 10 | modifications        | interventions for a given trial participant (eg, drug dose                        |       |
| 11 |                      | change in response to harms, participant request, or                              |       |
| 12 |                      | improving / worsening disease)                                                    |       |
| 13 |                      |                                                                                   |       |
| 14 |                      |                                                                                   |       |
| 15 |                      |                                                                                   |       |
| 16 | Interventions:       | <a href="#">#11c</a> Strategies to improve adherence to intervention protocols,   | 9-10  |
| 17 | adherence            | and any procedures for monitoring adherence (eg, drug tablet                      |       |
| 18 |                      | return; laboratory tests)                                                         |       |
| 19 |                      |                                                                                   |       |
| 20 |                      |                                                                                   |       |
| 21 | Interventions:       | <a href="#">#11d</a> Relevant concomitant care and interventions that are         | 10    |
| 22 | concomitant care     | permitted or prohibited during the trial                                          |       |
| 23 |                      |                                                                                   |       |
| 24 |                      |                                                                                   |       |
| 25 | Outcomes             | <a href="#">#12</a> Primary, secondary, and other outcomes, including the         | 11-12 |
| 26 |                      | specific measurement variable (eg, systolic blood pressure),                      |       |
| 27 |                      | analysis metric (eg, change from baseline, final value, time to                   |       |
| 28 |                      | event), method of aggregation (eg, median, proportion), and                       |       |
| 29 |                      | time point for each outcome. Explanation of the clinical                          |       |
| 30 |                      | relevance of chosen efficacy and harm outcomes is strongly                        |       |
| 31 |                      | recommended                                                                       |       |
| 32 |                      |                                                                                   |       |
| 33 |                      |                                                                                   |       |
| 34 |                      |                                                                                   |       |
| 35 |                      |                                                                                   |       |
| 36 | Participant timeline | <a href="#">#13</a> Time schedule of enrolment, interventions (including any      | 13-15 |
| 37 |                      | run-ins and washouts), assessments, and visits for                                |       |
| 38 |                      | participants. A schematic diagram is highly recommended                           |       |
| 39 |                      | (see Figure)                                                                      |       |
| 40 |                      |                                                                                   |       |
| 41 |                      |                                                                                   |       |
| 42 |                      |                                                                                   |       |
| 43 | Sample size          | <a href="#">#14</a> Estimated number of participants needed to achieve study      | 16    |
| 44 |                      | objectives and how it was determined, including clinical and                      |       |
| 45 |                      | statistical assumptions supporting any sample size                                |       |
| 46 |                      | calculations                                                                      |       |
| 47 |                      |                                                                                   |       |
| 48 |                      |                                                                                   |       |
| 49 |                      |                                                                                   |       |
| 50 | Recruitment          | <a href="#">#15</a> Strategies for achieving adequate participant enrolment to    | 16-17 |
| 51 |                      | reach target sample size                                                          |       |
| 52 |                      |                                                                                   |       |
| 53 |                      |                                                                                   |       |

**Methods:**  
**Assignment of**  
**interventions (for**  
**controlled trials)**



|    |                        |                      |                                                                 |       |
|----|------------------------|----------------------|-----------------------------------------------------------------|-------|
| 1  | Allocation: sequence   | <a href="#">#16a</a> | Method of generating the allocation sequence (eg, computer-     | 17    |
| 2  | generation             |                      | generated random numbers), and list of any factors for          |       |
| 3  |                        |                      | stratification. To reduce predictability of a random sequence,  |       |
| 4  |                        |                      | details of any planned restriction (eg, blocking) should be     |       |
| 5  |                        |                      | provided in a separate document that is unavailable to those    |       |
| 6  |                        |                      | who enrol participants or assign interventions                  |       |
| 7  |                        |                      |                                                                 |       |
| 8  |                        |                      |                                                                 |       |
| 9  |                        |                      |                                                                 |       |
| 10 | Allocation             | <a href="#">#16b</a> | Mechanism of implementing the allocation sequence (eg,          | 17    |
| 11 | concealment            |                      | central telephone; sequentially numbered, opaque, sealed        |       |
| 12 | mechanism              |                      | envelopes), describing any steps to conceal the sequence until  |       |
| 13 |                        |                      | interventions are assigned                                      |       |
| 14 |                        |                      |                                                                 |       |
| 15 |                        |                      |                                                                 |       |
| 16 | Allocation:            | <a href="#">#16c</a> | Who will generate the allocation sequence, who will enrol       | 17    |
| 17 | implementation         |                      | participants, and who will assign participants to interventions |       |
| 18 |                        |                      |                                                                 |       |
| 19 |                        |                      |                                                                 |       |
| 20 |                        |                      |                                                                 |       |
| 21 | Blinding (masking)     | <a href="#">#17a</a> | Who will be blinded after assignment to interventions (eg,      | 17    |
| 22 |                        |                      | trial participants, care providers, outcome assessors, data     |       |
| 23 |                        |                      | analysts), and how                                              |       |
| 24 |                        |                      |                                                                 |       |
| 25 |                        |                      |                                                                 |       |
| 26 |                        |                      |                                                                 |       |
| 27 | Blinding (masking):    | <a href="#">#17b</a> | If blinded, circumstances under which unblinding is             | NA    |
| 28 | emergency unblinding   |                      | permissible, and procedure for revealing a participant's        |       |
| 29 |                        |                      | allocated intervention during the trial                         |       |
| 30 |                        |                      |                                                                 |       |
| 31 |                        |                      |                                                                 |       |
| 32 | <b>Methods: Data</b>   |                      |                                                                 |       |
| 33 | <b>collection,</b>     |                      |                                                                 |       |
| 34 | <b>management, and</b> |                      |                                                                 |       |
| 35 | <b>analysis</b>        |                      |                                                                 |       |
| 36 |                        |                      |                                                                 |       |
| 37 |                        |                      |                                                                 |       |
| 38 |                        |                      |                                                                 |       |
| 39 | Data collection plan   | <a href="#">#18a</a> | Plans for assessment and collection of outcome, baseline, and   | 17-18 |
| 40 |                        |                      | other trial data, including any related processes to promote    |       |
| 41 |                        |                      | data quality (eg, duplicate measurements, training of           |       |
| 42 |                        |                      | assessors) and a description of study instruments (eg,          |       |
| 43 |                        |                      | questionnaires, laboratory tests) along with their reliability  |       |
| 44 |                        |                      | and validity, if known. Reference to where data collection      |       |
| 45 |                        |                      | forms can be found, if not in the protocol                      |       |
| 46 |                        |                      |                                                                 |       |
| 47 |                        |                      |                                                                 |       |
| 48 |                        |                      |                                                                 |       |
| 49 |                        |                      |                                                                 |       |
| 50 | Data collection plan:  | <a href="#">#18b</a> | Plans to promote participant retention and complete follow-     | 18    |
| 51 | retention              |                      | up, including list of any outcome data to be collected for      |       |
| 52 |                        |                      | participants who discontinue or deviate from intervention       |       |
| 53 |                        |                      | protocols                                                       |       |
| 54 |                        |                      |                                                                 |       |
| 55 |                        |                      |                                                                 |       |
| 56 |                        |                      |                                                                 |       |
| 57 | Data management        | <a href="#">#19</a>  | Plans for data entry, coding, security, and storage, including  | 18-19 |
| 58 |                        |                      | any related processes to promote data quality (eg, double data  |       |
| 59 |                        |                      |                                                                 |       |
| 60 |                        |                      |                                                                 |       |

entry; range checks for data values). Reference to where details of data management procedures can be found, if not in the protocol

|    |                                                  |                      |                      |
|----|--------------------------------------------------|----------------------|----------------------|
| 1  |                                                  |                      |                      |
| 2  |                                                  |                      |                      |
| 3  |                                                  |                      |                      |
| 4  |                                                  |                      |                      |
| 5  | Statistics: outcomes                             | <a href="#">#20a</a> | 19-21 and supplement |
| 6  |                                                  |                      |                      |
| 7  |                                                  |                      |                      |
| 8  |                                                  |                      |                      |
| 9  |                                                  |                      |                      |
| 10 | Statistics: additional analyses                  | <a href="#">#20b</a> | 19-21 and supplement |
| 11 |                                                  |                      |                      |
| 12 |                                                  |                      |                      |
| 13 |                                                  |                      |                      |
| 14 | Statistics: analysis population and missing data | <a href="#">#20c</a> | 19-21 and supplement |
| 15 |                                                  |                      |                      |
| 16 |                                                  |                      |                      |
| 17 |                                                  |                      |                      |
| 18 |                                                  |                      |                      |

## 19 **Methods:** 20 **Monitoring**

|    |                                   |                      |       |
|----|-----------------------------------|----------------------|-------|
| 21 |                                   |                      |       |
| 22 |                                   |                      |       |
| 23 | Data monitoring: formal committee | <a href="#">#21a</a> | 21    |
| 24 |                                   |                      |       |
| 25 |                                   |                      |       |
| 26 |                                   |                      |       |
| 27 |                                   |                      |       |
| 28 |                                   |                      |       |
| 29 |                                   |                      |       |
| 30 |                                   |                      |       |
| 31 |                                   |                      |       |
| 32 |                                   |                      |       |
| 33 | Data monitoring: interim analysis | <a href="#">#21b</a> | 21    |
| 34 |                                   |                      |       |
| 35 |                                   |                      |       |
| 36 |                                   |                      |       |
| 37 |                                   |                      |       |
| 38 | Harms                             | <a href="#">#22</a>  | 21-22 |
| 39 |                                   |                      |       |
| 40 |                                   |                      |       |
| 41 |                                   |                      |       |
| 42 |                                   |                      |       |
| 43 |                                   |                      |       |
| 44 | Auditing                          | <a href="#">#23</a>  | 22    |
| 45 |                                   |                      |       |
| 46 |                                   |                      |       |
| 47 |                                   |                      |       |
| 48 |                                   |                      |       |

## 49 **Ethics and** 50 **dissemination**

|    |                          |                     |       |
|----|--------------------------|---------------------|-------|
| 51 |                          |                     |       |
| 52 |                          |                     |       |
| 53 | Research ethics approval | <a href="#">#24</a> | 22-23 |
| 54 |                          |                     |       |
| 55 |                          |                     |       |
| 56 |                          |                     |       |
| 57 | Protocol amendments      | <a href="#">#25</a> | 23    |
| 58 |                          |                     |       |
| 59 |                          |                     |       |

|    |                                             |                                                                                                                                                                                                                                                                                                          |                   |
|----|---------------------------------------------|----------------------------------------------------------------------------------------------------------------------------------------------------------------------------------------------------------------------------------------------------------------------------------------------------------|-------------------|
|    |                                             | relevant parties (eg, investigators, REC / IRBs, trial participants, trial registries, journals, regulators)                                                                                                                                                                                             |                   |
| 1  |                                             |                                                                                                                                                                                                                                                                                                          |                   |
| 2  |                                             |                                                                                                                                                                                                                                                                                                          |                   |
| 3  |                                             |                                                                                                                                                                                                                                                                                                          |                   |
| 4  | Consent or assent                           | <a href="#">#26a</a> Who will obtain informed consent or assent from potential trial participants or authorised surrogates, and how (see Item 32)                                                                                                                                                        | 16                |
| 5  |                                             |                                                                                                                                                                                                                                                                                                          |                   |
| 6  |                                             |                                                                                                                                                                                                                                                                                                          |                   |
| 7  |                                             |                                                                                                                                                                                                                                                                                                          |                   |
| 8  |                                             |                                                                                                                                                                                                                                                                                                          |                   |
| 9  | Consent or assent: ancillary studies        | <a href="#">#26b</a> Additional consent provisions for collection and use of participant data and biological specimens in ancillary studies, if applicable                                                                                                                                               | 16                |
| 10 |                                             |                                                                                                                                                                                                                                                                                                          |                   |
| 11 |                                             |                                                                                                                                                                                                                                                                                                          |                   |
| 12 |                                             |                                                                                                                                                                                                                                                                                                          |                   |
| 13 |                                             |                                                                                                                                                                                                                                                                                                          |                   |
| 14 | Confidentiality                             | <a href="#">#27</a> How personal information about potential and enrolled participants will be collected, shared, and maintained in order to protect confidentiality before, during, and after the trial                                                                                                 | 18-19             |
| 15 |                                             |                                                                                                                                                                                                                                                                                                          |                   |
| 16 |                                             |                                                                                                                                                                                                                                                                                                          |                   |
| 17 |                                             |                                                                                                                                                                                                                                                                                                          |                   |
| 18 |                                             |                                                                                                                                                                                                                                                                                                          |                   |
| 19 |                                             |                                                                                                                                                                                                                                                                                                          |                   |
| 20 | Declaration of interests                    | <a href="#">#28</a> Financial and other competing interests for principal investigators for the overall trial and each study site                                                                                                                                                                        | 24 and 25         |
| 21 |                                             |                                                                                                                                                                                                                                                                                                          |                   |
| 22 |                                             |                                                                                                                                                                                                                                                                                                          |                   |
| 23 |                                             |                                                                                                                                                                                                                                                                                                          |                   |
| 24 | Data access                                 | <a href="#">#29</a> Statement of who will have access to the final trial dataset, and disclosure of contractual agreements that limit such access for investigators                                                                                                                                      | 23                |
| 25 |                                             |                                                                                                                                                                                                                                                                                                          |                   |
| 26 |                                             |                                                                                                                                                                                                                                                                                                          |                   |
| 27 |                                             |                                                                                                                                                                                                                                                                                                          |                   |
| 28 |                                             |                                                                                                                                                                                                                                                                                                          |                   |
| 29 | Ancillary and post trial care               | <a href="#">#30</a> Provisions, if any, for ancillary and post-trial care, and for compensation to those who suffer harm from trial participation                                                                                                                                                        | 10                |
| 30 |                                             |                                                                                                                                                                                                                                                                                                          |                   |
| 31 |                                             |                                                                                                                                                                                                                                                                                                          |                   |
| 32 |                                             |                                                                                                                                                                                                                                                                                                          |                   |
| 33 |                                             |                                                                                                                                                                                                                                                                                                          |                   |
| 34 | Dissemination policy: trial results         | <a href="#">#31a</a> Plans for investigators and sponsor to communicate trial results to participants, healthcare professionals, the public, and other relevant groups (eg, via publication, reporting in results databases, or other data sharing arrangements), including any publication restrictions | 23                |
| 35 |                                             |                                                                                                                                                                                                                                                                                                          |                   |
| 36 |                                             |                                                                                                                                                                                                                                                                                                          |                   |
| 37 |                                             |                                                                                                                                                                                                                                                                                                          |                   |
| 38 |                                             |                                                                                                                                                                                                                                                                                                          |                   |
| 39 |                                             |                                                                                                                                                                                                                                                                                                          |                   |
| 40 |                                             |                                                                                                                                                                                                                                                                                                          |                   |
| 41 |                                             |                                                                                                                                                                                                                                                                                                          |                   |
| 42 |                                             |                                                                                                                                                                                                                                                                                                          |                   |
| 43 | Dissemination policy: authorship            | <a href="#">#31b</a> Authorship eligibility guidelines and any intended use of professional writers                                                                                                                                                                                                      | 23                |
| 44 |                                             |                                                                                                                                                                                                                                                                                                          |                   |
| 45 |                                             |                                                                                                                                                                                                                                                                                                          |                   |
| 46 |                                             |                                                                                                                                                                                                                                                                                                          |                   |
| 47 | Dissemination policy: reproducible research | <a href="#">#31c</a> Plans, if any, for granting public access to the full protocol, participant-level dataset, and statistical code                                                                                                                                                                     | 23                |
| 48 |                                             |                                                                                                                                                                                                                                                                                                          |                   |
| 49 |                                             |                                                                                                                                                                                                                                                                                                          |                   |
| 50 | <b>Appendices</b>                           |                                                                                                                                                                                                                                                                                                          |                   |
| 51 |                                             |                                                                                                                                                                                                                                                                                                          |                   |
| 52 |                                             |                                                                                                                                                                                                                                                                                                          |                   |
| 53 | Informed consent materials                  | <a href="#">#32</a> Model consent form and other related documentation given to participants and authorised surrogates                                                                                                                                                                                   | 16 and supplement |
| 54 |                                             |                                                                                                                                                                                                                                                                                                          |                   |
| 55 |                                             |                                                                                                                                                                                                                                                                                                          |                   |
| 56 |                                             |                                                                                                                                                                                                                                                                                                          |                   |
| 57 | Biological specimens                        | <a href="#">#33</a> Plans for collection, laboratory evaluation, and storage of biological specimens for genetic or molecular analysis in the                                                                                                                                                            | NA                |
| 58 |                                             |                                                                                                                                                                                                                                                                                                          |                   |
| 59 |                                             |                                                                                                                                                                                                                                                                                                          |                   |
| 60 |                                             |                                                                                                                                                                                                                                                                                                          |                   |

1 current trial and for future use in ancillary studies, if  
2 applicable  
3

4 Notes:  
5

- 6 • 5d: 24 and supplementary  
7
- 8 • 20a: 19-21 and supplement  
9
- 10 • 20b: 19-21 and supplement  
11
- 12 • 20c: 19-21 and supplement  
13
- 14 • 32: 16 and supplement The SPIRIT Explanation and Elaboration paper is distributed under the terms of the  
15 Creative Commons Attribution License CC-BY-NC. This checklist was completed on 16. April 2023 using  
16 <https://www.goodreports.org/>, a tool made by the [EQUATOR Network](#) in collaboration with [Penelope.ai](#)  
17  
18  
19  
20  
21  
22  
23  
24  
25  
26  
27  
28  
29  
30  
31  
32  
33  
34  
35  
36  
37  
38  
39  
40  
41  
42  
43  
44  
45  
46  
47  
48  
49  
50  
51  
52  
53  
54  
55  
56  
57  
58  
59  
60

# BMJ Open

## **Cavernomas A Randomised Effectiveness (CARE) pilot trial, to address the effectiveness of active treatment (with neurosurgery or stereotactic radiosurgery) versus conservative management in people with symptomatic brain cavernoma: Study protocol**

|                               |                                                                                                                                                                                                                                                                                                                                                                                                                                                                                                                                                                                                                                                                                                                                                                                                                                                                                                                                                                                                                                                                                                                                                                                                                                                                                                                                                                                                                                                                                                                                                                                                                                                                                                                                                                                                                                                                                                                                                                                                                                                                                                                                              |
|-------------------------------|----------------------------------------------------------------------------------------------------------------------------------------------------------------------------------------------------------------------------------------------------------------------------------------------------------------------------------------------------------------------------------------------------------------------------------------------------------------------------------------------------------------------------------------------------------------------------------------------------------------------------------------------------------------------------------------------------------------------------------------------------------------------------------------------------------------------------------------------------------------------------------------------------------------------------------------------------------------------------------------------------------------------------------------------------------------------------------------------------------------------------------------------------------------------------------------------------------------------------------------------------------------------------------------------------------------------------------------------------------------------------------------------------------------------------------------------------------------------------------------------------------------------------------------------------------------------------------------------------------------------------------------------------------------------------------------------------------------------------------------------------------------------------------------------------------------------------------------------------------------------------------------------------------------------------------------------------------------------------------------------------------------------------------------------------------------------------------------------------------------------------------------------|
| Journal:                      | <i>BMJ Open</i>                                                                                                                                                                                                                                                                                                                                                                                                                                                                                                                                                                                                                                                                                                                                                                                                                                                                                                                                                                                                                                                                                                                                                                                                                                                                                                                                                                                                                                                                                                                                                                                                                                                                                                                                                                                                                                                                                                                                                                                                                                                                                                                              |
| Manuscript ID                 | bmjopen-2023-075187.R1                                                                                                                                                                                                                                                                                                                                                                                                                                                                                                                                                                                                                                                                                                                                                                                                                                                                                                                                                                                                                                                                                                                                                                                                                                                                                                                                                                                                                                                                                                                                                                                                                                                                                                                                                                                                                                                                                                                                                                                                                                                                                                                       |
| Article Type:                 | Protocol                                                                                                                                                                                                                                                                                                                                                                                                                                                                                                                                                                                                                                                                                                                                                                                                                                                                                                                                                                                                                                                                                                                                                                                                                                                                                                                                                                                                                                                                                                                                                                                                                                                                                                                                                                                                                                                                                                                                                                                                                                                                                                                                     |
| Date Submitted by the Author: | 28-Jun-2023                                                                                                                                                                                                                                                                                                                                                                                                                                                                                                                                                                                                                                                                                                                                                                                                                                                                                                                                                                                                                                                                                                                                                                                                                                                                                                                                                                                                                                                                                                                                                                                                                                                                                                                                                                                                                                                                                                                                                                                                                                                                                                                                  |
| Complete List of Authors:     | <p>Loan, James; The University of Edinburgh Centre for Clinical Brain Sciences, Chancellor's Building; Royal Infirmary of Edinburgh, Department of Clinical Neurosciences</p> <p>Bacon, Andrew; Sheffield Teaching Hospitals NHS Foundation Trust van Beijnum, Janneke; University Hospital of Wales, Neurosurgery</p> <p>Bhatt, Pragnesh; Aberdeen Royal Infirmary</p> <p>Bjornson, Anna; Hull Royal Infirmary</p> <p>Broomes, Nicole; University Hospital Southampton NHS Foundation Trust Wessex Neurological Centre</p> <p>Bullen, Alistair; The University of Edinburgh Usher Institute of Population Health Sciences and Informatics, Edinburgh Clinical Trials Unit</p> <p>Bulters, Diederik; University Hospital Southampton NHS Foundation Trust Wessex Neurological Centre</p> <p>Cahill, Julian; Royal Hallamshire Hospital, National Centre for Stereotactic Radiosurgery</p> <p>Chavredakis, Emmanuel; Walton Centre for Neurology and Neurosurgery</p> <p>Colombo, Francesca; Royal Preston Hospital</p> <p>Danicut, Mihai; Hull Royal Infirmary</p> <p>Digpal, Ronneil; University Hospital Southampton NHS Foundation Trust Wessex Neurological Centre</p> <p>Edwards, Richard; Bristol Royal Hospital for Children</p> <p>Ferguson, Lucie; James Cook University Hospital</p> <p>Forsyth, Laura; The University of Edinburgh Usher Institute of Population Health Sciences and Informatics, Edinburgh Clinical Trials Unit</p> <p>Fouyas, Ioannis; Royal Infirmary of Edinburgh, Department of Clinical Neurosciences</p> <p>Ganesan, Vijeya; Great Ormond Street Hospital for Children, Developmental Neurosciences Department</p> <p>Grover, Patrick; University College London Hospitals NHS Foundation Trust</p> <p>Gurusinghe, Nihal; Lancashire Teaching Hospitals NHS Foundation Trust, Department of Neurosurgery</p> <p>Hall, Peter; Institute of Genetics and Cancer, University of Edinburgh</p> <p>Harkness, Kirsty; Royal Hallamshire Hospital</p> <p>Harris, Lauren S; Queen's Hospital</p> <p>Hayton, Tom; Queen Elizabeth Hospital</p> <p>Helmy, Adel; University of Cambridge, Clinical Neurosciences;</p> |

|                                                                                                                                                                |                                                                                                                                                                                                                                                                                                                                                                                                                                                                                                                                                                                                                                                                                                                                                                                                                                                                                                                                                                                                                                                                                                                                                                                                                                                                                                                                                                                                                                                                                                                                                                                                                                                                                                                                                                                                                                                                                                                                                                                                                                                                                                                                                                                                                                                                                                                                                                                                                                                                                                                          |
|----------------------------------------------------------------------------------------------------------------------------------------------------------------|--------------------------------------------------------------------------------------------------------------------------------------------------------------------------------------------------------------------------------------------------------------------------------------------------------------------------------------------------------------------------------------------------------------------------------------------------------------------------------------------------------------------------------------------------------------------------------------------------------------------------------------------------------------------------------------------------------------------------------------------------------------------------------------------------------------------------------------------------------------------------------------------------------------------------------------------------------------------------------------------------------------------------------------------------------------------------------------------------------------------------------------------------------------------------------------------------------------------------------------------------------------------------------------------------------------------------------------------------------------------------------------------------------------------------------------------------------------------------------------------------------------------------------------------------------------------------------------------------------------------------------------------------------------------------------------------------------------------------------------------------------------------------------------------------------------------------------------------------------------------------------------------------------------------------------------------------------------------------------------------------------------------------------------------------------------------------------------------------------------------------------------------------------------------------------------------------------------------------------------------------------------------------------------------------------------------------------------------------------------------------------------------------------------------------------------------------------------------------------------------------------------------------|
|                                                                                                                                                                | <p>Addenbrooke's Hospital,<br/>Holsgrove, Daniel; Salford Royal Hospital Manchester Centre for Clinical Neurosciences<br/>Hutchinson, Peter; University of Cambridge, Academic Neurosurgery;<br/>Addenbrooke's Hospital,<br/>Israni, Anil; Alder Hey Children's Hospital<br/>Kinsella, Elaine; The University of Edinburgh Usher Institute of Population Health Sciences and Informatics, Edinburgh Clinical Trials Unit<br/>Lewis, Steff; The University of Edinburgh Usher Institute of Population Health Sciences and Informatics, Edinburgh Clinical Trials Unit<br/>Majeed, Sohail ; Aberdeen Royal Infirmary, Aberdeen, UK<br/>Mallucci, Conor; Alder Hey Children's Hospital<br/>Mukerji, Nitin; James Cook University Hospital<br/>Nair, Ramesh; Charing Cross Hospital<br/>Neilson, Aileen; The University of Edinburgh Usher Institute of Population Health Sciences and Informatics, Edinburgh Clinical Trials Unit<br/>Papadopoulos, Marios; St George's Hospital, Department of Neurosurgery<br/>Radatz, Matthias; Royal Hallamshire Hospital, National Centre for Stereotactic Radiosurgery<br/>Rosseutsch, Alex; Royal Hallamshire Hospital<br/>Raza-Knight, Saba; Royal Preston Hospital<br/>Stephen, J; The University of Edinburgh Usher Institute of Population Health Sciences and Informatics, Edinburgh Clinical Trials Unit<br/>Stoddart, Andrew; The University of Edinburgh Usher Institute of Population Health Sciences and Informatics, Edinburgh Clinical Trials Unit<br/>Teo, Mario; North Bristol NHS Trust, Department of Neurosurgery<br/>Turner, Carole; University of Cambridge, Clinical Neurosciences;<br/>Addenbrooke's Hospital,<br/>Wade, Julia; University of Bristol, Bristol Medical School<br/>Walsh, Daniel; King's College Hospital; King's College London Institute of Psychiatry Psychology &amp; Neuroscience<br/>White, David; Cavernoma Alliance UK<br/>White, Phil ; Newcastle University Translational and Clinical Research Institute<br/>Wildman, Jack; Southmead Hospital<br/>Wroe Wright, Oliver; King's College Hospital<br/>Uff, Christopher; The Royal London Hospital<br/>Ushewokunze, Shungu; Sheffield Children's Hospital NHS Foundation Trust<br/>Vindlacheruvu, Raghu; Queen's Hospital<br/>Kitchen, Neil; National Hospital for Neurology and Neurosurgery<br/>Al-Shahi Salman, Rustam; The University of Edinburgh Centre for Clinical Brain Sciences, Chancellor's Building; Royal Infirmary of Edinburgh, Department of Clinical Neurosciences</p> |
| <b>Primary Subject Heading</b>:                                                                                                                                | Surgery                                                                                                                                                                                                                                                                                                                                                                                                                                                                                                                                                                                                                                                                                                                                                                                                                                                                                                                                                                                                                                                                                                                                                                                                                                                                                                                                                                                                                                                                                                                                                                                                                                                                                                                                                                                                                                                                                                                                                                                                                                                                                                                                                                                                                                                                                                                                                                                                                                                                                                                  |
| Secondary Subject Heading:                                                                                                                                     | Neurology, Radiology and imaging, Cardiovascular medicine                                                                                                                                                                                                                                                                                                                                                                                                                                                                                                                                                                                                                                                                                                                                                                                                                                                                                                                                                                                                                                                                                                                                                                                                                                                                                                                                                                                                                                                                                                                                                                                                                                                                                                                                                                                                                                                                                                                                                                                                                                                                                                                                                                                                                                                                                                                                                                                                                                                                |
| Keywords:                                                                                                                                                      | Neurosurgery < SURGERY, Stroke < NEUROLOGY, NEUROSURGERY, Paediatric neurology < NEUROLOGY, Adult neurology < NEUROLOGY, Clinical Trial                                                                                                                                                                                                                                                                                                                                                                                                                                                                                                                                                                                                                                                                                                                                                                                                                                                                                                                                                                                                                                                                                                                                                                                                                                                                                                                                                                                                                                                                                                                                                                                                                                                                                                                                                                                                                                                                                                                                                                                                                                                                                                                                                                                                                                                                                                                                                                                  |
| <p>Note: The following files were submitted by the author for peer review, but cannot be converted to PDF. You must view these files (e.g. movies) online.</p> |                                                                                                                                                                                                                                                                                                                                                                                                                                                                                                                                                                                                                                                                                                                                                                                                                                                                                                                                                                                                                                                                                                                                                                                                                                                                                                                                                                                                                                                                                                                                                                                                                                                                                                                                                                                                                                                                                                                                                                                                                                                                                                                                                                                                                                                                                                                                                                                                                                                                                                                          |
| <p>Supplementary material 3 - Patient information leaflets and consent forms.zip</p>                                                                           |                                                                                                                                                                                                                                                                                                                                                                                                                                                                                                                                                                                                                                                                                                                                                                                                                                                                                                                                                                                                                                                                                                                                                                                                                                                                                                                                                                                                                                                                                                                                                                                                                                                                                                                                                                                                                                                                                                                                                                                                                                                                                                                                                                                                                                                                                                                                                                                                                                                                                                                          |

SCHOLARONE™  
Manuscripts

1  
2  
3  
4  
5  
6  
7  
8  
9  
10  
11  
12  
13  
14  
15  
16  
17  
18  
19  
20  
21  
22  
23  
24  
25  
26  
27  
28  
29  
30  
31  
32  
33  
34  
35  
36  
37  
38  
39  
40  
41  
42  
43  
44  
45  
46  
47  
48  
49  
50  
51  
52  
53  
54  
55  
56  
57  
58  
59  
60

**TITLE:**

Cavernomas A Randomised Effectiveness (CARE) pilot trial, to address the effectiveness of active treatment (with neurosurgery or stereotactic radiosurgery) versus conservative management in people with symptomatic brain cavernoma: Study protocol

**Protocol version:**

Published summary of V2.0 (22 March 2021)

**Authors:**

James JM. Loan,<sup>1,2</sup> Andrew Bacon,<sup>3</sup> Janneke van Beijnum,<sup>4</sup> Pragnesh Bhatt,<sup>5</sup> Anna Bjornson,<sup>6</sup> Nicole Broomes,<sup>7</sup> Alistair Bullen,<sup>8</sup> Diederik Bulters,<sup>7</sup> Julian Cahill,<sup>3,22</sup> Emmanuel Chavredakis,<sup>9</sup> Francesca Colombo,<sup>10</sup> Mihai Danciu,<sup>6</sup> Ronneil Digpal,<sup>7</sup> Richard J. Edwards,<sup>11</sup> Lucie Ferguson,<sup>12</sup> Laura Forsyth,<sup>8</sup> Ioannis Fouyas,<sup>2</sup> Vijeya Ganesan,<sup>13</sup> Patrick Grover,<sup>14</sup> Nihal Gurusinghe,<sup>10</sup> Peter S. Hall,<sup>15</sup> Kirsty Harkness,<sup>3</sup> Lauren Harris,<sup>16</sup> Tom Hayton,<sup>17</sup> Adel Helmy,<sup>18,19</sup> Daniel Holsgrove,<sup>20</sup> Peter Hutchinson,<sup>18,19</sup> Anil Israni,<sup>21</sup> Elaine Kinsella,<sup>8</sup> Steff Lewis,<sup>8</sup> Sohail Majeed,<sup>5</sup> Conor Mallucci,<sup>21</sup> Nitin Mukerji,<sup>12</sup> Ramesh Nair,<sup>22</sup> Aileen Rae Neilson,<sup>8</sup> Marios C. Papadopoulos,<sup>23</sup> Matthias Radatz,<sup>24</sup> Alex Rossedeutsch,<sup>3</sup> Saba Raza-Knight,<sup>10</sup> Jacqueline Stephen,<sup>8</sup> Andy Stoddart,<sup>8</sup> Mario Teo,<sup>25</sup> Carole Turner,<sup>18,19</sup> Julia Wade,<sup>26</sup> Daniel Walsh,<sup>27,28</sup> David White,<sup>29</sup> Phil White,<sup>30</sup> Jack Wildman,<sup>25</sup> Oliver Wroe Wright,<sup>27</sup> Christopher Uff,<sup>31</sup> Shungu Ushewokunze,<sup>32</sup> Raghu Vindlacheruvu,<sup>16</sup> Neil Kitchen,<sup>14</sup> Rustam Al-Shahi Salman.<sup>1,2</sup> On behalf of the Cavernomas A randomised Effectiveness (CARE) pilot trial collaborators<sup>†</sup>

<sup>†</sup>Listed at end of manuscript

\*Authors contributed equally

**Keywords:**

Cavernous Malformation, Cavernoma, Randomised controlled trial, Neurosurgery, Stereotactic radiosurgery, Protocol

**Registration:** ISRCTN registration number 41647111

**Correspondence to:**

Professor Rustam Al-Shahi Salman

Centre for Clinical Brain Sciences, University of Edinburgh, Chancellor's Building, 49 Little France Crescent, Edinburgh BioQuarter, Edinburgh, EH16 4SB, UK. [Rustam.Al-Shahi@ed.ac.uk](mailto:Rustam.Al-Shahi@ed.ac.uk)

**Trial sponsor:**



1  
2  
3 35 Academic and Clinical Central Office for Research and Development (ACCORD) Edinburgh  
4 36 Research & Development Management Suite, The Queen's Medical Research Institute, 47  
5 37 Little France Crescent, Edinburgh, EH16 4TJ, UK. enquiries@accord.scot  
6  
7  
8 38

9 39 **Affiliations**

- 10  
11 40 1. Centre for Clinical Brain Sciences, University of Edinburgh, Edinburgh, UK  
12  
13 41 2. Department of Clinical Neurosciences, NHS Lothian, Edinburgh, UK.  
14 42 3. Royal Hallamshire Hospital, Sheffield, UK  
15 43 4. University Hospital of Wales, Cardiff, UK  
16 44 5. Aberdeen Royal Infirmary, Aberdeen, UK  
17 45 6. Hull Royal Infirmary, Hull, UK  
18 46 7. Wessex Neurological Centre, Southampton, UK  
19 47 8. Edinburgh Clinical Trials Unit, Usher Institute, University of Edinburgh, Edinburgh, UK  
20 48 9. The Walton Centre, Liverpool, UK  
21 49 10. Royal Preston Hospital, Preston, UK  
22 50 11. Bristol Royal Hospital for Children, Bristol, UK  
23 51 12. James Cook University Hospital, Middlesbrough  
24 52 13. Developmental Neurosciences Department, Great Ormond Street Institute of Child  
25 53 Health, University College London, London, UK  
26 54 14. The National Hospital for Neurology & Neurosurgery, London, UK  
27 55 15. Institute of Genetics and Cancer, University of Edinburgh, Edinburgh, UK  
28 56 16. Queen's Hospital, Romford, London, UK  
29 57 17. Queen Elizabeth Hospital, Birmingham, UK  
30 58 18. Addenbrookes Hospital, Cambridge, UK  
31 59 19. Department of Clinical Neurosciences, University of Cambridge, Cambridge, UK  
32 60 20. Salford Royal Hospital, Manchester, UK  
33 61 21. Alder Hey Hospital, Liverpool, UK  
34 62 22. Charing Cross Hospital, London, UK  
35 63 23. Department of Neurosurgery, Atkinson Morley Wing, St. George's Hospital, London,  
36 64 UK  
37 65 24. National Centre for Stereotactic Radiosurgery, Royal Hallamshire Hospital, Sheffield,  
38 66 UK  
39 67 25. Southmead Hospital, Bristol, UK  
40 68 26. Population Health Science, Bristol Medical School, University of Bristol, Bristol, UK  
41 69 27. King's College Hospital, London, UK  
42 70 28. Institute of Psychiatry, Psychology and Neuroscience, King's College London, London  
43 71 UK

- 1  
2  
3 72 29. Cavernoma Alliance UK, Watlington, UK  
4 73 30. Translational and Clinical Research Institute, Newcastle University and Newcastle  
5 upon Tyne NHS Foundation Trust, Newcastle upon Tyne, UK  
6 74  
7 75 31. Royal London Hospital, London, UK  
8 76 32. Sheffield Children's Hospital, Sheffield, UK  
9  
10

11 77 **Number of words in abstract:** 266/300

12 78 **Word Count:** 4000/4000

13 79 **Number of references:** 28

14 80 **Number of figures:** 1

15 81 **Number of tables:** 1

16 82 **Number of supplementary files:** 6

17 83

18 84 **CARE COLLABORATORS**

19 85 Royal Infirmary Edinburgh - Ioannis Fouyas, Allan MacRaid, Jessica Teasdale,Michelle  
20 86 Coakley, James Loan, Rustam Al-Shahi Salman, Paul Brennan, Drahoslav Sokol, Anthony  
21 87 Wiggins, Chandru Kaliaperumal, Mairi MacDonald and Sarah Risbridger; St.George's Hospital  
22 88 - Marios Papadopoulos, Siobhan Kearney, Ravindran Visagan, Ellaine Bosetta and Hasan  
23 89 Asif; Great Ormond Street Hospital - Greg James, Aswin Chari, Vijeya Ganesan, Martin  
24 90 Tisdall, Christin Eltze, Zubair Tahir and Sanjay Bhate; National Hospital Neurology and  
25 91 Neurosurgery - Patrick Grover, Azra Banaras, Sifelani Tshuma, Neil Kitchen, William  
26 92 Muirhead, Ciaran Scott Hill, Rupal Shah, Thomas Doke, Rebecca Hall and Sonny Coskuner;  
27 93 Royal Hallamshire Hospital - Andrew Bacon, Kirsty Harkness, Emma Richards, Jo Howe,  
28 94 Christine Kamara, Jonathan Gardner, Madalina Roman, Mary Sikaonga, Matthias Radatz,  
29 95 Julian Cahill, Alex Rossdeutsch, Varduhi Cahill, Imron Hamina, Kishor Chaudhari;  
30 96 Addenbrooke's Hospital - Adel Helmy, Liliana Chapas, Silvia Tarantino, Karen Caldwell,  
31 97 Mathew Guilfoyle, Smriti Agarwal, Daniel Brown, Sarah Holland and Tamara Tajsic; Alder Hey  
32 98 Hospital - Conor Mallucci, Anil Israni, Rachael Dore, Taya Anderson, Dawn Hennigan, Shelley  
33 99 Mayor, Laura O'Malley and Samantha Glover; Aberdeen Royal Infirmary - Pragnesh Bhatt,  
34 100 Janice Irvine, Sohail Majeed, Sandra Williams, John Reid, Annika Walch, Farah Muir and Eng

- 1  
2  
3 101 Tah Goh; Queen Elizabeth Hospital, Birmingham - Tom Hayton, Arlo Whitehouse, Andrew  
4  
5 102 McDarby, Michelle Bates, Rebecca Hancox, Edward White and Claudia Kate Auyeung;  
6  
7 103 Birmingham Children's Hospital - William B Lo and Julie Woodfield; Southmead Hospital -  
8  
9 104 Mario Teo, Jack Wildman, Kerry Smith, Elizabeth Goff, Deanna Stephens, Borislava  
10  
11 105 Borislavova, Ruth Worner, Sandeep Buddha and Philip Clatworthy; Bristol Royal Hospital for  
12  
13 106 Children - Richard Edwards, Karen Coy, Lisa Tucker, Sandra Dymond, Andrew Mallick,  
14  
15 107 Rebecca Hodnett and Francesca Spickett-Jones; University Hospital Wales - Janneke van  
16  
17 108 Beijnum, Paul Leach, Tom Hughes, Milan Makwana, Khalid Hamandi, Dymona McAleer and  
18  
19 109 Belinda Gunning; Hull Royal Infirmary - Mihai Danciu, Emma Clarkson and Anna Bjornson;  
20  
21 110 Walton Centre - Emmanuel Chavredakis, Debbie Brown, Giannis Sokratous, John Williamson,  
22  
23 111 Cathy Stoneley, Andrew Brodbelt, Jibril Osman Farah and Sarah Illingworth; Charing Cross  
24  
25 112 Hospital, London - Ramesh Nair, Sophie Hunter, Niamh Bohnacker, Rosette Marimon, Lydia  
26  
27 113 Parker, Oishik Raha and Puneet Sharma; King's College Hospital, London - Daniel Walsh,  
28  
29 114 Oliver Wroe Wright and Sabina Patel; Salford Royal Hospital - Dan Holsgrove, Danielle  
30  
31 115 McLaughlan, Tracey Marsden, Francesca Colombo, Kathryn Cawley, Hellen Raffalli and Saba  
32  
33 116 Raza-Knight; Manchester Children's Hospital - Ian Kamaly-Asl, Felicia Jennings, Nicola  
34  
35 117 Phillips, Imedla Mayor, James Stewart, Dipek Ram, Rebecca Keeping, Grace Vassallo and  
36  
37 118 Katie Hennessy; James Cook University Hospital - Nitin Mukerji, Emanuel Cirstea, Susan  
38  
39 119 Davies, Venetia Giannakaki, Ammar Kadhim, Oliver Kennion, Md Moidul Islam, Lucie  
40  
41 120 Ferguson and Manjunath Prasad; Royal Victoria Infirmary, Newcastle - Nicholas Ross, Beth  
42  
43 121 Atkinson, Cheryl Webster, Michelle Fawcett, Vicky Slater and Saffnan Mohamed; Royal  
44  
45 122 Preston Hospital - Nihal Gurusinghe, Saba Raza Knight, Terri-Louise Cromie, Allan Brown,  
46  
47 123 Sonia Raj, Ruth Pennington, Charlene Campbell, Shakeelah Patel and Francesca Colombo;  
48  
49 124 Queen's Hospital, Romford - Raghu Vindlacheruvu, Anthony Ghosh, Teresa Fitzpatrick and  
50  
51 125 Lauren Harris; Sheffield Children's Hospital - Shungu Ushewokunze, Sarah Ali, John Preston,  
52  
53 126 Carole Chambers and Mohammed Patel; Southampton General Hospital - Diederik Bulters,  
54  
55 127 Ronneil Diggpal, Winnington Ruiz, Mirriam Taylor, Divina Anyog, Katarzyna Tluchowska,  
56  
57 128 Jackson Nolasco, Daniel Brooks, Kleopatra Angelopoulou, Bethany Welch and Nicole

1  
2  
3  
4  
5  
6  
7  
8  
9  
10  
11  
12  
13  
14  
15  
16  
17  
18  
19  
20  
21  
22  
23  
24  
25  
26  
27  
28  
29  
30  
31  
32  
33  
34  
35  
36  
37  
38  
39  
40  
41  
42  
43  
44  
45  
46  
47  
48  
49  
50  
51  
52  
53  
54  
55  
56  
57  
58  
59  
60

129 Broomes; Royal Stoke Hospital - Howard Brydon, Ida Ponce, Louis Taylor, Lucy Bailey, Mia  
130 Marsden, Claire Hudson, Angelene Cope, Jack Lee, Deepthy Blesson and Rachel Sutton;  
131 Leeds General Infirmary – Ian Anderson, Mary Kambafwile, Linetty Makawa, Jade McAndrew  
132 and Atul Tyagi. Royal London Hospital - Christopher Uff and Geetha Boyapati.

For peer review only

1  
2  
3 **133 ABSTRACT**

4 **134 Introduction:** The top research priority for cavernoma, identified by a James Lind Alliance  
5  
6  
7 **135** Priority setting partnership was “Does treatment (with neurosurgery or stereotactic  
8  
9 **136** radiosurgery) or no treatment improve outcome for people diagnosed with a cavernoma?” This  
10  
11 **137** pilot randomised controlled trial (RCT) aims to determine the feasibility of answering this  
12  
13 **138** question in a main phase RCT.  
14

15 **139**  
16  
17 **140 Methods and analysis:** We will perform a pilot phase, parallel group, pragmatic RCT involving  
18  
19 **141** approximately 60 children or adults with mental capacity, resident in the UK or Ireland, with  
20  
21 **142** an unresected symptomatic brain cavernoma. Participants will be randomised by web-based  
22  
23 **143** randomisation 1:1 to treatment with surgery (neurosurgery or stereotactic radiosurgery) and  
24  
25 **144** medical management versus medical management alone, stratified by pre-randomisation  
26  
27 **145** preference for type of surgery. In addition to 13 feasibility outcomes, the primary clinical  
28  
29 **146** outcome is symptomatic intracranial haemorrhage or new persistent/progressive focal  
30  
31 **147** neurological deficit measured at six monthly intervals. An integrated QuinteT recruitment  
32  
33 **148** intervention (QRI) evaluates screening logs, audio recordings of recruitment discussions, and  
34  
35 **149** interviews with recruiters and patients/parents/carers to identify and address barriers to  
36  
37 **150** participation. A Patient Advisory Group has co-designed the study and will oversee its  
38  
39 **151** progress.  
40  
41  
42  
43  
44

45 **153 Ethics and dissemination:** This study was approved by the Yorkshire and The Humber –  
46  
47 **154** Leeds East Research Ethics Committee (21/YH/0046). We will submit manuscripts to peer  
48  
49 **155** reviewed journals, describing the findings of the QRI and the CARE pilot trial. We will present  
50  
51 **156** at national specialty meetings. We will disseminate a plain English summary of the findings of  
52  
53 **157** the CARE pilot trial to participants and public audiences with input from, and  
54  
55 **158** acknowledgement of, the Patient Advisory Group.  
56

57 **159**  
58  
59 **160 Registration:** ISRCTN registration number 41647111  
60

161

**162 STRENGTHS AND LIMITATIONS OF THIS STUDY**

- 163 • Extensive patient, carer and public involvement in the prioritisation of the study question,  
164 protocol design, study oversight, support for participants, and understanding of barriers to  
165 participation.
- 166 • A QuinteT recruitment intervention (QRI) will identify facilitators and barriers to recruitment  
167 to inform study materials and recommendations for the method of approach by  
168 investigators.
- 169 • Participants and investigators will not be blinded to treatment allocation, so there is a risk  
170 of non-adherence and performance bias, but blinded outcome adjudication will minimise  
171 detection bias.

## 172 INTRODUCTION

173 Symptomatic brain cavernomas are diagnosed in approximately 160 people in the UK annually  
174 and cause intracranial haemorrhage and epilepsy.[1–3] Systematic reviews of treatments for  
175 cavernomas published in 2019 and 2022 identified only observational studies.[4–7] These  
176 demonstrate that both medical and surgical treatments have risks and benefits.[4,5,7,8] No  
177 observational study at low risk of bias demonstrates a strong association between treatment  
178 option and outcome. A randomised controlled trial (RCT) is therefore required to determine  
179 whether treatment with surgery or stereotactic radiosurgery (SRS) improves outcome,  
180 compared with medical management alone, for patients with symptomatic brain cavernoma.[9]  
181 We aim to conduct Cavernomas: A Randomised Evaluation (CARE) pilot trial to address this.  
182 This paper is a published summary of the full protocol (Supplementary material 1).

### 184 Objectives

185 The primary objective is to assess the feasibility of performing a definitive main phase of a  
186 RCT comparing medical management to medical and surgical management (with  
187 neurosurgery or SRS) for improving outcome for people with symptomatic brain cavernoma.  
188 Secondary objectives are: (1) to set up a collaborative network of patient advocacy  
189 organisations and professional representatives at neuroscience centres in the UK and Ireland;  
190 (2) to understand recruitment processes and barriers and optimise informed consent and  
191 recruitment as part of a QuinteT recruitment intervention (QRI); and (3) conduct the CARE  
192 pilot trial for approximately 60 people with symptomatic brain cavernoma.

## 194 METHODS AND ANALYSIS

### 195 Design

196 Two-arm, parallel group randomised feasibility trial with an integrated QRI comparing medical  
197 management to medical and surgical management stratified by preferred type of surgical  
198 management (figure 1).

199

**200 Setting**

201 Participants will be recruited in secondary care settings in the UK and Ireland, from a  
202 collaborative network of research sites. Neurosurgery and follow-up will be conducted by  
203 regional neuroscience centres in the United Kingdom and Ireland. SRS will be performed at  
204 the National Centre for Stereotactic Radiosurgery in Sheffield or the Queen Square  
205 Radiosurgery Centre.

206

**207 Patient and Public Involvement**

208 The research question was developed by a Priority-Setting-Partnership with the patient  
209 advocacy organisation Cavernoma Alliance UK (CAUK).[10] A Patient, carer and public  
210 Advisory Group (PAG) guided and approved study design and scope. CAUK will share study  
211 information and direct patients to Consultant Cavernoma Contacts at CARE pilot trial sites or  
212 to their clinician. Patients will be invited to interviews to explore participation and non-  
213 participation decisions. We will disseminate a plain English summary of the study findings to  
214 participants and public audiences. We will offer to present our project to annual CAUK  
215 meetings.

216

**217 Eligibility**

218 *Inclusion criteria:*

- 219 1. People of any age
- 220 2. At least one brain cavernoma diagnosed by brain MRI that included a gradient echo or  
221 susceptibility-weighted sequence, according to standard diagnostic criteria.[11,12]
- 222 3. Clinical history attributable to a brain cavernoma of:[13,14]
  - 223 a. Symptomatic stroke due to haemorrhage or
  - 224 b. Symptomatic stroke due to a persistent or progressive non-haemorrhagic, or  
225 not otherwise specified, focal neurological deficit, or



1  
2  
3 226 c. Epileptic seizure(s) meeting the definition of definite or probable cavernoma-  
4  
5 227 related epilepsy.  
6

7 228 4. Patient and doctor are uncertain about medical management or medical and surgical  
8  
9 229 management of the symptomatic brain cavernoma, following consultation with a  
10  
11 230 neurosurgeon.  
12

13 231 5. Patient has mental capacity to consent for themselves (adult participants or paediatric  
14  
15 232 participants with capacity) or parent/legal guardian provides consent (paediatric  
16  
17 233 participants).  
18

19  
20 234 There is no time limit on when a patient may be recruited following the presentation and  
21  
22 235 diagnosis of a brain cavernoma. Patients who have previously received surgical management  
23  
24 236 may be included so long as the symptomatic brain cavernoma has not been completely  
25  
26 237 removed/obliterated.  
27

28  
29 238 *Exclusion criteria*  
30

31 239 1. Surgical management of a solitary symptomatic brain cavernoma with MRI evidence  
32  
33 240 of cavernoma removal/obliteration  
34

35 241 2. Spinal cavernoma alone, without symptomatic brain cavernoma  
36

37 242 3. Asymptomatic brain cavernoma. Patients with radiographic cavernoma enlargement  
38  
39 243 (with or without intralesional haemorrhage) but without new symptoms are still  
40  
41 244 regarded as asymptomatic  
42

43  
44 245 4. Previously randomised in the CARE pilot trial  
45

46 246 **Co-enrolment**  
47

48 247 Inclusion in another RCT or observational study does not preclude participation in the CARE  
49  
50 248 pilot trial as long as: participants are not overburdened; their inclusion would be unlikely to  
51  
52 249 confound the CARE pilot trial's results or complicate attribution of serious adverse events and  
53  
54 250 outcomes; the protocol of the other study does not preclude co-enrolment in the CARE pilot  
55  
56 251 trial; and co-enrolment has been agreed with the Chief Investigators of all studies involved in  
57  
58 252 co-enrolment.  
59  
60

253

**254 Interventions**

255 Patients randomised to medical and surgical management will receive neurosurgical excision  
256 or Gamma Knife SRS for their brain cavernoma, in addition to medical management (see  
257 comparator), according to what is available in standard clinical practice in the participant's  
258 health service.

259

**260 *Neurosurgical excision***

261 Surgery will be undertaken by a consultant neurosurgeon who will be responsible for  
262 neurosurgical aspects of clinical care of that patient in CARE. The neurosurgical technique to  
263 resect the cavernoma, including any operative adjuncts, will be that used by that consultant  
264 neurosurgeon in usual clinical practice and tailored to each patient according to the consultant  
265 neurosurgeon's discretion. Post-operative MRI scan performed within 72h of surgery is  
266 recommended, but not mandated, to confirm resection completeness.

267

**268 *Stereotactic radiosurgery***

269 Standard clinical treatment protocols will be used to target the brain cavernoma but not  
270 surrounding haemosiderin. Treatment dosages will range from 12-16Gy depending on the  
271 size, shape, definition and site of the cavernoma. If intracerebral haemorrhage has occurred  
272 from the cavernoma, radiosurgery will be performed once the haematoma is judged to have  
273 been reabsorbed to minimise radiation exposure and treatment volume.

274

**275 Comparator**

276 Medical management constitutes standard medical care for brain cavernoma according to UK  
277 guidelines.[15] This may include anti-epileptic drug therapy, rehabilitation of neurological  
278 deficits, medical treatment of other neurological symptoms, psychological support, and MRI  
279 monitoring, according to clinicians involved in each patient's care.[13]

280

1  
2  
3 281 **Ancillary and post-trial care**  
4

5 282 There are no provisions for ancillary or care for participants after the trial ends. Because  
6  
7 283 interventions in the CARE pilot trial are provided in standard clinical practice, aftercare will  
8  
9 284 occur as standard practice.  
10

11  
12 285

13  
14 286 **QuinteT recruitment intervention**

15  
16 287 *Phase 1*

17  
18 288 Prior to recruitment to study commencement, the QRI researcher qualitatively evaluated  
19  
20 289 factors that may influence recruitment using focus groups comprised of healthcare  
21  
22 290 professionals and PAG members. The QRI researcher observed all CARE pilot trial  
23  
24 291 management group (TMG) and trial steering committee (TSC; Supplementary material 2))  
25  
26 292 meetings during protocol development.  
27

28  
29 293

30 294 During recruitment, the QRI researcher used screening logs, recruitment consultation  
31  
32 295 recordings, interviews with CARE researchers and participants, and observation of trial  
33  
34 296 meetings to investigate recruitment obstacles.  
35

36  
37 297

38  
39 298 *Phase 2*

40  
41 299 In parallel, findings from phase 1 were presented to the Chief Investigator (CI) and TMG and  
42  
43 300 used to implement measures to improve recruitment and information provision.  
44

45  
46 301

47 302 **Outcomes**

48  
49 303 *Primary outcome*

50  
51 304 We will estimate these measures of feasibility:

- 52  
53 305 1. What proportion of the collaborating centres take part and recruit participants to the  
54  
55 306 CARE pilot trial?  
56  
57 307 2. Can the investigators implement trial procedures correctly?  
58  
59 308 3. What proportion of screened patients are eligible?  
60

- 1  
2  
3 309 4. What proportions of eligible patients are approached and randomised (and why are  
4  
5 310 eligible patients not approached or not randomised)?  
6  
7 311 5. What is the distribution of participants between neurosurgery and stereotactic  
8  
9 312 radiosurgery?  
10  
11 313 6. Do participants adhere to the allocated intervention and follow-up?  
12  
13 314 7. How complete are baseline, imaging and outcome data?  
14  
15 315 8. What are the outcome event rates?  
16  
17 316 9. How do the baseline characteristics, outcome event rates and differences between  
18  
19 317 treatment groups compare to observational data about outcomes during medical  
20  
21 318 management or after medical and surgical management?  
22  
23 319 10. What estimates of effect size/variability should be used in the design of the CARE  
24  
25 320 definitive main phase trial?  
26  
27 321 11. What is the sample size required for a definitive trial to address the overall question  
28  
29 322 over a 10-year follow-up?  
30  
31 323 12. Can the CARE pilot trial data describe care pathways, linked to health states and  
32  
33 324 outcomes, to develop a robust economic model to evaluate cost effectiveness in a  
34  
35 325 CARE definitive main phase trial?  
36  
37 326 13. Which international research partners in other countries could contribute to the CARE  
38  
39 327 definitive main phase trial?  
40  
41 328

42  
43  
44  
45 329 *Primary clinical outcome*

46  
47 330 Intracranial haemorrhage or new persistent/progressive focal neurological deficit due to brain  
48  
49 331 cavernoma or surgical management (neurosurgery or stereotactic radiosurgery), whether fatal  
50  
51 332 (leading to death within 30 days of the outcome event) or non-fatal.  
52

53 333

54  
55 334 *Secondary clinical outcomes*

56  
57 335 1. Death not due to a primary clinical outcome  
58  
59  
60

- 336 2. Liverpool Seizure Severity Scale plus epileptic seizure frequency (number of seizures
- 337 in the preceding four weeks, and attainment of one-year seizure freedom)
- 338 3. Modified Rankin Scale (mRS) score
- 339 4. National Institute of Health Stroke Scale Score (NIHSS; adult or paediatric)
- 340 5. EQ-5D-5L in adults and EQ-5D-Y in children
- 341 6. Karnofsky Performance Status (KPS) scale in adults and Lansky Play-Performance
- 342 Scale (LPS) in children

343 We will also collect data to estimate health service use and healthcare and socioeconomic  
344 costs during the entire duration of follow-up.

345

### 346 **Participant timeline**

347 A detailed timeline for data collection is provided in table 1.

348

#### 349 *Identification and screening*

350 The research team will identify eligible patients from the UK and Ireland from multiple sources  
351 including data on admissions, outpatient appointments, referrals, and routine brain imaging.  
352 Diagnoses may be made at any time during or prior to recruitment.

353

#### 354 *Assessment of eligibility*

355 Eligibility will be confirmed following discussion with the patient and a specialist in the type of  
356 treatment that is thought to be most effective for surgical management. Eligibility may be  
357 informed by multidisciplinary discussion.

358

#### 359 *Baseline visit and consent*

360 There is no specific time window for approaching eligible patients for consent. The baseline  
361 visit and consent meeting may be conducted remotely or in person, at the time of

1  
2  
3 362 randomisation or shortly prior to this. The research team will collect a venous blood sample of  
4  
5 363 up to 10mL into an EDTA blood tube for genetic analysis during face-to-face visits.  
6

7 364

8  
9 365 *Surgical treatment*

10  
11 366 It is expected, but not mandated, that surgical management will be delivered within three  
12  
13 367 months of randomisation. Adherence will be assessed remotely by the Trial Coordinating  
14  
15 368 Centre (TCC) at three months.  
16

17 369

18  
19  
20 370 *Qualitative interviews*

21  
22 371 In-depth interviews will be conducted by the QRI researcher in a sample of eligible patients  
23  
24 372 from a variety of sites who have been approached to participate in the trial, with priority given  
25  
26 373 to those declining participation to explore reasons why. Purposive sampling will be used to  
27  
28 374 identify patients. Interviews will take place within three months of the participation decision.  
29

30 375

31  
32 376 *Six-month follow-up visit*

33  
34 377 Participants will be asked to attend for their first six-month follow-up visit in person to perform  
35  
36 378 a brain MRI. Outcome questionnaires will be completed. If not collected at the baseline visit,  
37  
38 379 a blood sample will be obtained.  
39

40 380

41  
42  
43 381 *Six-monthly central follow-up*

44  
45 382 The TCC will subsequently perform six-monthly postal follow-up, including completion of  
46  
47 383 outcome questionnaires, after checking the patient's vital status with their general practitioner.  
48  
49 384 A researcher will contact non-responders electronically.  
50

51 385

52  
53 386 *Long-term follow-up*

54  
55 387 We will ask study participants to consent to long-term follow-up, beyond the planned follow-  
56  
57 388 up in the CARE pilot trial, including the use of routinely collected data in case the CARE pilot  
58  
59 389 proceeds into a definitive main phase trial.  
60

390 **Table 1: Table of assessments.**

| Assessment                                                               | Identification and Screening | Baseline visit | Within 3 months of baseline | 6-month local in-person follow-up | 6-monthly central follow-up |
|--------------------------------------------------------------------------|------------------------------|----------------|-----------------------------|-----------------------------------|-----------------------------|
| Assessment of eligibility                                                | X                            |                |                             |                                   |                             |
| Screening end enrolment logs                                             | X                            |                |                             |                                   |                             |
| Consent to recruitment conversation recordings                           | X <sup>1</sup>               |                |                             |                                   |                             |
| Consent to qualitative interview                                         | X                            |                |                             |                                   |                             |
| Recording of patient recruitment conversations                           | X <sup>2</sup>               | X <sup>2</sup> |                             |                                   |                             |
| Consent to randomisation                                                 | X <sup>3</sup>               | X <sup>3</sup> |                             |                                   |                             |
| Demographic, clinical, socio-economic, medication, and radiographic data |                              | X              |                             |                                   |                             |
| DNA sample                                                               |                              | X              |                             |                                   |                             |
| Provision of diagnostic brain imaging                                    |                              | X              |                             |                                   |                             |
| Questionnaires                                                           |                              | X              |                             | X                                 | X                           |
| Randomisation                                                            |                              | X              |                             |                                   |                             |
| Cavernoma surgical management                                            |                              |                | X                           |                                   |                             |
| Repeat brain MRI                                                         |                              |                |                             | X                                 |                             |
| Outcomes and adverse events                                              |                              |                |                             | X                                 | X                           |
| Qualitative interview                                                    |                              |                | X <sup>4</sup>              |                                   |                             |

- 391  
392 1 – Research teams will be asked to capture verbal consent to audio-recordings of recruitment conversations when the approach is made to the participant. If this is not possible at this time,  
393 consent may be captured during subsequent recruitment conversations.
- 394 2 – Recordings of recruitment conversations with patients should be captured (as requested) wherever the CARE pilot trial is discussed (illustrated here but not restricted to Screening and  
395 Baseline Visit).
- 396 3 – Consent to participation in CARE may be collected at the Baseline Visit or in advance, during the Screening stage.
- 397 4 – Interviews with patients will take place within 3 months of being invited to take part in the trial.

1  
2  
3 398 **Sample size**  
4

5 399 Approximately 240 people will be newly-diagnosed with symptomatic brain cavernoma during  
6  
7 400 18 months of recruitment.[2] We aim for all of these patients to be screened, but if 10% are  
8  
9 401 missed and 10% decline to participate, we expect research teams to identify 190 patients. In  
10  
11 402 the ARUBA trial, 226/726 (31%) of the eligible patients approached were randomised, so we  
12  
13 403 expect at least 60 patients with symptomatic brain cavernoma to be randomised in the CARE  
14  
15 404 pilot trial.[16]  
16  
17

18 405

19  
20 406 **Recruitment and consent**  
21

22 407 Eligible patients will be approached for recruitment during or following discussion with relevant  
23  
24 408 secondary care specialists by research staff who are members of or affiliated to the clinical  
25  
26 409 team and have undergone standardised training on trial-related procedures. An invitation letter  
27  
28 410 may be sent to the patient in advance. Participant information leaflets and informed consent  
29  
30 411 forms will be provided (Supplementary material 3). For children, participant information leaflets  
31  
32 412 are available for children 0-5 years old, 6-10 years old and 11-15 years old. The patient or the  
33  
34 413 parent/guardian will be given as much time as they require to consider the study information  
35  
36 414 and ask questions. Written informed consent may be recorded in paper forms, electronic  
37  
38 415 copies thereof, or an online electronic consent form. Children aged 6-15 who can understand  
39  
40 416 it will be given the option of providing assent.  
41  
42

43 417

44  
45 418 When a child recruited into the trial reaches the age of 16 years (or 18 years old in the Republic  
46  
47 419 of Ireland) and is therefore competent to provide consent, they should be re-consented at their  
48  
49 420 next 6-month follow-up review. No further data will be collected until a signed consent form  
50  
51 421 has been received.  
52

53 422

54  
55 423 *Consent to be contacted for an interview exploring reasons for declining participation*  
56

57 424 Patients or their parents/carers who decline participation in the CARE pilot trial will be invited  
58  
59 425 to consent to participate in an interview with the QRI researcher, exploring their experiences  
60



1  
2  
3 426 of being approached and invited to participate. Where parents/carers consent to take part in  
4  
5 427 an interview, the child/young person may attend and contribute.  
6

7 428  
8

9 429 **Allocation**

10  
11 430 The consensus preference agreed between each patient and their clinician for neurosurgery  
12  
13 431 or SRS, should randomisation allocate them to medical and surgical management, will be  
14  
15 432 recorded at the baseline visit. If there is no clear preference and both are available, the patient  
16  
17 433 will be randomly allocated to the type of surgical treatment they will receive, if allocated to  
18  
19 434 surgical treatment (figure 1). Participants in these two strata will be assigned 1:1 to medical  
20  
21 435 management or medical and surgical management using permuted blocks. Allocation will be  
22  
23 436 concealed until participants are enrolled and assigned using central web-based  
24  
25 437 randomisation. Patients will be informed of their treatment allocation following randomisation.  
26  
27 438

28  
29  
30 439 **Blinding**

31  
32 440 Treatment allocation in the CARE pilot trial is not blinded, and is therefore open to participants,  
33  
34 441 treating clinicians and research staff.  
35  
36 442

37  
38 443 We will aim to keep outcome event assessors blind to treatment allocation. We will measure  
39  
40 444 how often assessors are unblinded to treatment allocation during the process of event  
41  
42 445 adjudication.  
43  
44 446

45  
46  
47 447 **Data collection**

48  
49 448 Demographic socioeconomic data and medical history will be collected at baseline visit  
50  
51 449 alongside the following patient-reported questionnaires: EQ5D-5L (adults), EQ5D-3Y  
52  
53 450 (children), and the Liverpool Seizure Severity Scale. Research staff will assess modified mRS  
54  
55 451 score, NIHSS (adult or paediatric, if examined in person), KPS (adults) and LPS (children).  
56  
57 452 Research teams will upload pseudo-anonymised DICOM images of diagnostic brain imaging  
58  
59 453 for validation by a senior neuroradiologist to confirm or refuse eligibility.  
60

1  
2  
3 454

455 In-depth interviews will be conducted by the qualitative researcher within three months of their  
456 participation decision.

9 457

458 Participants will be asked to attend their six-month follow-up visit in person for brain MRI to  
459 assess cavernoma presence and size, as a measure of treatment efficacy. As a minimum  
460 standard, T1-weighted, T2-weighted, and haem-sensitive gradient recalled echo or  
461 susceptibility-weighted imaging will be required. We will collect any other sequences  
462 performed. Images will be uploaded to the trial database and radiology department of each  
463 site will issue a clinical report. The research team will record clinical outcome events since  
464 randomisation and the details of surgery or SRS. Imaging studies performed because of an  
465 outcome event will be uploaded. The same patient reported questionnaires and standardised  
466 assessments used at baseline will be assessed at the first six-month visit.

30 467

468 After this the TCC will undertake six-monthly postal, telephone or email follow-up.  
469 Questionnaires will ask about disability, health-related quality of life, the occurrence of primary  
470 or secondary clinical outcomes, serious adverse events, the occurrence of surgical  
471 management of the brain cavernoma (described above), and relevant concomitant  
472 medications (anti-epileptic drugs, propranolol, antiplatelet agents, anticoagulant agents, and  
473 statins).

45 474

#### 475 **Retention**

476 We aim for >95% retention of participants at six months with <10% treatment group switches  
477 or loss to follow-up.

53 478

#### 479 **Data management**

480 Personal data will be processed by site research teams, the TCC at the University of  
481 Edinburgh (UoE) and qualitative research staff at the University of Bristol (UoB). Personal data

1  
2  
3 482 will be stored securely at sites and the secure trial database, hosted on a UoE server. Brain  
4  
5 483 imaging will be managed by the Systematic Management, Archiving & Reviewing of Trial  
6  
7 484 Images Service (SMARTIS) at the UoE. Audio-recordings will be securely transferred by  
8  
9 485 qualitative research team members onto a secure drive at the UoB for long-term storage and  
10  
11 486 analysis. Audio-recordings will be labelled with the participant identification number but not  
12  
13 487 identifiable patient details. Audio-recordings will undergo targeted transcription and editing to  
14  
15 488 protect respondents' anonymity. This data will be managed using NVivo software and stored  
16  
17 489 on encrypted UoB drives.  
18  
19  
20  
21

490

## 491 **Data analysis**

### 492 *Statistical analyses*

493 In this pilot phase, analyses are descriptive only, and there will be no formal statistical tests.  
494 A detailed statistical analysis plan is described in Supplementary material 4. We will quantify  
495 the number and proportions (with 95% confidence intervals to reflect their precision) of patients  
496 who are screened, eligible, approached, provide consent and are randomised.[17] We will  
497 construct a CONSORT diagram to summarise the distribution and progress of participants in  
498 the trial including the numbers of withdrawals.[18] We will report descriptively the following:  
499 the number and the proportion of the collaborating sites that take part and recruit participants  
500 to the CARE pilot trial; research teams' implementation of trial procedures measured by  
501 number and type of protocol deviation; the numbers of participants allocated to neurosurgery  
502 and stereotactic radiosurgery; adherence to the allocated intervention; completeness of follow-  
503 up that would be due at each 6-month interval; completeness of baseline, imaging and  
504 outcome data; the frequency of outcome events overall and in an intention-to-treat analysis  
505 keeping patients in the treatment group to which they were allocated during all available follow-  
506 up.

507 We will also compare descriptively the characteristics of eligible patients who are screened  
508 and do not participate in the CARE pilot trial to eligible patients who are randomised using the  
509 characteristics recorded on the screening logs to assess generalisability (external validity) and

1  
2  
3 510 any recruitment bias. We will assess measures of functional outcome, to assess which has  
4  
5 511 suitable statistical properties for use in a main phase trial (such as lack of floor/ceiling effects).  
6  
7 512 We will assess whether such a measure (like the method we have used before[8]) would be  
8  
9 513 more suitable as a primary outcome in place of intracranial haemorrhage.  
10

11 514

12  
13  
14 515 *Quintet Recruitment Intervention data analysis*15  
16 516 The QuinteT researcher will analyse data using the SEAR framework to observe differences  
17  
18 517 between sites in recruitment patterns as new sites open.[17,18] Descriptive analyses will  
19  
20 518 identify where patients are lost to recruitment and the reasons why.  
21

22 519

23  
24 520 Audio recordings of recruitment conversations will be sought from a purposive sample of  
25  
26 521 recruiting sites. The audio recordings will explore information provision, management of  
27  
28 522 patient treatment preferences, and randomisation decisions to identify recruitment difficulties  
29  
30 523 and improve information provision. Analysis will employ content, thematic, and novel analytical  
31  
32 524 approaches, including targeted conversation analysis and quanti-qual appointment  
33  
34 525 timing.[19–22] Interview data will be analysed thematically using constant comparative  
35  
36 526 approaches derived from Grounded Theory methodology.[23]  
3738  
39 52740  
41 528 Findings from the QRI will be fed back to the CI and TMG, to determine a plan of actions to  
42  
43 529 optimise recruitment.  
44

45 530

46  
47 531 *Health economics analysis*48  
49 532 The full health economic analysis plan (HEAP) is in Supplementary material 5.[24,25] We will  
50  
51 533 collect self-reported health service use and social/economic outcomes using bespoke  
52  
53 534 question sets that will inform future economic analyses.[8,26] If data collection is confirmed as  
54  
55 535 feasible, then a previously developed decision model will be updated and further developed  
56  
57 536 to incorporate data collected within this study to provide a putative estimate of cost-  
58  
59 537 effectiveness and its drivers.[27] In the context of the CARE pilot trial, the health economics

1  
2  
3 538 objectives are to: (i) design and test an optimal mechanism for the capture of resource use  
4  
5 539 and cost data in community NHS settings, NHS secondary care, participants' out of pocket  
6  
7 540 expenses and carer costs, (ii) estimate expected effect size and variance of relevant outcomes  
8  
9 541 including health-related utility and quality-adjusted life years, and (iii) identify and measure the  
10  
11 542 potential cost implications of surgical management of cavernomas.  
12

13  
14 543

15  
16 544 We will measure health-related utility, healthcare-related resource use and costs using  
17  
18 545 participant questionnaires before randomisation and at each follow-up timepoint.[20,28] These  
19  
20 546 costs will be ratified by the study team through scrutiny of the patient pathway in both arms of  
21  
22 547 the trials using available medical records to populate CRFs. We will assign unit costs using  
23  
24 548 standard national costing sources where available, or through consultation with relevant  
25  
26 549 service business managers. Costs will be summarised from the perspectives of the NHS and  
27  
28 550 personal social services, and wider society (including participants and their carers).  
29

30  
31 551

## 32 552 **Data Monitoring**

### 33 553 *Data monitoring committee*

34  
35  
36  
37 554 An independent Data Monitoring Committee (DMC) has been established to oversee the  
38  
39 555 safety of participants in the trial (Supplementary material 6). No formal interim analyses are  
40  
41 556 planned during the conduct of the pilot trial.  
42

43 557

### 44 558 *Adverse events*

45  
46  
47 559 Participants will be instructed to contact their local research team if any symptoms develop at  
48  
49 560 any time after being randomised. Participants will be asked about the occurrence of serious  
50  
51 561 adverse events (SAEs) whenever contact is made with them between randomisation and the  
52  
53 562 final central six-monthly follow-up. SAEs may be identified via information from support  
54  
55 563 departments e.g. laboratories. Only events which are clinical outcomes on the trial or are  
56  
57 564 related to medical and surgical management and occur between randomisation and the final  
58  
59 565 6-month follow-up review will be recorded as adverse events (AEs) or SAEs. Only AEs or  
60

1  
2  
3 566 SAEs that are clinical outcomes or SAEs related to medical and surgical management will be  
4  
5 567 recorded in the electronic case report form. If there is any doubt as to whether a clinical  
6  
7 568 observation is an SAE, the event will be recorded.  
8

9 569

10  
11 570 When an SAE occurs, site research staff will review all documentation related to the event,  
12  
13 571 assess whether an AE is an outcome in the trial and record all relevant information. If the AE  
14  
15 572 is detected by central means of follow-up, the TCC will initiate the collection of this information  
16  
17 573 but enlist the help of local site research staff. This information will be reported to the ACCORD  
18  
19 574 (Academic and Clinical Central office for Research and Development) Edinburgh Research  
20  
21 575 Governance & Quality Assurance (QA) Office immediately or within 24 hours. The Investigator  
22  
23 576 will follow-up each event until resolution. All reports sent to ACCORD and any follow-up  
24  
25 577 information will be retained in the Investigator Site File. The sponsor is responsible for  
26  
27 578 reporting SAEs that are “possibly related” to the treatment allocation and “unexpected”, to the  
28  
29 579 REC within 15 days of becoming aware of the event. The TCC will provide SAE line listings  
30  
31 580 from ACCORD for circulation prior to DMC meetings.  
32  
33

34 581

35 582 *Audit*

36  
37 583 Investigators and institutions involved in the study will permit trial related monitoring and audits  
38  
39 584 on behalf of the sponsor, ACCORD, research ethics committee review, and regulatory  
40  
41 585 inspection(s). Risk assessment, if required, will determine if audit by the ACCORD QA group  
42  
43 586 is required. If required, audit details will be captured in an audit plan.  
44  
45

46 587

## 47 588 **ETHICS AND DISSEMINATION**

### 48 589 **Ethical conduct**

49  
50 590 The study will be conducted in accordance with the principles of the International Conference  
51  
52 591 on Harmonisation Tripartite Guideline for Good Clinical Practice (ICH GCP). Prior to study  
53  
54 592 commencement all required approvals were obtained, including that of the Yorkshire and The  
55  
56 593 Humber – Leeds East Research Ethics Committee (REC; 21/YH/0046).  
57  
58  
59  
60

1  
2  
3 5944  
5 **595 Protocol amendments**6  
7 596 Any changes in research activity, except those necessary to remove a hazard to the participant8  
9 597 in the case of an urgent safety measure, must be reviewed and approved by the CI.10  
11 598 Amendments will be submitted to the sponsor for review and authorisation before being12  
13 599 submitted to the appropriate REC and local Research and Development team for approval.14  
15  
16 60017  
18 **601 Data sharing**19  
20 602 Following publication of the primary paper, a de-identified individual participant data set will21  
22 603 be prepared for sharing purposes. All data requests should be submitted to the CI for23  
24 604 consideration. Deidentified data collected during the QRI will be made available by the QuinteT25  
26 605 research group to the CAUK. Other individuals wishing to access deidentified QRI data may27  
28 606 apply to an independent committee.29  
30  
31 60732  
33 **608 Publication and dissemination**34  
35 609 We will submit manuscripts to peer reviewed journals for open access publication. We will36  
37 610 present our findings at meetings of relevant professional associations.38  
39  
40 61141  
42 **612 Insurance and indemnity**43  
44 613 The UoE has insurance in place for negligent harm caused by poor protocol design by45  
46 614 researchers employed by the UoE. Sites participating in the study will be liable for clinical47  
48 615 negligence and other negligent harm to individuals taking part in the study and covered by the49  
50 616 duty of care owed to them by the sites concerned. Sites which are part of the United Kingdom's51  
52 617 National Health Service will have the benefit of NHS Indemnity.53  
54  
55 61856  
57 **619 FUNDING**58  
59  
60

1  
2  
3 620 The CARE pilot trial is funded by the National Institute for Health and Care Research  
4  
5 621 (NIHR128694), which requires publication of the trial protocol but had no other role in  
6  
7 622 manuscript preparation or the decision to publish.  
8  
9  
10 623

## 11 624 **ROLES AND RESPONSIBILITIES**

12  
13 625 Trial co-ordinating centre: Prof Rustam Al-Shahi Salman, Dr Laura Forsyth, Dr Morag  
14  
15 626 Maclean, Katherine Lewis, Dr Jacqueline Stephen, Professor Steff Lewis, Aileen Neilson, Dr  
16  
17 627 Peter Hall, Garry Milne, Eleni Sakka, Chris Linsley, Dr Julia Wade and Debbie Alexander.  
18  
19  
20 628

21  
22 629 Trial Steering Committee: David White, Kathryn Douthwaite, Prof Garth Cruickshank, Mr  
23  
24 630 Richard Kerr, Prof Catherine Hewitt, Prof Haleema Shakur-Still and Mr Neil Kitchen.  
25  
26 631

## 27 632 **AUTHOR STATEMENT**

28  
29  
30 633 Conceptualisation: JJML, AB, LF, VG, PSH, KH, PH, EK, SL, CM, ARN, MR, JS, AS, CT, JW,  
31  
32 634 DW, PW, NK, RASS. Methodology: JJML, AB, LF, VG, PSH, KH, PH, EK, SL, CM, ARN, MR,  
33  
34 635 JS, AS, CT, JW, DW, PW, NK, RASS. Project administration: JJML, AB, JvB, PB, AB, NB,  
35  
36 636 DB, JC, EC, FC, MD, RD, RJE, LF, LF, IF, VG, PG, NG, KH, LH, TH, AH, DH, PH, AI, EK,  
37  
38 637 SM, CM, NM, RN, MCP, MR, AR, SRK, MT, CT, JW, DW, DW, PW, JW, OWW, CU, SU, RV,  
39  
40 638 NK, RASS. Funding Acquisition: LF, EK, NK, RASS. Writing – original draft: JJML. Writing –  
41  
42 639 review and editing: All. Supervision: NK, RASS.  
43  
44  
45 640

## 46 641 **DECLARATION OF CONFLICTING INTERESTS**

47  
48  
49 642 PW declares institutional unrestricted educational grant funding for stroke reperfusion course  
50  
51 643 from Stryker, Penumbra and Medtronic. MR declares that he is a Senior Clinician of the  
52  
53 644 National Centre for Stereotactic Radiosurgery.  
54  
55  
56 645

## 57 646 **ACKNOWLEDGEMENTS**



1  
2  
3 647 We thank all members of the Patient, carer and public Advisory Group for contributing to the  
4  
5 648 development of this study.  
6

7 649

## 9 650 **FIGURE LEGENDS**

10  
11 651 **Figure 1: Participant flow diagram**  
12

13 652

## 15 653 **SUPPLEMENTARY MATERIALS**

- 17  
18 654 1. Full CARE protocol v2.0 (22 March 2021)  
19  
20 655 2. Trial steering committee charter  
21  
22 656 3. Participant information leaflets and consent forms  
23  
24 657 4. Statistical analysis plan  
25  
26 658 5. Health economics analysis plan  
27  
28 659 6. Data monitoring committee charter  
29

30 660

## 32 661 **REFERENCES**

33 662

- 34  
35 663 1 Josephson CB, Leach JP, Duncan R, *et al.* Seizure risk from cavernous or  
36 arteriovenous malformations: prospective population-based study. *Neurology*  
37 2011;**76**:1548–54. doi:10.1212/WNL.0b013e3182190f37  
38 664  
39 665 2 Al-Shahi R, Bhattacharya JJ, Currie DG, *et al.* Prospective, population-based  
40 666 detection of intracranial vascular malformations in adults: the Scottish Intracranial  
41 667 Vascular Malformation Study (SIVMS). *Stroke* 2003;**34**:1163–9.  
42 668 doi:10.1161/01.STR.0000069018.90456.C9  
43 669  
44 670 3 Horne MA, Flemming KD, Su I-C, *et al.* Clinical course of untreated cerebral  
45 671 cavernous malformations: a meta-analysis of individual patient data. *Lancet Neurol*  
46 672 2016;**15**:166–73. doi:10.1016/S1474-4422(15)00303-8  
47 673  
48 674 4 Poorthuis M, Samarasekera N, Kontoh K, *et al.* Comparative studies of the diagnosis  
49 675 and treatment of cerebral cavernous malformations in adults: systematic review. *Acta*  
50 676 *Neurochir (Wien)* 2013;**155**:643–9. doi:10.1007/s00701-013-1621-4  
51 677  
52 678 5 Poorthuis MHF, Rinkel LA, Lammy S, *et al.* Stereotactic radiosurgery for cerebral  
53 679 cavernous malformations: A systematic review. *Neurology* 2019;**93**:e1971–9.  
54 680 doi:10.1212/WNL.00000000000008521  
55  
56  
57  
58  
59  
60

- 1  
2  
3 679 6 Poorthuis MHF, Klijn CJM, Algra A, *et al.* Treatment of cerebral cavernous  
4 680 malformations: a systematic review and meta-regression analysis. *J Neurol*  
5 681 *Neurosurg Psychiatr* 2014;**85**:1319–23. doi:10.1136/jnnp-2013-307349  
6  
7 682 7 Harris L, Poorthuis MHF, Grover P, *et al.* Surgery for cerebral cavernous  
8 683 malformations: a systematic review and meta-analysis. *Neurosurg Rev* 2022;**45**:231–  
9 684 41. doi:10.1007/s10143-021-01591-5  
10  
11 685 8 Moultrie F, Horne MA, Josephson CB, *et al.* Outcome after surgical or conservative  
12 686 management of cerebral cavernous malformations. *Neurology* 2014;**83**:582–9.  
13 687 doi:10.1212/WNL.0000000000000684  
14  
15 688 9 Glasziou P, Chalmers I, Rawlins M, *et al.* When are randomised trials unnecessary?  
16 689 Picking signal from noise. *BMJ* 2007;**334**:349–51. doi:10.1136/bmj.39070.527986.68  
17  
18 690 10 Salman RA-S, Kitchen N, Thomson J, *et al.* Top ten research priorities for brain and  
19 691 spine cavernous malformations. *The Lancet Neurology* 2016;**15**:354–5.  
20 692 doi:10.1016/S1474-4422(16)00039-9  
21  
22 693 11 Akers A, Al-Shahi Salman R, A Awad I, *et al.* Synopsis of guidelines for the clinical  
23 694 management of cerebral cavernous malformations: consensus recommendations  
24 695 based on systematic literature review by the angioma alliance scientific advisory  
25 696 board clinical experts panel. *Neurosurgery* 2017;**80**:665–80.  
26 697 doi:10.1093/neuros/nyx091  
27  
28 698 12 Rigamonti D, Drayer BP, Johnson PC, *et al.* The MRI appearance of cavernous  
29 699 malformations (angiomas). *J Neurosurg* 1987;**67**:518–24.  
30 700 doi:10.3171/jns.1987.67.4.0518  
31  
32 701 13 Rosenow F, Alonso-Vanegas MA, Baumgartner C, *et al.* Cavernoma-related  
33 702 epilepsy: review and recommendations for management--report of the Surgical Task  
34 703 Force of the ILAE Commission on Therapeutic Strategies. *Epilepsia* 2013;**54**:2025–  
35 704 35. doi:10.1111/epi.12402  
36  
37 705 14 Al-Shahi Salman R, Berg MJ, Morrison L, *et al.* Hemorrhage from cavernous  
38 706 malformations of the brain: definition and reporting standards. Angioma Alliance  
39 707 Scientific Advisory Board. *Stroke* 2008;**39**:3222–30.  
40 708 doi:10.1161/STROKEAHA.108.515544  
41  
42 709 15 Samarasekera N, Poorthuis M, Kontoh K, *et al.* Guidelines for the management of  
43 710 cerebral cavernous malformations in adults. Genetic Alliance UK & Cavernoma  
44 711 Alliance UK 2012.  
45  
46 712 16 Mohr JP, Parides MK, Stapf C, *et al.* Medical management with or without  
47 713 interventional therapy for unruptured brain arteriovenous malformations (ARUBA): a  
48 714 multicentre, non-blinded, randomised trial. *Lancet* 2014;**383**:614–21.  
49 715 doi:10.1016/S0140-6736(13)62302-8

- 1  
2  
3 716 17 Wilson C, Rooshenas L, Paramasivan S, *et al.* Development of a framework to  
4 717 improve the process of recruitment to randomised controlled trials (RCTs): the SEAR  
5 718 (Screened, Eligible, Approached, Randomised) framework. *Trials* 2018;**19**:50.  
6 719 doi:10.1186/s13063-017-2413-6  
7  
8 720 18 Eldridge SM, Chan CL, Campbell MJ, *et al.* CONSORT 2010 statement: extension to  
9 721 randomised pilot and feasibility trials. *BMJ* 2016;**355**:i5239. doi:10.1136/bmj.i5239  
10  
11 722 19 Wade J, Donovan JL, Lane JA, *et al.* It's not just what you say, it's also how you say  
12 723 it: opening the "black box" of informed consent appointments in randomised controlled  
13 724 trials. *Soc Sci Med* 2009;**68**:2018–28. doi:10.1016/j.socscimed.2009.02.023  
14  
15 725 20 Herdman M, Gudex C, Lloyd A, *et al.* Development and preliminary testing of the new  
16 726 five-level version of EQ-5D (EQ-5D-5L). *Qual Life Res* 2011;**20**:1727–36.  
17 727 doi:10.1007/s11136-011-9903-x  
18  
19 728 21 Rooshenas L, Paramasivan S, Jepson M, *et al.* Intensive triangulation of qualitative  
20 729 research and quantitative data to improve recruitment to randomized trials: the quintet  
21 730 approach. *Qual Health Res* 2019;**29**:672–9. doi:10.1177/1049732319828693  
22  
23 731 22 Donovan JL, Rooshenas L, Jepson M, *et al.* Optimising recruitment and informed  
24 732 consent in randomised controlled trials: the development and implementation of the  
25 733 Quintet Recruitment Intervention (QRI). *Trials* 2016;**17**:283. doi:10.1186/s13063-016-  
26 734 1391-4  
27  
28 735 23 Strauss A, Corbin J. *Grounded theory methodology. Handbook of qualitative*  
29 736 *research*. Sage Publications Inc 1994.  
30  
31 737 24 Dritsaki M, Gray A, Petrou S, *et al.* Current UK practices on health economics  
32 738 analysis plans (heaps): are we using heaps of them? *Pharmacoeconomics*  
33 739 2018;**36**:253–7. doi:10.1007/s40273-017-0598-x  
34  
35 740 25 Thorn JC, Davies CF, Brookes ST, *et al.* Content of Health Economics Analysis  
36 741 Plans (HEAPs) for Trial-Based Economic Evaluations: Expert Delphi Consensus  
37 742 Survey. *Value Health* 2021;**24**:539–47. doi:10.1016/j.jval.2020.10.002  
38  
39 743 26 Bicalho VC, Bergmann A, Domingues F, *et al.* Cerebral Cavernous Malformations:  
40 744 Patient-Reported Outcome Validates Conservative Management. *Cerebrovasc Dis*  
41 745 2017;**44**:313–9. doi:10.1159/000480125  
42  
43 746 27 Rinkel LA, Al-Shahi Salman R, Rinkel GJ, *et al.* Radiosurgical, neurosurgical, or no  
44 747 intervention for cerebral cavernous malformations: A decision analysis. *Int J Stroke*  
45 748 2019;**14**:939–45. doi:10.1177/1747493019851290  
46  
47 749 28 Royston P, Parmar MKB. Restricted mean survival time: an alternative to the hazard  
48 750 ratio for the design and analysis of randomized trials with a time-to-event outcome.  
49 751 *BMC Med Res Methodol* 2013;**13**:152. doi:10.1186/1471-2288-13-152  
50  
51  
52  
53  
54  
55  
56  
57  
58  
59  
60



**Key:** QRI = evaluated by QuinteT Recruitment Intervention ⊕ = randomised 1:1 allocation

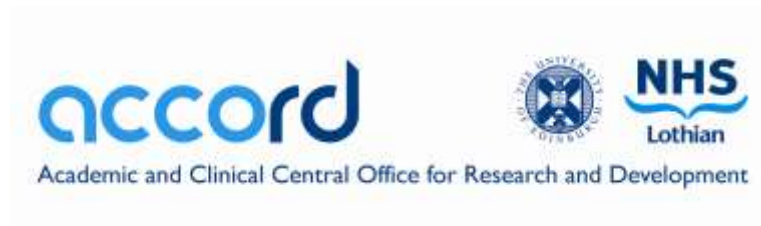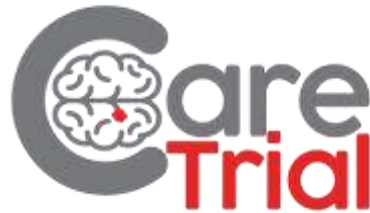

## Study Protocol

**Cavernomas A Randomised Effectiveness (CARE) pilot trial, to address the effectiveness of active treatment (with neurosurgery or stereotactic radiosurgery) versus conservative management in people with symptomatic brain cavernoma**

|                                                                                           |                                                                                                                                                                                                                                                                                                                                                                                        |
|-------------------------------------------------------------------------------------------|----------------------------------------------------------------------------------------------------------------------------------------------------------------------------------------------------------------------------------------------------------------------------------------------------------------------------------------------------------------------------------------|
| Co-sponsors                                                                               | The University of Edinburgh and/or Lothian Health Board<br>ACCORD<br>The Queen's Medical Research Institute<br>47 Little France Crescent<br>Edinburgh<br>EH16 4TJ                                                                                                                                                                                                                      |
| Trial Management Group<br>(listed alphabetically by surname after the chief investigator) | Prof Rustam Al-Shahi Salman (chief investigator)<br>Mr Neil Kitchen (co-chief investigator)<br>Dr Vijeya Ganesan<br>Dr Peter Hall<br>Dr Kirsty Harkness<br>Prof Peter Hutchinson<br>Dr Elaine Kinsella<br>Prof Steff Lewis<br>Mr Jamie Loan<br>Prof Conor Mallucci<br>Mr Matthias Radatz<br>Mr Andy Stoddart<br>Ms Carole Turner<br>Dr Julia Wade<br>Mr David White<br>Prof Phil White |
| Funder                                                                                    | National Institute for Health Research Health Technology Assessment Programme                                                                                                                                                                                                                                                                                                          |
| Funding Reference Number                                                                  | NIHR128694                                                                                                                                                                                                                                                                                                                                                                             |

|                         |                             |
|-------------------------|-----------------------------|
| Chief Investigator      | Prof Rustam Al-Shahi Salman |
| Sponsor number          | AC20171                     |
| REC Number              | 21/YH/0046                  |
| Project registration    | To be confirmed             |
| Version Number and Date | V2.0 (22Mar 2021)           |

For peer review only

# CONTENTS

|    |                                                                               |           |
|----|-------------------------------------------------------------------------------|-----------|
| 1  |                                                                               |           |
| 2  |                                                                               |           |
| 3  |                                                                               |           |
| 4  |                                                                               |           |
| 5  |                                                                               |           |
| 6  |                                                                               |           |
| 7  | <b>SCIENTIFIC ABSTRACT</b> .....                                              | <b>9</b>  |
| 8  | <b>PLAIN ENGLISH SUMMARY</b> .....                                            | <b>10</b> |
| 9  |                                                                               |           |
| 10 | <b>1 INTRODUCTION</b> .....                                                   | <b>11</b> |
| 11 | 1.1 BACKGROUND .....                                                          | 11        |
| 12 | 1.1.1 What are brain cavernomas? .....                                        | 11        |
| 13 | 1.1.2 What treatments are available in standard clinical practice for brain   |           |
| 14 | cavernoma? .....                                                              | 11        |
| 15 | 1.1.3 What evidence supports medical management vs. medical and               |           |
| 16 | surgical management of brain cavernoma?.....                                  | 12        |
| 17 | 1.1.4 Observational studies comparing medical management with medical         |           |
| 18 | and surgical management for brain cavernoma.....                              | 14        |
| 19 | 1.1.5 Summary of procedures, benefits and risks with medical                  |           |
| 20 | management or medical and surgical management for brain                       |           |
| 21 | cavernoma .....                                                               | 15        |
| 22 | 1.2 RATIONALE FOR STUDY .....                                                 | 16        |
| 23 | 1.2.1 The therapeutic dilemma.....                                            | 16        |
| 24 | 1.2.2 Understanding recruitment barriers with a QuinteT recruitment           |           |
| 25 | intervention (QRI).....                                                       | 16        |
| 26 | 1.2.3 This feasibility study and pilot trial will inform the feasibility of a |           |
| 27 | definitive main phase trial.....                                              | 17        |
| 28 | 1.2.4 Patient, carer and public involvement (PCPI) .....                      | 17        |
| 29 |                                                                               |           |
| 30 |                                                                               |           |
| 31 | <b>2 STUDY OBJECTIVES</b> .....                                               | <b>18</b> |
| 32 | 2.1 OBJECTIVES .....                                                          | 18        |
| 33 | 2.1.1 Primary objective .....                                                 | 18        |
| 34 | 2.1.2 Secondary objectives .....                                              | 18        |
| 35 | 2.2 OUTCOMES .....                                                            | 18        |
| 36 | 2.2.1 Primary outcome.....                                                    | 18        |
| 37 | 2.2.2 Primary clinical outcome .....                                          | 19        |
| 38 | 2.2.3 Secondary clinical outcomes.....                                        | 20        |
| 39 | 2.2.4 Feasibility metrics proposed to the funder .....                        | 20        |
| 40 |                                                                               |           |
| 41 | <b>3 STUDY DESIGN</b> .....                                                   | <b>20</b> |
| 42 | 3.1 TRIAL PROFILE .....                                                       | 21        |
| 43 | 3.1.1 QuinteT recruitment intervention .....                                  | 22        |
| 44 |                                                                               |           |
| 45 | <b>4 STUDY POPULATION</b> .....                                               | <b>23</b> |
| 46 | 4.1 NUMBER OF PARTICIPANTS.....                                               | 23        |
| 47 | 4.2 INCLUSION CRITERIA.....                                                   | 23        |
| 48 | 4.3 EXCLUSION CRITERIA.....                                                   | 24        |
| 49 | 4.4 CO-ENROLMENT.....                                                         | 24        |
| 50 |                                                                               |           |
| 51 |                                                                               |           |
| 52 | <b>5 PARTICIPANT SELECTION AND ENROLMENT</b> .....                            | <b>24</b> |
| 53 | 5.1 IDENTIFYING AND SCREENING PARTICIPANTS .....                              | 24        |
| 54 | 5.2 APPROACHING AND CONSENTING PARTICIPANTS.....                              | 25        |
| 55 | 5.2.1 Consent to the QRI .....                                                | 27        |
| 56 | 5.2.2 Consent to participate in the CARE pilot trial.....                     | 27        |
| 57 | 5.2.3 Consent to be contacted for an interview exploring reasons for          |           |
| 58 | declining participation.....                                                  | 29        |
| 59 | 5.3 SCREENING AND ENROLMENT LOGS .....                                        | 29        |
| 60 | 5.4 RANDOMISATION.....                                                        | 30        |

|    |           |                                                                          |
|----|-----------|--------------------------------------------------------------------------|
| 1  |           |                                                                          |
| 2  | 5.4.1     | Randomisation procedures ..... 30                                        |
| 3  | 5.4.2     | Treatment allocation..... 30                                             |
| 4  | 5.4.3     | Blinding (masking)..... 30                                               |
| 5  | 5.5       | WITHDRAWAL OF PARTICIPANTS..... 30                                       |
| 6  | 5.5.1     | Loss of mental capacity in adult participants in England and Wales       |
| 7  |           | ..... 31                                                                 |
| 8  | 5.5.2     | Loss of mental capacity in adult participants in Scotland ..... 31       |
| 9  | 5.5.3     | Loss of mental capacity in adult participants in Northern Ireland ... 31 |
| 10 | 5.5.4     | Loss of mental capacity in adult participants in the Republic of         |
| 11 |           | Ireland..... 32                                                          |
| 12 |           |                                                                          |
| 13 | <b>6</b>  | <b>COMPARATOR ..... 32</b>                                               |
| 14 |           |                                                                          |
| 15 | <b>7</b>  | <b>INTERVENTION..... 32</b>                                              |
| 16 | 7.1       | Neurosurgical excision ..... 33                                          |
| 17 | 7.2       | Stereotactic radiosurgery ..... 33                                       |
| 18 |           |                                                                          |
| 19 | <b>8</b>  | <b>STUDY ASSESSMENTS ..... 33</b>                                        |
| 20 | 8.1       | STUDY ASSESSMENTS ..... 33                                               |
| 21 | 8.1.1     | Table of assessments ..... 34                                            |
| 22 | 8.1.2     | Screening..... 35                                                        |
| 23 | 8.1.3     | Informed consent ..... 35                                                |
| 24 | 8.1.4     | Baseline visit ..... 35                                                  |
| 25 | 8.1.5     | Three-month adherence check..... 36                                      |
| 26 | 8.1.6     | Six-month local follow-up visit ..... 36                                 |
| 27 | 8.1.7     | Six-monthly central follow-up visit ..... 37                             |
| 28 | 8.1.8     | Patient Interviews..... 37                                               |
| 29 |           |                                                                          |
| 30 | 8.2       | LONG TERM FOLLOW UP..... 38                                              |
| 31 | 8.3       | BRAIN MAGNETIC RESONANCE IMAGING ..... 38                                |
| 32 | 8.4       | OUTCOME EVENT ADJUDICATION..... 38                                       |
| 33 | 8.5       | DNA SAMPLE STORAGE AND ANALYSIS ..... 38                                 |
| 34 |           |                                                                          |
| 35 | <b>9</b>  | <b>DATA COLLECTION ..... 39</b>                                          |
| 36 | 9.1       | SOURCE DATA DOCUMENTATION..... 39                                        |
| 37 | 9.2       | CASE REPORT FORMS ..... 39                                               |
| 38 | 9.3       | STUDY DATABASE..... 39                                                   |
| 39 | 9.4       | QRI DATA COLLECTION ..... 39                                             |
| 40 | 9.4.1     | Screening log data ..... 39                                              |
| 41 | 9.4.2     | Recordings of recruitment conversations ..... 39                         |
| 42 | 9.4.3     | Patient and staff interviews ..... 40                                    |
| 43 | 9.4.4     | Meetings ..... 40                                                        |
| 44 | 9.4.5     | Trial documentation..... 40                                              |
| 45 |           |                                                                          |
| 46 | <b>10</b> | <b>DATA MANAGEMENT AND TRANSFER..... 41</b>                              |
| 47 | 10.1      | PERSONAL DATA..... 41                                                    |
| 48 | 10.2      | BRAIN MRI SCANS ..... 41                                                 |
| 49 | 10.3      | QUINTET RECRUITMENT INTERVENTION ..... 41                                |
| 50 | 10.3.1    | Recordings of recruitment conversations ..... 41                         |
| 51 | 10.3.2    | Interviews..... 42                                                       |
| 52 | 10.3.3    | QRI documentation ..... 42                                               |
| 53 | 10.4      | DATA CONTROLLER..... 42                                                  |
| 54 | 10.5      | DATA BREACHES..... 43                                                    |
| 55 |           |                                                                          |
| 56 | <b>11</b> | <b>STATISTICS AND DATA ANALYSIS ..... 43</b>                             |
| 57 | 11.1      | SAMPLE SIZE CALCULATION..... 43                                          |
| 58 | 11.2      | PROPOSED STATISTICAL ANALYSES ..... 43                                   |
| 59 |           |                                                                          |
| 60 |           |                                                                          |



|    |           |                                                                    |
|----|-----------|--------------------------------------------------------------------|
| 1  |           |                                                                    |
| 2  | 11.3      | QUINTET RECRUITMENT INTERVENTION DATA ANALYSIS ..... 44            |
| 3  | 11.3.1    | Screening and enrolment logs..... 44                               |
| 4  | 11.3.2    | Recordings of recruitment conversations and interviews ..... 44    |
| 5  |           |                                                                    |
| 6  | <b>12</b> | <b>HEALTH ECONOMICS AND DATA ANALYSIS..... 44</b>                  |
| 7  | <b>13</b> | <b>ADVERSE EVENTS..... 45</b>                                      |
| 8  | 13.1      | DEFINITIONS ..... 45                                               |
| 9  | 13.2      | IDENTIFYING SAEs ..... 46                                          |
| 10 | 13.3      | RECORDING SAEs ..... 46                                            |
| 11 | 13.3.1    | Pre-existing medical conditions ..... 46                           |
| 12 | 13.3.2    | Worsening of the underlying condition during the trial ..... 46    |
| 13 | 13.4      | ASSESSMENT OF AEs AND SAEs..... 46                                 |
| 14 | 13.4.1    | Assessment of Seriousness ..... 47                                 |
| 15 | 13.4.2    | Assessment of Causality ..... 47                                   |
| 16 | 13.4.3    | Assessment of Expectedness ..... 47                                |
| 17 | 13.4.4    | Assessment of Severity..... 47                                     |
| 18 | 13.5      | REPORTING OF SAEs..... 48                                          |
| 19 |           |                                                                    |
| 20 | <b>14</b> | <b>PREGNANCY..... 48</b>                                           |
| 21 |           |                                                                    |
| 22 | <b>15</b> | <b>OVERSIGHT ARRANGEMENTS ..... 48</b>                             |
| 23 | 15.1      | TRIAL MANAGEMENT GROUP ..... 48                                    |
| 24 | 15.2      | TRIAL STEERING COMMITTEE ..... 48                                  |
| 25 | 15.3      | DATA MONITORING COMMITTEE ..... 49                                 |
| 26 | 15.4      | PATIENT ADVISORY GROUP ..... 49                                    |
| 27 | 15.5      | INSPECTION OF RECORDS ..... 49                                     |
| 28 | 15.6      | STUDY MONITORING AND AUDIT..... 49                                 |
| 29 |           |                                                                    |
| 30 | <b>16</b> | <b>GOOD CLINICAL PRACTICE..... 49</b>                              |
| 31 | 16.1      | ETHICAL CONDUCT ..... 49                                           |
| 32 | 16.2      | INVESTIGATOR RESPONSIBILITIES..... 50                              |
| 33 | 16.2.1    | Informed Consent ..... 50                                          |
| 34 | 16.2.2    | Study Site Staff ..... 50                                          |
| 35 | 16.2.3    | Data Recording ..... 50                                            |
| 36 | 16.2.4    | Investigator Documentation..... 50                                 |
| 37 | 16.2.5    | Training..... 50                                                   |
| 38 | 16.2.6    | Confidentiality ..... 51                                           |
| 39 | 16.2.7    | Data Protection ..... 51                                           |
| 40 |           |                                                                    |
| 41 |           |                                                                    |
| 42 |           |                                                                    |
| 43 |           |                                                                    |
| 44 |           |                                                                    |
| 45 |           |                                                                    |
| 46 |           |                                                                    |
| 47 |           |                                                                    |
| 48 |           |                                                                    |
| 49 |           |                                                                    |
| 50 |           |                                                                    |
| 51 |           |                                                                    |
| 52 |           |                                                                    |
| 53 |           |                                                                    |
| 54 |           |                                                                    |
| 55 |           |                                                                    |
| 56 | <b>17</b> | <b>REPORTING, PUBLICATIONS AND NOTIFICATION OF RESULTS..... 54</b> |
| 57 | 17.1      | AUTHORSHIP POLICY AND REPORTING ..... 54                           |
| 58 | 17.2      | PUBLICATION AND DISSEMINATION..... 54                              |
| 59 | 17.3      | DATA SHARING ..... 54                                              |
| 60 | <b>18</b> | <b>TRIAL TIMELINE ..... 56</b>                                     |

1  
2 **19 PROTOCOL VERSION CONTROL HISTORY ..... 57**  
3 19.1 Version 1.0 (29Jan2021)..... 57  
4 19.2 Version 2.0 (22Mar2021) ..... 57  
5  
6 **20 REFERENCES ..... 58**  
7  
8  
9  
10  
11  
12  
13  
14  
15  
16  
17  
18  
19  
20  
21  
22  
23  
24  
25  
26  
27  
28  
29  
30  
31  
32  
33  
34  
35  
36  
37  
38  
39  
40  
41  
42  
43  
44  
45  
46  
47  
48  
49  
50  
51  
52  
53  
54  
55  
56  
57  
58  
59  
60

For peer review only

## LIST OF ABBREVIATIONS

|                |                                                                                                                                         |
|----------------|-----------------------------------------------------------------------------------------------------------------------------------------|
| <b>95% CI</b>  | 95% confidence interval                                                                                                                 |
| <b>ACCORD</b>  | Academic and Clinical Central Office for Research & Development - Joint office for The University of Edinburgh and Lothian Health Board |
| <b>CARE</b>    | Cavernomas A Randomised Effectiveness trial                                                                                             |
| <b>CAUK</b>    | Cavernoma Alliance UK                                                                                                                   |
| <b>CI</b>      | Chief Investigator                                                                                                                      |
| <b>CRF</b>     | Case Report Form                                                                                                                        |
| <b>DMC</b>     | Data Monitoring Committee                                                                                                               |
| <b>DWI</b>     | Diffusion-Weighted Imaging                                                                                                              |
| <b>eCRF</b>    | Electronic Case Report Form                                                                                                             |
| <b>ECTU</b>    | Edinburgh Clinical Trials Unit                                                                                                          |
| <b>FLAIR</b>   | Fluid Attenuated Inversion Recovery                                                                                                     |
| <b>GCP</b>     | Good Clinical Practice                                                                                                                  |
| <b>ICF</b>     | Informed Consent Form                                                                                                                   |
| <b>ICH GCP</b> | International Conference on Harmonisation for Good Clinical Practice                                                                    |
| <b>MRI</b>     | Magnetic Resonance Imaging                                                                                                              |
| <b>PAG</b>     | Patient, carer and public involvement Advisory Group                                                                                    |
| <b>PI</b>      | Principal Investigator                                                                                                                  |
| <b>PIL</b>     | Patient Information Leaflet                                                                                                             |
| <b>QA</b>      | Quality Assurance                                                                                                                       |
| <b>QRI</b>     | QuinteT Recruitment Intervention                                                                                                        |
| <b>QuinteT</b> | Qualitative Research Integrated within Trials                                                                                           |
| <b>RaDAR</b>   | Rare Disease Ascertainment and Recruitment                                                                                              |
| <b>REC</b>     | Research Ethics Committee                                                                                                               |
| <b>RCT</b>     | Randomised controlled trial                                                                                                             |
| <b>SAIVMs</b>  | Scottish Audit of Intracranial Vascular Malformations                                                                                   |
| <b>SOP</b>     | Standard Operating Procedure                                                                                                            |
| <b>TCC</b>     | Trial Coordinating Centre                                                                                                               |

|            |                          |
|------------|--------------------------|
| <b>TMG</b> | Trial Management Group   |
| <b>TSC</b> | Trial Steering Committee |

For peer review only

1  
2  
3  
4  
5  
6  
7  
8  
9  
10  
11  
12  
13  
14  
15  
16  
17  
18  
19  
20  
21  
22  
23  
24  
25  
26  
27  
28  
29  
30  
31  
32  
33  
34  
35  
36  
37  
38  
39  
40  
41  
42  
43  
44  
45  
46  
47  
48  
49  
50  
51  
52  
53  
54  
55  
56  
57  
58  
59  
60

## SCIENTIFIC ABSTRACT

This is a pilot randomised controlled trial (RCT) to assess the feasibility of conducting a definitive main phase RCT to address the research question commissioned by the NIHR HTA, "How effective is active treatment (with neurosurgery or stereotactic radiosurgery) versus conservative management in people with symptomatic brain cavernoma?" The terms 'conservative management' and 'active treatment' were used in the commission, but throughout this protocol we will refer to 'conservative management' as 'medical management' and 'active treatment' as 'medical and surgical management'. We will assess: collaborator engagement; proportions of screened patients who are eligible, approached, consented, or randomised; barriers to recruitment; RCT procedure implementation; adherence; data completeness; outcome event rates; and generalisability.

At least 160 people with brain cavernomas are newly diagnosed after symptoms due to stroke or epilepsy in the UK each year. A James Lind Alliance Priority Setting Partnership found that the top research priority for cavernoma was, "Does treatment (with neurosurgery or stereotactic radiosurgery) or no treatment improve outcome for people diagnosed with a cavernoma?". A RCT is required to answer this question, but systematic reviews and trial register searches have not revealed any such RCTs.

The Cavernomas A Randomised Effectiveness (CARE) pilot trial aims to:

1. Engage a collaboration of specialists and patient advocacy groups in the UK and Ireland.
2. Establish a pilot RCT, with an embedded qualitative study to understand the anticipated recruitment processes and address any barriers.
3. Assess the feasibility of performing a definitive main phase of the RCT.

The CARE pilot trial will include:

- I. A pilot phase parallel group RCT for patients with symptomatic brain cavernoma, comparing medical management versus medical and surgical management (with neurosurgery or stereotactic radiosurgery), with randomisation stratified by preferred type of surgical management. Collaborators will keep screening logs to capture characteristics of patients screened, eligible, approached, consented and randomised. This prospective randomised open blinded end-point RCT will recruit ~60 participants.
- II. A QuinteT recruitment intervention (QRI) will evaluate screening logs and incorporate qualitative research to understand recruitment processes and barriers and identify actions to address barriers.

We will use (I) and (II) to estimate the feasibility and generalisability of a definitive main phase of the CARE RCT by extending the UK collaboration to other patient support organisations and clinical communities elsewhere in the world.

## PLAIN ENGLISH SUMMARY

A cavernoma is a cluster of blood vessels that form blood-filled 'caverns' in the brain that look like a raspberry. Cavernomas can bleed into the brain and cause a stroke. Cavernomas can also cause a seizure or epilepsy. About 160 people in the UK each year are diagnosed with a cavernoma that has caused symptoms. Stroke and seizure may lead to disability, handicap and occasionally death. In standard practice in the UK, most people with cavernomas have medical management (which may involve scans, drugs, or rehabilitation) to manage these symptoms. About one fifth also have 'surgical management' with either brain surgery to remove a cavernoma or stereotactic radiosurgery to stabilise it with radiation. Surgical management can cause death, disability, and handicap.

The pros and cons of medical management versus medical and surgical management are finely balanced. The most reliable way of finding out which management is best is to do a randomised trial, in which suitable patients are allocated to medical management or medical and surgical management at random. This has never been done with cavernomas, and this was the top priority identified by a Priority Setting Partnership for cavernoma.

The NIHR wants research to be done to find out whether enough patients can be found for a randomised trial comparing 'medical management with 'medical and surgical management' of symptomatic cavernomas. We need to know this because cavernomas are rare and we do not know whether patients and doctors will take part. In three years, we will:

- (1) Create a network of specialists to do this study. We will include the UK and Ireland patient support organisations for people with cavernoma (Cavernoma Alliance UK - CAUK) and doctors representing the relevant specialties at all the major hospitals specialising in decisions about cavernoma treatment in the UK and Ireland.
- (2) Invite newly diagnosed patients to join a pilot phase of a randomised controlled trial. Of 190 people diagnosed with brain cavernoma in 18 months, we estimate that 60 of them will enrol in the randomised trial. We will study why some patients take part in the randomised trial and others don't. We will use this information to change the methods of the trial if recruitment to the randomised trial goes slowly.
- (3) Estimate whether enough patients can be found for a full-scale randomised trial to be done to find out whether medical management or medical and surgical management of symptomatic brain cavernomas is best.

We involved people with cavernoma, carers, and representatives of CAUK with patients and carers on 6 July 2019: all approved the design of the project and the extent of patient and public involvement. The focus group wanted the trials to be as inclusive of patients as possible. The focus group recognised how the project would benefit from them contributing their 'lived experience' of brain cavernoma.

People with cavernoma, carers, and representatives of CAUK will also keep an eye on the research by forming an advisory group and meeting regularly to discuss the research. Two representatives of this group will join and advise the steering committee.

We will publish our findings in medical journals. We will work with CAUK to produce a plain English summary and circulate it to patients via newsletters, email, the web, and social media.

# 1 INTRODUCTION

## 1.1 BACKGROUND

### 1.1.1 What are brain cavernomas?

Cerebral cavernous malformations or 'cavernomas' are intracranial vascular malformations that are diagnosed using histopathological examination or magnetic resonance imaging (MRI). Although most cavernomas are solitary and sporadic, around one-fifth are multiple with autosomal dominant inheritance due to mutations in three genes (1), so there are implications for relatives as well.

Large brain MRI cohorts have shown that the asymptomatic prevalence of brain cavernomas is 0.16%, currently affecting ~106,000 people in the UK (2). Some of these people present to medical attention with symptoms such as epileptic seizures or stroke due to either intracranial haemorrhage or 'focal neurological deficits' anatomically related to the cavernoma that do not appear to be due to haemorrhage (3). The incidence of symptomatic cavernoma in the UK was 0.24 per 100,000 per year at the turn of the millennium (4), so approximately 160 people are newly-diagnosed with symptomatic cavernoma in the UK annually. The impact of cavernoma is disproportionately high in comparison to their frequency, because they are usually diagnosed in children and young adults of working age (4).

People with cavernoma face a considerable risk of recurrent stroke due to intracranial haemorrhage, which is reliably known over five years after diagnosis (5), but is likely to continue for their lifetime. The 5-year risk of intracranial haemorrhage ranges from ~3.8% for people with non-brainstem cavernoma who have presented without a stroke to ~30.8% for people with brainstem cavernoma who have presented with stroke due to intracranial haemorrhage or focal neurological deficit.

People with cavernoma who present with an epileptic seizure almost inevitably develop epilepsy within one year, and only half of people with cavernoma-related epilepsy achieve two-year seizure-freedom (6).

These persistent symptoms also cause economic consequences for people with cavernoma, carers, the NHS, social services, and lost productivity in the UK workforce (7).

### 1.1.2 What treatments are available in standard clinical practice for brain cavernoma?

'Medical management' constitutes standard medical care alone (e.g. prevention of epileptic seizures with anti-epileptic drugs, and rehabilitation of neurological deficits, according to UK guidelines (8)). This is the most frequently used management plan for people with brain cavernoma in the UK (9).

Surgical management of brain cavernoma with neurosurgical excision or stereotactic radiosurgery is used in standard clinical practice for some patients to try to prevent recurrent epileptic seizures and stroke due to intracranial haemorrhage or non-haemorrhagic focal neurological deficit, which can result in death, disability,

1  
2 handicap, and psychological consequences for patients and carers (10). Surgical  
3 management is given in addition to medical management in standard clinical  
4 practice, as described above, so throughout this protocol we will refer to this as  
5 'medical and surgical management' for clarity.  
6

7 Medical and surgical management in the CARE pilot trial involves health  
8 technologies that are available in standard clinical practice in the UK and Republic of  
9 Ireland; these are either neurosurgical excision (performed by neurosurgeons at 37  
10 regional adult or paediatric neuroscience centres) or stereotactic radiosurgery (using  
11 Gamma Knife performed at the National Centre for Stereotactic Radiosurgery in  
12 Sheffield or the Queen Square Radiosurgery Centre). Neurosurgical excision is the  
13 most frequently-used form of surgical treatment for brain cavernoma in the UK, but it  
14 involves a craniotomy and the risk of complications is much higher for some  
15 cavernomas deep within the brain or brainstem that cannot be accessed without  
16 traversing brain tissue with important functions. Stereotactic radiosurgery (using  
17 Gamma Knife) is non-invasive and may be used because neurosurgery is too risky or  
18 a patient wants a non-invasive treatment. There are some emerging technologies for  
19 the surgical treatment of brain cavernomas, including minimally invasive therapeutic  
20 approaches for brain cavernoma such as magnetic resonance thermography-guided  
21 laser interstitial thermal therapy, or stereotactic laser ablation (11). Although medical  
22 and surgical management in the CARE pilot trial will continue to be neurosurgical  
23 excision or Gamma Knife stereotactic radiosurgery plus medical management, we  
24 will collect details of each type of surgical treatment used after randomisation to allow  
25 us to quantify the use of emerging technologies.  
26  
27

28 Medical and surgical management can have complications that can be fatal or  
29 disabling (9; 12; 13), and there are few reliable data about the benefits and risks of  
30 medical management versus medical and surgical management (8; 14; 15), so most  
31 patients have medical management (9).  
32

33 Although drugs like propranolol, antiplatelet agents, anticoagulant agents and statins  
34 are not licensed for the treatment of brain cavernoma, some clinicians may use them  
35 off-label for patients who are unsuitable for medical and surgical management  
36 because these drugs may have disease-modifying effects (16).  
37  
38

### 39 **1.1.3 What evidence supports medical management vs. medical and surgical** 40 **management of brain cavernoma?** 41

42  
43 A search of ClinicalTrials.gov trial register on 17 November 2020 using the terms,  
44 "cavernoma OR cavernous angioma OR cavernous malformation" revealed five  
45 RCTs of drug therapies for brain cavernoma, but no completed, ongoing, or planned  
46 RCTs comparing medical management with medical and surgical management.  
47

48 In several systematic reviews of observational cohort studies comparing medical  
49 management to medical and surgical management of brain cavernoma, or one form  
50 of surgical management to another, there were no studies at low risk of bias that  
51 demonstrated sufficiently "dramatic" associations between medical management  
52 versus medical and surgical management of brain cavernoma and clinical outcomes  
53 that would make a RCT unnecessary (14; 17).  
54

55 We performed or updated (to 2018-2019) several systematic reviews and meta-  
56 analyses including:  
57

- 58 i. observational cohort studies that compared medical and surgical  
59 management involving stereotactic radiosurgery or neurosurgery against  
60 medical management in a concurrent or historical control group and reported  
clinical outcome (14; 18)



- ii. observational cohort studies without comparison groups reporting clinical outcomes after either medical management (5), neurosurgery (9; 19), or stereotactic radiosurgery (18; 19); and
- iii. decision analysis comparing all management strategies using a Markov model with a time horizon of five years (20)

The best available evidence from observational studies comparing medical management with medical and surgical management is summarised in a table (see 1.1.4 below) and in more detail in the following paragraphs.

#### 1.1.3.1 Neurosurgery versus medical management

There are seven observational cohort studies that compare neurosurgery and medical management (9; 21; 22; 23; 24; 25; 26). The best available comparative data on an entire incident brain cavernoma population found neurosurgery to be associated with harm over five years (hazard ratios 2.2-3.6) (9)), although other comparative studies restricted to brainstem/deep cavernomas have suggested both harm (risk ratios 1.9-7.8) and benefit (risk ratios 0.5-0.6) on the risk of intracranial haemorrhage over 4-6 years (21; 22; 23; 24), but the long-term difference in risk is unknown and might favour neurosurgery.

#### 1.1.3.2 Stereotactic radiosurgery versus medical management

In the only observational cohort study comparing stereotactic radiosurgery with medical management at one hospital in Korea (27) (see table below), stereotactic radiosurgery might have been harmful, but the risk ratio was incalculable because of the paucity of outcomes. Indirect comparisons imply that stereotactic radiosurgery might be superior to medical management over five years. In a systematic review and meta-analysis of 30 cohort studies of patients undergoing stereotactic radiosurgery for brain cavernoma (median 61% of whom had brainstem cavernoma and median 91% of whom had presented with intracranial haemorrhage), during a median follow-up of 48 (IQR 35-62) months after stereotactic radiosurgery, the annual incidence of the composite of death, intracranial haemorrhage or focal neurological deficit was 3.6% (95% CI 3.17-4.16) (18). Using these data to estimate the five-year risk (16.9%) after stereotactic radiosurgery and comparing the risk indirectly to the cumulative 5-year risks of intracranial haemorrhage with medical management that range from ~18% to ~31% for comparable patient groups (5), suggests that stereotactic radiosurgery might be superior to medical management over five years. A systematic review of stereotactic radiosurgery restricted to brainstem cavernoma suggested that treatment was beneficial by comparing intracranial haemorrhage risks before and after treatment (13), but their findings are unreliable because they may simply reflect the untreated clinical course of brain cavernoma in which intracranial haemorrhage risk declines over time (5).

Our summary of the procedures, benefits and risks for patients and carers is also summarised in a table (see 1.1.5 below).

#### 1.1.4 Observational studies comparing medical management with medical and surgical management for brain cavernoma.

| Study                                                   | Population                                                        | Intervention                                 | Comparator                 | Outcomes / Time                                                                                         | Medical vs. medical and surgical management absolute &/or relative risk(s) of ICH                                                         |
|---------------------------------------------------------|-------------------------------------------------------------------|----------------------------------------------|----------------------------|---------------------------------------------------------------------------------------------------------|-------------------------------------------------------------------------------------------------------------------------------------------|
| <b>Neurosurgery vs. medical management</b>              |                                                                   |                                              |                            |                                                                                                         |                                                                                                                                           |
| <i>Brain cavernomas in any location</i>                 |                                                                   |                                              |                            |                                                                                                         |                                                                                                                                           |
| Moultrie <i>et al.</i> 2014 (9)                         | 134 adults (40 had caused ICH/FND)                                | Surgery (n=25)                               | Medical management (n=109) | Functional outcome (at least 2 successive ratings of >1 on the mRS), or new ICH/FND during 5y follow-up | Functional outcome: 13/25 vs. 40/109<br><b>(aHR 2.2, 95% CI 1.1–4.3)</b><br>ICH/FND: 8/25 vs. 17/109<br><b>(aHR 3.6, 95% CI 1.3–10.0)</b> |
| Kida <i>et al.</i> 2015 (25)                            | 78 adults (53 had caused ICH)                                     | Surgery (n=29)                               | Medical management (n=49)  | ICH during 3.8-4.6y follow-up                                                                           | 2/29 vs. 16/49<br><b>(RR 0.6, 95% CI 0.1–2.6)</b>                                                                                         |
| <i>Brainstem/deep cavernomas</i>                        |                                                                   |                                              |                            |                                                                                                         |                                                                                                                                           |
| Esposito <i>et al.</i> 2003 (20)                        | 30 adults (26 had caused ICH/FND)                                 | Surgery (n=13)                               | Medical management (n=17)  | ICH/FND over average 3.9y                                                                               | 6/13 vs. 1/17<br><b>(RR 7.8, 95% CI 1.1–57.4)</b>                                                                                         |
| Mathiesen <i>et al.</i> 2003 (21)                       | 68 adults (48 had caused ICH/FND)                                 | Surgery (n=29)                               | Medical management (n=34)  | ICH over average 4.6y                                                                                   | 4/29 vs. 8/34<br><b>(RR 0.6, 95% CI 0.2–1.7)</b>                                                                                          |
| Tarnaris <i>et al.</i> 2008 (22)                        | 21 adults (17 had caused ICH/FND)                                 | Surgery (n=6)                                | Medical management (n=15)  | ICH over average 6.5y                                                                                   | 3/6 vs. 4/15<br><b>(RR 1.9, 95% CI 0.6–6.0)</b>                                                                                           |
| Huang <i>et al.</i> 2010 (23)                           | 30 adults (30 had caused ICH/FND)                                 | Surgery (n=22)                               | Medical management (n=8)   | “Deterioration” over average 4y                                                                         | 3/22 vs. 2/8<br><b>(RR 0.5, 95% CI 0.1–2.7)</b>                                                                                           |
| <i>Brain cavernomas not in brainstem/deep locations</i> |                                                                   |                                              |                            |                                                                                                         |                                                                                                                                           |
| Kivelev <i>et al.</i> 2009 (24)                         | 33 adults (15 had caused ICH)                                     | Surgery (n=18)                               | Medical management (n=15)  | ICH over average 7.7y                                                                                   | 0/18 vs. 4/15<br>(RR incalculable)                                                                                                        |
| <b>Stereotactic radiosurgery vs. medical management</b> |                                                                   |                                              |                            |                                                                                                         |                                                                                                                                           |
| Yoon <i>et al.</i> 1998 (26)                            | 41 adults with cavernomas in any location (20 had caused ICH/FND) | Gamma Knife stereotactic radiosurgery (n=22) | Medical management (n=19)  | ICH, adverse radiation effects (ARE) over 2-3.5y                                                        | ICH: 2/22 vs. 0/19<br>(RR incalculable)<br>ARE 5/22 vs. 0/19<br>(RR incalculable)                                                         |

aHR = adjusted hazard ratio; ARE = adverse radiation effects; FND = focal neurological deficit; ICH = intracranial haemorrhage; mRS = modified Rankin Scale; RR = risk ratio (estimated from aggregate data).

### 1.1.5 Summary of procedures, benefits and risks with medical management or medical and surgical management for brain cavernoma

|                                        | Medical management                                                                                                                                                                                                                                                                                                                                                                                                                                                            | Medical and surgical management                                                                                                                                                                                                                                                                                                                                                                                                                |                                                                                                                                                                                                                                                                                                                                                                                                                                  |
|----------------------------------------|-------------------------------------------------------------------------------------------------------------------------------------------------------------------------------------------------------------------------------------------------------------------------------------------------------------------------------------------------------------------------------------------------------------------------------------------------------------------------------|------------------------------------------------------------------------------------------------------------------------------------------------------------------------------------------------------------------------------------------------------------------------------------------------------------------------------------------------------------------------------------------------------------------------------------------------|----------------------------------------------------------------------------------------------------------------------------------------------------------------------------------------------------------------------------------------------------------------------------------------------------------------------------------------------------------------------------------------------------------------------------------|
|                                        |                                                                                                                                                                                                                                                                                                                                                                                                                                                                               | Neurosurgery                                                                                                                                                                                                                                                                                                                                                                                                                                   | Stereotactic radiosurgery                                                                                                                                                                                                                                                                                                                                                                                                        |
| <b>What may be involved?</b>           | <ul style="list-style-type: none"> <li>• Treat symptoms</li> <li>• Prevent seizures</li> <li>• Rehabilitation</li> <li>• Brain scan</li> </ul>                                                                                                                                                                                                                                                                                                                                | <ul style="list-style-type: none"> <li>• Treat symptoms</li> <li>• Prevent seizures</li> <li>• Rehabilitation</li> <li>• Brain scan</li> </ul>                                                                                                                                                                                                                                                                                                 | <ul style="list-style-type: none"> <li>• Treat symptoms</li> <li>• Prevent seizures</li> <li>• Rehabilitation</li> <li>• Brain scan</li> </ul>                                                                                                                                                                                                                                                                                   |
| <b>What are the possible benefits?</b> | <ul style="list-style-type: none"> <li>• Bleed/stroke risk reduces as time passes</li> <li>• Avoids risks of neurosurgery or radiosurgery</li> </ul>                                                                                                                                                                                                                                                                                                                          | <ul style="list-style-type: none"> <li>• Risk of bleed/stroke lower if cavernoma removed</li> <li>• Less worry about symptoms returning</li> </ul>                                                                                                                                                                                                                                                                                             | <ul style="list-style-type: none"> <li>• Risk of bleed/stroke may be lower if cavernoma stabilised, but these benefits are uncertain</li> <li>• Less worry about symptoms returning</li> </ul>                                                                                                                                                                                                                                   |
| <b>What are the possible risks?</b>    | <ul style="list-style-type: none"> <li>• Future bleed/stroke due to cavernoma <ul style="list-style-type: none"> <li>○ Can be mild</li> <li>○ May be disabling</li> <li>○ Rarely be fatal</li> <li>○ Risk higher for cavernoma in brainstem</li> </ul> </li> <li>• Epileptic seizures, which may be difficult to control</li> <li>• Cavernoma remains in the brain, so the risks of stroke and seizure may never go away</li> <li>• Worry about symptoms returning</li> </ul> | <ul style="list-style-type: none"> <li>• Bleed/stroke due to neurosurgery <ul style="list-style-type: none"> <li>○ Can be mild</li> <li>○ May be disabling</li> <li>○ Rarely be fatal</li> <li>○ Risk higher for cavernoma in brainstem</li> </ul> </li> <li>• Epileptic seizures may not go away</li> <li>• Complications of treatment (e.g. infection or damage to brain around the cavernoma)</li> <li>• Cavernoma may come back</li> </ul> | <ul style="list-style-type: none"> <li>• Bleed/stroke despite radiosurgery <ul style="list-style-type: none"> <li>○ Can be mild</li> <li>○ May be disabling</li> <li>○ Rarely be fatal</li> <li>○ Risk higher for cavernoma in brainstem</li> </ul> </li> <li>• Epileptic seizures may not go away</li> <li>• Complications of treatment (e.g. damage to brain around the cavernoma)</li> <li>• Cavernoma not removed</li> </ul> |

## 1.2 RATIONALE FOR STUDY

### 1.2.1 The therapeutic dilemma

The shortage of high-quality evidence to inform the management of patients with brain cavernomas has prevented clinical guidelines in the UK and USA from making strong recommendations about whether to use medical management or medical and surgical management for brain cavernomas (8; 15). These uncertainties were confirmed by patients and carers in a James Lind Alliance Priority Setting Partnership in the UK, which found that the top research priority for cavernoma was, “Does treatment (with neurosurgery or stereotactic radiosurgery) or no treatment improve outcome for people diagnosed with brain or spine cavernoma?” (28).

Therefore, in 2018 the NIHR HTA commissioned research to address the question, “How effective is treatment (with neurosurgery or stereotactic radiosurgery) versus conservative management in people with symptomatic brain cavernoma?” The NIHR’s commissioning brief reported that feedback from experts suggested that a randomised controlled trial (RCT) with at least 10 years of follow-up would be needed to better guide clinical care and that it would be necessary to conduct a multinational trial in countries with similar healthcare settings to the UK to ensure sufficient numbers for a robust trial.

### 1.2.2 Understanding recruitment barriers with a QuinteT recruitment intervention (QRI)

Resolving this therapeutic dilemma is likely to be challenging because of the low incidence of symptomatic brain cavernoma despite a high prevalence, because the availability of surgical management varies in everyday clinical practice (8; 15), and because accumulated expertise in specialist centres has guided clinical practice hitherto despite the lack of high quality evidence (29). Recruitment to the CARE pilot trial is likely to remain challenging given the history of RCTs comparing medical management versus medical and surgical management of intracranial vascular malformations with invasive procedures (30; 31). The reasons for poor recruitment to such trials have not been studied, so qualitative research is needed to investigate the potential barriers to recruitment and optimise recruitment processes in the CARE pilot trial. Many RCTs experience recruitment challenges due to difficulties that recruiters have in explaining concepts like uncertainty, equipoise and randomisation (32). Discussions with members of our collaboration during the development of this proposal have raised concerns about clinical equipoise amongst neurosurgeons, partly due to treatment preferences according to the anatomical location of the brain cavernoma, concerns about exposing children to radiation, scepticism about the effects of stereotactic radiosurgery, and the availability of stereotactic radiosurgery in the NHS for brain cavernoma at only two sites in the UK (although patients may be referred from any hospital) (29). Also, patients may have treatment preferences (e.g. for less invasive procedures), and patient/family preferences may affect RCTs involving children in particular (33).

An integrated QRI aims to understand recruitment barriers (e.g. related to selection of patients during screening and recruitment processes, or equipoise, etc.) and optimise informed consent and recruitment processes in the CARE pilot trial (32; 33; 34). Embedding a QRI allows the identification and understanding of generic and trial-specific recruitment challenges (35; 36; 37), and enables the development of tailored plans to address these issues. A QRI (38) has been integrated into over 30

1  
2 RCTs, including trials comparing surgery and medical management (39) and there is  
3 observational evidence of the benefits associated with a QRI in at least five RCTs  
4 (40).  
5  
6

### 7 **1.2.3 This feasibility study and pilot trial will inform the feasibility of a** 8 **definitive main phase trial** 9

10 The NIHR HTA commissioned a UK feasibility study and pilot phase RCT to  
11 demonstrate the ability to recruit enough patients to answer the research questions  
12 and sufficient numbers in the UK such that the trial results would be applicable to the  
13 NHS. The CARE pilot trial was funded by this NIHR HTA commissioned call. A  
14 decision about whether to proceed a definitive main phase trial will be made in light  
15 of the results of the CARE pilot trial.  
16  
17

### 18 **1.2.4 Patient, carer and public involvement (PCPI)** 19

20 Between August 2014 and November 2015 we worked with people with cavernoma,  
21 carers, and representatives of the patient support organisation Cavernoma Alliance  
22 UK (CAUK) on the Steering Group of the James Lind Alliance Priority Setting  
23 Partnership that identified and prioritised the topic of this application as the top  
24 priority for further research into cavernoma. Since November 2015, individuals in the  
25 Steering Group of the James Lind Alliance Priority Setting Partnership – including  
26 patients and carers – were involved in reviewing the commissioning brief for the  
27 NIHR HTA commissioned call for research. In May-June 2016, we worked with  
28 CAUK to gather the views of patients and carers who are members of the  
29 organisation, about research to address this top priority for further research into  
30 cavernoma. We consulted 731 CAUK members affected by cavernoma or  
31 parents/guardians of affected children, by emailing them a link to a web-based  
32 survey describing the CARE trial. 70% of respondents had not received surgical  
33 management for a cavernoma and a minority (28%) of these respondents indicated  
34 that they would not participate in the RCTs proposed. Between December 2018 and  
35 June 2019, we consulted representatives and members of CAUK, including patients  
36 with the condition, who have reviewed and shaped the design of the CARE pilot trial.  
37 In July 2019, all members of CAUK were invited by the Chief Executive of the  
38 organisation to participate in a focus group on 6th July. Four carers, six patients, the  
39 Chief Executive Officer of CAUK and the Chief Investigator (CI) attended the  
40 meeting. This focus group of patients, carers, and family members considered the  
41 overall design of this project. The main themes of the discussion were: (1) The group  
42 recognised that, "many people have had to make difficult decisions without the  
43 information they need" and that in addressing this "difficult dilemma", their  
44 involvement could improve participation by contributing their 'lived experience' of  
45 brain cavernoma to the clinical experience of the co-applicants and the planned  
46 qualitative research; (2) The group approved the extent of the patient and public  
47 involvement that is planned; (3) The group wanted the CARE pilot trial to be as  
48 inclusive of patients as possible. In particular, they wanted the CARE pilot trial to  
49 include patients who have: (a) first presented with symptoms or been diagnosed  
50 some time ago, (b) multiple cavernomas (one of which might have been treated), and  
51 (c) partially treated cavernoma (for whom there is uncertainty about further  
52 treatment); (4) All participants approved the project's design. In particular, they  
53 approved a choice of the safest treatment according to cavernoma location, using the  
54 "wealth of experience" of the clinical community in the UK, permitting patient  
55 preferences, and allowing treatment if needed during follow-up; (5) The group  
56 accepted that participants would receive standard care; (6) The group asked not only  
57 that the project should include a diverse sample of patients with brain cavernoma, but  
58  
59  
60

also that the analyses should account for this diversity (e.g. age, time since symptoms, single vs. multiple cavernoma, and genetic mutations).

## 2 STUDY OBJECTIVES

### 2.1 OBJECTIVES

#### 2.1.1 Primary objective

Assess the feasibility of performing a definitive main phase of a RCT comparing medical management to medical and surgical management (with neurosurgery or stereotactic radiosurgery) for improving outcome for people with symptomatic brain cavernoma.

#### 2.1.2 Secondary objectives

- Set up a collaboration of the patient advocacy organisations for cavernoma in the UK and Ireland and representatives of clinical neurology, neurosurgery, and stereotactic radiosurgery at neuroscience centres throughout the UK and Ireland.
- Evaluate screening logs and conduct qualitative research with patients and clinicians to understand recruitment processes and barriers, as well as actions to address any barriers, as part of a QuinteT recruitment intervention (QRI) to optimise informed consent and recruitment.
- Conduct the CARE pilot trial for approximately 60 patients with symptomatic brain cavernoma, comparing medical management of the brain cavernoma versus medical and surgical management (neurosurgery or Gamma Knife stereotactic radiosurgery) for improving outcome.

### 2.2 OUTCOMES

#### 2.2.1 Primary outcome

We will estimate these measures of feasibility to inform the extent to which international cooperation would be needed to recruit an adequate sample size in a CARE definitive main phase RCT, and what proportion of participants might be recruited from the UK during the study:

1. What proportion of the collaborating centres take part and recruit participants to the CARE pilot trial?
2. Can the investigators implement trial procedures correctly?
3. What proportion of screened patients is eligible?
4. What proportions of eligible patients are approached and randomised (and why are eligible patients not approached or not randomised)?
5. What is the distribution of participants between neurosurgery and stereotactic radiosurgery?
6. Do participants adhere to the allocated intervention and follow-up?
7. How complete are baseline, imaging and outcome data?
8. What are the outcome event rates?

9. How do the baseline characteristics, outcome event rates and differences between treatment groups compare to observational data about outcomes during medical management or after medical and surgical management?
10. What estimates of effect size/variability should be used in the design of the CARE definitive main phase trial?
11. What is the sample size required for a definitive trial to address the overall question over a 10-year follow-up?
12. Can the CARE pilot trial data describe care pathways, linked to health states and outcomes, to develop a robust economic model to evaluate cost effectiveness in a CARE definitive main phase trial?
13. Which international research partners in other countries could contribute to the CARE definitive main phase trial?

## 2.2.2 Primary clinical outcome

Intracranial haemorrhage or new persistent/progressive focal neurological deficit due to brain cavernoma or surgical management (neurosurgery or stereotactic radiosurgery), whether fatal (leading to death within 30 days of the outcome event) or non-fatal.

### 2.2.2.1 Intracranial haemorrhage

The definition of an intracranial haemorrhage attributable to brain cavernoma is, “a clinical event involving both acute or subacute onset symptoms (any of headache, epileptic seizure, impaired consciousness, new/worsened focal neurological deficit referable to the anatomic location of the cavernous malformation as well as radiological, pathological, surgical, or rarely only cerebrospinal fluid evidence of recent extra- or intra-lesional haemorrhage. The mere existence of a haemosiderin halo, or solely an increase in cavernoma diameter without other evidence of recent haemorrhage, are not considered to constitute haemorrhage” (3).

### 2.2.2.2 New persistent/progressive focal neurological deficit

The definition of a non-haemorrhagic focal neurological deficit attributable to brain cavernoma is, “a new or worsened focal neurological deficit referable to the anatomic location of the brain cavernoma, which may present with other clinical features of intracranial haemorrhage, but without evidence of recent blood on timely brain imaging or pathological examination, or examination of the cerebrospinal fluid. These cases may be accompanied by an increase in cavernoma diameter alone or oedema on brain MRI (3).

The definition of a focal neurological deficit (not otherwise specified) attributable to brain cavernoma is identical to non-haemorrhagic focal neurological deficit, with the exception that pathological investigation, cerebrospinal fluid examination, or timely brain imaging have not been performed at all or at the correct time to establish whether haemorrhage, oedema, or cavernoma growth underlie the clinical deterioration (3). These focal neurological deficits may be persistent (lasting >24 hours, and staying static or improving), or progressive (lasting >24 hours with further deterioration) (3).

New persistent/progressive focal neurological deficits attributable to brain cavernoma treatment may be referable to the anatomic location of the brain cavernoma (e.g. haemorrhage after neurosurgical treatment, or radionecrosis from stereotactic radiosurgery) or referable to other regions of the brain (e.g. intracranial abscess following neurosurgical excision).

### 2.2.3 Secondary clinical outcomes

During the CARE pilot trial, investigators will collect data on the risk of several clinical primary and secondary outcomes to inform the design of a main phase RCT. The following secondary clinical outcomes will be measured at each 6-month follow-up review:

1. Death not due to a primary clinical outcome
2. Liverpool Seizure Severity Scale plus epileptic seizure frequency (number of seizures in the preceding four weeks, and attainment of one-year seizure freedom)
3. Modified Rankin Scale (mRS) score
4. National Institute of Health Stroke Scale Score (adult or paediatric)
5. EQ-5D-5L in adults and EQ-5D-Y in children
6. Karnofsky Performance Status (KPS) scale in adults and Lansky Play-Performance Scale (LPPS) in children

We will also collect data to estimate health service use and healthcare and socioeconomic costs during the entire duration of follow-up.

### 2.2.4 Feasibility metrics proposed to the funder

The NIHR HTA has been provided with the following criteria for success, although these are not specific secondary outcomes of the CARE pilot trial:

- At least 30 sites in the UK and Ireland collaborate
- Project delivered according to the major milestones identified in the NIHR HTA project management plan
- Recruitment to within 10% of target
- Brain cavernoma radiographic diagnosis confirmed by expert neuroradiologist review in >95% of participants recruited
- Retention of >95% of participants at six months
- <10% treatment group switches or loss to follow-up
- QuinteT recruitment intervention is associated with an improvement in recruitment
- CARE definitive main phase trial appears feasible and affordable

## 3 STUDY DESIGN

The CARE pilot trial is a two-arm, parallel group randomised feasibility trial which aims to estimate the feasibility of performing a definitive main phase RCT comparing medical management to medical and surgical management (with neurosurgery or Gamma Knife stereotactic radiosurgery, according to their availability in clinical practice) for improving outcomes for people with symptomatic brain cavernoma. An integrated QRI aims us to understand recruitment barriers (e.g. related to selection of patients during screening and recruitment processes or equipoise), and optimise informed consent and recruitment processes in the CARE pilot trial (32; 33; 34). Participants will be recruited in secondary care settings in the UK and Ireland, from a collaborative network of research sites, with input from the patient advocacy organisation CAUK. Randomisation will allocate participants to groups in a 1:1 ratio, stratified by preferred type of surgical management, but if there is no clear preference for the type of surgical management, and both are available, the patient will be allocated to either neurosurgery or stereotactic radiosurgery (see section 3.1).



3.1 TRIAL PROFILE

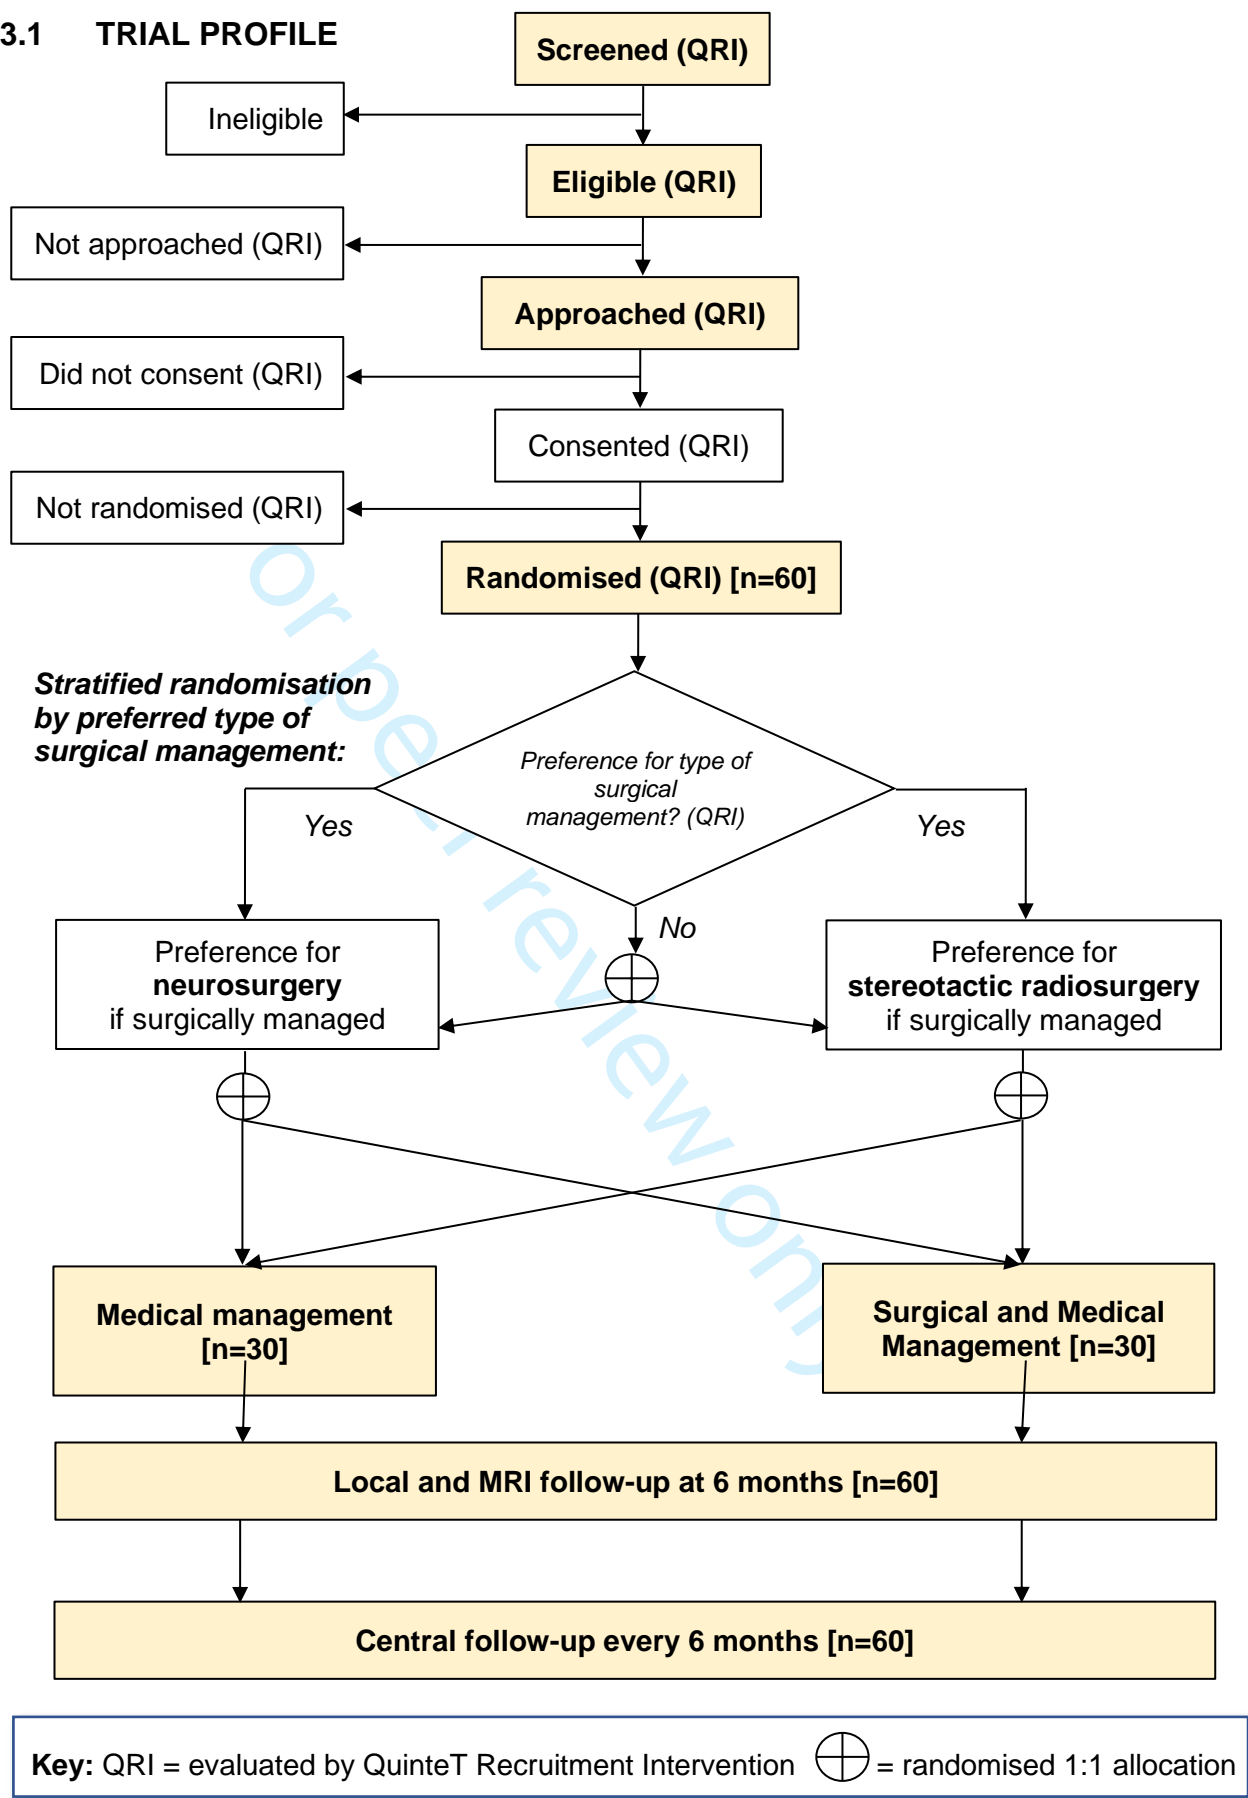

### 3.1.1 QuinteT recruitment intervention

The QuinteT recruitment intervention (QRI) has been presented as two distinct stages for clarity (data collection followed by feedback and training). In reality these are likely to overlap or run in tandem. For instance, new avenues of enquiry may emerge through feedback meetings, which can be a route to investigating recruitment difficulties in their own right. Insights into recruitment can emerge at any point during the RCT and instigate further investigations or intervention.

#### 3.1.1.1 Phase 1

##### 3.1.1.1.1 *Before the CARE pilot trial begins recruitment*

The QuinteT researcher will conduct a qualitative evaluation of what may influence recruitment during study set-up, combining evidence from previous QuinteT recruitment interventions (35; 36; 37; 38; 39; 40) and training programmes (41; 42), with data collected from patient and professional groups involved in CARE.

Qualitative work will include focus groups with healthcare professionals to explore views on eligibility and equipoise. Healthcare professionals' views will be explored in online workshops, to which we will invite relevant clinical members of the Trial Management Group (TMG), 'Consultant Cavernoma Contacts' and investigators at collaborating sites. These workshops will explore differences in views between individuals and clinical specialties regarding equipoise and identify criteria to determine patient suitability for neurosurgery or stereotactic radiosurgery, previously identified by the study team as difficult to operationalise. Discussions will also cover patient pathways into the trial, processes and management options for those declining participation, what each intervention arm involves, including potential risks and benefits, plans for follow up within the CARE pilot trial and possible advantages and disadvantages of taking part. We will organise these workshops with clinicians to maximise attendance, convenience, and efficiency by holding them virtually. The work described in this paragraph is for information only and is covered by a separate Research Ethics Committee (REC) approval (University of Bristol, Faculty of Health Sciences Research Ethics Committee Reference 111186). Qualitative work involving focus groups with healthcare professionals is therefore not covered under this protocol.

Insights into patient views to inform development of patient-facing materials, inform the design of the pathway into the trial and provide insight into the acceptability of participation in the CARE pilot trial will be obtained through the QuinteT researcher observing all CARE pilot trial Patient, carer and public involvement Advisory Group (PAG) meetings at which such issues are discussed.

A QuinteT researcher will observe all TMG and TSC meetings during which the study protocol is developed and finalised, with a focus on discussions and final presentation of equipoise and eligibility criteria.

Insights from focus groups with professionals and observation of the TMG, TSC and PAG discussions will inform the content of patient-facing information for the CARE pilot trial and site initiation visits for recruiters. The QuinteT team will provide guidance for recruiters to present CARE pilot trial information to eligible patients, carers and families during site training and initiation (see section 16.2.5.1). Guidance will raise recruiter awareness of key 'hidden' challenges when trying to recruit patients to trials comparing medical management with medical and surgical management and how these can be addressed (35; 42), as well as including insights into particular issues identified as relevant to the CARE pilot trial in how to deal with

1  
2 preferences and convey equipoise between medical management and medical and  
3 surgical management.  
4

#### 5 6 3.1.1.1.2 *During CARE pilot trial recruitment*

7  
8 As recruitment to the CARE pilot trial begins, recruitment processes will be  
9 investigated in-depth at study sites as they open. A QuinteT researcher will use a  
10 multi-faceted, flexible approach using triangulation of the following data to investigate  
11 site-specific or more general recruitment obstacles (34): screening logs (section 5.3);  
12 recording of recruitment consultations between recruiters and patients (section **Error!**  
13 **Reference source not found.**); in-depth interviews with members of the TMG,  
14 recruiters, and participants (section 9.4.3); review of study documents (section 9.4.5)  
15 and observation of monthly TMG meetings (section 9.4.4).  
16

#### 17 18 3.1.1.2 Phase 2

19 Findings from phase 1 will be presented to the CI and TMG. If recruitment difficulties  
20 are evident across the trial or at particular sites, the CI/TMG and QuinteT team will  
21 formulate a 'plan of action' to improve recruitment and information provision. The  
22 specific plan implemented will be grounded in the findings from analysis of the data  
23 above, with its format dependent on the nature of the recruitment barriers identified  
24 (see section 16.2.5.1).  
25  
26  
27

## 28 29 4 STUDY POPULATION

### 30 31 4.1 NUMBER OF PARTICIPANTS

32 We aim to enrol approximately 60 participants over an estimated 18 months at  
33 approximately 45 sites in the UK and Ireland. Patient follow-up will end approximately  
34 6 months after recruitment finishes.  
35  
36  
37  
38  
39

### 40 41 4.2 INCLUSION CRITERIA

- 42 1. People of any age
- 43 2. At least one brain cavernoma diagnosed by brain MRI that included a  
44 gradient echo or susceptibility-weighted sequence, according to standard  
45 diagnostic criteria (15; 43)
- 46 3. Clinical history attributable to a brain cavernoma of:
  - 47 a. Symptomatic stroke due to intracranial haemorrhage (3), or
  - 48 b. Symptomatic stroke due to a persistent or progressive non-  
49 haemorrhagic, or not otherwise specified, focal neurological deficit (3),  
50 or
  - 51 c. Epileptic seizure(s) meeting the definition of definite or probable  
52 cavernoma-related epilepsy (44)
- 53 4. Patient and doctor are uncertain about medical management or medical and  
54 surgical management of the symptomatic brain cavernoma, following  
55 consultation with a neurosurgeon
- 56 5. Patient has mental capacity to consent for themselves (adult participants or  
57 paediatric participants with capacity) or parent/legal guardian provides  
58 consent (paediatric participants).  
59  
60

There is no upper time limit on when a patient may be recruited following the symptomatic presentation and diagnosis of a brain cavernoma.

Patients with multiple brain cavernomas, at least one of which has been symptomatic and not undergone removal/obliteration by surgical management, may be included.

In the case of prior surgical management (with neurosurgery or stereotactic radiosurgery), patients with a symptomatic brain cavernoma that has not been completely removed/obliterated by prior surgical management may be included.

### 4.3 EXCLUSION CRITERIA

1. Surgical management of a solitary symptomatic brain cavernoma with MRI evidence of cavernoma removal/obliteration
2. Spinal cavernoma alone, without symptomatic brain cavernoma
3. Asymptomatic brain cavernoma. Patients with radiographic cavernoma enlargement (with or without intralesional haemorrhage) but without new symptoms are still regarded as asymptomatic.
4. Previously randomised in the CARE pilot trial

### 4.4 CO-ENROLMENT

Inclusion in another RCT or observational study does not preclude participation in the CARE pilot trial as long as: participants are not overburdened; their inclusion would be unlikely to confound the CARE pilot trial's results or complicate attribution of serious adverse events and outcomes; the protocol of the other study does not preclude co-enrolment in the CARE pilot trial; and co-enrolment has been agreed with the Chief Investigators of all studies involved in co-enrolment. Research staff should obtain permission to enrol patients who are participants in other trials from the CI. A record of participants who are known to have been co-enrolled in other studies will be maintained by the TCC.

## 5 PARTICIPANT SELECTION AND ENROLMENT

### 5.1 IDENTIFYING AND SCREENING PARTICIPANTS

For a patient to be eligible for the trial, the patient and doctor must be uncertain about medical management or medical and surgical management of the symptomatic brain cavernoma. In standard clinical practice, decisions about medical management or medical and surgical management of symptomatic brain cavernomas are usually made with patients and neurologists or neurosurgeons, following discussions at multi-disciplinary meetings that may involve any or all of neurologists, neurosurgeons, stroke physicians, and radiologists. We expect uncertainty about medical management or medical and surgical management to be established during discussion between a patient and their doctor. In clinical practice, multidisciplinary meetings involving neurologists and neurosurgeons may confirm this uncertainty as well as suitability for either type of surgical management; sometimes, these multidisciplinary meetings manage this uncertainty by arriving at a consensus opinion, but investigators should note that this may make recruitment to the CARE pilot trial less likely.

The principal investigator (PI), or another clinician with delegated responsibility, is responsible for confirming eligibility for the trial, however delegated research team members can identify eligible patients. Research team members delegated this role should be members of, or affiliated to, the clinical care team. These people may identify potentially eligible patients using several sources at their site, including but not limited to data on admissions, outpatient appointments, referrals, and brain imaging that record:

- New diagnoses of symptomatic brain cavernoma made in everyday clinical practice during the recruitment period.
- Diagnoses of symptomatic brain cavernoma made at any time before the recruitment period, identified by searches of clinical or imaging databases, or clinicians' own records.
- Referrals from colleagues at other hospitals in the UK and Ireland.

Verification of eligibility will require delegated research staff to access patient medical notes.

The TMG will apply to use the Association of British Neurologists' Rare Diseases Ascertainment and Recruitment platform (RaDAR; <https://www.theabn.org/general/custom.asp?page=radar>), which is used by neurologists to indicate that they have seen a patient with a specified rare neurological disease (such as brain cavernoma). Once a neurologist notifies RaDAR that they have seen a patient, the neurologist will be sent the patient information leaflet about the trial to send to the patient, who can be referred to their local trial site if they are interested in discussing participation.

CAUK (and affiliated groups such as Cavernoma Ireland and Cavernoma Scotland) will share information about the trial through their website, social media platforms and any other communications channels used by them. Patients who contact, or are members of, one of the patient support organisations will be made aware of the CARE pilot trial and informed about what the CARE pilot trial involves by a CAUK member of staff. If these patients are interested in finding out more and being screened for their eligibility, CAUK may direct them to information about a Consultant Cavernoma Contact at an appropriate CARE pilot trial site. The role of CAUK will be provision of information to patients; patients will be advised to speak with their clinician about decisions related to their medical care. CAUK will record the number of patients who they identify as potentially suitable for the CARE pilot trial and suggest referral to a Consultant Cavernoma Contact.

The CI and other members of the TMG will raise awareness of the trial amongst the clinical community through presentations at conferences and meetings. This could result in referral of patients to CARE pilot trial recruitment sites from other hospitals in the UK and Ireland.

## 5.2 APPROACHING AND CONSENTING PARTICIPANTS

Patients in the UK and Ireland will be approached and invited to take part in adult and paediatric neurology, neurosurgery, and stroke services in secondary care, or one of the stereotactic radiosurgery services that are commissioned to provide stereotactic radiosurgery for cavernoma (29). Eligibility may have been determined by a multidisciplinary discussion, but eligible patients should be approached for recruitment to the CARE pilot trial during or after consultation with a specialist in the type of treatment that is thought to be most effective for the surgical management of the brain cavernoma. Delegated research staff involved in approaching eligible patients should be members of, or affiliated to, the clinical care team.

Potential adult participants or the parent/guardians of potential paediatric participants may be approached in person or by telephone (or another technology that supports remote consultations e.g. NHS Near Me). An invite letter may be sent in advance of approaching the patient. The short and supplementary PIL will be used to introduce and discuss the trial.

There is no specific time window for approaching eligible patients for their consent (see section 4.2 above), but they should be approached whenever uncertainty arises about whether to pursue medical management or medical and surgical management of a symptomatic brain cavernoma. The oral explanation given should be performed by the PI or another member of the research team delegated to perform this task and must cover all the elements specified in the relevant PIL and ICF. The patient or the parent/guardian will be given as much time as they require to consider the study information and given every opportunity to ask questions.

The PI or another clinician with delegated responsibility, is responsible for confirming eligibility for the trial, ensuring informed consent is obtained and that the informed consent form (ICF) is signed and dated by all parties before randomisation and any protocol-specific procedures are carried out. Local research staff should follow the laws that govern consent procedures in their jurisdiction. Members of the research team will have undergone standardised training on trial-related procedures. Health Research Authority guidance on applying a proportionate approach to seeking consent has been followed (45). Adult patients lacking mental capacity to consent for themselves will not be included in this trial (see section 4.2). If an adult patient loses mental capacity during the course of the research and subsequently regains mental capacity, their consent to continue taking part in the trial will be confirmed.

Face to face informed consent discussions with potential participants may not be feasible (e.g. due to the COVID-19 pandemic). In order to avoid patients making additional trips to hospital, written informed consent may be recorded in the following ways (in addition to being done in person):

1. Remotely

When completed remotely, the patient should return the signed form, or a scan or legible photograph of all sections of it, to a research team member at the recruiting site by email, by post or in person..

2. Electronically (using an online form)

The following options may be employed to complete consent electronically:

- The consent form may be completed and signed electronically where an approved mechanism is available such as DocuSign.
- An electronic consent form, generated via the trial database. Participants providing consent using the online form will be required to enter a typewritten signature.

In both cases, the form should be countersigned by the research team member taking consent. There is no requirement that the counter-signature date match the date of the participant signature but the counter-signatory must be satisfied that the consent is genuine.

Regardless of the method of consent, patients or parent/guardians will be provided with information in-person, by post or by email to consider before providing consent.

The information will be discussed with the patient or parent/guardian as outlined above.

Confirmation of eligibility, consent, and the version of the PILs used should be recorded in the participant's paper and/or electronic medical records for any future source data verification, including the date of consent (and child's assent if relevant), that the participant received the PILs, who obtained consent, and signed and dated confirmation that the patient was eligible for enrolment.

Patients will be given the opportunity to consent to any or all of the following:

- Consent to recording their recruitment consultation(s) to inform the QuinteT recruitment intervention
- Consent to taking part in an interview to inform the QuinteT recruitment intervention
- Consent to participate in the CARE pilot trial

### 5.2.1 Consent to the QRI

All eligible patients who are approached to take part will be invited to take part in an interview with the qualitative researcher about their experiences of being invited to join the CARE pilot trial.

Some study centres will also be involved in audio-recording conversations where the CARE pilot trial is discussed (including conversations held in person and by remote methods). In study centres selected to participate in collecting audio-recordings, eligible patients will be invited to consent to these conversations being audio-recorded, before discussion of the CARE pilot trial begins. Information on the rationale and process for recording recruitment discussions is covered in the relevant CARE PIL. Missed recordings of recruitment conversations are not required to be recorded as protocol deviations.

Participants will be given sufficient time to consider whether they wish to take part in the QRI. Participants will only be consented if they and the local research team feel they have had enough time to consider and ask questions about the QRI. Consent to take part will be documented on the relevant verbal and/or written consent forms. Written consent to audio-recordings will cover all future recruitment discussions. Patient participation in both interviews and audio-recordings is optional. If written consent to record conversations is given, the recordings will be transferred to the University of Bristol for analysis (see section 10.3.1). If no written consent form is received, all recordings for that participant will be deleted, no further recordings will be made and no invitation to interview extended.

### 5.2.2 Consent to participate in the CARE pilot trial

#### 5.2.2.1 Adults

The participant will be asked to complete a consent form. The research team member and the participant should each sign and date the ICF to confirm that consent has been obtained. Written informed consent should always be sought from the participant where possible. If this is not possible because the participant cannot write, the member of the research team can gain witnessed verbal consent. The participant should receive a copy of the completed ICF, a copy should be filed in the patient's medical records and the original ICF should be filed in the investigator site file (ISF) along with the randomisation form. The participant should also receive a copy of the current PIL.

### 5.2.2.2 Children

Children's PILs are available for children 0-5 years old, 6-10 years old and 11-16 years old. Children aged 6-10 and 11-15 who are capable of understanding it will be given the option of providing assent.

The parent/guardian should receive a copy of the current parent/guardian short and supplementary PIL and appropriate children's PIL. If the parent/guardian wishes for the child to participate in the CARE pilot trial, then they will be asked to sign the ICF. Both the parent/guardian and the person delegated to take consent will each sign and date the ICF. The parent/guardian should receive a copy of the fully completed ICF, a copy should be filed in the patient's medical records and the original ICF should be filed in the investigator site file (ISF) along with the randomisation form. The same would apply in the case of assent being given.

#### 5.2.2.2.1 *Children and young people in England, Wales and Northern Ireland*

Health Research Authority (HRA) guidance states (46):

- "There is no statute in England, Wales or Northern Ireland governing a child's right to consent to take part in research other than a Clinical Trial of an Investigational Medicinal Product (CTIMP), i.e. consent for non-CTIMPs. However common law presumes that young people aged between 16 and 18 are usually competent to give consent to treatment."
- "Case law suggests that if a young person has sufficient understanding and intelligence to understand fully what is proposed, and can use and weigh this information in reaching a decision (i.e. they are 'Gillick competent'), he or she can give consent to treatment."
- "In the absence of law relating specifically to research, it is commonly assumed that the principle of 'Gillick competence' can be applied not only to consent for treatment, but also to consent for research."
- "When a young person is believed to be competent, consent from those with parental responsibility is not legally necessary. However, the involvement of parents in decision-making is encouraged in most circumstances."
- "When a child or young person is not competent, the Children Act and the Children Act (Northern Ireland) Order permits parents (and those with parental responsibility) to consent to medical treatment on their behalf. Consent of only one parent is required."

#### 5.2.2.2.2 *Children and young people in Scotland*

Health Research Authority (HRA) guidance states (47):

- "There is no specific provision in Scots law governing a child's right to consent to take part in research, other than a Clinical Trial of an Investigational Medicinal Product (CTIMP), i.e. consent for non-CTIMPs."
- In the case of medical treatment, "young people aged 16 and over are deemed to be competent to give consent for medical treatment unless proven otherwise. Children and young people under 16 have a statutory right to give consent to surgical, medical or dental procedures or treatments if they are deemed, by a medical practitioner, to be competent to do so."
- "It is commonly accepted that we can extrapolate a child / young person's right to give consent for treatment, to give them the right to give consent to



1  
2 take part in non-CTIMP research. It is commonly assumed that they also have  
3 a legal right to object to participation.”

- 4  
5 • “The Children (Scotland) Act permits parents (or those with parental  
6 responsibility) to give consent on behalf of a young person under 16 who is  
7 not competent. Consent of only one parent is required.”

8  
9 The above guidance will be followed for this trial in relation to participants in Scotland  
10 under the age of 16.

#### 11 12 5.2.2.2.3 *Children and young people in the Republic of Ireland*

13  
14 Consent will be obtained in line with ICH-GCP and all applicable laws and  
15 regulations. In line with the HSE National Consent Policy, consent to a child’s  
16 participation in a study must be obtained from a parent/legal guardian for all  
17 paediatric participants under 18 years old (48). Whenever the child has sufficient  
18 competence to provide it, a child’s assent must be sought in a child-appropriate  
19 manner.  
20

#### 21 22 5.2.2.2.4 *Re-consenting paediatric patients*

23  
24 When a child recruited into the trial reaches the age of 16 years (or 18 years old in  
25 the Republic of Ireland) and is therefore deemed competent to provide consent, they  
26 should be re-consented if still willing to participate at their next 6-month follow up  
27 review. No further data will be collected until a signed consent form has been  
28 received.  
29

### 30 31 5.2.3 **Consent to be contacted for an interview exploring reasons for declining 32 participation**

33  
34 Patients or their parents/carers who decline participation in the CARE pilot trial will be  
35 invited to consent to take part in an interview with the QRI researcher, exploring their  
36 experiences of being approached and invited to take part in the study. Where  
37 parents/carers consent to take part in an interview, it will be acceptable for the  
38 child/young person to attend and contribute if they choose.  
39  
40

## 41 42 5.3 **SCREENING AND ENROLMENT LOGS**

43  
44 Research teams at each site will use screening logs to record non-identifying  
45 demographic and clinical details of patients who are screened, including: initials, age  
46 (years), sex, brain cavernoma diagnosis (yes vs. no), brain cavernoma location  
47 (brainstem vs. other), type of brain cavernoma presentation (symptomatic [type] vs.  
48 not symptomatic), prior treatment of brain cavernoma, patient certainty about brain  
49 cavernoma treatment (yes vs. no, with preferences), clinician certainty about  
50 cavernoma treatment (yes vs. no, with preferences), eligibility for the CARE pilot trial  
51 (yes vs. no, with reasons for ineligibility), whether approached to take part (yes vs.  
52 no, with reasons for not approaching), whether consent was given to the CARE pilot  
53 trial (yes vs. no, with reasons for declining), and whether the patient was randomised  
54 in the CARE pilot trial (yes vs. no, with reasons for not being randomised and  
55 preferred management outside of CARE).  
56  
57

58  
59 Collection of this information is essential to fulfilling the objectives of the feasibility  
60 study that will determine whether a CARE definitive main phase trial could proceed

(see section 2.2.1 above). The proportions of screened patients who are eligible, approached, agree to take part, and randomised (see trial profile, section 3.1) will be quantified to identify points in the recruitment pathway at which patients are being 'lost' to recruitment. Screening logs will be analysed according to the SEAR (Screened, Eligible, Approached, Randomised) framework (49).

## 5.4 RANDOMISATION

### 5.4.1 Randomisation procedures

If consent to randomisation in the CARE pilot trial is provided, complete baseline data must be collected by the research team at the baseline visit before randomisation. These data include demographic, clinical, and radiographic information, as well as the consensus preference agreed between each patient and their clinician for neurosurgery or Gamma Knife stereotactic radiosurgery should randomisation allocate them to medical and surgical management (if there is no clear preference for the type of surgical treatment, and both are available in clinical practice, the patient will be randomly allocated to neurosurgery or Gamma Knife stereotactic radiosurgery; see section 3.1). Participants in these two strata will be assigned 1:1 to medical management or medical and surgical management using permuted blocks. Allocation will be concealed until participants are enrolled and assigned by using central web-based randomisation.

A detailed description of the randomisation system including details on block size is held in the statistics master file by Edinburgh Clinical Trials Unit (ECTU).

### 5.4.2 Treatment allocation

The participant, or the parent/guardian of paediatric participants, and research team at the recruiting site will be notified of the assigned treatment allocation after randomisation.

### 5.4.3 Blinding (masking)

Treatment allocation in the CARE pilot trial is not blinded (masked), and is therefore open to participants, the clinicians caring for them and local research staff.

We will aim to keep outcome event assessors blind to treatment allocation. We will aim to measure how often assessors are unblinded to treatment allocation during the process of event adjudication.

## 5.5 WITHDRAWAL OF PARTICIPANTS

Participants are free to completely withdraw, or discontinue any individual component of the study, at any point or a participant can be withdrawn by the PI. In the case of loss of mental capacity in adult participants during the trial, researchers will follow the appropriate local regulations and guidance regarding loss of mental capacity in research (noting that these differ between nations, see below). The participant will remain in the trial unless withdrawn by their representative. Data collected until the time of withdrawal will be retained. If withdrawal occurs, the primary reason for

1  
2 withdrawal must be documented in the participant's case report form (CRF). The  
3 participant will have the option of withdrawal from any or all of:

- 4 • consent to be contacted about other research studies
- 5 • consent to recording of recruitment conversation(s)
- 6 • consent to complete a recorded interview with the QuinteT researcher
- 7 • DNA sample provision
- 8 • allocated treatment policy
- 9 • in-person follow-up
- 10 • brain MRI at 6-months
- 11 • participant postal follow-up questionnaires
- 12 • participant follow-up questionnaire conducted by telephone
- 13 • long-term follow-up using record linkage
- 14 • use of de-identified data or brain imaging by other research studies

### 15 16 17 18 **5.5.1 Loss of mental capacity in adult participants in England and Wales**

19  
20 In England and Wales, regulations advise that advice should be sought from the  
21 participant's representative on whether the research should be carried out in relation  
22 to the participant and what they think the wishes and feelings of the participant would  
23 be if they had mental capacity (50).

24  
25  
26 Where the participant representative (consultee) requests that the participant who  
27 has lost mental capacity be withdrawn, a delegated member of the research team will  
28 discuss with this person to determine if they think the participant should be withdrawn  
29 taking into consideration what the wishes and feelings of the participant would be  
30 thought to be if they still had the mental capacity to decide for themselves. If it is  
31 agreed that the participant should be withdrawn from the trial, the appropriate trial  
32 form will be completed.

### 33 34 35 **5.5.2 Loss of mental capacity in adult participants in Scotland**

36  
37 In Scotland, there is no specific legal provision for adults who lose capacity while  
38 taking part in non-CTIMPs. We will respect the participant's original consent to take  
39 part however will also consider the participant's representative's views.

40  
41  
42 Where the participant representative (nearest relative, welfare attorney or welfare  
43 guardian) requests that the participant who has lost mental capacity be withdrawn, a  
44 delegated member of the research team will discuss with this person to determine if  
45 they think the participant should be withdrawn taking into consideration what the  
46 wishes and feelings of the participant would be thought to be if they still had the  
47 mental capacity to decide for themselves. If it is agreed that the participant should be  
48 withdrawn from the trial, the appropriate trial form will be completed (51).

### 49 50 51 **5.5.3 Loss of mental capacity in adult participants in Northern Ireland**

52  
53 In Northern Ireland, section 138 of Part 8 of the Mental Capacity Act (Northern  
54 Ireland) 2016 applies which states that consent can be considered to endure  
55 provided that the study has not changed significantly since consent was given. We  
56 will respect the participant's original consent to take part however will also consider  
57 the participant's representative's views.

58  
59  
60 Where the participant representative (consultee) requests that the patient who has  
lost mental capacity be withdrawn, a delegated member of the research team will

1  
2 discuss with this person to determine if they think the participant should be withdrawn  
3 taking into consideration what the wishes and feelings of the participant would be  
4 thought to be if they still had the mental capacity to decide for themselves. If it is  
5 agreed that the participant should be withdrawn from the trial, the appropriate trial  
6 form will be completed (52).  
7  
8

#### 9 **5.5.4 Loss of mental capacity in adult participants in the Republic of Ireland**

10 Health Service Executive Policy (48) states that:

11 “Outside of clinical trials, there is currently no legal framework for a person who lacks  
12 decision-making capacity to participate in research. In the absence of any such legal  
13 regulations, it is recommended that as a matter of best practice the same principles  
14 should apply to both clinical trials and other forms of research. This means that  
15 consent for participation in any form of research on behalf of an adult lacking  
16 decision-making capacity must be obtained from the person’s legal representative”.

17 The same policy defines ‘legal representative’ as:

18 “...a person not connected with the conduct of the trial who by virtue of his/her family  
19 relationship with an adult lacking decision-making capacity, is suitable to act as the  
20 legal representative and is willing and able to do so or (if there is no such individual)  
21 a person who is not connected with the conduct of the trial, who is a solicitor  
22 nominated by the relevant health care provider.”.  
23  
24  
25  
26  
27  
28

## 29 **6 COMPARATOR**

30  
31 Medical management constitutes standard medical care alone for brain cavernoma,  
32 according to UK guidelines (8). This may include anti-epileptic drug therapy to  
33 prevent epileptic seizures (e.g. following the recommendations of the Surgical Task  
34 Force of the ILAE Commission on Therapeutic Strategies (44)), rehabilitation of  
35 neurological deficits (e.g. physiotherapy, speech and language therapy), medical  
36 treatment of other neurological symptoms (e.g. headache, body pain, spasticity,  
37 dysaesthesia), and psychological support. Provision of these interventions varies  
38 because of the extent of the evidence to support their use, and their availability in  
39 everyday clinical practice around the UK and Ireland according to the nature of  
40 regional and national healthcare systems.  
41  
42

43 Some clinicians arrange repeat brain MRI for patients with brain cavernoma. This  
44 may be done with good reason in order to confirm the diagnosis following intracranial  
45 haemorrhage, in case of diagnostic doubt, to guide treatment decisions, or to  
46 investigate new symptoms as recommended by recent guidelines (15). But in other  
47 cases repeat brain MRI is done to ‘monitor’ brain cavernomas to reassure patients,  
48 although the evidence that this strategy is beneficial is lacking.  
49  
50  
51

## 52 **7 INTERVENTION**

53  
54 Medical and surgical management in the CARE pilot trial is defined as neurosurgical  
55 excision or Gamma Knife stereotactic radiosurgery for brain cavernoma, in addition  
56 to all components of medical management described in section 6 above. These  
57 interventions will be accessed and delivered according to what is available in  
58 standard clinical practice in the participant’s health service.  
59  
60

1  
2 It is expected (but not mandated by the trial protocol) that surgical management will  
3 be delivered within 3 months of randomisation to the trial.  
4  
5

## 6 **7.1 Neurosurgical excision**

7  
8 Surgery will be undertaken by a consultant neurosurgeon responsible for  
9 neurosurgical aspects of the clinical care of the cavernoma patient in CARE. The  
10 neurosurgical technique employed will be that used by the consultant neurosurgeon  
11 in clinical practice. Adjuncts such as image direction, microscopy, ultrasonic  
12 aspiration, awake/general anaesthesia surgery, cortical mapping/stimulation, and  
13 intra-operative MRI, will be used as considered appropriate by the consultant  
14 neurosurgeon.  
15

16  
17 It is recommended (but not mandated by this protocol) that a post-operative MRI  
18 scan is performed within 72 hours of surgery and used along with the surgeon's  
19 assessment to confirm complete resection or incomplete resection. A copy of this  
20 scan will be taken by the research team and uploaded to the scan database for the  
21 trial.  
22

## 23 **7.2 Stereotactic radiosurgery**

24  
25 Stereotactic radiosurgery will be performed at the National Centre for Stereotactic  
26 Radiosurgery in Sheffield or the Queen Square Radiosurgery Centre, which are the  
27 two referral centres in the UK that are commissioned to provide Gamma Knife  
28 stereotactic radiosurgery for cavernoma (29).  
29

30  
31 Standard clinical treatment protocols will be used which involve targeting the brain  
32 cavernoma, but not the surrounding haemosiderin ring. Treatment dosages will range  
33 from 12-16Gy depending on size, shape, definition and site of the cavernoma.  
34  
35

36  
37 If ICH has occurred from the cavernoma, Gamma Knife stereotactic radiosurgery will  
38 be carried out once the haematoma is judged to have been reabsorbed to minimise  
39 radiation exposure and reduce volume of treatment as much as possible.  
40  
41

# 42 **8 STUDY ASSESSMENTS**

## 43 **8.1 STUDY ASSESSMENTS**

44  
45 This section outlines the study assessments to be completed by the research team.  
46 The schedule of study assessments is provided on the following page.  
47  
48  
49  
50  
51  
52  
53  
54  
55  
56  
57  
58  
59  
60

8.1.1 Table of assessments

| Assessment                                                               | Identification and Screening | Baseline visit | Within 3 months of baseline | 6-month local in-person follow-up | 6-monthly central follow-up |
|--------------------------------------------------------------------------|------------------------------|----------------|-----------------------------|-----------------------------------|-----------------------------|
| Assessment of eligibility                                                | X                            |                |                             |                                   |                             |
| Screening end enrolment logs                                             | X                            |                |                             |                                   |                             |
| Consent to recruitment conversation recordings                           | X <sup>1</sup>               |                |                             |                                   |                             |
| Consent to qualitative interview                                         | X                            |                |                             |                                   |                             |
| Recording of patient recruitment conversations                           | X <sup>2</sup>               | X <sup>2</sup> |                             |                                   |                             |
| Consent to randomisation                                                 | X <sup>3</sup>               | X <sup>3</sup> |                             |                                   |                             |
| Demographic, clinical, socio-economic, medication, and radiographic data |                              | X              |                             |                                   |                             |
| DNA sample                                                               |                              | X              |                             |                                   |                             |
| Provision of diagnostic brain imaging                                    |                              | X              |                             |                                   |                             |
| Randomisation                                                            |                              | X              |                             |                                   |                             |
| Questionnaires                                                           |                              | X              |                             | X                                 | X                           |
| Cavernoma surgical management                                            |                              |                | X                           |                                   | X                           |
| Repeat brain MRI                                                         |                              |                |                             | X                                 |                             |
| Outcomes and adverse events                                              |                              |                |                             | X                                 | X                           |
| Qualitative interview                                                    |                              |                | X <sup>4</sup>              |                                   |                             |

1 – Research teams will be asked to capture verbal consent to audio-recordings of recruitment conversations when the approach is made to the participant. If this is not possible at this time, consent may be captured during subsequent recruitment conversations.

2 – Recordings of recruitment conversations with patients should be captured (as requested) wherever the CARE pilot trial is discussed (illustrated here but not restricted to Screening and Baseline Visit).

3 – Consent to participation in CARE may be collected at the Baseline Visit or in advance, during the Screening stage.

4 – Interviews with patients will take place within 3 months of being invited to take part in the trial.

### 8.1.2 Screening

Potential participant identification and screening should be carried out as per sections 5.1 and 5.2.

Approached patients who decline to take part will be given the opportunity to take part in an interview to discuss why they decided not to participate as per section 5.2.3.

Research teams should complete screening and enrolment logs as per section 5.3.

### 8.1.3 Informed consent

It is likely that consent to participate in the CARE pilot trial will be captured during a clinical consultation between the patient and a clinician who is also a member of the CARE pilot trial research team. The consenting procedures outlined in section 5.2. will be followed.

### 8.1.4 Baseline visit

Baseline visits may be conducted remotely or in person, depending on patient, carer or parent/guardian preference, and restrictions on working practices. These visits will be conducted by research team staff who are members of, or affiliated to, the clinical care team.

Research team staff will collect the following data at the baseline visit from all study participants: demographics, socioeconomic characteristics (e.g. employment, education, and carer needs), medical history (including details of the type of presentation of the symptomatic brain cavernoma and family history) and medications (including drug therapy).

The patient reported questionnaires that should be completed are EQ5D-5L for adults or EQ5D-3Y for children and Liverpool Seizure Severity Scale (LSSS).

The patient should be assessed by the research team member (assisted by parent/guardian where required) using the following scales:

1. Modified Rankin Scale (mRS) score
2. National Institute of Health Stroke Scale Score (adult or paediatric) (if examined in person)
3. Karnofsky Performance Status (KPS) scale in adults and Lansky Play-Performance Scale in children (LPS)

If the visit is done face to face, research team staff will collect a venous blood sample of up to 10mL from patients who consent into an EDTA tube for genetic analysis. Samples will be shipped immediately by first class post and in adherence with UN3373 guidelines to the central laboratory at the Edinburgh Clinical Research Facility.

The research team at each site is responsible for entering these data onto the study Electronic Case Report Form (eCRF). Once baseline data are complete, randomisation may proceed. After randomisation is performed, the PI and other research staff on the delegation log at the participant's site will be sent email

1  
2 confirmation or randomisation and treatment allocation, with a reminder about the  
3 subsequent scheduled activities in the trial.  
4  
5

6 Research teams will upload the relevant pseudo-anonymised DICOM images of the  
7 brain imaging (including diagnostic brain MRI) that confirmed the mode of  
8 presentation and diagnosis of the symptomatic cavernoma to the trial imaging  
9 database. Images may also be copied to CD and posted to the brain imaging  
10 management team for upload. These scans will be stored for subsequent validation  
11 by a senior neuroradiologist to confirm or refute eligibility.  
12  
13

#### 14 **8.1.5 Three-month adherence check**

15  
16  
17 The PI and research staff at a site where a participant was randomised will be sent  
18 an email prompt around three months after baseline to report whether surgical  
19 management was undertaken after randomisation, regardless of whether the  
20 participant was allocated to surgical management by randomisation. This will allow  
21 detection of cross-overs between the two arms of the trial.  
22

23 Adherence to the randomised allocation will be assessed by comparing treatment  
24 allocation with the completion of the surgical management case report form. Lack of  
25 adherence to the randomised treatment allocation will not be recorded as a protocol  
26 deviation or violation.  
27  
28

#### 29 **8.1.6 Six-month local follow-up visit**

30  
31  
32 Participants will be asked to attend for their first six-month follow-up visit in person in  
33 order to perform brain MRI (which will be permitted between 5-7 months after  
34 randomisation) to assess cavernoma presence and size as a measure of the efficacy  
35 of surgical management. These images should be uploaded to the trial imaging  
36 database or research teams may post CDs to the MRI management team for upload.  
37 The radiology department at each site will issue the clinical report of any brain MRI  
38 performed for the CARE pilot trial. A copy of MRI brain scans performed before or  
39 after surgical management (if performed) will be taken by the research team and  
40 uploaded to the scan database for the trial. A copy of the MRI performed on the day  
41 of treatment for patients undergoing stereotactic radiosurgery will be taken by the  
42 research team and uploaded to the database for the trial (or copied to CD and posted  
43 to the MRI management team for upload).  
44

45 Research teams will record details of any clinical outcome events that have occurred  
46 since randomisation, whether surgical management was used, including specific  
47 operative techniques or methods of stereotactic radiosurgery. Although surgical  
48 management in the CARE pilot trial will continue to be neurosurgical excision or  
49 stereotactic radiosurgery, we will collect details of each type of surgical management  
50 used after randomisation to allow us to quantify the use of emerging technologies,  
51 such as minimally invasive therapeutic approaches for brain cavernoma such as  
52 magnetic resonance thermography-guided laser interstitial thermal therapy, or  
53 stereotactic laser ablation (41).  
54  
55

56 Imaging studies performed because of the occurrence of an outcome event will be  
57 collected by the research team and uploaded to the scan database for the trial.  
58  
59  
60



The patient reported questionnaires that should be completed are EQ5D-5L for adults or EQ5D-3Y for children and Liverpool Seizure Severity Scale (LSSS).

The patient should be assessed by the research team member (assisted by parent/guardian where required) using the following scales:

1. Modified Rankin Scale (mRS) score
2. National Institute of Health Stroke Scale Score (adult or paediatric) (if examined in person)
3. Karnofsky Performance Status (KPS) scale in adults and Lansky Play-Performance Scale in children (LPS)

If a blood sample for genetic analysis was not collected as the Baseline Visit, research team staff will collect a venous blood sample of up to 10mL from patients who consent into an EDTA tube. The sample will be shipped immediately by first class post and in adherence with UN3373 guidelines to the central laboratory at the Edinburgh Clinical Research Facility.

### 8.1.7 Six-monthly central follow-up visit

Thereafter, staff at the TCC, will perform six-monthly follow-up (+/- one month) by post in all patients who do not withdraw from follow-up in the CARE pilot trial, after checking the participant's vital status with their general practitioner. If a response is not received by the TCC within a fortnight, a research team member (based within ECTU) will contact non-responders and follow-up data by telephone or email.

Follow-up questionnaires will confirm participants' current domicile and general practitioner, and ask about disability, health-related quality of life, the occurrence of primary or secondary clinical outcomes, serious adverse events, and the occurrence of surgical management of the brain cavernoma (as described above). These questionnaires will also ask for information about relevant concomitant medications, such as anti-epileptic drugs. We will also record the use of drugs like propranolol, antiplatelet agents, anticoagulant agents and statins, which may have disease-modifying effects (49).

The patient reported questionnaires that should be completed are EQ5D-5L for adults or EQ5D-3Y for children and Liverpool Seizure Severity Scale (LSSS).

The patient should be assessed by the research team member (assisted by parent/guardian where required) using the following scales:

1. Modified Rankin Scale (mRS) score
2. Karnofsky Performance Status (KPS) scale in adults and Lansky Play-Performance Scale in children

### 8.1.8 Patient Interviews

In-depth interviews will be conducted by the qualitative researcher with a sample of eligible patients who have been approached to take part in the trial (including those accepting or declining participation) (see section 9.4). Purposive sampling will be used to identify patients who have declined participation from a variety of study sites, to gain insight into study-wide and site-specific reasons patients may have for declining. Purposive sampling of patients accepting participation in the CARE pilot trial will also be considered if findings from analysis of recorded recruitment conversations indicates this will be helpful. Interviews will take place within three months of the decision about trial participation (see 8.1.1).

## 8.2 LONG TERM FOLLOW UP

We will ask study participants to consent to long-term follow up (i.e. beyond the planned follow-up in the CARE pilot trial), including the use of routinely collected data (such as hospital admissions, procedures, and death certificates), in case the CARE pilot trial is successful and runs seamlessly into a definitive main phase trial.

## 8.3 BRAIN MAGNETIC RESONANCE IMAGING

Participants who consent to be randomised should undergo repeat brain MRI once at six months ( $\pm$  one month) after randomisation.

Brain MRI is usually undertaken after surgical management in clinical practice, but not always during medical management. If a participant undergoes brain MRI with the required sequences as part of their routine clinical care before the 6-month local follow up visit, the research team will request the brain MRI and upload the scan to the trial imaging database. Otherwise, repeat brain MRI should be performed six months after randomisation ( $\pm$  one month), regardless of treatment allocation, treatment received, and timing of treatment, for research purposes.

As a minimum standard, T1-weighted, T2-weighted, and haem-sensitive sequences (gradient recalled echo or susceptibility weighted imaging) will be required within standard sequence parameters and with an acceptable slice thickness and voxel size. We will collect any other sequences performed (e.g. Fluid Attenuated Inversion Recovery (FLAIR) post-contrast, T1 or FLAIR, and Diffusion-Weighted Imaging [DWI] sequences) to ascertain the frequency of their use for follow-up of brain cavernoma in everyday clinical practice.

## 8.4 OUTCOME EVENT ADJUDICATION

Clinical outcomes including death and stroke-like events will be adjudicated by a member of the TMG using all available source data (with patient identifiers and any information about cavernoma treatment redacted by the research team before upload to trial database) including clinical correspondence, brain imaging reports, and death certificate. Brain imaging performed during follow-up will be reviewed by a consultant neuroradiologist. Outcome assessors will aim to remain blinded to the brain cavernoma treatment policy that was allocated at randomisation, and if possible any medical and surgical management of the brain cavernoma received. If blinding could not be maintained, this will be documented.

## 8.5 DNA SAMPLE STORAGE AND ANALYSIS

A venous blood sample of up to 10mL will be collected into an EDTA tube for genetic analysis. Samples will be shipped immediately by first class post and in adherence with UN3373 guidelines to the central laboratory at the Edinburgh Clinical Research Facility for DNA extraction and future analysis. This sample will be stored for subsequent investigation of genetic modifiers of treatment effect, which are currently unknown (1). The relevant approvals will be sought for future research involving these samples.

## 9 DATA COLLECTION

Data items to be collected are described in section 8. This section describes the methods of data collection.

### 9.1 SOURCE DATA DOCUMENTATION

Source documents are those in which information is recorded and documented for the first time. The location of source data collected from the CARE pilot trial participants is detailed in the CARE pilot trial Source Data Plan. Investigators will be required to retain paper copies of completed ICFs. Otherwise, clinical data will be entered directly into the eCRF by the research team and TCC staff based on information in the medical records, which will be regarded as source data.

### 9.2 CASE REPORT FORMS

Documents reflecting the data required at each study assessment will be made available to research teams, to support entry into the study database of: Screening Log, Consent to Contact form, Consent and Status Log, Baseline Visit CRF, 6-Month Follow-up CRF, Serious Adverse Events Log and Change of Status form. Site research teams will be responsible for transcribing these data into the database. Data will be transcribed by those staff delegated to do so on the delegation log held at site.

### 9.3 STUDY DATABASE

The study database will be created and maintained by ECTU. This database will be compliant with the relevant regulations and Sponsor Standard Operating Procedures (SOPs). Trained and delegated members of the research team will be given password-protected logins to the database. The data will be stored in a secure server in the University of Edinburgh.

### 9.4 QRI DATA COLLECTION

#### 9.4.1 Screening log data

Screening logs will collect de-identified data on patients screened, identified as eligible, approached and accepting randomisation into the CARE pilot trial (see section 5.4) and identify points in the pathway where patients may be 'lost' to recruitment. Findings will guide data collection using the qualitative methods outlined below.

#### 9.4.2 Recordings of recruitment conversations

Patients will be invited to consent to the recording of all conversations during which participation in the CARE pilot trial is discussed. These conversations provide insight into both how the study is presented to patients and how patients interpret that

1  
2 information. Analysis of these conversations can reveal misunderstandings about  
3 that trial that can then be addressed in recruiter training.  
4  
5

### 6 **9.4.3 Patient and staff interviews**

7

8  
9 A sample of eligible patients who have been approached to take part in the trial  
10 (including those accepting and declining participation) will be invited to take part in an  
11 in-depth interview with the qualitative researcher based at the University of Bristol.  
12 This interview will take place within three months of being invited to take part in the  
13 trial.  
14

15 Interviews with patients will explore views on the presentation of trial information,  
16 understanding of study processes (e.g. randomisation), and reasons underlying  
17 decisions to consent or decline to participate in the CARE pilot trial. Numbers of  
18 interviews will be guided by the concept of 'data saturation' with final sample size (up  
19 to a maximum of 20 interviews) determined by the point at which three new  
20 interviews fail to shed insights.  
21

22 Staff involved in the trial will also be invited to take part in an in-depth interview.  
23 Interviews with health professionals will use purposeful sampling. Interviews with  
24 staff will include members of the trial TMG, including the CI, and those closely  
25 involved in the design, management leadership and coordination of the trial  
26 (approximately n=4-8); clinicians or researchers involved in trial recruitment  
27 (approximately n=12-20).  
28

29 Interviews with TMG members and investigators at sites will investigate their  
30 perspectives on the CARE pilot trial and experiences of recruitment (where relevant).  
31 Key topics explored will include views about the study design and protocol;  
32 understandings of the evidence on which the study is based; perceptions of  
33 uncertainty/equipoise in relation to the intervention arms; views about how the  
34 arms/protocol are delivered in clinical centres; methods for identifying eligible  
35 patients; views on eligibility, and examples of actual recruitment successes and  
36 difficulties.  
37  
38

39 Interviews will take place at a mutually convenient time by telephone or video-  
40 conferencing and will be recorded using University of Bristol approved methods for  
41 data capture and storage (this may include MS Teams and Zoom, depending on  
42 current policies).  
43  
44

### 45 **9.4.4 Meetings**

46

47 A QuinteT researcher will observe all TMG and TSC meetings during which the study  
48 protocol is developed and finalised, with a focus on discussions and final  
49 presentation of equipoise and eligibility criteria.  
50  
51

### 52 **9.4.5 Trial documentation**

53

54  
55 The QRI team will continue to review the wording of patient information leaflets (PIL)  
56 and consent forms in line with any feedback from the above that indicates content  
57 that is unclear or potentially open to misinterpretation.  
58  
59  
60

## 10 DATA MANAGEMENT AND TRANSFER

### 10.1 PERSONAL DATA

The following personal data will be collected as part of this research: contact details (including home address, telephone numbers, email address, date of birth and contact information for relatives/carers), demographic information (including age and sex), socioeconomic information, medical history (including prior symptoms from brain cavernoma, major co-morbidities, medication history, family history), and unique healthcare identifier (such as the Community Health Index [CHI] in Scotland, NHS Number, or equivalent in other nations). Unique healthcare identifiers will be collected to enable long term patient follow-up and ensure correct identification of patients when contacting GPs or sites for follow-up.

Personal data will be processed by site research teams, the TCC at the University of Edinburgh and qualitative research staff at the University of Bristol:

- Personal data will be stored at site by research teams on NHS computers (desktop and laptop). Computers will be password protected and kept in locked offices. All paper files containing personal data will be held in filing cabinets in NHS offices that will be locked when unattended. Study documentation will be accessed by the study team only.
- Personal data will also be entered into the secure trial database which will be hosted on a University of Edinburgh server and will be accessed by the TCC to perform 6-monthly follow-up with patients and long term follow up via record linkage.
- Contact information will be accessed by/passed to the qualitative researcher based at University of Bristol to contact patients for interview.
- Screening log data will be accessed by the qualitative researcher based at University of Bristol as part of the research.

Additional information on personal data in relation to the qualitative aspect of the trial is included in section 10.3.

### 10.2 BRAIN MRI SCANS

Diagnostic brain imaging will be managed by the Systematic Management, Archiving & Reviewing of Trial Images Service (SMARTIS) at the University of Edinburgh. We will establish a scan database (housekeeping system) using established models, to track all scan episodes, completeness and assessments; this will interface with the trial database. De-identified brain MRI scans will be uploaded to this database by research teams or by SMARTIS staff if CDs are posted to them. Scan collection, quality assurance, curation, and backup will be conducted by SMARTIS staff at the Brain Research Imaging Centre (BRIC), University of Edinburgh. Prof Phil White, or another neuroradiologist involved in the trial, will review the diagnostic and follow-up brain MR imaging using standardised review proforma derived from pre-existing validated work (Scottish Audit of Intracranial Vascular Malformations - SAIVMs).

### 10.3 QUINTET RECRUITMENT INTERVENTION

#### 10.3.1 Recordings of recruitment conversations

1  
2 Recruitment conversations will be recorded by a research team member using a  
3 method of secure data capture and storage in line with University of Bristol  
4 procedures (as outlined on the University of Bristol website). Audio-recordings will be  
5 transferred by secure data transfer by the approved qualitative research team  
6 members onto a secure drive at the University of Bristol for long-term storage and  
7 analysis. Audio-recordings will be labelled with the participant identification number;  
8 identifiable patient details will not be used.  
9

10 Audio-recordings will be subject to targeted transcription and edited to protect the  
11 anonymity of respondent. Transcription will be undertaken by an approved  
12 transcription service/transcriber that has signed the necessary confidentiality  
13 agreements with the University of Bristol. Data will be managed using NVivo software  
14 and stored on encrypted drives at the University of Bristol, in line with the university's  
15 data storage policies and in line with GDPR legislation.  
16

17  
18 At the end of the study, audio-recordings will be kept for at least 10 years before they  
19 will be destroyed. Transcripts will be stored indefinitely in secure research data  
20 storage designated 'controlled access', so can only be accessed by approved  
21 individuals who are interested in conducting their own analyses of the data. These  
22 individuals will have to submit an application to do this, which will be assessed by an  
23 independent committee. However, all data will have identifiable information removed  
24 before they are made available, and there will be no way to identify any individuals  
25 mentioned in interviews/appointments.  
26

### 27 28 **10.3.2 Interviews**

29  
30 Approved qualitative research team members from University of Bristol will access  
31 participants' contact details via the trial database or be securely passed them by the  
32 research team for the purposes of contacting patients who have consented to  
33 interviews as part of the QRI. Team members will be provided with an individual user  
34 account for the database with restricted, password-controlled access.  
35

36  
37 Interviews with patients and staff will be recorded directly by the qualitative  
38 researcher using processes for secure data capture and storage in line with  
39 University of Bristol procedures (as outlined on the University of Bristol website).  
40 Recordings will be held on a secure drive with restricted access at the University of  
41 Bristol for long-term storage and analysis. Recordings will be labelled with the  
42 participant identification number; identifiable patient details will not be used. At the  
43 end of the trial, recordings will be held for a minimum of 10 years after which they will  
44 be destroyed.  
45

46 Data from the QRI will be shared at the end of the trial as outlined in section 17.3.  
47

### 48 49 **10.3.3 QRI documentation**

50  
51 Paper or electronic documentation which is generated through the process of  
52 performing the QRI will be stored securely at the University of Bristol with access  
53 restricted only to approved personnel.  
54  
55  
56  
57

## 58 **10.4 DATA CONTROLLER**

59  
60 The University of Edinburgh and NHS Lothian are joint data controllers.

## 10.5 DATA BREACHES

Any data breaches will be reported to the University of Edinburgh and NHS Lothian Data Protection Officers who will onward report to the relevant authority according to the appropriate timelines if required.

# 11 STATISTICS AND DATA ANALYSIS

## 11.1 SAMPLE SIZE CALCULATION

Symptomatic brain cavernoma incidence data indicate that ~240 people would be newly-diagnosed during 18 months of recruitment (4). We aim for all of these patients to be screened, but if 10% are missed and 10% decline to participate, we expect research teams to identify ~190 patients. In the ARUBA trial, 226/726 (31%) of the eligible patients approached were randomised (30), so we expect ~60 patients with symptomatic brain cavernoma to be randomised in the CARE pilot trial.

## 11.2 PROPOSED STATISTICAL ANALYSES

In this pilot phase, analyses are descriptive only, and there will be no formal statistical tests.

We will quantify the number and proportions (with 95% confidence intervals to reflect their precision) of patients who are screened, eligible, approached, consent and are randomised. We will construct a CONSORT diagram to summarise the distribution and progress of participants in the trial including the numbers of withdrawals (50).

We will report descriptively the following: the number and the proportion of the collaborating sites that take part and recruit participants to the CARE pilot trial; research teams' implementation of trial procedures measured by number and type of protocol deviation; the numbers of participants allocated to neurosurgery and stereotactic radiosurgery; adherence to the allocated intervention; completeness of follow-up that would be due at each 6-month interval; completeness of baseline, imaging and outcome data; the frequency of outcome events overall and in an intention-to-treat analysis keeping patients in the treatment group to which they were allocated during all available follow-up.

We will also compare descriptively the characteristics of eligible patients who are screened and do not participate in the CARE pilot trial to eligible patients who are randomised using the characteristics recorded on the screening logs to assess generalisability (external validity) and any recruitment bias.

We will assess measures of functional outcome, to assess which has suitable statistical properties for use in a main phase trial (such as lack of floor/ceiling effects). We will assess whether such a measure (like the method we have used before (9)) would be more suitable as a primary outcome in place of intracranial haemorrhage.

## 11.3 QUINTET RECRUITMENT INTERVENTION DATA ANALYSIS

### 11.3.1 Screening and enrolment logs

The QuinteT researcher will analyse data using the SEAR framework to observe differences between sites in recruitment patterns as new sites open (51). Simple descriptive analyses will identify points in the recruitment pathway at which patients are lost to recruitment to the cohort or trials and the reasons why. Detailed eligibility and recruitment pathways will be compiled for sites, noting the point at which patients receive information about the study, which members of the clinical team they meet, and the timing and frequency of appointments. Recruitment pathways will be compared with details specified in the trial protocol and pathways from other sites to identify practices that are potentially more/less efficient. Numbers of eligible and recruited patients will be compared across sites and considered in relation to estimates specified in the grant application/study protocol. These data will be triangulated with qualitative findings (see below) to identify barriers and potential solutions to recruitment.

### 11.3.2 Recordings of recruitment conversations and interviews

Audio recordings of recruitment conversations will be sought from a purposefully sampled range of recruiting sites (showing higher and lower recruitment) to ensure maximum variation and recordings will be analysed by the QuinteT researcher. The audio recordings will be used to explore information provision, management of patient treatment preferences, and randomisation decisions to identify recruitment difficulties and improve information provision. Audio-recorded recruitment consultations will be subjected to targeted transcription with relevant sections first identified then transcribed and identifying data removed before fuller analysis. Analysis will employ content, thematic, and novel analytical approaches, including targeted conversation analysis (52) and quanti-qual appointment timing (the 'Q-Qat method') (53), as described in the QuinteT recruitment intervention protocol [24]. Interview data will be analysed thematically using constant comparative approaches derived from Grounded Theory methodology (54).

Findings from the investigation of recruitment to the CARE trials will be fed back to the CI, TMG, and collaborator Bauld, where appropriate, to determine a plan of actions to optimise recruitment to the pilot trials. Actions may include feedback to individuals or in groups as appropriate and will include template patient pathways, individualised or generic 'tips' sheets for recruiters and delivery of recruiter training. Group feedback and training will be timed to coincide with the meetings of professional associations mentioned above.

## 12 HEALTH ECONOMICS AND DATA ANALYSIS

We will collect self-reported health service use and social/economic outcomes using bespoke question sets that will inform future economic analyses (9; 10). If data collection is confirmed as feasible, then a previously developed decision model (20) will be updated and further developed to incorporate data collected within this study to provide a putative estimate of cost-effectiveness and its drivers. In the context of the CARE pilot trial, the health economics objectives are to: (i) design and test an optimal mechanism for the capture of resource use and cost data in community NHS



1  
2 settings, NHS secondary care, participants' out of pocket expenses and carer costs,  
3 (ii) estimate expected effect size and variance of relevant outcomes including health-  
4 related utility and quality-adjusted life years, and (iii) identify and measure the  
5 potential cost implications of surgical management of cavernomas. We will measure  
6 health-related utility (55), healthcare-related resource use and costs using participant  
7 questionnaires before randomisation and at each follow-up timepoint (56). These  
8 costs will be ratified by the study team through scrutiny of the patient pathway in both  
9 arms of the trials using available medical records to populate CRFs. We will assign  
10 unit costs using standard national costing sources where available, or through  
11 consultation with relevant service business managers. Costs will be summarised  
12 from the perspectives of (a) the NHS and personal social services, and (b) wider  
13 society (including participants' and their carers' out-of-pocket costs and lost  
14 productivity).  
15

## 16 17 18 19 **13 ADVERSE EVENTS**

20  
21  
22 The PI is responsible for the detection and documentation of events meeting the  
23 criteria and definitions detailed below. This task may also be carried out by another  
24 suitably qualified clinician in the research team at that site who has been delegated  
25 this role. Only clinical outcomes and relevant serious adverse events (SAE) related to  
26 medical and surgical management that occur after randomisation until the final 6-  
27 month follow-up review must be recorded in the eCRF. Participants will be instructed  
28 to contact their local research team if any symptoms develop at any time after being  
29 randomised.  
30

### 31 32 **13.1 DEFINITIONS**

33  
34 An **adverse event** (AE) is any untoward medical occurrence in a clinical trial  
35 participant which does not necessarily have a causal relationship with an  
36 investigational medicinal product (IMP).  
37

38  
39 An **adverse reaction** (AR) is any untoward and unintended response to an IMP  
40 which is related to any dose administered to that participant.  
41

42 A **serious adverse event** (SAE), **serious adverse reaction** (SAR). Any AE or AR  
43 that at any dose:  
44

- 45 • results in death of the clinical trial participant;
- 46 • is life threatening\*;
- 47 • requires in-patient hospitalisation<sup>^</sup> or prolongation of existing hospitalisation;
- 48 • results in persistent or significant disability or incapacity;
- 49 • consists of a congenital anomaly or birth defect;
- 50 • results in any other significant medical event not meeting the criteria above.

51  
52  
53 \*Life-threatening in the definition of an SAE or SAR refers to an event where the  
54 participant was at risk of death at the time of the event. It does not refer to an event  
55 which hypothetically might have caused death if it were more severe.  
56

57  
58 <sup>^</sup>Any hospitalisation that was planned prior to enrolment will not meet SAE criteria.  
59 Any hospitalisation that is planned post enrolment will meet the SAE criteria.  
60

## 13.2 IDENTIFYING SAEs

Participants will be asked about the occurrence of SAEs wherever contact is made with them between randomisation and the final central six monthly follow up review. Open-ended and non-leading verbal questioning of the participant will be used to enquire about SAE occurrence. Only events which are clinical outcomes on the trial or are related to medical and surgical management will be recorded as AEs and SAEs. Participants will also be asked if they have been admitted to hospital, used any new medicines or changed concomitant medication regimens. If there is any doubt as to whether a clinical observation is an SAE, the event will be recorded. SAEs might also be identified via information from support departments e.g. laboratories.

## 13.3 RECORDING SAEs

When an SAE occurs, it is the responsibility of the PI, or another suitably qualified clinician in the study team who is delegated to record and report SAEs, to review all documentation (e.g. hospital notes, laboratory and diagnostic reports) related to the event. It is the PIs responsibility, or another suitably qualified clinician that has been delegated this role, to assess whether an AE is an outcome in the trial. The PI or delegated research team member will then record all relevant information in the CRF/AE log and on the SAE form (if the AE meets the criteria of serious). If the AE is detected by central means of follow-up, the TCC will initiate the collection of this information but enlist the help of local site research staff to acquire the relevant clinical and imaging information. Information to be collected includes type of event, onset date, clinical assessment of severity and causality, date of resolution as well as treatment required, investigations needed and outcome.

### 13.3.1 Pre-existing medical conditions

Pre-existing medical conditions (i.e. existed prior to informed consent) should be recorded as medical history and only recorded as SAEs if medically judged to have worsened during the trial and meet the definition of an SAE.

### 13.3.2 Worsening of the underlying condition during the trial

Medical occurrences or symptoms of deterioration that are expected to be due to the participant's underlying condition should be recorded in the participant's medical notes and only be recorded as SAEs if medically judged to have unexpectedly worsened during the trial. Events that are consistent with the expected progression of the underlying disease should not be recorded as SAEs.

## 13.4 ASSESSMENT OF AEs AND SAEs

Each AE which may be a clinical outcome for the trial or may be related to surgical management must be assessed for seriousness, causality, severity and ARs must be assessed for expectedness by the PI or another suitably qualified clinician in the study team who has been delegated this role.

The CI may not downgrade an event that has been assessed by an Investigator as an SAE or a related and unexpected SAE, but can upgrade an AE to an SAE, SAR or SUSAR if appropriate.

#### 13.4.1 Assessment of Seriousness

The Investigator will make an assessment of seriousness as defined in Section 13.1.

#### 13.4.2 Assessment of Causality

The Investigator will make an assessment of whether the AE/SAE is likely to be related to the study intervention according to the definitions below.

**Unrelated:** where an event is not considered to be related to the treatment allocated at randomisation.

**Possibly Related:** The nature of the event, the underlying medical condition, concomitant medication or temporal relationship make it possible that the AE has a causal relationship to the treatment allocated at randomisation.

#### 13.4.3 Assessment of Expectedness

If the AE is judged to be related to the study interventions, the Investigator will make an assessment of expectedness.

**Expected:** The type of event is expected in line with the treatment allocated at randomisation.

**Unexpected:** The type of event was not listed in the protocol or is not an expected clinical occurrence.

#### 13.4.4 Assessment of Severity

The Investigator will make an assessment of severity for each AE/SAE and record this on the CRF or SAE form according to one of the following categories:

**Mild:** an event that is easily tolerated by the participant, causing minimal discomfort and not interfering with every day activities.

**Moderate:** an event that is sufficiently discomforting to interfere with normal everyday activities.

**Severe:** an event that prevents normal everyday activities.

Note: the term 'severe', used to describe the intensity, should not be confused with 'serious' which is a regulatory definition based on participant/event outcome or action criteria. For example, a headache may be severe but not serious, while a minor stroke is serious but may not be severe.

## 13.5 REPORTING OF SAEs

Once the Investigator becomes aware that an SAE has occurred in a study participant, the information will be reported to the ACCORD (Academic and Clinical Central office for Research and Development) Research Governance & Quality Assurance (QA) Office **immediately or within 24 hours**. If the Investigator does not have all information regarding an SAE, they should not wait for this additional information before notifying ACCORD. The SAE report form can be updated when the additional information is received.

The SAE form will be emailed to ACCORD via [Safety@accord.scot](mailto:Safety@accord.scot). Only forms in a PDF format will be accepted by ACCORD via email.

The Investigator will follow up each event until resolution. Where missing information has not been sent to ACCORD after an initial report, ACCORD will contact the investigator and request the missing information.

All reports faxed to ACCORD and any follow up information will be retained by the Investigator in the Investigator Site File (ISF).

The sponsor is responsible for reporting SAEs that are considered to be “possibly related” to the treatment allocation and “unexpected”, to the REC within 15 days of becoming aware of the event.

The TCC will provide SAE line listings from ACCORD for circulation prior to DMC meetings.

## 14 PREGNANCY

Although pregnancy is not considered an AE or SAE; as a matter of safety, the Investigator will be required to record any female participant’s pregnancy which occurs while participating in the study. The Investigator will need to record the information on a Pregnancy Notification Form and submit this to the ACCORD office within 14 days of being made aware of the pregnancy. All pregnant female participants will be followed up until the outcome of the pregnancy.

## 15 OVERSIGHT ARRANGEMENTS

### 15.1 TRIAL MANAGEMENT GROUP

The trial will be coordinated by a TMG, consisting of the CI, grant holders, Trial Manager and PAG members. The roles and responsibilities of the TMG and the names of committee members are detailed in the TMG charter.

The Trial Manager will coordinate and oversee the trial and will be accountable to the CI. The Data Manager will be responsible for checking the CRFs for completeness, plausibility and consistency. Any queries will be resolved by the Investigator or delegated member of the site team.

### 15.2 TRIAL STEERING COMMITTEE

1  
2 A Trial Steering Committee (TSC) will be established to oversee the conduct and  
3 progress of the trial. The terms of reference of the TSC, reporting arrangements and  
4 the names of committee members are detailed in the TSC charter.  
5  
6

### 7 **15.3 DATA MONITORING COMMITTEE**

9 An independent Data Monitoring Committee (DMC) will be established to oversee the  
10 safety of participants in the trial. The terms of reference of the Data Monitoring  
11 Committee and the names of committee members are detailed in the DMC charter.  
12 The DMC Charter will be signed by the appropriate individuals before recruitment to  
13 the trial starts.  
14  
15

### 16 **15.4 PATIENT ADVISORY GROUP**

17 The patient advocacy organisation CAUK will organise input from a diverse Patient  
18 Advisory Group which will aim to meet bi-monthly. Two representatives of this PAG  
19 will join the TSC. The terms of reference of the Patient Advisory Group and the  
20 names of committee members are detailed in the PAG Terms of Reference.  
21  
22  
23  
24

### 25 **15.5 INSPECTION OF RECORDS**

26 Investigators and institutions involved in the study will permit trial related monitoring  
27 and audits on behalf of the sponsor, REC review, and regulatory inspection(s). In the  
28 event of audit or monitoring, the Investigator agrees to allow the representatives of  
29 the sponsor direct access to all study records and source documentation. In the  
30 event of regulatory inspection, the Investigator agrees to allow inspectors direct  
31 access to all study records and source documentation.  
32  
33  
34  
35

### 36 **15.6 STUDY MONITORING AND AUDIT**

37 The ACCORD Sponsor Representative will assess the study to determine if an  
38 independent risk assessment is required. If required, the independent risk  
39 assessment will be carried out by the ACCORD Quality Assurance Group to  
40 determine if an audit should be performed before/during/after the study and, if so, at  
41 what frequency.  
42  
43  
44

45 Risk assessment, if required, will determine if audit by the ACCORD QA group is  
46 required. Should audit be required, details will be captured in an audit plan. Audit of  
47 Investigator sites, study management activities and study collaborative units, facilities  
48 and 3<sup>rd</sup> parties may be performed.  
49  
50  
51

## 52 **16 GOOD CLINICAL PRACTICE**

### 53 **16.1 ETHICAL CONDUCT**

54 The study will be conducted in accordance with the principles of the International  
55 Conference on Harmonisation Tripartite Guideline for Good Clinical Practice (ICH  
56 GCP). Before the study can commence, all required approvals will be obtained and  
57 any conditions of approvals will be met.  
58  
59  
60

## 16.2 INVESTIGATOR RESPONSIBILITIES

The PI is responsible for the overall conduct of the study at the site and compliance with the protocol and any protocol amendments. In accordance with the principles of ICH GCP, the following areas listed in this section are also the responsibility of the PI. Responsibilities may be delegated to an appropriate member of study site staff. A Delegation Log will be prepared for each site, detailing the responsibilities of each member of staff working on the trial.

### 16.2.1 Informed Consent

The PI is responsible for ensuring informed consent is obtained before any protocol specific procedures are carried out. The decision of a participant to participate in clinical research is voluntary and should be based on a clear understanding of what is involved.

Participants must receive adequate oral and written information – appropriate PILs and ICFs will be provided. The oral explanation to the participant will be performed by the PI or qualified delegated person, and must cover all the elements specified in the PIL and ICF. The participant must be given every opportunity to clarify any points they do not understand and, if necessary, ask for more information. The participant must be given sufficient time to consider the information provided. It should be emphasised that the participant may withdraw their consent to participate at any time without loss of benefits to which they otherwise would be entitled. The participant will be informed and agree to their medical records being inspected by regulatory authorities and representatives of the sponsor(s).

The PI or delegated member of the research team and the participant will sign and date the ICF(s) to confirm that consent has been obtained. The participant will receive a copy of this document and a copy filed in the Investigator Site File (ISF) and participant's medical notes (if applicable).

### 16.2.2 Study Site Staff

The PI and research team must be familiar with the protocol and the study requirements. It is the PI's responsibility to ensure that all staff assisting with the study are adequately informed about the protocol and their trial related duties.

### 16.2.3 Data Recording

The PI is responsible for the quality of the data recorded in the CRF at each Investigator Site.

### 16.2.4 Investigator Documentation

The PI will ensure that the required documentation is available in local Investigator Site files.

### 16.2.5 Training

### 16.2.5.1 Recruitment site training

Research teams will be trained on the trial protocol, sponsor SOPs and QRI processes by the trial team and qualitative researcher (in person or remotely). This will be completed before the site is permitted to open to recruitment.

QRI training of PIs and recruiters will take place as needed and as indicated by QRI findings as described in 3.1.1.2 above. Findings from data collected during the QRI will be presented to the CI and TMG and a plan of action formulated to improve recruitment and information provision. Generic challenges such as how to explain study processes (e.g. randomisation) may be addressed through dissemination of 'tips and guidance' documents. Supportive feedback will be a core component of the plan of action, with the exact nature and timing dependent on the issues that arise. Site-specific feedback may cover institutional barriers, while multi-centre group feedback sessions may address widespread challenges, that would benefit from discussion. All group feedback sessions will be aided by de-identified data extracts from interviews and recorded recruitment conversations. Individual confidential feedback will also be offered, particularly where recruiters experience specific difficulties or where there is a need to discuss potentially sensitive issues. Investigator meetings and site visits may also be employed to discuss technical or clinical challenges (e.g. discomfort surrounding eligibility criteria).

### 16.2.5.2 GCP training

For non-CTIMP (i.e. non-drug) studies all researchers are encouraged to undertake Good Clinical Practice (GCP) training in order to understand the principles of GCP. However, this is not a mandatory requirement unless deemed so by the sponsor. GCP training status for all research team members should be indicated in their respective CVs or a GCP certificate may be provided.

## 16.2.6 Confidentiality

All laboratory specimens, evaluation forms, reports, and other records must be identified in a manner designed to maintain participant confidentiality. All records must be kept in a secure storage area with limited access. The PI and research site staff involved with this study may not disclose or use for any purpose other than performance of the study, any data, record, or other unpublished information, which is confidential or identifiable, and has been disclosed to those individuals for the purpose of the study. Prior written agreement from the sponsor or its designee must be obtained for the disclosure of any said confidential information to parties not involved in the trial.

## 16.2.7 Data Protection

All PIs and research team staff (including central research team staff and qualitative research staff) involved with this study must comply with the requirements of the appropriate data protection legislation (including the General Data Protection Regulation and Data Protection Act) with regard to the collection, storage, processing and disclosure of personal information.

Computers used to collate the data will have limited access measures via user names and passwords.

Published results will not contain any personal data and be of a form where individuals are not identified and re-identification is not likely to take place.

## STUDY CONDUCT RESPONSIBILITIES

### 16.3 PROTOCOL AMENDMENTS

Any changes in research activity, except those necessary to remove an apparent, immediate hazard to the participant in the case of an urgent safety measure, must be reviewed and approved by the CI.

Amendments will be submitted to a sponsor representative for review and authorisation before being submitted in writing to the appropriate REC, and local R&D for approval prior to participants being enrolled into an amended protocol.

### 16.4 MANAGEMENT OF PROTOCOL NON-COMPLIANCE

Prospective protocol deviations, i.e. protocol waivers, will not be approved by the sponsors and therefore will not be implemented, except where necessary to eliminate an immediate hazard to study participants. If this necessitates a subsequent protocol amendment, this should be submitted to the REC, and local R&D for review and approval if appropriate.

Protocol deviations will be recorded in a protocol deviation log and logs will be submitted to the sponsors every 3 months. Each protocol violation will be reported to the sponsor within 3 days of becoming aware of the violation. All protocol deviation logs and violation forms should be emailed to [QA@accord.scot](mailto:QA@accord.scot)

Deviations and violations are non-compliance events discovered after the event has occurred. Deviation logs will be maintained for each site in multi-centre studies. An alternative frequency of deviation log submission to the sponsors may be agreed in writing with the sponsors.

The following will not be recorded as protocol deviations:

- Missed audio-recordings of conversations by research teams.
- Lack of adherence to the randomised treatment allocation.

### 16.5 SERIOUS BREACH REQUIREMENTS

A serious breach is a breach which is likely to effect to a significant degree: (a) the safety or physical or mental integrity of the participants of the trial; or(b) the scientific value of the trial.

If a potential serious breach is identified by the CI, a site PI or delegates, the co-sponsors must be notified via [seriousbreach@accord.scot](mailto:seriousbreach@accord.scot) within 24 hours. It is the



responsibility of the co-sponsors to assess the impact of the breach on the scientific value of the trial, to determine whether the incident constitutes a serious breach and report to REC as necessary.

## 16.6 STUDY RECORD RETENTION

All trial documentation will be kept for a minimum of three years from the protocol defined end of trial point. When the minimum retention period has elapsed, trial documentation will not be destroyed without permission from the sponsor.

QRI audio-recordings will be kept for at least 10 years before they will be destroyed and electronic transcripts will be stored indefinitely in secure research data storage.

## 16.7 END OF TRIAL

The end of study is defined as the last participant's last visit. This will be a 6-month follow up review.

The PIs or the co-sponsor(s) have the right at any time to terminate the study for clinical or administrative reasons.

The end of the study will be reported to the REC, and Research and Development Offices and co-sponsors within 90 days, or 15 days if the study is terminated prematurely. The PIs will inform participants if the study is closed prematurely and ensure that the appropriate follow up is arranged for all participants involved.

End of study notification will be reported to the co-sponsors via email to [resgov@accord.scot](mailto:resgov@accord.scot).

## 16.8 CONTINUATION OF TREATMENT FOLLOWING THE END OF STUDY

There are no provisions for ancillary or care for participants after the trial ends, because the interventions in the CARE pilot trial are provided in standard clinical practice and aftercare will occur as normal in standard practice.

## 16.9 INSURANCE AND INDEMNITY

The co-sponsors are responsible for ensuring proper provision has been made for insurance or indemnity to cover their liability and the liability of the CI and staff. The following arrangements are in place to fulfil the co-sponsors' responsibilities:

- The protocol has been designed by the CI, researchers employed by the University and the TMG. The University has insurance in place (which includes no-fault compensation) for negligent harm caused by poor protocol design by the CI and researchers employed by the University.
- Sites participating in the study will be liable for clinical negligence and other negligent harm to individuals taking part in the study and covered by the duty of care owed to them by the sites concerned. The co-sponsors require individual sites participating in the study to arrange for their own insurance or indemnity in respect of these liabilities.
- Sites which are part of the United Kingdom's National Health Service will have the benefit of NHS Indemnity.

- Sites outside the United Kingdom may be responsible for arranging their own indemnity or insurance for their participation in the study, and will be responsible for compliance with local law applicable to their participation in the study.

## **17 REPORTING, PUBLICATIONS AND NOTIFICATION OF RESULTS**

### **17.1 AUTHORSHIP POLICY AND REPORTING**

On completion of the study, the study data will be analysed and tabulated, and a clinical study report will be prepared in accordance with the International Conference on Harmonisation guidelines.

A final research report will be prepared as required by the funder. A summary report of the study will be provided to the REC within one year of the end of the study.

The success of the CARE pilot trial will be determined by the collaboration of a large number of doctors, nurses, other health professionals, patients, relatives, and the patient support organisation CAUK. For this reason, the credit for the main results will be given, not exclusively to the TMG, but to all collaborators with the trial. The primary trial publication will be drafted by a writing committee drawn from the TMG, whose membership has been approved by the TSC. Authorship will be under a group name for the CARE pilot trial collaboration and include the writing committee. People included on active sites' delegation logs will be included in any listing of collaborators in trial publications. The manuscript will be approved by the TSC before submission for publication.

### **17.2 PUBLICATION AND DISSEMINATION**

Publications will be managed in line with funder requirements. We will submit manuscripts to peer reviewed journals, describing the findings of the QuinteT recruitment intervention and the CARE pilot trial (in addition to the final report for publication in the HTA journal). We will pay for these papers to be published open access. We will also present our findings at meetings of the Association of British Neurologists, the Society of British Neurological Surgeons, the British Paediatric Neurosurgery Society, and the British Paediatric Neurology Association.

We will disseminate a plain English summary of the findings of the CARE pilot trial to participants and public audiences with input from, and acknowledgement of, the Patient Advisory Group. We will offer to present our project and its findings to the annual meetings of CAUK, which is a national event that gives people affected by cavernoma a voice to talk about the issues that matter to them. We will produce an easy access report of our findings to share with the public and patients, and we will post it in the public domain on the CAUK website. We will keep the public, patients, and carers informed about study progress and results via social media channels (Facebook and Twitter).

### **17.3 DATA SHARING**

Ownership of the data arising from this study resides with the study team.

1  
2 Following publication of the primary paper, a de-identified individual participant data  
3 set will be prepared for sharing purposes. All data requests should be submitted to  
4 the CI for consideration. Access to de-identified data may be granted following review  
5 by CI and TMG.  
6

7 Data collected during PAG discussions or in QuinteT recruitment intervention data  
8 collection with patients may include quotes that will be useful to CAUK in producing  
9 or optimising existing patient or carer information; where participant consent has  
10 been given, these data (after removing or disguising identifiers) will be made  
11 available by the QuinteT research group in Bristol to CAUK in order to maximise their  
12 impact.  
13

14 At the end of the study, QRI audio-recordings will be kept for at least 10 years before  
15 they will be destroyed. Transcripts will be stored indefinitely in secure research data  
16 storage, which can be accessed by approved individuals who are interested in  
17 conducting their own analyses of the data. These individuals will have to submit an  
18 application to do this, which will be assessed by an independent committee.  
19 However, all data will have identifiable information removed before they are made  
20 available, and there will be no way to identify individuals mentioned in  
21 interviews/appointments.  
22  
23  
24  
25  
26  
27  
28  
29  
30  
31  
32  
33  
34  
35  
36  
37  
38  
39  
40  
41  
42  
43  
44  
45  
46  
47  
48  
49  
50  
51  
52  
53  
54  
55  
56  
57  
58  
59  
60

# 18 TRIAL TIMELINE

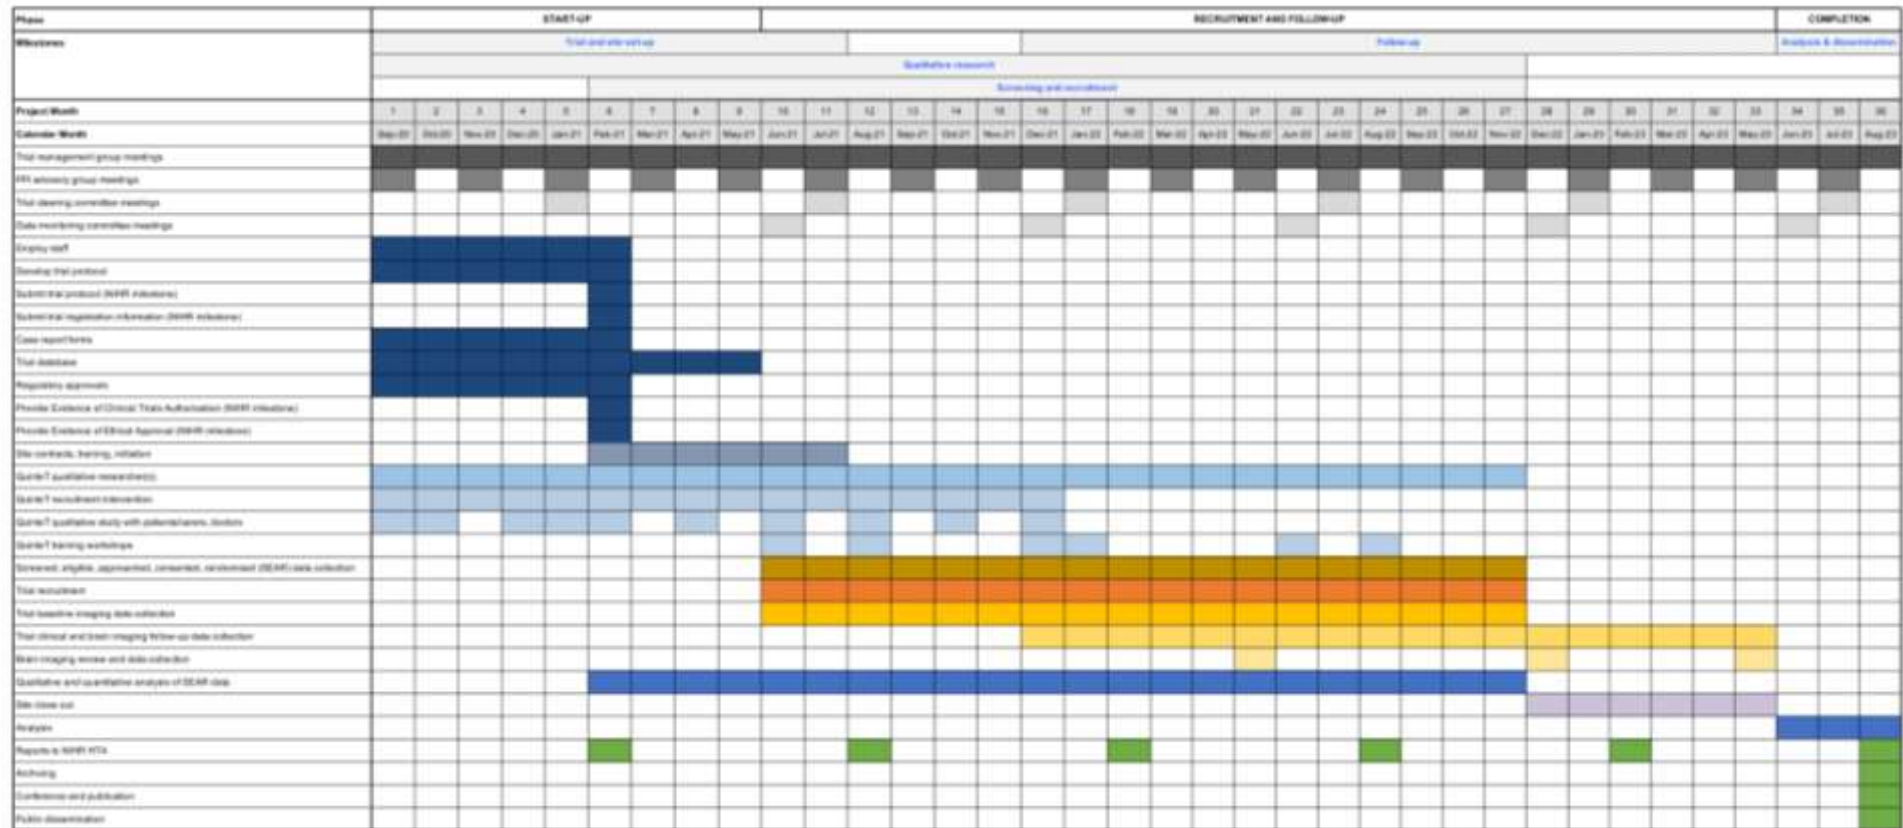

Footnote: Trial delivery timings are targets, variations will not be recorded as a protocol deviation/violation.

## 19 PROTOCOL VERSION CONTROL HISTORY

### 19.1 Version 1.0 (29Jan2021)

Original sponsor-approved version, submitted as part of application for REC review.

### 19.2 Version 2.0 (22Mar2021)

Protocol updated following REC meeting comments. Summary of changes:

- REC reference added to cover page table (page 1).
- Specific reference to Gamma Knife stereotactic radiosurgery added throughout and clarification added that neurosurgery and Gamma Knife stereotactic radiosurgery will be used according to their availability in clinical practice (section 3, 7 and throughout).
- Clarification added that imaging studies performed because of the occurrence of an outcome event will be collected by the research team and uploaded to the scan database for the trial (section 8.1.6)
- Trial timeline added (section 18).
- Version history table added (section 19).

## 20 REFERENCES

1. Labauge P, Denier C, Bergametti F, Tournier-Lasserre E. Genetics of cavernous angiomas. *Lancet Neurol*. 2007, Vol. 6, 3, pp. 237-244.
2. Morris Z, Whiteley WN, Longstreth WT, Jr., Weber F, Lee YC, Tsushima Y, et al. Incidental findings on brain magnetic resonance imaging: systematic review and meta-analysis. *BMJ*. 2009, Vol. 339, b3016.
3. Al-Shahi Salman R, Berg MJ, Morrison L, Awad IA, Angioma Alliance Scientific Advisory Board. Hemorrhage from cavernous malformations of the brain: definition and reporting standards. *Stroke*. 2008, Vol. 39, 12, pp. 3222-30.
4. Al-Shahi R, Bhattacharya JJ, Currie DG, Papanastassiou V, Ritchie V, Roberts RC, et al. Prospective, population-based detection of intracranial vascular malformations in adults: the Scottish Intracranial Vascular Malformation Study (SIVMS). *Stroke*. 2003, Vol. 34, 5, pp. 1163-1169.
5. Horne MA, Flemming KD, Su IC, Stapf C, Jeon JP, Li D, et al. Clinical course of untreated cerebral cavernous malformations: a meta-analysis of individual patient data. *Lancet Neurol*. 2016, Vol. 15, 2, pp. 166-173.
6. Josephson CB, Leach JP, Duncan R, Roberts RC, Counsell CE, Al-Shahi Salman R, et al. Seizure risk from cavernous or arteriovenous malformations: prospective population-based study. *Neurology*. 2011, Vol. 76, 8, pp. 1548-1554.
7. Miller CE, Quayyum Z, McNamee P, Al-Shahi Salman R, SIVMS Steering Committee. Economic burden of intracranial vascular malformations in adults: prospective population-based study. *Stroke*. 2009, Vol. 40, 6, pp. 1973-1979.
8. Samarasekera N, Poorthuis M, Kontoh K, Stuart I, Respingier C, Berg J, et al. Guidelines for the management of cerebral cavernous malformations in adults. . *Genetic Alliance UK & Cavernoma Alliance UK*. 2012.
9. Moultrie F, Horne MA, Josephson CB, Hall JM, Counsell CE, Bhattacharya JJ, et al. Outcome after surgical or conservative management of cerebral cavernous malformations. *Neurology*. 2014, Vol. 83, 7, pp. 582-589.
10. Bicalho VC, Bergmann A, Domingues F, Frossard JT, de Souza J. Cerebral Cavernous Malformations: Patient-Reported Outcome Validates Conservative Management. *Cerebrovasc Dis*. 2017, Vol. 44, 5-6, pp. 313-319.
11. Polster SP, Cao Y, Carroll T, Flemming K, Girard R, Hanley D, et al. Trial Readiness in Cavernous Angiomas With Symptomatic Hemorrhage (CASH). *Neurosurgery*. 2019, Vol. 84, 4, pp. 954-964.
12. Qiao N, Ma Z, Song J, Wang Y, Shou X, Zhang X, et al. A systematic review and meta-analysis of surgeries performed for treating deep-seated cerebral cavernous malformations. 2015, Vol. 29, 4, pp. 493-499.
13. Poorthuis M, Rinkel LA, Lammy S, Al-Shahi Salman R. Stereotactic radiosurgery for cerebral cavernous malformations: a systematic review and meta-analysis. *Neurology*. 2019, Vol. (in press).
14. Poorthuis M, Samarasekera N, Kontoh K, Stuart I, Cope B, Kitchen N, et al. Comparative studies of the diagnosis and treatment of cerebral cavernous malformations in adults: systematic review. . *Acta Neurochir (Wien)* . 2013, Vol. 155, 4, pp. 643-649.
15. Akers A, Al-Shahi Salman R, I AA, Dahlem K, Flemming K, Hart B, et al. Synopsis of Guidelines for the Clinical Management of Cerebral Cavernous Malformations: Consensus Recommendations Based on Systematic Literature Review by the Angioma Alliance Scientific Advisory Board Clinical Experts Panel. *Neurosurgery*. 2017, Vol. 80, 5, pp. 665-680.
16. Rooshenas L, Paramasivan S, Jepson M, Donovan JL. Intensive Triangulation of Qualitative Research and Quantitative Data to Improve Recruitment to Randomized Trials: The QuinteT Approach. *Qual Health Res*. 2019, Vol. 29, 5, pp. 672-679.

17. **Glaziou P, Chalmers I, Rawlins M, McCulloch P.** When are randomised trials unnecessary? Picking signal from noise. *BMJ.* 2007, Vol. 334, 7589, pp. 349-351.
18. **Poorthuis MH, Klijn CJ, Algra A, Rinkel GJ, Al-Shahi Salman R.** Treatment of cerebral cavernous malformations: a systematic review and meta-regression analysis. *J Neurol Neurosurg Psychiatry.* 2014, Vol. 85, 12, pp. 1319-1323.
19. **Rinkel LA, Al-Shahi Salman R, Rinkel GJ, Greving JP.** Radiosurgical, neurosurgical, or no intervention for cerebral cavernous malformations: A decision analysis. *Int J Stroke.* 2019, Vol. (in press).
20. **Esposito P, Coulbois S, Kehrl P, Boyer P, Dietemann JL, Rousseaux P, et al.** Place of the surgery in the management of brainstem cavernomas. Results of a multicentric study]. *Neurochirurgie.* Vol. 49, 1, pp. 5-12.
21. **Mathiesen T, Edner G, Kihlstrom L.** Deep and brainstem cavernomas: a consecutive 8-year series. *J Neurosurg.* 2003, Vol. 99, 1, pp. 31-37.
22. **Tarnaris A, Fernandes RP, Kitchen ND.** Does conservative management for brain stem cavernomas have better long-term outcome? *Br J Neurosurg.* 2008, Vol. 22, 6, pp. 748-757.
23. **Huang AP, Chen JS, Yang CC, Wang KC, Yang SH, Lai DM, et al.** Brain stem cavernous malformations. *J Clin Neurosci.* 2010, Vol. 17, 1, pp. 74-79.
24. **Kivelev J, Niemela M, Kivisaari R, Dashti R, Laakso A, Hernesniemi J.** Long-term outcome of patients with multiple cerebral cavernous malformations. *Neurosurgery.* 2009, Vol. 65, 3, pp. 450-455.
25. **Kida Y, Hasegawa T, Kato T, Sato T, Nagai H, Hishikawa T, et al.** Natural History of Symptomatic Cavernous Malformations and Results of Surgery. *Jpn J Neurosurg (Tokyo).* 2015, Vol. 24, pp. 108-118.
26. **Yoon PH, Kim DI, Jeon P, Ryu YH, Hwang GJ, Park SJ.** Cerebral cavernous malformations: serial magnetic resonance imaging findings in patients with and without gamma knife surgery. *Neurol Med Chir (Tokyo).* 1998, Vol. 38, Suppl, pp. 255-261.
27. **Lu XY, Sun H, Xu JG, Li QY.** Stereotactic radiosurgery of brainstem cavernous malformations: a systematic review and meta-analysis. *J Neurosurg.* 2014, Vol. 120, 4, pp. 982-987.
28. **Al-Shahi Salman R, Kitchen N, Thomson J, Ganesan V, Mallucci C, Radatz M, et al.** Top ten research priorities for brain and spine cavernous malformations. *Lancet Neurol.* 2016, Vol. 15, 4, pp. 354-355.
29. **Stereotactic, NHS England Clinical Reference Group for.** *Clinical Commissioning Policy: Stereotactic Radiosurgery / Radiotherapy for Cavernous Venous Malformations (Cavernomas).* s.l. : NHS England, 2013. p. D05/P/g.
30. **Raymond J, Darsaut TE, Molyneux AJ, Team collaborative Group.** A trial on unruptured intracranial aneurysms (the TEAM trial): results, lessons from a failure and the necessity for clinical care trials. *Trials.* 2015, Vol. 10, 8, p. e0136619.
31. **Magro E, Gentric JC, Darsaut TE, Ziegler D, Bojanowski MW, Raymond J.** Responses to ARUBA: a systematic review and critical analysis for the design of future arteriovenous malformation trials. *J Neurosurg.* 2017, Vols. 486-494.
32. **Donovan JL, Paramasivan S, de Salis I, Toerien M.** Clear obstacles and hidden challenges: understanding recruiter perspectives in six pragmatic randomised controlled trials. *Trials.* 2014, Vol. 15, 5.
33. **Beasant L, Brigden A, Parslow RM, Apperley H, Keep T, Northam A, et al.** Treatment preference and recruitment to pediatric RCTs: A systematic review. *Contemp Clin Trials Commun.* 2019, Vol. 14, 100335.
34. **Donovan JL, Rooshenas L, Jepson M, Elliott D, Wade J, Avery K, et al.** Optimising recruitment and informed consent in randomised controlled trials: the development and implementation of the Quintet Recruitment Intervention (QRI). *Trials.* 2016, Vol. 17, 1, p. 283.
35. **Donovan J, Mills N, Smith M, Brindle L, Jacoby A, Peters T, et al.** Quality improvement report: Improving design and conduct of randomised trials by embedding them in qualitative research: ProtecT (prostate testing for cancer and treatment) study. *BMJ.* 2002, Vol. 325, 7367, pp. 766-770.

- 1  
2  
3  
4  
5  
6  
7  
8  
9  
10  
11  
12  
13  
14  
15  
16  
17  
18  
19  
20  
21  
22  
23  
24  
25  
26  
27  
28  
29  
30  
31  
32  
33  
34  
35  
36  
37  
38  
39  
40  
41  
42  
43  
44  
45  
46  
47  
48  
49  
50  
51  
52  
53  
54  
55  
56  
57  
58  
59  
60
36. **Mills N, Donovan JL, Wade J, Hamdy FC, Neal DE, Lane JA.** Exploring treatment preferences facilitated recruitment to randomized controlled trials. *J Clin Epidemiol.* 2011, Vol. 64, 10, pp. 1127-1136.
37. **Mills N, Gaunt D, Blazeby JM, Elliott D, Husbands S, Holding P, et al.** Training health professionals to recruit into challenging randomized controlled trials improved confidence: the development of the QuinteT randomized controlled trial recruitment training intervention. *J Clin Epidemiol.* 2018, Vol. 95, pp. 34-44.
38. **Paramasivan S, Huddart R, Hall E, Lewis R, Birtle A, Donovan JL.** Key issues in recruitment to randomised controlled trials with very different interventions: a qualitative investigation of recruitment to the SPARE trial (CRUK/07/011). *T. Trials.* 2011, Vol. 12, 78.
39. **Rooshenas L, Scott LJ, Blazeby JM, Rogers CA, Tilling KM, Husbands S, et al.** The QuinteT Recruitment Intervention supported five randomized trials to recruit to target: a mixed- methods evaluation. *J Clin Epidemiol.* 2019, Vol. 106, pp. 108-120.
40. **Mills N, Blazeby JM, Hamdy FC, Neal DE, Campbell B, Wilson C, et al.** Training recruiters to randomized trials to facilitate recruitment and informed consent by exploring patients' treatment preferences. *Trials.* 2014, Vol. 15, 323.
41. **Willie JT, Malcolm JG, Stern MA, Lowder LO, Neill SG, Cabaniss BT, et al.** Safety and effectiveness of stereotactic laser ablation for epileptogenic cerebral cavernous malformations. *Epilepsia.* 2019, Vol. 60, 2, pp. 220-232.
42. **Treweek S, Pitkethly M, Cook J, Fraser C, Mitchell E, Sullivan F, et al.** Strategies to improve recruitment to randomised trials. *Cochrane Database Syst Rev* 2018. 2018, Vol. 2, MR000013.
43. **Rigamonti D, Drayer D P, Johnson P C, Hadley N M, Zabramski J, Spetzler, R F.** The MRI appearance of cavernous malformations (angiomas). *J Neurosurg.* 1987, Vol. 67, 4, pp. 518-524.
44. **Rosenow F, Alonso-Vanegas M A, Baumgartner C, Blümcke I, Carreño M, Gizewksi, E R, Hamer, H M, Knake S, Kahane P, Lüders H O, Mathern G W, Menzler K, Miller J, Otsuki T, Ozkara C, Pitkänen A, Roper S N, Sakamoto A C, Sure U, Walker M C, Steinhoff B J, Sur.** Cavernoma-related epilepsy: review and recommendations for management--report of the Surgical Task Force of the ILAE Commission on Therapeutic Strategies. *Epilepsia.* 2013, Vol. 54, 12, pp. 2025-2035.
45. **Authority, Health Research.** Applying a proportionate approach to the process of seeking consent (V1.01). [Online] 17 January 2017. [Cited: 22 September 2020.] <https://www.hra.nhs.uk/media/documents/applying-proportionate-approach-process-seeking-consent.pdf>.
46. **Principles of consent: Children and Young People (England, Wales and Northern Ireland).** *Health Research Authority.* [Online] [Cited: 21 September 2020.] <http://www.hra-decisiontools.org.uk/consent/principles-children-EngWalesNI.html>.
47. **Principles of consent: Children and Young People (Scotland).** *Health Research Authority.* [Online] [Cited: 21 September 2020.] <http://www.hra-decisiontools.org.uk/consent/principles-children-Scotland.html>.
48. **National Consent Advisory Group.** *National Consent Policy V1.3 (June 2019).* s.l. : Health Service Executive, 2019.
49. **Chohan MO, Marchio S, Morrison LA, Sidman RL, Cavenee WK, Dejana E, et al.** Emerging Pharmacologic Targets in Cerebral Cavernous Malformation and Potential Strategies to Alter the Natural History of a Difficult Disease: A Review. *JAMA Neurol.* 2019, Vol. 76, 4, pp. 492-500.
50. **The Mental Capacity Act 2005 (Loss of Capacity during Research Project) (England) Regulations 2007.** <https://www.legislation.gov.uk/uksi/2007/679/schedule/2/made>. [Online] [Cited: 20 January 2020.]
51. **S M Eldridge, C L Chan, M J Campbell, C M Bond, S Hopewell, LThabane, G A Lancaster on behalf of the PAFS consensus group.** CONSORT 2010 statement: extension to randomised pilot and feasibility trials. *BMJ.* 2016, Vol. 355, i5239.



- 1  
2  
3  
4  
5  
6  
7  
8  
9  
10  
11  
12  
13  
14  
15  
16  
17  
18  
19  
20  
21  
22  
23  
24  
25  
26  
27  
28  
29  
30  
31  
32  
33  
34  
35  
36  
37  
38  
39  
40  
41  
42  
43  
44  
45  
46  
47  
48  
49  
50  
51  
52  
53  
54  
55  
56  
57  
58  
59  
60
52. Herdman M, Gudex C, Lloyd A, Janssen M, Kind P, Parkin D, et al. Development and preliminary testing of the new five-level version of EQ-5D (EQ-5D-5L). *Qual Life Res.* 2011, Vol. 20, 10, pp. 1727-1736.
53. Wade, J, Donovan, JL, Lane, JA, Neal, DE, Hamdy, FC. It's not just what you say, it's also how you say it: opening the 'black box' of informed consent appointments in randomised controlled trials. *Social Science and Medicine (1982).* 2018-2028, 2009, Vol. 68, 11, pp. 2018-2028.
54. Paramasivan, S, Strong, S, Wilson, C, Campbell, B, Blazeby, JM, Donovan, JL. A simple technique to identify key recruitment issues in randomised controlled trials. *Trials.* 2015, Vol. 16, 88.
55. Strauss, A, Corbin, J. *Grounded theory methodology. Handbook of qualitative research*. s.l. : Sage Publications Inc, 1994. pp. 273-85.
56. Royston P, Parmar MK. Restricted mean survival time: an alternative to the hazard ratio for the design and analysis of randomized trials with a time-to-event outcome. *BMC Med Res Methodol.* 2013, Vol. 13, 152.
57. Zanello M, Meyer B, Still M, Goodden JR, Colle H, Schichor C, et al. Surgical resection of cavernous angioma located within eloquent brain areas: International survey of the practical management among 19 specialized centers. *Seizure.* 2019, Vol. 69, pp. 31-40.
58. Wilson C, Rooshenas L, Paramasivan S, Elliott D, Jepson M, Strong S, et al. Development of a framework to improve the process of recruitment to randomised controlled trials (RCTs): the SEAR (Screened, Eligible, Approached, Randomised) framework. *Trials.* 2018, Vol. 19, 1, p. 50.
59. Rooshenas L, Elliott D, Wade J, Jepson M, Paramasivan S, Strong S, et al. Conveying Equipose during Recruitment for Clinical Trials: Qualitative Synthesis of Clinicians' Practices across Six Randomised Controlled Trials. *PLoS Med.* :e1002147, 2016, Vol. 13, 10, p. e1002147.

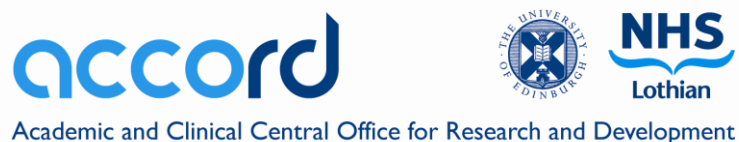

## CARE Trial Steering Committee Charter

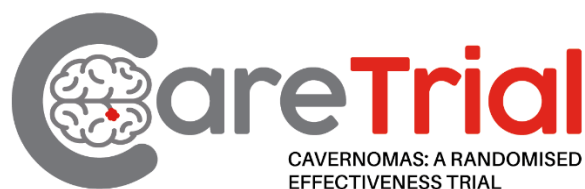

|                                         |                                                                                                                                                                                                                                       |
|-----------------------------------------|---------------------------------------------------------------------------------------------------------------------------------------------------------------------------------------------------------------------------------------|
| <b>Study Title:</b>                     | Cavernomas A Randomised Effectiveness (CARE) pilot trial, to address the effectiveness of active treatment (with neurosurgery or stereotactic radiosurgery) versus conservative management in people with symptomatic brain cavernoma |
| <b>Funder and funder reference:</b>     | National Institute for Health Research Health Technology Assessment Programme - NIHR128694                                                                                                                                            |
| <b>Chief Investigator:</b>              | Prof Rustam Al-Shahi Salman                                                                                                                                                                                                           |
| <b>Co-Sponsors:</b>                     | University of Edinburgh & NHS Lothian                                                                                                                                                                                                 |
| <b>Sponsor reference:</b>               | AC20171                                                                                                                                                                                                                               |
| <b>Trial Registration Reference(s):</b> | ISRCTN41647111                                                                                                                                                                                                                        |
| <b>REC reference:</b>                   | 21/YH/0046                                                                                                                                                                                                                            |
| <b>Charter Version Number and Date:</b> | V3.0 (08 Mar 2023)<br><i>Based on Sponsor Template CR015-T02 v2.0</i>                                                                                                                                                                 |



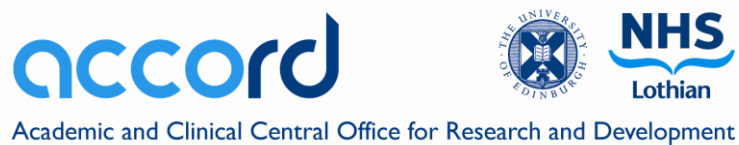

## Table of Contents

|    |                                                                                             |    |
|----|---------------------------------------------------------------------------------------------|----|
| 1  | Introduction .....                                                                          | 4  |
| 2  | Roles and Responsibilities .....                                                            | 4  |
| 3  | Before or early in the trial .....                                                          | 5  |
| 4  | Composition .....                                                                           | 6  |
| 5  | Relationships .....                                                                         | 8  |
| 6  | Organisation of TSC Meetings .....                                                          | 8  |
| 7  | Trial Documentation and Procedures to Ensure Confidentiality and Proper Communication ..... | 9  |
| 8  | Decision Making .....                                                                       | 10 |
| 9  | Reporting .....                                                                             | 11 |
| 10 | After the Trial .....                                                                       | 11 |
|    | Appendix 1: Agreement and competing interests form for independent members ..               | 12 |
|    | Appendix 2: Agreement and competing interests form for non-independent members .....        | 13 |
|    | Appendix 3: Agreement and confidentiality agreement for observers .....                     | 14 |

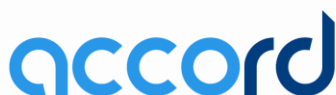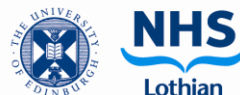

Academic and Clinical Central Office for Research and Development

## 1 Introduction

This Charter is for the Trial Steering Committee (TSC) for the Cavernomas A Randomised Effectiveness (CARE) pilot trial, a pilot randomised controlled trial (RCT) which aims to assess the feasibility of conducting a definitive main phase RCT to address the research question "How effective is active treatment (with neurosurgery or stereotactic radiosurgery) versus conservative management in people with symptomatic brain cavernoma?". The trial objectives are to:

1. Engage a collaboration of specialists and patient advocacy groups in the UK and Ireland.
2. Establish a pilot RCT, with an embedded qualitative study to understand the anticipated recruitment processes and address any barriers.
3. Assess the feasibility of performing a definitive main phase of the RCT.

This charter will define the primary responsibilities of the TSC, its membership, and the purpose and timing of its meetings. It will also provide the procedures for ensuring confidentiality and proper communication, decision making, reporting and after trial publications. The trial will be conducted in accordance with sponsor SOPs (<https://www.accord.scot/research-access/resources-researchers/sop>). The contents of the Charter are based on the NIHR Research Governance Guidelines for Trial Steering Committees (<https://www.nihr.ac.uk/documents/research-governance-guidelines/12154>).

## 2 Roles and Responsibilities

The role of the TSC is to provide overall supervision for this project on behalf of the Project Sponsor (ACCORD) and Project Funder (NIHR HTA) and to ensure that the project is conducted to the rigorous standards set out in the Department of Health's Research Governance Framework for Health and Social Care and the Guidelines for Good Clinical Practice.

The specific roles of the TSC include:

- Provide oversight of the trial and monitor the overall conduct of the trial. The TSC should provide advice through its independent Chair to the Chief Investigator (CI) and Trial Management Group (TMG) on all appropriate aspects of the trial.
- Concentrate on progress of the trial, QuinteT Recruitment Intervention (QRI) progress and recommendations, adherence to the protocol, patient safety and the consideration of new information of relevance to the research question
- Ensure appropriate ethical and other approvals are obtained in line with the project plan
- Review regular trial progress reports
- Monitor recruitment rates and advise the TMG about strategies to deal with recruitment issues

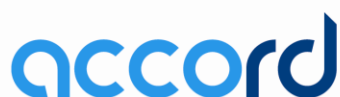

Academic and Clinical Central Office for Research and Development

- Monitor follow-up completeness and advise the TMG about strategies to deal with retention issues
- Review serious adverse events blind to treatment allocation
- Assess the impact and relevance of any accumulating external evidence (any relevant external evidence identified by the CI will be passed onto the TSC Chair for review by the committee)
- Review and accept/reject recommendations from the DMC to amend the protocol or conduct of the study
- Contribute to enhancing the integrity of the trial. The TSC may also formulate recommendations relating to:
  - The selection, recruitment, or retention of participants, or their management
  - Extending recruitment or follow up
  - Improving participant adherence to protocol-specified regimens
  - Procedures for data management and quality control
- Promptly review DMC recommendations which include deciding to continue or terminate the trial
- Oversee the timely reporting of the trial results
- Maintain confidentiality of all trial information that is not already in the public domain
- Comment on the main trial manuscript before publication (if desired)

### 3 Before or early in the trial

All potential TSC members will have sight of the protocol before the first TSC meeting. Before recruitment begins, the trial will have undergone review by the sponsor and a research ethics committee. Therefore, if a potential TSC member has major reservations about the trial (e.g. the protocol or the logistics) they should report these to the CI and may decide to decline the invitation to join. TSC members should be constructively critical of the ongoing trial, but also supportive of aims and methods of the trial.

The TSC will meet before the start of recruitment to the trial, to discuss the protocol, methods of providing information to and from the TSC, frequency and format of meetings, relationships with other committees and have the opportunity to clarify any aspects with the CI and Co-Chief Investigator. TSC input into the protocol will be discussed with the CI before deciding what protocol updates need to be implemented.

Members and observers of the TSC will not be asked to formally sign a contract but should formally register their assent by confirming (1) that they agree to be a member of the TSC and (2) that they agree with the contents of this Charter by signing and dating the required form (Appendices 1-3).

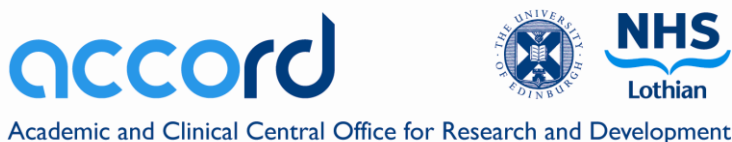

## 4 Composition

TSC members were selected and approved by the funder in accordance with NIHR Research Governance Guidelines (V1.0 February 2019).

### The Chairperson

The Chair of the TSC will be independent of the trial and have experience of serving on previous TSC(s). The Chair is directly answerable to the relevant NIHR programme, as funder and the primary TSC reporting line is via the Chair to the relevant NIHR Programme Director; however communication is likely to be between the Chair, the trial manager and the NIHR Research Manager who has day to day responsibility for the project.

The Chair's specific responsibilities include:

- Liaising with the CI to arrange a meeting to finalise the protocol and to set up a schedule of meetings to align with the project plan
- Establishing clear reporting lines to the Funder, Sponsor, etc.
- Being familiar with relevant guidance documents and with the role of the DMC, if appropriate
- Providing an independent\*, experienced opinion if conflicts arise between the needs of the research team, the funder, the sponsor, the participating organisations and/or any other agencies
- Leading the TSC to provide regular, impartial oversight of the study, especially to identify and pre-empt problems
- Ensuring that changes to the protocol are debated and endorsed by the TSC. Letters of endorsement should be made available to the project team when requesting approval from the funder and sponsor for matters such as changes to protocol
- Being available to provide independent\* advice as required, not just when TSC meetings are scheduled
- Commenting on any extension requests and, where appropriate, providing a letter to the funder commenting on whether the extension request is supported or otherwise by the independent\* members of the TSC
- Commenting in detail (when appropriate) regarding the continuation, extension or termination of the project. NB: The TSC Chair does not need to be a content expert him/herself but needs to ensure that sufficient content expertise is available for the group to perform its oversight function effectively

### \* Independence

According to the NIHR Research Governance Guidelines, independence is defined as:

- Not part of the same institution as any of the applicants or members of the project team
- Not part of the same institution that is acting as a recruitment or investigative centre, including Patient Identification Centres (PIC), identifying and referring



Academic and Clinical Central Office for Research and Development

patients to a recruitment or investigative centre (in both cases, 'not part of the same institution' means holding neither a substantive or honorary contract with said institution)

- Not related to any of the applicants or members of the project team
- For the chair only: not an applicant on a rival proposal

### TSC membership and voting

The TSC will consist of a minimum of 75% independent members. Only appointed TSC members will be entitled to a vote and the chair will have a casting vote. To minimise the risk that fewer than 75% of TSC members are independent at a TSC meeting, the CI is an observer and not formally a member of the TSC for this trial and therefore cannot vote. Attendance of non-members at meetings is at the discretion of the TSC Chair.

The **members** of the TSC are listed below.

| Name of Member            | Role in TSC           | Responsibility                                                | Independent |
|---------------------------|-----------------------|---------------------------------------------------------------|-------------|
| Prof Garth Cruickshank    | Independent Chair     | Provide independent neurosurgical and trial expertise         | Y           |
| Prof Catherine Hewitt     | Independent member    | Provide independent statistical expertise                     | Y           |
| Mr Richard Kerr           | Independent member    | Provide independent vascular neurosurgery and trial expertise | Y           |
| Prof Haleema Shakur-Still | Independent member    | Provide independent clinical trial management expertise       | Y           |
| Mr Ian Stuart             | Independent member    | Patient/carer representative                                  | Y           |
| Mr David White            | Independent member    | Patient/carer representative                                  | Y           |
| Mr Neil Kitchen           | Co-chief investigator | Neurosurgical lead                                            | N           |

The **observers** of the TSC are listed below.

|                             |                             |                                                                                                |   |
|-----------------------------|-----------------------------|------------------------------------------------------------------------------------------------|---|
| Prof Rustam Al-Shahi Salman | Chief Investigator          | Inform TSC of any relevant updates                                                             | N |
| Prof Steff Lewis            | Study Statistician          | Blinded trial statistician                                                                     | N |
| Dr Laura Forsyth            | Trial Manager / Facilitator | Co-ordinate meetings and facilitate the group                                                  | N |
| Dr Julia Wade               | Lead Qualitative Researcher | Report on the progress, conduct, and outcomes of the embedded QuniteT Recruitment Intervention | N |



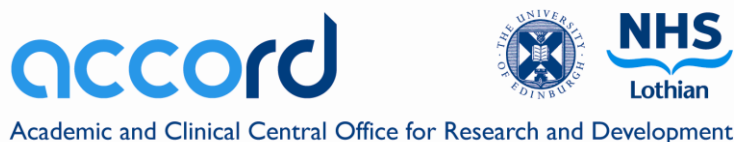

## 5 Relationships

### TSC / DMC relationship

The TSC is the oversight body of the trial. All substantial issues regarding the trial must go to the TSC for consideration. The DMC is advisory to the TSC.

### Payments to TSC members

If required, standard travel and accommodation costs will be paid to members of the TSC. No other payments or rewards will be given.

### Competing Interests

Any competing interests, either real or potential, should be disclosed before TSC meetings (see Appendices). These are not restricted to financial matters, involvement in other trials or intellectual investment could be relevant. Although members may well be able to act objectively despite such connections, complete disclosure enhances credibility.

## 6 Organisation of TSC Meetings

### Meeting Frequency and Format

The TSC should have a formal meeting at least yearly. At the request of the TSC, interim meetings will be organised. Meetings will be scheduled to follow shortly after DMC meetings so that any DMC recommendations can be considered, if appropriate. The responsibility for calling and organising TSC meetings lies with the CI who will be assisted by the Trial Manager/Facilitator.

Meetings will be held either in person, by video-conference (e.g. Zoom, MS Teams) or by teleconference. Major trial issues may need to be dealt with between meetings, by phone, video-conference or by email. TSC members should be prepared for such instances. There may be occasions when the Sponsor or the Funder will wish to organise and administer these meetings for particular projects. This is unlikely, but the NIHR reserves the right to attend any meeting therefore should be included in relevant invitations and also reserves the right to convene a meeting of the TSC in exceptional circumstances.

### Attendance

Presence will be usually limited to the TSC members, observers and the Facilitator (and/or their delegate) however, other attendees such as representatives of the Funder and Sponsor may also be invited to all or part of every meeting by the TSC. Other observers who are not members of the TSC may be invited to provide expert input.

Effort will be made to ensure that all members can attend. The CI must try to attend all meetings, especially if major actions are expected. In the case of face to face meetings, members who cannot attend in person will be encouraged to participate by teleconference/videoconference. If TSC members cannot attend meetings by tele-/video-conference, they will be encouraged to send comments in advance via email.

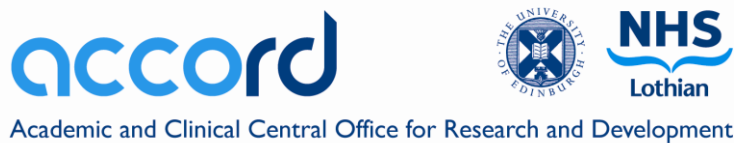

## Quoracy

If, at short notice, any TSC members cannot attend then the TSC may still meet if at least five members (two thirds of the appointed membership) including the Chair will be present, plus a member of the trial team. If the TSC is considering a major action after such a meeting the TSC Chair should communicate with the absent members, including the CI, as soon after the meeting as possible to check they agree. If they do not, a further meeting should be arranged with the full TSC.

## Non-attendance

TSC members who will not be able to attend the meeting should pass comments to the TSC Chair in advance for consideration during the discussion. If an independent member does not attend a meeting or provide comments when requested between meetings, it will be ensured that the independent member is available for the next meeting. If an independent member does not attend the next meeting or provide comments when next requested, they will be asked if they wish to remain part of the TSC. If an independent member does not attend a third meeting, strong consideration will be given to replacing this member.

## 7 Trial Documentation and Procedures to Ensure Confidentiality and Proper Communication

### Progress Report and Meeting Minutes

At the first meeting, the TSC will review the project plan and discuss targets for recruitment, data collection, compliance etc. Based on these targets, the TSC should agree a set of data that should be presented in a progress report at each meeting. The progress report will be written and presented by the Chief Investigator (or designee) and will include updates on trial progress, recruitment, participant drop-out, safety data (SAEs), adherence to the protocol (deviations and violations), summary of new evidence/literature review, publications and A.O.B, as appropriate. The TSC will receive the report and any associated documentation at least two weeks before the meeting.

Minutes will be prepared by the facilitator on behalf of the CI, and uploaded to the NIHR MIS. Copies of minutes will be sent to all members, the sponsor and the funder, and a copy will be retained in the Trial Master File. These minutes and actions will be used as a basis for the following TSC meeting agenda.

### External evidence

Identification and circulation of published external evidence (e.g. from other trials/ systematic reviews) is a responsibility of the CI. The TSC should continue to be made aware of other data that may impact on the trial.

### Communication

The facilitator will be responsible for the organisation of meetings and should be copied into all communications with and between the TSC.

### Confidentiality

TSC members are expected to store securely copies of the reports to and from the



TSC, agenda and minutes, as well as copies of communications between meetings. All documentation should be considered confidential.

## 8 Decision Making

### TSC / DMC decision-making

The TSC is jointly responsible with the DMC for safeguarding the interests of participating patients and for the conduct of the trial. Recommendations to amend the protocol or conduct of the study made by the DMC will be considered and accepted or rejected by the TSC. The TSC will be responsible for deciding whether to continue or to stop the trial based on the DMC recommendations.

Possible decisions by the TSC include:

- No action needed, trial continues as planned
- Early termination of the trial (e.g. because of harm of treatment or futility or external evidence. This would generally be after a recommendation from the DMC).
- Stopping recruitment within a subgroup
- Extending recruitment or extending follow-up
- Sanctioning or proposing protocol changes

Based on other factors, other possible decisions could include:

- Approving proposed new trial sub-studies
- Approving presentation of results during the trial or soon after closure
- Approval of strategies to improve recruitment or follow-up
- Approving feasibility of proceeding to a definitive main phase trial application

### Considerations on statistical methods

Formal statistical methods may have been considered by the DMC in making their recommendations to the TSC. These methods are usually used as guidelines rather than absolute rules. This is because they generally only consider one dimension of the trial. The DMC will record reasons for disregarding stopping guidelines and will review and agree any interim analysis plan and note these decisions in their meetings and may choose to also note this in their report to the TSC if necessary.

### Consensus and quoracy

Every effort should be made to achieve consensus. The role of the Chair is to summarise discussions and encourage consensus; therefore, it is usually best for the Chair to give their own opinion last. If a vote is required to achieve consensus, all independent members of the TSC have the opportunity to cast a vote with the chair voting last. The CI is not able to cast a vote.

To be quorate, at least five members (two thirds of the appointed membership) including the Chair will be present, plus a member of the trial team. It is important that the implications (e.g. ethical, statistical, practical, and financial) for the trial be considered before any decision is made.



The DMC will be notified of all changes to the protocol or to study conduct. The DMC's approval will be sought on all substantive recommendations or changes to the protocol or study conduct before their implementation.

## 9 Reporting

### TSC recommendations

Notes of key points, decisions and actions will be made by the Facilitator. This will include details of whether potential competing interests have changed for any attendees since the previous meeting. The draft minutes will be initially circulated for comment to those TSC members who were present at the meeting. The TSC Chair will approve the final version of minutes within three weeks of the meeting and a copy sent to all attendees and the NIHR. Copies will be retained in the Trial Master File and archived at the time of study closure. The TSC may also provide feedback to the DMC, and where appropriate the Sponsor. Copies of communications will pass through the Facilitator.

The TSC is the oversight body for the trial. However the TSC should have good reason before deciding not to accept requests from the TMG or DMC. If there are serious problems or concerns with the TSC decision following a DMC recommendation, a joint meeting of the TSC and DMC should be held. The information to be shown would depend upon the action proposed and each committee's concerns. Depending on the reason for the disagreement confidential data and/or data by trial and may have to be revealed to all or some of those attending such a meeting: this would be minimised where possible. The meeting would be chaired by an external expert who is not directly involved with the trial.

## 10 After the Trial

### Publication of results

The TSC will oversee the timely analysis, writing up and publication of the main trial results. The independent members of the TSC will have the opportunity to read and comment on the proposed main publications of trial data prior to submission and abstracts and presentations during the trial. This review may be concurrent to that of the trial investigators and DMC. TSC members will be named and their affiliations listed in the main report, unless they explicitly request otherwise.

### Confidentiality of results

Unless permission has been agreed with the TSC, individual members will not discuss confidential information to which they have become party as a result of their involvement in the trial until 12 months after the primary trial results have been published.

**Appendix 1: Agreement and competing interests form for independent members**

**Trial Steering Committee: Agreement to join the CARE Trial Steering Committee as an independent member and disclosure of potential competing interests**

*Please complete the following document and return to the TSC Facilitator.*

(please **initial** box to agree)

|  |                                                                                                                                         |
|--|-----------------------------------------------------------------------------------------------------------------------------------------|
|  | I have read and understood the CARE pilot trial TSC Charter version 3.0 dated 08 March 2023 and agree with the contents of this Charter |
|  | I agree to join the Trial Steering Committee for this trial as an <b>independent</b> member                                             |
|  | I agree to treat all sensitive trial data and discussions confidentially                                                                |

The avoidance of any perception that independent members of a TSC may be biased in some fashion is important for the credibility of the decisions made by the TSC and for the integrity of the trial. Potential competing interests should be disclosed via the study office. In many cases simple disclosure up front should be sufficient. Otherwise, the (potential) independent TSC member should remove the conflict or stop participating in the TSC. **Table 1** lists potential competing interests.

|  |                                                                          |
|--|--------------------------------------------------------------------------|
|  | <b>No</b> , I have no competing interests to declare                     |
|  | <b>Yes</b> , I have competing interests to declare (please detail below) |

Please provide details of any competing interests:

---

**NAME:** \_\_\_\_\_

**SIGNATURE:** \_\_\_\_\_

**DATE:** \_\_\_\_\_

**Table 1: Potential competing interests for independent members**

- Stock ownership in any commercial companies involved
- Stock transaction in any commercial company involved (if previously holding stock)
- Consulting arrangements with the Sponsor/Funder
- Frequent speaking engagements on behalf of the intervention
- Career tied up in a product or technique assessed by trial
- Hands-on participation in the trial
- Involvement in the running of the trial
- Emotional involvement in the trial
- Intellectual conflict e.g. strong prior belief in the trial's experimental arm
- Involvement in regulatory issues relevant to the trial procedures
- Involvement in the writing up of the main trial results in the form of authorship

## Appendix 2: Agreement and competing interests form for non-independent members

### **Trial Steering Committee: Agreement to join the CARE Trial Steering Committee as a non-independent member and disclosure of potential competing interests**

Please complete the following document and return to the TSC Facilitator.

(please initial box to agree)

|  |                                                                                                                                         |
|--|-----------------------------------------------------------------------------------------------------------------------------------------|
|  | I have read and understood the CARE pilot trial TSC Charter version 3.0 dated 08 March 2023 and agree with the contents of this Charter |
|  | I agree to join the Trial Steering Committee for this trial as a <b><u>non-independent</u></b> member                                   |
|  | I agree to treat all sensitive trial data and discussions confidentially                                                                |

The notion that non-independent members can act objectively despite potential competing interests is important for the credibility of the decisions made by the TSC and for the integrity of the trial. Potential competing interests should be disclosed via the study office. In many cases simple disclosure up front should be sufficient. Otherwise, the (potential) non-independent TSC member should remove the conflict or stop participating in the TSC. **Table 1** lists potential competing interests.

|  |                                                                          |
|--|--------------------------------------------------------------------------|
|  | <b>No</b> , I have no competing interests to declare                     |
|  | <b>Yes</b> , I have competing interests to declare (please detail below) |

Please provide details of any competing interests:

NAME: \_\_\_\_\_

SIGNATURE: \_\_\_\_\_

DATE: \_\_\_\_\_

#### **Table 1: Potential competing interests for non-independent members**

- Stock ownership in any commercial companies involved
- Stock transaction in any commercial company involved (if previously holding stock)
- Consulting arrangements with the Sponsor/Funder
- Frequent speaking engagements on behalf of the intervention
- Intellectual conflict e.g. strong prior belief in the trial's experimental arm
- Involvement in regulatory issues relevant to the trial procedures

**Appendix 3: Agreement and confidentiality agreement for observers****Trial Steering Committee: Agreement to attend the CARE Trial Steering Committee and treat all information confidentially**

*Please complete the following document and return to the TSC Facilitator.*

(please **initial** box to agree)

I agree to attend the Trial Steering Committee meeting on \_\_\_/\_\_\_/\_\_\_\_\_

I agree to treat as confidential any sensitive information gained during this meeting and all future meetings unless explicitly permitted

**NAME:**

\_\_\_\_\_

**SIGNATURE:**

\_\_\_\_\_

**DATE:**

\_\_\_\_\_

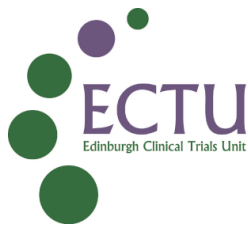

Statistical Analysis Plan CARE  
 Version No 1.0  
 Date Finalised 8<sup>th</sup> Dec 2022

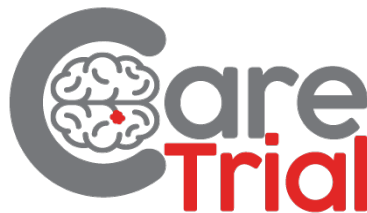

Cavernomas A Randomised Effectiveness (CARE) pilot trial, to address the effectiveness of active treatment (with neurosurgery or stereotactic radiosurgery) versus conservative management in people with symptomatic brain cavernoma

### Statistical Analysis Plan

## CONFIDENTIAL

|                         |                             |
|-------------------------|-----------------------------|
| <b>Version No</b>       | v1.0                        |
| <b>Date Finalised</b>   | 8 Dec 2022                  |
| <b>Author(s)</b>        | Dr Jacqueline Stephen       |
| <b>CI Name</b>          | Prof Rustam Al-Shahi Salman |
| <b>CI Email address</b> | Rustam.Al-Shahi@ed.ac.uk    |

| Signatures                                                                                                                                         |                               |
|----------------------------------------------------------------------------------------------------------------------------------------------------|-------------------------------|
| <b>Trial Statistician:</b><br>                                  | <b>Date: 12 Dec 2022</b>      |
| <b>Chief Investigator:</b><br><br><b>RUSTAM AL-SHAHI SALMAN</b> | <b>Date: 12 December 2022</b> |

| Document Control |            |                      |
|------------------|------------|----------------------|
| Version No       | Date       | Summary of Revisions |
| 1.0              | 8 Dec 2022 | Initial Creation     |
|                  |            |                      |
|                  |            |                      |



Statistical Analysis Plan CARE  
 Version No 1.0  
 Date Finalised 8<sup>th</sup> Dec 2022

## Table of Contents

|                                                               |    |
|---------------------------------------------------------------|----|
| <b>List of Abbreviations</b> .....                            | 3  |
| <b>1. Introduction</b> .....                                  | 4  |
| <b>2. Statistical Methods section from the protocol</b> ..... | 4  |
| <b>3. Overall Statistical Principles</b> .....                | 5  |
| <b>4. List of Analyses</b> .....                              | 5  |
| 4.1 Outcomes .....                                            | 5  |
| 4.2 Serious adverse events.....                               | 9  |
| <b>5. Validation and QC</b> .....                             | 10 |
| <b>6. Data sharing</b> .....                                  | 10 |
| <b>7. References</b> .....                                    | 10 |

Preprint peer review only

Statistical Analysis Plan CARE  
Version No 1.0  
Date Finalised 8<sup>th</sup> Dec 2022

## List of Abbreviations

| Abbreviation | Full name                      |
|--------------|--------------------------------|
| CI           | Confidence interval            |
| CRF          | Case report form               |
| ECTU         | Edinburgh Clinical Trials Unit |
| FND          | Focal neurological deficit     |
| ICH          | Intracranial haemorrhage       |
| IQR          | Inter quartile range           |
| ITT          | Intention-to-treat             |
| mRS          | Modified rankin scale          |
| RCT          | Randomised controlled trial    |
| SAE          | Serious adverse events         |
| SD           | Standard deviation             |
| SOP          | Standard operating procedure   |

|                           |                          |
|---------------------------|--------------------------|
| Statistical Analysis Plan | CARE                     |
| Version No                | 1.0                      |
| Date Finalised            | 8 <sup>th</sup> Dec 2022 |

## 1. Introduction

This document details the criteria to be used for the definition of the analysis populations and the statistical methodology for analysis of CARE, a two-arm, parallel group randomised feasibility trial which aims to estimate the feasibility of performing a definitive main phase randomised controlled trial (RCT) comparing medical management to medical and surgical management (with neurosurgery or Gamma Knife stereotactic radiosurgery, according to their availability in clinical practice) for improving outcomes for people with symptomatic brain cavernoma.

The aim is to randomise approximately 60 participants to groups in a 1:1 ratio, to medical management alone, or medical and surgical management, stratified by preferred type of surgical management. If there is no clear preference for the type of surgical management, and both are available, the patient will be randomly allocated to either neurosurgery or stereotactic radiosurgery, and then randomised between medical management alone, or medical and surgical management.

This document has been compiled according to the Edinburgh Clinical Trials Unit (ECTU) standard operating procedure (SOP) "Statistical Analysis Plans v6.0" and has been written based on information contained in the study protocol version 2.0, dated 22<sup>nd</sup> March 2021.

The pilot phase of CARE will be submitted for publication and reported according to the CONSORT 2010 extension to randomised pilot and feasibility trials.<sup>1</sup>

## 2. Statistical Methods section from the protocol

*In this pilot phase, analyses are descriptive only, and there will be no formal statistical tests.*

*We will quantify the number and proportions (with 95% confidence intervals to reflect their precision) of patients who are screened, eligible, approached, consent and are randomised. We will construct a CONSORT diagram to summarise the distribution and progress of participants in the trial including the numbers of withdrawals.<sup>1</sup>*

*We will report descriptively the following: the number and the proportion of the collaborating sites that take part and recruit participants to the CARE pilot trial; research teams' implementation of trial procedures measured by number and type of protocol deviation; the numbers of participants allocated to neurosurgery and stereotactic radiosurgery; adherence to the allocated intervention; completeness of follow-up that would be due at each 6-month interval; completeness of baseline, imaging and outcome data; the frequency of outcome events overall and in an intention-to-treat analysis keeping patients in the treatment group to which they were allocated during all available follow-up.*

*We will also compare descriptively the characteristics of eligible patients who are screened and do not participate in the CARE pilot trial to eligible patients who are randomised using the*

|                           |                          |
|---------------------------|--------------------------|
| Statistical Analysis Plan | CARE                     |
| Version No                | 1.0                      |
| Date Finalised            | 8 <sup>th</sup> Dec 2022 |

characteristics recorded on the screening logs to assess generalisability (external validity) and any recruitment bias.

We will assess measures of functional outcome, to assess which has suitable statistical properties for use in a main phase trial (such as lack of floor/ceiling effects). We will assess whether such a measure (like the method we have used before<sup>2</sup>) would be more suitable as a primary outcome in place of intracranial haemorrhage.

### 3. Overall Statistical Principles

The analysis dataset for the trial will include all screened patients in addition to eligible, approached, consented, and randomised participants.

All analyses will be based on the intention to treat (ITT) principle with patients analysed according to allocated treatment, irrespective of whether they adhered to the allocated treatment, in the group to which they were allocated.

In general terms, categorical data will be presented using counts and percentages, whilst continuous variables will be presented using the mean, median, standard deviation (SD), minimum, maximum, inter quartile range (IQR) and number of patients with an observation.

All analyses and data manipulations will be carried out using SAS version 9.4 or later.

### 4. List of Analyses

In this pilot trial, analyses are descriptive only, and there will be no formal statistical significance tests.

The outcomes of the pilot trial follow the SEAR (screened, eligible, approached, and randomised) framework for recording the recruitment process and reasons for non-participation<sup>3</sup>: Screening, to identify potentially eligible trial participants; Eligibility, assessed against the trial protocol inclusion/exclusion criteria; Approach, the provision of oral and written information and invitation to participate in the trial; and Randomised.

#### 4.1 Outcomes

Descriptive statistics of the following outcomes will be reported for the entire pilot trial population:

1. The number of active sites, and the number of sites who have randomised participants
2. Implementation of trial procedures correctly as assessed by the number and type of protocol deviations recorded. The numbers of deviations will be tabulated, and deviations will be listed.

|                           |                          |
|---------------------------|--------------------------|
| Statistical Analysis Plan | CARE                     |
| Version No                | 1.0                      |
| Date Finalised            | 8 <sup>th</sup> Dec 2022 |

3. The numbers and proportions of patients (overall, and by site) who are screened, eligible, approached, uncertain, consented and randomised, which will be defined as:
- Screened: Number of patients screened with sufficient information to determine eligibility.
  - Eligible: Screened patients meeting the trial's eligibility criteria (quantify any patients for whom this is uncertain separately). Proportion of screened patients who were eligible =  $b/a$ .
  - Approached: Eligible patients who were approached for discussion (quantify any patients who were not approached and why or where this is unknown, separately). Proportion of eligible patients who were approached =  $c/b$ .
  - Uncertain: Eligible patients who were approached about treatment with vs. without surgery and both doctor and patient were uncertain and therefore confirmed fully eligible (quantify any patients where only doctor, only patient, or neither is uncertain, or where this is unknown). Proportion of approached patients who are fully eligible =  $d/c$ .
  - Consent: Fully eligible patients who have provided consent (quantify any not consented with reasons separately). Proportion of fully eligible patients who provide consent =  $e/d$ . Method of obtaining consent and who provided consent for the randomised study will be summarised.
  - Randomised: Fully eligible patients consented, and randomised (quantify any patients who were not randomised and why or where this is unknown, separately). Proportion of eligible patients who were randomised =  $f/b$ .
  - Withdrawn: Randomised patients who have withdrawn including who is withdrawing the participant, reason for and type of withdrawal (overall only, not by site).
- Proportions will be given with 95% confidence intervals (CI) (overall only, not by site).
4. Baseline characteristics will be summarised using descriptive statistics for eligible participants who were randomised versus eligible participants who were not randomised based on data collected at screening.
- Source of screening
  - Speciality doing screening
  - Clinical history attributable to a brain cavernoma
    - Intracranial haemorrhage (ICH): one versus more than one vs none
    - Focal neurological deficit (FND): yes/no
    - Either ICH or FND
    - Epileptic seizure(s): yes versus no
  - Location of the symptomatic brain cavernoma (supratentorial lobar vs supratentorial deep grey matter vs brainstem vs cerebellum)
  - Time from most recent symptomatic event (months)
5. The number of participants randomised will be presented numerically overall and by site, and graphically overall over time.

|                           |                          |
|---------------------------|--------------------------|
| Statistical Analysis Plan | CARE                     |
| Version No                | 1.0                      |
| Date Finalised            | 8 <sup>th</sup> Dec 2022 |

6. The overall recruitment rate per month with 95% CI and the recruitment rate per site per month.

Descriptive statistics of the following baseline data and outcomes will be reported for (1) randomised participants overall and by randomised group, and (2) randomised participants by randomised group and stratification variable (preferred type of surgical management: neurosurgery versus stereotactic radiosurgery):

7. Baseline characteristics

- Age
- Gender
- Ethnicity
- Symptomatic brain cavernoma presentation
  - Brain cavernoma-related symptomatic ICH
  - Brain cavernoma-related symptomatic persistent or progressive FND
  - Brain cavernoma-related symptomatic epileptic seizure(s)
- Symptomatic brain cavernoma details as reported by the investigator
  - Number of cavernomas (brain or spinal) (single versus multiple and median number in those with multiple)
  - Side of symptomatic brain cavernoma that could be managed surgically
  - Location of symptomatic brain cavernoma that could be managed surgically
  - Proximity of symptomatic brain cavernoma to surface of this location
  - Prior treatment of symptomatic brain cavernoma
- Brain cavernoma certainty and imaging characteristics as reported by the study neuroradiologist
  - Received brain imaging required to confirm symptomatic brain cavernoma diagnosis and mode of presentation
  - Certainty about diagnosis of the symptomatic cavernoma
- Intended type of surgical management agreed
- Other medical history
- Current medication
- Current therapies
- Modified Rankin scale score (adults only)
- NIH stroke scale score total
- Karnofsky Performance scale (adults only)
- Lansky play performance scale (children only)
- EQ-5D (Index and visual analogue scale (VAS))
- Liverpool seizure severity scale (only patients with epileptic seizures in the preceding 4 weeks)

8. Intervention characteristics

- Surgical management in participants undergoing neurosurgical excision
  - Type of anaesthesia
  - Craniotomy performed but cavernoma not found
  - Was neuro-navigation used
  - Was neurophysiological monitoring/stimulation used
  - Was intra-operative MRI performed
  - Was functional MRI performed

|                           |                          |
|---------------------------|--------------------------|
| Statistical Analysis Plan | CARE                     |
| Version No                | 1.0                      |
| Date Finalised            | 8 <sup>th</sup> Dec 2022 |

- Grade of most senior neurosurgeon performing the procedure
  - Did the participant return to theatre for re-operation
  - Was post-operative MRI performed during this admission
  - Surgical management in participants undergoing stereotactic radiosurgery
    - Location of stereotactic radiosurgery
    - Treatment prescription dose
    - Prescription isodose
    - Maximum dose
    - Paddick Conformity Index
    - Dose Gradient Index
    - Coverage
    - Treatment volume
    - Frame or mask-based
  - Were any novel therapies used
    - Magnetic resonance thermography-guided laser interstitial thermal therapy used
    - Stereotactic laser ablation used
    - Other novel technique used
  - Medical management
    - Physiotherapy
    - Speech and language therapy
    - Psychology
    - Occupational therapy
9. The number and proportion of randomised patients adherent to
- a) the allocated intervention based on
    - i. intervention received and
    - ii. whether the pre-specified type of surgical management (neurosurgery/radiosurgery) was the same as the type of intervention received
  - b) follow-up based on completion of 6-month review CRF for those participants who are alive. Completeness of individual sections of the CRF will be summarised.
10. Completeness of data presented as the number and proportion with missing data for:
- a) Baseline. Defined as completion of the baseline CRF.
  - b) Imaging. Defined as “Received brain imaging required to confirm symptomatic brain cavernoma diagnosis and mode of presentation” = yes, and at 6-months defined as “6-month MRI performed” = yes from the brain imaging data (not the CRF).
  - c) Outcomes. Defined as completion of the follow-up review CRF for all follow-up time points (6, 12 and 18 months) that should have been reached by the participant. Completeness of individual sections of the CRF will be summarised.
11. Outcome event rates will be quantified using the number and proportion of participants with an event, the number of events, and the average event rate per participant per year. Outcome functional scores will be summarised descriptively and graphically to explore which has suitable statistical properties for use in a main phase trial (such as lack of floor/ceiling effects) for each time point available (6, 12 and 18 months). Clinical outcomes are:

Primary

|                           |                          |
|---------------------------|--------------------------|
| Statistical Analysis Plan | CARE                     |
| Version No                | 1.0                      |
| Date Finalised            | 8 <sup>th</sup> Dec 2022 |

- Intracranial haemorrhage or new persistent/progressive focal neurological deficit due to brain cavernoma or surgical management (neurosurgery or stereotactic radiosurgery), whether fatal (leading to death within 30 days of the outcome event) or non-fatal.

#### Secondary

- Death not due to a primary clinical outcome
- Liverpool Seizure Severity Scale plus epileptic seizure frequency (number of seizures in the preceding four weeks, and attainment of one-year seizure freedom)
- Modified Rankin Scale (mRS) score
- National Institute of Health Stroke Scale Score (adult or paediatric)
- EQ-5D-5L in adults and EQ-5D-Y in children
- Karnofsky Performance Status scale in adults and Lansky Play-Performance Scale in children

## 12. Follow-up imaging

### 6 month follow-up MRI

- MRI acquired as required by the protocol
- Is the symptomatic cavernoma that led to the participant's enrolment still present?
- Evidence of neurosurgical excision of the symptomatic brain cavernoma
  - If yes, was excision complete
- Evidence of stereotactic radiosurgery for the symptomatic brain cavernoma
  - If yes, change in cavernoma size, new signal change in surrounding brain, probable radio necrosis

### Outcome Imaging

- Evidence of acute haemorrhage and locations

Outcomes 9-13 as listed in the protocol are not within the scope of this analysis plan and will be handled separately using data provided in this report to inform decisions for the design of the definitive main phase trial.

The analyses of the QuinteT recruitment intervention and health economics are also not within the scope of this analysis plan and will be handled separately.

## 4.2 Serious adverse events

Serious adverse events (SAEs) are reported if they are not outcome events or expected complications related to medical and surgical management.

SAEs will be summarised by treatment received and a listing will be produced detailing each event, and what happened to the patient subsequently.



|                           |                          |
|---------------------------|--------------------------|
| Statistical Analysis Plan | CARE                     |
| Version No                | 1.0                      |
| Date Finalised            | 8 <sup>th</sup> Dec 2022 |

## 5. Validation and QC

The statistical report will be read and sense-checked by a second statistician.

## 6. Data sharing

A file, or set of files, containing the final data will be prepared, along with a data dictionary. These will be made available to the Chief Investigator at the end of the analysis phase.

Following publication of the primary paper, a de-identified individual participant data set will be prepared for sharing purposes.

## 7. References

1. Eldridge SM, Chan CL, Campbell MJ, et al. CONSORT 2010 statement: extension to randomised pilot and feasibility trials. *BMJ* 2016; **355**: i5239.
2. Moultrie F, Horne MA, Josephson CB, et al. Outcome after surgical or conservative management of cerebral cavernous malformations. *Neurology* 2014; **83**(7): 582-9.
3. Wilson C, Rooshenas L, Paramasivan S, et al. Development of a framework to improve the process of recruitment to randomised controlled trials (RCTs): the SEAR (Screened, Eligible, Approached, Randomised) framework. *Trials* 2018; **19**(1): 50.

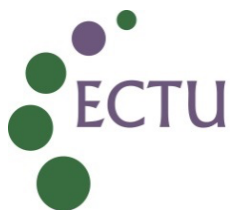

Version No 1.0  
Effective Date 7 February 2023

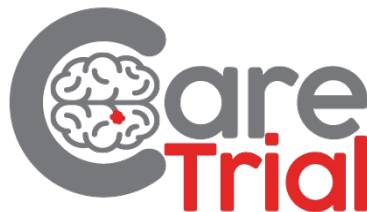

CARE

Cavernomas A Randomised Effectiveness (CARE) pilot trial, to address the effectiveness of active treatment (with neurosurgery or stereotactic radiosurgery) versus conservative management in people with symptomatic brain cavernoma

**Health Economic Analysis Plan (HEAP)**

|                  |                                                  |
|------------------|--------------------------------------------------|
| Version No       | 1.0                                              |
| Date Finalised   | 7 February 2023                                  |
| Author(s)        | Alistair Bullen, Andrew Stoddart, Aileen Neilson |
| CI Name          | Prof Rustam Al-Shahi Salman                      |
| CI Email address | Rustam.Al-Shahi@ed.ac.uk                         |

| Signatures                                                                                                                        |                          |
|-----------------------------------------------------------------------------------------------------------------------------------|--------------------------|
| <br>Trial Lead Health Economist: Peter Hall    | Date:<br>7 February 2023 |
| <br>Chief Investigator: Rustam Al-Shahi Salman | Date:<br>7 February 2023 |

| Document Control |            |                                            |
|------------------|------------|--------------------------------------------|
| Version No       | Date       | Summary of Revisions                       |
| 1.0              | 22.11.2022 | Initial Creation by author Alistair Bullen |

Version No 1.0  
 Effective Date 7 February 2023

|  |  |  |
|--|--|--|
|  |  |  |
|--|--|--|

| Supporting Internal Documents  | Version No |
|--------------------------------|------------|
| CARE Protocol                  | 2.0        |
| CARE Statistical Analysis Plan | 1.0        |

For peer review only

1  
2  
3  
4  
5  
6  
7  
8  
9  
10  
11  
12  
13  
14  
15  
16  
17  
18  
19  
20  
21  
22  
23  
24  
25  
26  
27  
28  
29  
30  
31  
32  
33  
34  
35  
36  
37  
38  
39  
40  
41  
42  
43  
44  
45  
46  
47  
48  
49  
50  
51  
52  
53  
54  
55  
56  
57  
58  
59  
60

Version No 1.0  
Effective Date 7 February 2023

## Table of Contents

|                                                                                          |           |
|------------------------------------------------------------------------------------------|-----------|
| <b>List of Abbreviations .....</b>                                                       | <b>4</b>  |
| <b>1. Introduction .....</b>                                                             | <b>5</b>  |
| <b>2. Objectives and Overview of Economic Evaluation .....</b>                           | <b>5</b>  |
| <b>2.1. Overview of the Economic Evaluation .....</b>                                    | <b>5</b>  |
| <b>2.2. Primary Health Economic Objectives .....</b>                                     | <b>6</b>  |
| <b>2.3. Secondary Health Economic Objectives .....</b>                                   | <b>6</b>  |
| <b>3. Economic Principles .....</b>                                                      | <b>7</b>  |
| <b>3.1. Cost Perspective .....</b>                                                       | <b>7</b>  |
| <b>3.2. Time Horizon .....</b>                                                           | <b>7</b>  |
| <b>3.3. Discount Rates .....</b>                                                         | <b>7</b>  |
| <b>4. Data Collection &amp; Processing .....</b>                                         | <b>7</b>  |
| <b>4.1. Analysis Software .....</b>                                                      | <b>7</b>  |
| <b>4.2. Summary of Data Collection &amp; Follow up Timing .....</b>                      | <b>7</b>  |
| <b>4.2.1. Intervention .....</b>                                                         | <b>8</b>  |
| <b>4.3. Resource Use and Cost Calculations .....</b>                                     | <b>8</b>  |
| <b>4.3.1. Base Year and Unit Cost Selection .....</b>                                    | <b>8</b>  |
| <b>4.3.2. Cost Calculations .....</b>                                                    | <b>10</b> |
| <b>4.4. Health Outcomes .....</b>                                                        | <b>10</b> |
| <b>4.4.1. QALY Outcome Calculation .....</b>                                             | <b>10</b> |
| <b>5. Within Trial Analyses &amp; Reporting .....</b>                                    | <b>10</b> |
| <b>5.1. Scope of Analyses .....</b>                                                      | <b>10</b> |
| <b>5.2. Reporting Standards .....</b>                                                    | <b>11</b> |
| <b>5.3. List of Analyses .....</b>                                                       | <b>11</b> |
| <b>5.4. Assessment of Data Quality .....</b>                                             | <b>12</b> |
| <b>6. Modelling .....</b>                                                                | <b>12</b> |
| <b>6.1. Existing Model .....</b>                                                         | <b>13</b> |
| <b>6.2. Assessment of Model Parameters for use in Current and Future Modelling .....</b> | <b>13</b> |
| <b>6.3. Dry Run Analysis .....</b>                                                       | <b>14</b> |
| <b>6.3.1. Outcomes .....</b>                                                             | <b>14</b> |
| <b>6.4. Results .....</b>                                                                | <b>15</b> |
| <b>7. References .....</b>                                                               | <b>15</b> |

Version No 1.0  
Effective Date 7 February 2023

## List of Abbreviations

| Abbreviation | Full Name                                                   |
|--------------|-------------------------------------------------------------|
| CCM          | Cerebral Cavernous Malformations                            |
| CEAC         | Cost Effectiveness Acceptability Curve                      |
| CHEERS       | Consolidated Health Economic Evaluation Reporting Standards |
| CT           | Computerized Tomography                                     |
| ECTU         | Edinburgh Clinical Trials Unit                              |
| EQ-5D-5L     | Euroqol Quality of Life Survey [5 Dimension, adult version] |
| EQ-5D-Y      | Euroqol Quality of Life Survey [3 Dimension, child version] |
| FND          | Focal Neurological Deficit                                  |
| GP           | General Practitioner                                        |
| HCRU         | Healthcare Resource Utilisation                             |
| HEAP         | Health Economic Analysis Plan                               |
| ICER         | Incremental Cost Effectiveness Ratio                        |
| ICH          | Intracerebral Haemorrhage                                   |
| MRI          | Magnetic Resonance Imaging                                  |
| NHS          | [The UK] National Health Service                            |
| NICE         | [The] National Institute for [Health and] Care Excellence   |
| ONS          | Office of National Statistics                               |
| PSA          | Probabilistic Sensitivity Analysis                          |
| POD          | Post-Operative Day                                          |
| QALY         | Quality Adjusted Life Year                                  |
| SAP          | Statistical Analysis Plan                                   |
| UK           | United Kingdom                                              |

|                |                 |
|----------------|-----------------|
| Version No     | 1.0             |
| Effective Date | 7 February 2023 |

## 1. Introduction

This document details the criteria to be used for the definition of the analysis populations and the health economic methods for analysis of CARE (Trial Registration: ISRCTN Number: 41647111); Trial Funding: National Institute for Health and Care Research (NIHR) Health Technology Assessment (project no. 128694), a two-arm, parallel group randomised feasibility trial which aims to estimate the feasibility of performing a definitive main phase randomised controlled trial (RCT) comparing medical management to medical and surgical management (with neurosurgery or Gamma Knife stereotactic radiosurgery, according to their availability in clinical practice) for improving outcomes for people with symptomatic brain cavernoma.

The aim is to randomise approximately 60 participants (from sites in the UK and Ireland) to groups in a 1:1 ratio, to medical management alone, or medical and surgical management, stratified by preferred type of surgical management. If there is no clear preference for the type of surgical management, and both are available, the patient will be randomly allocated to either neurosurgery or stereotactic radiosurgery, and then randomised between medical management alone, or medical and surgical management (detailed in section 3.1 of the trial protocol).

The pilot phase of CARE will be submitted for publication and reported according to the CONSORT 2010 extension to randomised pilot and feasibility trials.

The strategy set out here to guide the CARE health economic analyses, is intended to establish the rules that will be followed as closely as possible, when analysing and reporting the CARE trial health economic analyses. The principles set out here follow current published best practice for trial based economic assessments and recommended guidance regarding the content of the HEAPs for clinical trials.[1] This HEAP document has been written based on information contained in the trial protocol version 2.0, dated 22<sup>nd</sup> March 2021, and Statistical Analysis Plan (SAP) version 1.0, 12/12/2022. The HEAP is designed to ensure that there is no conflict with the protocol and associated statistical analysis plan and it should be read in conjunction with them.

Any deviations from the health economic analysis plan (described in this document) will be detailed and justified fully in the final report of the trial.

## 2. Objectives and Overview of Economic Evaluation

### 2.1. Overview of the Economic Evaluation

We aim to pilot the data collection methods for the CARE trial, and their assess suitability for use in a future full-scale trial providing descriptive statistics only, and an assessment of the completeness of surveys.

|                |                 |
|----------------|-----------------|
| Version No     | 1.0             |
| Effective Date | 7 February 2023 |

If suitable, we aim to adapt an existing decision analytic Markov health economic model by Rinkel et al, which presently only models QALYs, to further include costs enabling full economic evaluation to be conducted.[2] We plan to assess the appropriateness of each parameter in the model, augmenting with trial data as necessary and where possible, making recommendations for future use or development in a full-scale trial. If deemed viable, we will then undertake a dry run of the updated model using the updated parameters by way of proof of concept, to provide highly provisional cost-utility estimates based on NICE reference case recommendations and estimate plausible ranges of incremental costs and QALYs and understand the main driver parameters within the model.[3]

The broader aim is to support the case for a full scale RCT in the setting that has the potential to identify the most cost-effective solution for clinical practice that can improve resource allocation efficiency in order to maximise the benefits provided by the NHS.

## 2.2. Primary Health Economic Objectives

The primary health economic objectives as defined in the CARE protocol are:

1. Design and test optimal methods for capture of resource use and cost data in community NHS settings, NHS secondary care, participants' out of pocket expenses and carer costs.
2. Estimate expected effect size and variance of relevant outcomes including health-related quality of life (utility) and quality-adjusted life years (QALYs)
3. Identify and measure the potential cost implications of surgical management of cavernomas.

These relate to and comprise of the within-trial analysis component of the study, which focuses on assessment of the quality of data collected during the observed follow-up period of the trial.

## 2.3. Secondary Health Economic Objectives

The secondary objective of the health economics analysis are:

4. To test the effect of updated parameters informed by the results of the primary health economic analysis on a previously published decision analytical model in the same setting.[2]
5. Provide recommendations for revisions to the model to aid future definitive trial design.

These relate to and comprise of the modelled analysis component of the study, which focuses on assessment of the feasibility of simulating longer term outcomes, beyond those of the observable trial period.

|                |                 |
|----------------|-----------------|
| Version No     | 1.0             |
| Effective Date | 7 February 2023 |

### 3. Economic Principles

#### 3.1. Cost Perspective

The primary perspective for analysis is the healthcare payer (NHS) perspective. Secondary analyses include wider societal perspective which includes some personal costs borne by patients as well as community care costs.

#### 3.2. Time Horizon

Time horizon for within-trial elements of the analysis will be 18 months, reflecting the observed time frame from baseline to last follow-up. Time horizon for economic modelling will be 5 years, to include the simulated extrapolation beyond the observed trial time horizon, match the time period used by the original model, and to facilitate meaningful comparisons between original and adapted (CARE) models.

#### 3.3. Discount Rates

Base-case discount rates will be set to 3.5% for both costs and outcomes, following the NICE reference case recommendations.[3]

### 4. Data Collection & Processing

#### 4.1. Analysis Software

The primary within trial analyses (Objectives 1 to 3) will be performed on STATA 17.[4] Secondary analysis re-purposing an existing decision analytical model (Objectives 4 and 5) is expect to be completed on R Studio.[5] Additional analysis may also be completed on Microsoft Excel and TreeAge.[6,7]

#### 4.2. Summary of Data Collection & Follow up Timing

Table 1 presents data collection for items and corresponding time points relating specifically to the within trial health economics analysis. Patient utility values will be collected using the EQ-5D-5L measure for adults[8] and EQ-5D-Y[9,10] measure in children. Healthcare resource use and socioeconomic data will also be collected from information gathered in the form of participant self-reported questionnaires.



|                |                 |
|----------------|-----------------|
| Version No     | 1.0             |
| Effective Date | 7 February 2023 |

**Table 1: Summary of Health Economic Data Collection based on baseline and follow-up**

| Item                                  | Time since baseline |         |           |          |
|---------------------------------------|---------------------|---------|-----------|----------|
|                                       | Baseline            | 6-month | 12 -month | 18 month |
| <b><u>Health Utility data</u></b>     |                     |         |           |          |
| EQ-5D-5L (adults only)                | ✓                   | ✓       | ✓         | ✓        |
| EQ-5D-Y (children only)               | ✓                   | ✓       | ✓         | ✓        |
| <b><u>Socioeconomic data*</u></b>     |                     |         |           |          |
| Employment data                       | ✓                   | ✓       | ✓         | ✓        |
| Education data                        | ✓                   | ✓       | ✓         | ✓        |
| Informal Care data                    | ✓                   | ✓       | ✓         | ✓        |
| <b><u>Healthcare Resource Use</u></b> |                     |         |           |          |
| In-patient stays                      |                     | ✓       | ✓         | ✓        |
| Out-patient service use               |                     | ✓       | ✓         | ✓        |
| Hospital tests                        |                     | ✓       | ✓         | ✓        |
| Community and primary care            |                     | ✓       | ✓         | ✓        |

\* number of days lost due ill health, days of care provided by family and friends

#### 4.2.1. Intervention

A case report form (CRF) is completed after the intervention, with data collected depending on the intervention performed (neurosurgical excision or stereotactic radiosurgery). Date of hospital admission and discharge for surgical management are collected for both interventions, and for patients who receive neurosurgical excision the type of ward attended (e.g. Adult, Paediatric, Neurology/Neurosurgery ,Other) is recorded. This information will be used to guide the selection of appropriate unit costs (from standard UK published literature sources) to assign to each type of surgical management intervention. We will also consult with relevant NHS service business managers as an alternative information source to estimate the costs associated with the different surgical treatment options.

### 4.3. Resource Use and Cost Calculations

#### 4.3.1. Base Year and Unit Cost Selection

Base year for all costs will be selected as the latest financial year for which price weight reports are available at time of analysis and at least one patient provided data. A unit cost (in GBP) for each item for this base year will be sourced prior to analysis. As additional unit cost sources may be published

|                |                 |
|----------------|-----------------|
| Version No     | 1.0             |
| Effective Date | 7 February 2023 |

by time of analysis, unit costs will be identified close to time of analysis, prior to unblinding, and detailed in an updated HEAP signed off by PH & RASS. Table 2 below details the variables recorded in the relevant CRF, associated cost category, and anticipated sources for unit costs to be prioritised for each item. Alternatives unit costs maybe sourced for those unavailable or not deemed generalisable to the trial population/context at time of analysis.

**Table 2: Summary of costs and expected correspond sources.**

| Item                                                                         | Units                              | Anticipated Source*                        |
|------------------------------------------------------------------------------|------------------------------------|--------------------------------------------|
| <b><u>Direct Intervention Related Costs (In-Patient Hospitalisation)</u></b> |                                    |                                            |
| Neurosurgical excision                                                       |                                    | NHS Reference costs[11]                    |
| Stereotactic excision                                                        |                                    | NHS Reference costs[11]                    |
| Adult ward in-patient stay (Post neurosurgical excision)                     | Per night                          | NHS Reference costs[11]                    |
| Paediatric ward in-patient stay (Post neurosurgical excision)                | Per night                          | NHS Reference costs[11]                    |
| Neurology/Neurosurgery ward in-patient stay (Post neurosurgical excision)    | Per night                          | NHS Reference costs[11]                    |
| Other ward in-patient stay (Post neurosurgical excision)                     | Per night                          | NHS Reference costs[11]                    |
| <b><u>In-patient Hospital Services</u></b>                                   |                                    |                                            |
| Hospital in-patient stay                                                     | Per night                          | NHS Reference costs[11]                    |
| Other unscheduled hospital or A&E attendance                                 | Per attendance                     | NHS Reference costs[11]                    |
| <b><u>Out-patient Hospital Service</u></b>                                   |                                    |                                            |
| Neurologist service                                                          | Per clinic/phone consultation      | NHS Reference costs[11]                    |
| Surgeon service                                                              | Per clinic/phone consultation      | NHS Reference costs[11]                    |
| Specialist nurse service                                                     | Per clinic/phone consultation      | NHS Reference costs[11]                    |
| <b><u>Hospital Tests</u></b>                                                 |                                    |                                            |
| MRI Scan                                                                     | Per clinic/phone consultation      | NHS Reference costs[11]                    |
| CT Scan                                                                      | Per clinic/phone consultation      | NHS Reference costs[11]                    |
| <b><u>Community and Primary Care Services</u></b>                            |                                    |                                            |
| GP surgery (doctor)                                                          | Per clinic/phone consultation      | PSSRU[12]                                  |
| GP surgery (nurse)                                                           | Per clinic/phone/home consultation | PSSRU[12]                                  |
| NHS 24/111                                                                   | Per clinic/phone/home consultation | Pope et al. [13]                           |
| Out of hours GP                                                              | Per clinic/phone/home consultation | PSSRU[12]                                  |
| District nurse                                                               | Per clinic/phone/home consultation | PSSRU[12]                                  |
| Nurse (other)                                                                | Per clinic/phone/home consultation | PSSRU[12]                                  |
| Psychologist                                                                 | Per clinic/phone/home consultation | PSSRU[12]                                  |
| Physiotherapist                                                              | Per clinic/phone/home consultation | PSSRU[12]                                  |
| Dietician                                                                    | Per clinic/phone/home consultation | PSSRU[12]                                  |
| Occupational therapist                                                       | Per clinic/phone/home consultation | PSSRU[12]                                  |
| <b><u>Employment and Support (Indirect Costs)</u></b>                        |                                    |                                            |
| Productivity losses (patient time off work due to health problems)           | Per day                            | National average wage according to ONS[14] |

|                |                 |
|----------------|-----------------|
| Version No     | 1.0             |
| Effective Date | 7 February 2023 |

Productivity losses (informal carers time off work to support/help patient) Per day National average wage according to ONS[14]

\* Where a given item has multiple consultation types (e.g. clinic/phone/home), separate unit costs will be identified for each.

### 4.3.2. Cost Calculations

Each item of resource use will be multiplied by its unit cost to estimate a cost per patient, plus a total cost over all follow-up time points. This will be undertaken separately for each trial arm.

The following total cost categories will be calculated:

1. Mean per patient NHS costs will be calculated as the sum of mean cost per patient pertaining to direct intervention, in-patient hospital services, out-patient hospital service, hospital tests, and utilisation of community and primary care services.
2. Mean per patient wider societal costs will be calculated as the sum of mean cost per patient pertaining to NHS costs (as per 1.) plus lost income from days taken off of work by patients and informal carers.

### 4.4. Health Outcomes

#### 4.4.1. QALY Outcome Calculation

Following NICE guidance, health utilities will be calculated for each patient based on their EQ-5D-5L or EQ-5D-Y at each time point if they were issued, and derived using the recommended UK EQ-5D-5L to 3L “Crosswalking” algorithm,[15] or based on sensitivity analysis between possible alternative scoring algorithms for the UK EQ-5D-Y.

QALYs will be calculated from these health utility values using an area-under-the-curve technique.[16]

## 5. Within Trial Analyses & Reporting

### 5.1. Scope of Analyses

We only aim to assess the suitability of the data collected for use in a future trial, and/or economic model. As such, calculations of incremental cost-effectiveness Ratios (ICERs) will not be undertaken on the within trial proportion of the analysis. Some preliminary calculations may however be undertaken as part of the modelling proportion of the sub study, see section 6. The main outputs from the within trial analysis will instead be the expected effect size and variance of relevant outcomes including health related quality of utility, QALYs, and cost factors.

|                |                 |
|----------------|-----------------|
| Version No     | 1.0             |
| Effective Date | 7 February 2023 |

All analyses will be based on the intention to treat (ITT) principle with patients analysed according to allocated treatment, irrespective of whether they adhered to the allocated treatment, in the group to which they were allocated.

## 5.2. Reporting Standards

Results will be presented in accordance to guidance set out in the Consolidated Health Economic Evaluation Reporting Standards (CHEERS).[17]

## 5.3. List of Analyses

As CARE is a pilot trial, only descriptive statistics will be provided with no formal statistical significance tests.

Completeness of the following outcomes will be summarised for each time point (6, 12 and 18 months) and each trial arm, with completion defined as the number and percentage of responses from participants that should have been reached at that time point.

- i. Each resource use item listed in Table 2 (see section 4.3.1)
- ii. Each EQ-5D-5L or EQ-5D-Y sub-scale (Mobility, Self-Care, Usual-Activities, Pain and Discomfort, and Anxiety and Depression).

The following outcomes will be reported for each trial arm:

- iii. Mean rates of utilisation per patient, and associated standard deviation of each resource use item listed in Table 2 (see section 4.3.1), at each time point (6, 12 and 18 months) and total over all time points.
- iv. Mean cost (calculated as per section 4.3.2) of each resource use item listed in Table 2 (see section 4.3.1) per patient and associated standard deviation totalled over all time points.\*
- v. Mean total costs (calculated as per section 4.3.2) per patient for each category of cost.\*
- vi. Mean utility scores (calculated as per section 4.4.1) per patient and associated standard deviation at each time point (6, 12 and 18 months).
- vii. Mean QALYs per patient (calculated as per section 4.4.1) and associated standard deviation.\*

\* Cost and QALY figures (Outcomes iv., v., and vii.) may be calculated accounting for missing data e.g. through imputation, with the selection of a specific method being informed by the quantity and pattern of missingness present and , subject to data quality assessment (see Section 5.4).

Subject to data quality (See Section 5.4), regression analyses adjusting for baseline may be explored for total costs and QALYs (Outcomes v. and vii.).

Subgroup analysis (for items i-vii above) considering age-group (adults vs children) and by intervention type (neurosurgery or stereotactic radiosurgery) will also be conducted subject to adequate numbers

|                |                 |
|----------------|-----------------|
| Version No     | 1.0             |
| Effective Date | 7 February 2023 |

being available. Finally, costs related to the specific health states defined in the previously developed QALYs (only) model by Rinkel et al (see section 6.1 below) will be reported if identifiable from the pilot data collected.

#### 5.4. Assessment of Data Quality

A qualitative assessment of missingness and data quality pertaining to the health economic analysis, from outcomes i. and ii. In Section 5.3., will be produced by the health economics team. Analysts will provide an expert assessment of the data quality with respect to:

- Suitability for use in future definitive trials in light of larger sample sizes.
- Adaptation for use in parameters of the economic modelling in Section 6, and any similar modelling alongside a hypothetical definitive future trial in light of larger sample sizes.

We will also make recommendations around appropriate forms of imputation that may be necessary in future trials. QALY and total cost calculations are composite variables by their nature. As such even single missing items on any resource or utility observation at any time point can render a participants QALY or total cost figures incalculable, without some form of imputation. Assessment of data quality will include consideration of what form of imputation may be necessary in a future main phase definitive trial. However as the regressions needed for more advanced imputation techniques would be underpowered, at most, simple mean imputation may be applied at the analysts discretion.

## 6. Modelling

Subject to data quality assessment (see Sections 5.4, and 6.2), an existing model by Rinkel et al[2] will be rebuilt, and adapted to incorporate trial data. The latter being important in order to add cost elements in particular, as the existing model simulates effectiveness in terms of QALYs only.

The purpose of the model will be to:

1. Create a model structure for potential adaptation and reuse alongside future definitive trial.
2. Undertake a proof of concept dry run analysis to identify any issues in the model and make recommendations for adaptation for use in any future definitive trial.
3. If data quality are suitable, provide highly provisional early estimates of cost-utility of medical management alone vs medical and surgical management (with neurosurgery or Gamma Knife stereotactic radiosurgery, according to their availability in clinical practice) for the treatment of symptomatic brain cavernoma.

|                |                 |
|----------------|-----------------|
| Version No     | 1.0             |
| Effective Date | 7 February 2023 |

To maximise UK policy relevance, this adaptation will follow NICE reference case recommendations[3] where possible including: Adoption of an NHS and PSS (personal social service) costing perspective for primary analyses; cost-utility approach (results presented in terms of incremental cost per QALY derived from EQ-5D-5L); discount rate of 3.5% for both costs and QALYs; and the use of probabilistic sensitivity analysis (PSA), to generate cost effectiveness acceptability curves (CEACs).[18] Any exceptions to reference case methodology will be noted and justified. Time horizon for analysis will be 5 Years (see Section 3.2).

### 6.1. Existing Model

A model schematic, including diagrams, parameter estimates and sources, and modelling assumptions can be found in the technical appendix to Rinkel et al.[2] By way of overview, the model compares three treatment arms (Conservative Management, Stereotactic radiosurgery, and neurosurgical excision) using a 5 year Markov model, with 3 primary health states (Well, Disabled and Death). Well and Disabled health states are subdivided into proportions with about without seizures and/or ICH. The model simulated three cohorts: (patients with brainstem cerebral cavernous malformations(CCM), patients with non-brainstem CCM presenting with intracerebral haemorrhage (ICH)/ focal neurological deficit FND, and patients presenting with epilepsy. Model parameters are populated using systematic review of published studies of CCM from the inception of Medline and Embase to December 2016. Primary outcomes from the model are expected number of QALYs, and ICH recurrence risk.

### 6.2. Assessment of Model Parameters for use in Current and Future Modelling

A table of model parameters will be generated detailing:

- a. The parameter name and description.
- b. Desired statistical distribution for the parameter for use in a Method of Moments approach to enable PSA.[19]
- c. Candidate values and sources (trial data, or existing model) where available. Where multiple sources are identified, each will be listed.
- d. A qualitative expert assessment of the suitability of the available source(s), accounting for generalisability to patient population and context, and a statement of which parameter is preferred (where a choice exists), for (i) current modelling utilising pilot data, and (ii) future modelling utilising data from a hypothetical future definitive scale trial. Note that it is possible that recommendations for current modelling source prioritisation may differ due to expected larger sample sizes in a future trial.

Results for d. may be reported as body text if the discussion is too large to be included in the table.

|                |                 |
|----------------|-----------------|
| Version No     | 1.0             |
| Effective Date | 7 February 2023 |

A qualitative expert assessment in the form of a short interim report of the model structure as a whole will then be undertaken highlighting any areas of weakness, with a focus on parameters which may not be suitable from either source (existing model or trial data) and with recommendations for future literature reviews which may be needed to populate them if necessary. Such reviews may be undertaken, subject to available time, at the analysts discretion.

### 6.3. Dry Run Analysis

Subject to suitability of available parameters, the model[2] will be rebuilt in R and RStudio[5] with the addition of cost parameters linked to key health states and transitions. The model will be parameterised applying the recommendations for best current available data from the interim report generated by process described in Section 6.2.

Any adaptation to the model structure from that of the original which arise as necessary during the models development will be noted and justified, with a new model schematic diagram generated.

#### 6.3.1. Outcomes

Outcomes for the model will be:

- A. Mean QALYs per patient for each trial arm, and difference in mean QALYs per patient between trial arms (intervention minus control). Note that the method for calculating QALYs will depend on data available (see Section 6.2, though preference will be given to calculation via NICE recommended[3] EQ-5D utilities where available)
- B. Mean NHS cost per patient for each trial arm, and difference in mean NHS cost per patient between trial arms (intervention minus control).
- C. ICER(s) in terms of incremental cost per QALY (intervention vs control, calculated as [A]/[B] above).[16,19]
- D. A CEAC, generated via PSA utilising a method of moments approach[19], with point estimates of likelihood of each arm being the most cost-efficient at NICE recommended thresholds of £20k, and £30k per QALY.

Note we will not undertake value of information analysis (VoI) as this assumes all data to be generalisable to the patient population and context, and we do not anticipate this to be the case. However, we will conduct a limited range of deterministic and probabilistic (one-way) sensitivity analysis in order to help understand the influence and implications of important model input parameters.

|                |                 |
|----------------|-----------------|
| Version No     | 1.0             |
| Effective Date | 7 February 2023 |

#### 6.4. Results

Outcomes A – D in section 6.3.1 will be reported, however these are expected to carry strong caveats that they are provisional results only.

A short report summarising the findings from Section 6.3.1 and experiences developing and running the model will be created by the analyst, with support from senior health economists, which will provide recommendations for developments for the model for use alongside any future definitive trial such as:

- Changes to model structure.
- Alternative data sources for parameterisation (Including need for literature reviews(s)).
- Any concerns about the model, or matters arising in its development so far.

#### 7. References

1. Thorn JC, Davies CF, Brookes ST, Noble SM, Dritsaki M, Gray E, et al. Content of Health Economics Analysis Plans (HEAPs) for trial-based economic evaluations: expert Delphi consensus survey. *Value Health*. 2021;24(4):539– 47.
2. Rinkel LA, Salman RAS, Rinkel GJ, and Greving JP. Radiosurgical, neurosurgical, or no intervention for cerebral cavernous malformations: a decision analysis. *International Journal of Stroke*. 2019; 14(9), pp.939-945.
3. National Institute of Health and Care Excellence. NICE Health Technology Evaluations: The Manual. NICE 2022.
4. StataCorp. 2021. Stata Statistical Software: Release 17. College Station, TX: StataCorp LLC.
5. RStudio Team (2020). RStudio: Integrated Development for R. RStudio, PBC, Boston, MA URL <http://www.rstudio.com/>.
6. Microsoft Corporation. Microsoft Excel [Internet]. 2018. Available from: <https://office.microsoft.com/excel>
7. TreeAge Pro 2021, R1. TreeAge Software, Williamstown, MA; software available at <http://www.treeage.com>.
8. Herdman M, Gudex C, Lloyd A, Janssen M, Kind P, Parkin D, et al. Development and preliminary testing of the new five-level version of EQ-5D (EQ-5D-5L). *Qual Life Res*. 2011, Vol. 20, 10, pp. 1727-1736.
9. Wille N, Badia X, Bonsel G, Burström K, Cavrini G, Devlin N et al. Development of the EQ-5D-Y: a child-friendly version of the EQ-5D. *Qual Life Res* 2010;19:875–886. 10.
10. Ravens-Sieberer U, Wille N, Badia X, Bonsel G, Burström K, Cavrini G, et al. Feasibility, reliability, and validity of the EQ-5D-Y: results from a multinational study. *Qual Life Res* 2010;19:887–897.
11. Department of Health, The. Reference Costs Publications. The Department of Health 2021. <https://www.gov.uk/government/collections/nhs-reference-costs>



Version No 1.0  
Effective Date 7 February 2023

12. Curtis L. Unit Costs of Health & Social Care 2021. Kent: Personal Social Services Research Unit 2021.
13. Pope C, Turnbull T, Jones J, Prichard J, Rowsell A, and Halford S. Has the NHS 111 urgent care telephone service been a success? Case study and secondary data analysis in England. *BMJ Open* 2017; 7:e014815. doi: 10.1136/bmjopen-2016-014815.
14. Office of National Statistics. <https://www.ons.gov.uk/>
15. Van Hout B, Janssen M, Feng Y et al. Interim scoring for the EQ 5D 5L: Mapping the EQ 5D 5L to EQ 5D 3L value sets. *Value in Health*. 2012; 15: 708-15.
16. Drummond MF, Sculpher MJ, Claxton K, Stoddart GL, and Torrance GW. *Methods for the Economic Evaluation of Health Care Programmes*. Oxford: Oxford University Press, 2015.
17. Husereau D, Drummond M, Petrou S, Carswell C, Moher D, Greenberg D, et al. Consolidated health economic evaluation reporting standards (CHEERS)-explanation and elaboration: a report of the ISPOR health economic evaluation publication guidelines good reporting practices task force. *Value Health*. 2013;16:231–50.
18. Glick HA, Doshi DA, Sonnad SS, and Polsky D. *Economic Evaluation in Clinical Trials*. Oxford: Oxford University Press, Incorporated, 2014.
19. Briggs A, Sculpher M, and Claxton K. *Decision Modelling for Health Economic Evaluation*. Oxford: Oxford University Press, Incorporated, 2006.

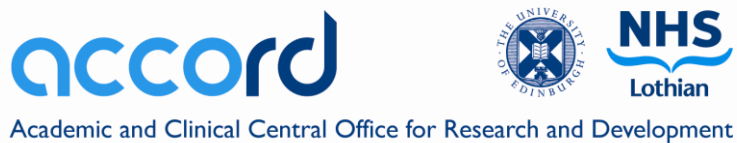

## CARE Trial Data Monitoring Committee Charter

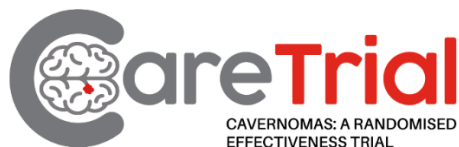

|                                         |                                                                                                                                                                                                                                       |
|-----------------------------------------|---------------------------------------------------------------------------------------------------------------------------------------------------------------------------------------------------------------------------------------|
| <b>Study Title:</b>                     | Cavernomas A Randomised Effectiveness (CARE) pilot trial, to address the effectiveness of active treatment (with neurosurgery or stereotactic radiosurgery) versus conservative management in people with symptomatic brain cavernoma |
| <b>Funder and funder reference:</b>     | National Institute for Health Research Health Technology Assessment Programme - NIHR128694                                                                                                                                            |
| <b>Chief Investigator:</b>              | Prof Rustam Al-Shahi Salman                                                                                                                                                                                                           |
| <b>Co-Sponsors:</b>                     | University of Edinburgh & NHS Lothian                                                                                                                                                                                                 |
| <b>Sponsor reference:</b>               | AC20171                                                                                                                                                                                                                               |
| <b>Trial Registration Reference(s):</b> | ISRCTN41647111                                                                                                                                                                                                                        |
| <b>REC reference:</b>                   | 21/YH/0046                                                                                                                                                                                                                            |
| <b>Charter Version Number and Date:</b> | V2.0 (24Jan2023)<br><i>Based on sponsor template CR015-T01 v3.0</i>                                                                                                                                                                   |





## Table of Contents

|    |                                                                                             |    |
|----|---------------------------------------------------------------------------------------------|----|
| 1  | Introduction .....                                                                          | 4  |
| 2  | Roles and Responsibilities .....                                                            | 4  |
| 3  | Before or early in the trial .....                                                          | 5  |
| 4  | Composition .....                                                                           | 6  |
| 5  | Relationships .....                                                                         | 6  |
| 6  | Organisation of DMC Meetings .....                                                          | 7  |
| 7  | Trial Documentation and Procedures to Ensure Confidentiality and Proper Communication ..... | 8  |
| 8  | Decision Making .....                                                                       | 9  |
| 9  | Reporting .....                                                                             | 10 |
| 10 | After the Trial .....                                                                       | 11 |



## 1 Introduction

This Charter is for the Data Monitoring Committee (DMC) for the Cavernomas A Randomised Effectiveness (CARE) pilot trial, a pilot randomised controlled trial (RCT) which aims to assess the feasibility of conducting a definitive main phase RCT to address the research question "How effective is active treatment (with neurosurgery or stereotactic radiosurgery) versus conservative management in people with symptomatic brain cavernoma?". The trial objectives are to:

1. Engage a collaboration of specialists and patient advocacy groups in the UK and Ireland.
  2. Establish a pilot RCT, with an embedded qualitative study to understand the anticipated recruitment processes and address any barriers.
- Assess the feasibility of performing a definitive main phase of the RCT.

The Charter will define the primary responsibilities of the Data Monitoring Committee (DMC) for the CARE pilot trial, its membership, and the purpose and timing of its meetings. The Charter will also provide the procedures for ensuring confidentiality and proper communication, the statistical monitoring guidelines to be implemented by the DMC, and an outline of the content of the Open and Closed Reports that will be provided to the DMC.

The trial will be conducted in accordance with sponsor SOPs:  
(<https://www.accord.scot/research-access/resources-researchers/sop>).

The contents of the Charter are based on the NIHR Research Governance Guidelines for Data Monitoring Committees:  
(<https://www.nihr.ac.uk/documents/research-governance-guidelines/12154>).

## 2 Roles and Responsibilities

The DMC is an independent multidisciplinary group consisting of clinicians and statisticians that, collectively, have experience/expertise in the management of patients with the condition relevant to trial and in the conduct and monitoring of randomised clinical trials. University of Edinburgh insurance indemnifies DMC members for their work on the committee.

The specific roles of the DMC include:

- The DMC will be responsible for:
  - Safeguarding the interests of trial participants, potential participants, investigators and sponsor, ensuring that the safety, rights and well-being of the trial participants are paramount
  - Assessing the safety and efficacy of the interventions during the trial, with due allowance for this being a feasibility study
  - Reviewing external evidence with an impact on risk/benefit balance, with due allowance for this being a feasibility study



- Monitoring the overall conduct of the clinical trial
- The DMC will provide recommendations about stopping, modifying or continuing the trial to the Trial Steering Committee (TSC).
- The DMC will contribute to enhancing the integrity of the trial, and may also formulate recommendations relating to the selection, recruitment, or retention of participants, or their management, or to improving their adherence to protocol-specified regimens and retention of participants, and the procedures for data management and quality control.
- The DMC will consider the need for any interim analysis advising the TSC regarding the release of data and/or information
- On rare occasions when the DMC chair might be asked, through the chair of the TSC, by the Funder to provide advice based on a confidential interim or futility analysis if serious concerns are raised about the viability of the study or if the research team are requesting significant extensions, but this is unlikely in a feasibility setting.
- The DMC will be notified of all changes to the protocol or to study conduct. The DMC concurrence will be sought on all substantive recommendations or changes to the protocol or study conduct prior to their implementation.

### 3 Before or early in the trial

All potential DMC members will have sight of the protocol before the first DMC meeting. Before recruitment begins, the trial will have undergone review by the sponsor and a research ethics committee. Therefore, if a potential DMC member has major reservations about the trial (e.g. the protocol or the logistics) they should report these to the CI and may decide to decline the invitation to join. DMC members should be constructively critical of the ongoing trial, but also supportive of aims and methods of the trial.

The DMC will aim to meet before or close to the start of recruitment to the trial, to discuss the protocol, methods of providing information to and from the DMC, frequency and format of meetings, relationships with other committees and have the opportunity to clarify any aspects with the CI and Co-Chief Investigator. DMC input into the protocol will be discussed with the CI before deciding what protocol updates need to be implemented.

Members and observers of the DMC will not be asked to formally sign a contract but should formally register their assent by confirming (1) that they agree to be a member of the DMC and (2) that they agree with the contents of this Charter by signing and dating the required form (Appendix 1).

## 4 Composition

DMC members were selected and approved by the funder in accordance with NIHR Research Governance Guidelines (V1.0 February 2019).

The **members** of the DMC are listed below.

| Name of Member      | Role in DMC        | Responsibility                              |
|---------------------|--------------------|---------------------------------------------|
| Dr John Bamford     | Independent Chair  | Provide independent neurological expertise  |
| Prof David Mendelow | Independent member | Provide independent neurosurgical expertise |
| Mr Nigel Baker      | Independent member | Provide independent statistical expertise   |

In addition, the following individuals will also be involved in DMC meetings:

| Name                        | Trial Role                  | Responsibility                                |
|-----------------------------|-----------------------------|-----------------------------------------------|
| Prof Rustam Al-Shahi Salman | Chief Investigator          | Inform DMC of any relevant updates            |
| Mr Neil Kitchen             | Co-chief investigator       | Neurosurgical lead                            |
| Prof Steff Lewis            | Statistician                | Blinded trial statistician                    |
| Ms Jacquie Stephen          | Statistician                | Unblinded trial statistician                  |
| Dr Laura Forsyth            | Trial Manager / Facilitator | Co-ordinate meetings and facilitate the group |

See section 7 for more information on the roles of the blinded and unblinded trial statisticians.

DMC membership is normally for the duration of the trial. If any member leaves the DMC during the course of the trial, the Sponsor, in consultation with the TSC and/or Investigators will promptly appoint their replacement.

## 5 Relationships

### DMC/ TSC relationship

The primary DMC reporting line is via the Chair to the TSC. The DMC will be advisory to the TSC. The TSC will be responsible for promptly reviewing the DMC recommendations, to decide whether to continue or terminate the trial, and to determine whether amendments to the protocol or changes in study conduct are required.

### Payments to DMC members

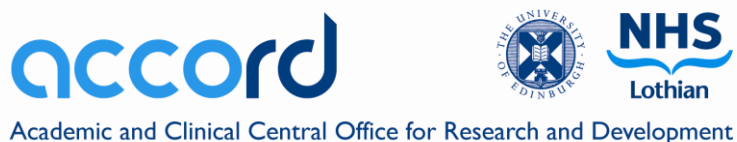

If required, standard travel and accommodation costs will be paid to members of the DMC. No other payments or rewards will be given.

### **Competing Interests**

Any competing interests, either real or potential, should be disclosed before DMC meetings (see Appendix 1). These are not restricted to financial matters, involvement in other trials or intellectual investment could be relevant. Although members may well be able to act objectively despite such connections, complete disclosure enhances credibility.

## **6 Organisation of DMC Meetings**

### **Meeting Frequency**

Responsibility for calling and organising DMC meetings lies with the Chief Investigator, in association with the Chair of the DMC, who will be assisted by the Trial Manager/Facilitator. The DMC should meet at least annually, or more often as appropriate, and meetings should be timed so that reports can be fed into the TSC.

### **Meeting Format and Attendance**

Sessions involving only DMC membership (but often including the unblinded statistician as well, as a non-voting member) called Closed Sessions will be held to allow discussion of confidential data from the clinical trial, including information about the relative efficacy and safety of interventions. In order to ensure that the DMC will be fully informed in its primary mission of safeguarding the interest of participating patients, the DMC will be unblinded in its assessment of safety and efficacy data. During these sessions, the DMC will develop a consensus on its list of recommendations, including that relating to whether the trial should continue. Attendance at DMC meetings by non-members is at the discretion of the Chair

DMC members and all other participants in the closed session of DMC meetings and the production of unblinded reports are expected to maintain confidentiality, and will refrain from revealing to the Trial Steering Committee, or any other party, information that would lead to compromising the integrity of the trial unless such release is required to protect patient safety.

In order to allow the DMC to have adequate access to information provided by the trial investigators, or by members of the regulatory authorities, a joint session between these individuals and DMC members (called an Open Session) will be held before the Closed Session. The trial Chief Investigator, Trial Statistician and Trial Manager will be available in-person or by phone for an open session at the beginning of the meeting, and will be available at the end of the meeting to answer any urgent questions. If necessary, a further Open Session can be held, on request either in the middle or end of the Closed Session. Open sessions give the DMC an opportunity to query these individuals about issues that have arisen during their review in the initial Closed Session. With this format, important interactions are facilitated through which problems affecting trial integrity can be identified and resolved.

Effort will be made to ensure that all members can attend. The CI must try to attend





all meetings, especially if major actions are expected. In the case of face to face meetings, members who cannot attend in person will be encouraged to participate by teleconference/videoconference. If DMC members cannot attend meetings by tele-/video-conference, they will be encouraged to send comments in advance via email.

Meetings will be held either in person, by video-conference (e.g. Zoom, MS Teams) or by teleconference. Major trial issues may need to be dealt with between meetings, by phone, video-conference or by email. DMC members should be prepared for such instances. There may be occasions when the Sponsor or the Funder will wish to organise and administer these meetings for particular projects. This is unlikely, but the NIHR reserves the right to attend any meeting therefore should be included in relevant invitations and also reserves the right to convene a meeting of the TSC in exceptional circumstances.

### **Quoracy**

The minimum quoracy for a meeting to conduct business is 67% (two thirds) of appointed members. If, at short notice, any DMC members cannot attend then the committee may still meet if at least 2 members including the Chair will be present. If the DMC is considering a major action after such a meeting the Chair should communicate with the absent members, including the CI, as soon after the meeting as possible to check they agree. If they do not, a further meeting should be arranged with the full DMC.

### **Non-attendance**

DMC members who will not be able to attend the meeting should pass comments to the committee Chair in advance for consideration during the discussion. If a member does not attend a meeting or provide comments when requested between meetings, it will be ensured that the member is available for the next meeting. If a member does not attend the next meeting or provide comments when next requested, they will be asked if they wish to remain part of the DMC. If an independent member does not attend a third meeting, strong consideration will be given to replacing this member.

## **7 Trial Documentation and Procedures to Ensure Confidentiality and Proper Communication**

To enhance the integrity and credibility of the trial, procedures will be implemented to ensure the DMC has sole access to evolving information from the clinical trial regarding comparative results of efficacy and safety data, aggregated by treatment arm. An exception will be made to permit access to an unblinded statistician who will be responsible for creating the closed report and sending it to the DMC. The Chief Investigator will provide the chair of the DMC with information on any serious unexpected adverse reactions to the study drug, and will also be responsible for satisfying the standard requirements for reporting of relevant events to the regulatory authorities.

### **Meeting Content and Reports**



At the first DMC meeting, the committee will provide an advisory review of scientific and ethical issues relating to study design and conduct, discuss the functioning of the DMC and discuss the format and content of the Open and Closed Reports that will be used to present trial results at subsequent DMC meetings.

The following intended content may be included in the reports:

- *Intended content of material to be available in open sessions.*  
Open Reports, available to all who attend the DMC meeting, will include any major protocol changes, data on recruitment and baseline characteristics; pooled data on eligibility violations; completeness of follow-up and compliance. The unblinded statistician will prepare these Open Reports.
- *Intended content of material to be available in closed sessions.*  
Closed Reports, available only to those attending the Closed Sessions of the DMC meeting, will include analyses of primary and secondary efficacy endpoints with due allowance for this being a feasibility study; analyses of adverse events and symptom severity; and Open Report analyses that are displayed by intervention group. The unblinded statistician, who is not involved in any decisions relating to the trial, will prepare these Closed Reports for the DMC.

For each DMC meeting, Open and Closed Reports will be provided to DMC members approximately two weeks prior to the date of the meeting by the unblinded trial statistician. The Open and Closed Reports should provide information that is as accurate as possible at the time of preparation, with follow-up that is as complete as possible.

### **External evidence**

Identification and circulation of published external evidence (e.g. from other trials/ systematic reviews) is a responsibility of the CI. The DMC should continue to be made aware of other data that may impact on the trial.

### **Communication**

The facilitator will be responsible for the organisation of meetings and should be copied into relevant communications with and between the DMC.

### **Confidentiality**

DMC members are expected to store securely copies of the DMC reports, agenda and minutes, as well as copies of communications between meetings. All documentation should be considered confidential.

## **8 Decision Making**

### **TSC / DMC decision-making**

To be quorate for decision-making, at least two members (two thirds of the appointed membership) including the Chair will be present. It is important that the implications



(e.g. ethical, statistical, practical, and financial) for the trial be considered before any decision is made.

The DMC is jointly responsible with the TSC for safeguarding the interests of participating patients and for the conduct of the trial. Recommendations to amend the protocol or conduct of the study made by the DMC will be considered and accepted or rejected by the TSC. The TSC will be responsible for deciding whether to continue or to stop the trial based on the DMC recommendations.

DMC recommendations include but are not limited to:

- Trial continues as planned
- Early termination of the trial
- Stopping recruitment within a subgroup
- Extending recruitment or extending follow-up (pending approval by the funder)
- Proposing protocol changes

There are no pre-specified stopping rules in this feasibility trial. Should the DMC decide to recommend early termination of the trial, a full vote of the DMC will be required. In the event of a split vote, the decision will go with the majority vote, but a report should be provided to the TSC, written anonymously by the DMC members who are in the minority, for the purposes of officially stating their position on the issue. This report should not include unblinded data unless deemed necessary by the DMC. This information should be forwarded to the trial chief investigator as rapidly as possible.

### **Consensus and quoracy**

Every effort should be made to achieve consensus. The role of the Chair is to summarise discussions and encourage consensus; therefore, it is usually best for the Chair to give their own opinion last. If a vote is required to achieve consensus, all independent members of the DMC have the opportunity to cast a vote with the chair voting last. The CI is not able to cast a vote.

## **9 Reporting**

### **Meeting Minutes**

Two sets of minutes will be prepared: the Open Session Minutes and the Closed Session Minutes.

Minutes of the open session will be prepared by the facilitator on behalf of the CI within two weeks of the meeting, and uploaded to the NIHR MIS when approved. Copies of minutes will be sent to all members, the sponsor and the funder, and a copy will be retained in the Trial Master File. These minutes and actions will be used as a basis for the following DMC meeting agenda.

The method of recording the outcome of the Closed session of the DMC will be at the discretion of the DMC Chair, and will be the responsibility of the DMC members to ensure confidentiality. Minutes of the closed session will be prepared within two weeks of the meeting. Any minutes of record of the Closed session of the DMC



should not be circulated out with the DMC members. Copies will be kept by the DMC chair or other designated DMC member. These will be sent to the trial manager and archived at the time of study closure.

### **Recommendations**

Within two weeks of the meeting, the DMC chair/other designated DMC member will report via email to the Trial Manager their recommendations/decisions. The trial manager will forward the DMC meeting report and recommendations to the CI, TSC and the trial management group.

### **Disagreements**

If there is a serious disagreement between the DMC and the TSC a meeting of these groups should be held. The information to be shown would depend upon the action proposed and the DMC's concerns. Depending on the reason for the disagreement some confidential data might have to be revealed to all those attending such a meeting. The meeting could be chaired by an external expert who is not directly involved with the trial.

## **10 After the Trial**

- Publication of results
- The information about the DMC that will be included in published trial reports
- Whether the DMC will have the opportunity to approve publications, especially with respect to reporting of any DMC recommendation regarding termination of a trial
- Any constraints on DMC members divulging information about their deliberations after the trial has been published

### **Publication of results**

DMC members will have the opportunity to read and comment on the proposed main publications of trial data prior to submission and abstracts and presentations during the trial, especially with respect to reporting of any DMC recommendation regarding termination of a trial.

This review may be concurrent to that of the trial investigators and TSC. DMC members will be named and their affiliations listed in the main report, unless they explicitly request otherwise.

### **Confidentiality of results**

Unless permission has been agreed with the TSC, individual members will not discuss confidential information to which they have become party as a result of their involvement in the trial until 12 months after the primary trial results have been published.

## Appendix 1: Agreement and Competing interests form for DMC members

Please complete the following document and return to the DMC Facilitator.

|                          |                                                                          |
|--------------------------|--------------------------------------------------------------------------|
| <input type="checkbox"/> | I have read and understood the CARE Trial DMC Charter V2.0               |
| <input type="checkbox"/> | I agree to join the Data Monitoring Committee for this trial             |
| <input type="checkbox"/> | I agree to treat all sensitive trial data and discussions confidentially |

The avoidance of any perception that members of a DMC may be biased in some fashion is important for the credibility of the decisions made by the DMC and for the integrity of the trial. Possible competing interest should be disclosed via the trial office. In many cases simple disclosure up front should be sufficient. Otherwise, the (potential) DMC member should remove the conflict or stop participating in the DMC.

Table 1 lists potential competing interests.

|                          |                                                                          |
|--------------------------|--------------------------------------------------------------------------|
| <input type="checkbox"/> | <b>No</b> , I have no competing interests to declare                     |
| <input type="checkbox"/> | <b>Yes</b> , I have competing interests to declare (please detail below) |

Please provide details of any competing interests:

Name: \_\_\_\_\_

Signature: \_\_\_\_\_ Date: \_\_\_\_\_

### Table 1

- Stock ownership in any commercial companies involved
- Stock transaction in any commercial company involved (if previously holding stock)
- Consulting arrangements with the sponsor
- Frequent speaking engagements on behalf of the intervention
- Career tied up in a product or technique assessed by trial
- Hands-on participation in the trial
- Involvement in the running of the trial
- Emotional involvement in the trial
- Intellectual conflict eg strong prior belief in the trial's experimental arm
- Involvement in regulatory issues relevant to the trial procedures
- Investment (financial or intellectual) in competing products
- Involvement in the publication

# Reporting checklist for protocol of a clinical trial.

Based on the SPIRIT guidelines.

## Instructions to authors

Complete this checklist by entering the page numbers from your manuscript where readers will find each of the items listed below.

Your article may not currently address all the items on the checklist. Please modify your text to include the missing information. If you are certain that an item does not apply, please write "n/a" and provide a short explanation.

Upload your completed checklist as an extra file when you submit to a journal.

In your methods section, say that you used the SPIRIT reporting guidelines, and cite them as:

Chan A-W, Tetzlaff JM, Gøtzsche PC, Altman DG, Mann H, Berlin J, Dickersin K, Hróbjartsson A, Schulz KF, Parulekar WR, Krleža-Jerić K, Laupacis A, Moher D. SPIRIT 2013 Explanation and Elaboration: Guidance for protocols of clinical trials. *BMJ*. 2013;346:e7586

|                                             | Reporting Item                                                                                                                  | Page Number |
|---------------------------------------------|---------------------------------------------------------------------------------------------------------------------------------|-------------|
| <b>Administrative information</b>           |                                                                                                                                 |             |
| Title                                       | <a href="#">#1</a> Descriptive title identifying the study design, population, interventions, and, if applicable, trial acronym | 1           |
| Trial registration                          | <a href="#">#2a</a> Trial identifier and registry name. If not yet registered, name of intended registry                        | 1           |
| Trial registration: data set                | <a href="#">#2b</a> All items from the World Health Organization Trial Registration Data Set                                    | 1           |
| Protocol version                            | <a href="#">#3</a> Date and version identifier                                                                                  | 1           |
| Funding                                     | <a href="#">#4</a> Sources and types of financial, material, and other support                                                  | 24          |
| Roles and responsibilities: contributorship | <a href="#">#5a</a> Names, affiliations, and roles of protocol contributors                                                     | 24          |
| Roles and                                   | <a href="#">#5b</a> Name and contact information for the trial sponsor                                                          | 1           |

responsibilities:

1 sponsor contact  
2 information

3  
4  
5 Roles and [#5c](#) Role of study sponsor and funders, if any, in study design; 24  
6 responsibilities: collection, management, analysis, and interpretation of data;  
7 sponsor and funder writing of the report; and the decision to submit the report for  
8 publication, including whether they will have ultimate  
9 authority over any of these activities  
10  
11  
12

13  
14 Roles and [#5d](#) Composition, roles, and responsibilities of the coordinating 24 and  
15 responsibilities: centre, steering committee, endpoint adjudication committee, supplementary  
16 committees data management team, and other individuals or groups  
17 overseeing the trial, if applicable (see Item 21a for data  
18 monitoring committee)  
19  
20  
21

## 22 Introduction

23  
24 Background and [#6a](#) Description of research question and justification for 7  
25 rationale undertaking the trial, including summary of relevant studies  
26 (published and unpublished) examining benefits and harms  
27 for each intervention  
28  
29  
30

31 Background and [#6b](#) Explanation for choice of comparators 7  
32 rationale: choice of  
33 comparators  
34  
35

36 Objectives [#7](#) Specific objectives or hypotheses 7  
37  
38

39 Trial design [#8](#) Description of trial design including type of trial (eg, parallel 7  
40 group, crossover, factorial, single group), allocation ratio, and  
41 framework (eg, superiority, equivalence, non-inferiority,  
42 exploratory)  
43  
44  
45

## 46 Methods:

### 47 Participants, 48 interventions, and 49 outcomes

50  
51  
52 Study setting [#9](#) Description of study settings (eg, community clinic, academic 7-8  
53 hospital) and list of countries where data will be collected.  
54 Reference to where list of study sites can be obtained  
55  
56  
57

58 Eligibility criteria [#10](#) Inclusion and exclusion criteria for participants. If applicable, 8-9  
59  
60

|    |                      |                                                                                   |       |
|----|----------------------|-----------------------------------------------------------------------------------|-------|
| 1  |                      | eligibility criteria for study centres and individuals who will                   |       |
| 2  |                      | perform the interventions (eg, surgeons, psychotherapists)                        |       |
| 3  |                      |                                                                                   |       |
| 4  | Interventions:       | <a href="#">#11a</a> Interventions for each group with sufficient detail to allow | 9-10  |
| 5  | description          | replication, including how and when they will be                                  |       |
| 6  |                      | administered                                                                      |       |
| 7  |                      |                                                                                   |       |
| 8  |                      |                                                                                   |       |
| 9  | Interventions:       | <a href="#">#11b</a> Criteria for discontinuing or modifying allocated            | 9-10  |
| 10 | modifications        | interventions for a given trial participant (eg, drug dose                        |       |
| 11 |                      | change in response to harms, participant request, or                              |       |
| 12 |                      | improving / worsening disease)                                                    |       |
| 13 |                      |                                                                                   |       |
| 14 |                      |                                                                                   |       |
| 15 |                      |                                                                                   |       |
| 16 | Interventions:       | <a href="#">#11c</a> Strategies to improve adherence to intervention protocols,   | 9-10  |
| 17 | adherence            | and any procedures for monitoring adherence (eg, drug tablet                      |       |
| 18 |                      | return; laboratory tests)                                                         |       |
| 19 |                      |                                                                                   |       |
| 20 |                      |                                                                                   |       |
| 21 | Interventions:       | <a href="#">#11d</a> Relevant concomitant care and interventions that are         | 10    |
| 22 | concomitant care     | permitted or prohibited during the trial                                          |       |
| 23 |                      |                                                                                   |       |
| 24 |                      |                                                                                   |       |
| 25 | Outcomes             | <a href="#">#12</a> Primary, secondary, and other outcomes, including the         | 11-12 |
| 26 |                      | specific measurement variable (eg, systolic blood pressure),                      |       |
| 27 |                      | analysis metric (eg, change from baseline, final value, time to                   |       |
| 28 |                      | event), method of aggregation (eg, median, proportion), and                       |       |
| 29 |                      | time point for each outcome. Explanation of the clinical                          |       |
| 30 |                      | relevance of chosen efficacy and harm outcomes is strongly                        |       |
| 31 |                      | recommended                                                                       |       |
| 32 |                      |                                                                                   |       |
| 33 |                      |                                                                                   |       |
| 34 |                      |                                                                                   |       |
| 35 |                      |                                                                                   |       |
| 36 | Participant timeline | <a href="#">#13</a> Time schedule of enrolment, interventions (including any      | 13-15 |
| 37 |                      | run-ins and washouts), assessments, and visits for                                |       |
| 38 |                      | participants. A schematic diagram is highly recommended                           |       |
| 39 |                      | (see Figure)                                                                      |       |
| 40 |                      |                                                                                   |       |
| 41 |                      |                                                                                   |       |
| 42 |                      |                                                                                   |       |
| 43 | Sample size          | <a href="#">#14</a> Estimated number of participants needed to achieve study      | 16    |
| 44 |                      | objectives and how it was determined, including clinical and                      |       |
| 45 |                      | statistical assumptions supporting any sample size                                |       |
| 46 |                      | calculations                                                                      |       |
| 47 |                      |                                                                                   |       |
| 48 |                      |                                                                                   |       |
| 49 |                      |                                                                                   |       |
| 50 | Recruitment          | <a href="#">#15</a> Strategies for achieving adequate participant enrolment to    | 16-17 |
| 51 |                      | reach target sample size                                                          |       |
| 52 |                      |                                                                                   |       |
| 53 |                      |                                                                                   |       |

**Methods:**  
**Assignment of**  
**interventions (for**  
**controlled trials)**



|    |                        |                      |                                                                 |       |
|----|------------------------|----------------------|-----------------------------------------------------------------|-------|
| 1  | Allocation: sequence   | <a href="#">#16a</a> | Method of generating the allocation sequence (eg, computer-     | 17    |
| 2  | generation             |                      | generated random numbers), and list of any factors for          |       |
| 3  |                        |                      | stratification. To reduce predictability of a random sequence,  |       |
| 4  |                        |                      | details of any planned restriction (eg, blocking) should be     |       |
| 5  |                        |                      | provided in a separate document that is unavailable to those    |       |
| 6  |                        |                      | who enrol participants or assign interventions                  |       |
| 7  |                        |                      |                                                                 |       |
| 8  |                        |                      |                                                                 |       |
| 9  |                        |                      |                                                                 |       |
| 10 | Allocation             | <a href="#">#16b</a> | Mechanism of implementing the allocation sequence (eg,          | 17    |
| 11 | concealment            |                      | central telephone; sequentially numbered, opaque, sealed        |       |
| 12 | mechanism              |                      | envelopes), describing any steps to conceal the sequence until  |       |
| 13 |                        |                      | interventions are assigned                                      |       |
| 14 |                        |                      |                                                                 |       |
| 15 |                        |                      |                                                                 |       |
| 16 |                        |                      |                                                                 |       |
| 17 | Allocation:            | <a href="#">#16c</a> | Who will generate the allocation sequence, who will enrol       | 17    |
| 18 | implementation         |                      | participants, and who will assign participants to interventions |       |
| 19 |                        |                      |                                                                 |       |
| 20 |                        |                      |                                                                 |       |
| 21 | Blinding (masking)     | <a href="#">#17a</a> | Who will be blinded after assignment to interventions (eg,      | 17    |
| 22 |                        |                      | trial participants, care providers, outcome assessors, data     |       |
| 23 |                        |                      | analysts), and how                                              |       |
| 24 |                        |                      |                                                                 |       |
| 25 |                        |                      |                                                                 |       |
| 26 |                        |                      |                                                                 |       |
| 27 | Blinding (masking):    | <a href="#">#17b</a> | If blinded, circumstances under which unblinding is             | NA    |
| 28 | emergency unblinding   |                      | permissible, and procedure for revealing a participant's        |       |
| 29 |                        |                      | allocated intervention during the trial                         |       |
| 30 |                        |                      |                                                                 |       |
| 31 |                        |                      |                                                                 |       |
| 32 | <b>Methods: Data</b>   |                      |                                                                 |       |
| 33 | <b>collection,</b>     |                      |                                                                 |       |
| 34 | <b>management, and</b> |                      |                                                                 |       |
| 35 | <b>analysis</b>        |                      |                                                                 |       |
| 36 |                        |                      |                                                                 |       |
| 37 |                        |                      |                                                                 |       |
| 38 |                        |                      |                                                                 |       |
| 39 | Data collection plan   | <a href="#">#18a</a> | Plans for assessment and collection of outcome, baseline, and   | 17-18 |
| 40 |                        |                      | other trial data, including any related processes to promote    |       |
| 41 |                        |                      | data quality (eg, duplicate measurements, training of           |       |
| 42 |                        |                      | assessors) and a description of study instruments (eg,          |       |
| 43 |                        |                      | questionnaires, laboratory tests) along with their reliability  |       |
| 44 |                        |                      | and validity, if known. Reference to where data collection      |       |
| 45 |                        |                      | forms can be found, if not in the protocol                      |       |
| 46 |                        |                      |                                                                 |       |
| 47 |                        |                      |                                                                 |       |
| 48 |                        |                      |                                                                 |       |
| 49 |                        |                      |                                                                 |       |
| 50 | Data collection plan:  | <a href="#">#18b</a> | Plans to promote participant retention and complete follow-     | 18    |
| 51 | retention              |                      | up, including list of any outcome data to be collected for      |       |
| 52 |                        |                      | participants who discontinue or deviate from intervention       |       |
| 53 |                        |                      | protocols                                                       |       |
| 54 |                        |                      |                                                                 |       |
| 55 |                        |                      |                                                                 |       |
| 56 |                        |                      |                                                                 |       |
| 57 | Data management        | <a href="#">#19</a>  | Plans for data entry, coding, security, and storage, including  | 18-19 |
| 58 |                        |                      | any related processes to promote data quality (eg, double data  |       |
| 59 |                        |                      |                                                                 |       |
| 60 |                        |                      |                                                                 |       |

|    |                        |                                                                                   |            |
|----|------------------------|-----------------------------------------------------------------------------------|------------|
| 1  |                        | entry; range checks for data values). Reference to where                          |            |
| 2  |                        | details of data management procedures can be found, if not in                     |            |
| 3  |                        | the protocol                                                                      |            |
| 4  |                        |                                                                                   |            |
| 5  | Statistics: outcomes   | <a href="#">#20a</a> Statistical methods for analysing primary and secondary      | 19-21 and  |
| 6  |                        | outcomes. Reference to where other details of the statistical                     | supplement |
| 7  |                        | analysis plan can be found, if not in the protocol                                |            |
| 8  |                        |                                                                                   |            |
| 9  |                        |                                                                                   |            |
| 10 | Statistics: additional | <a href="#">#20b</a> Methods for any additional analyses (eg, subgroup and        | 19-21 and  |
| 11 | analyses               | adjusted analyses)                                                                | supplement |
| 12 |                        |                                                                                   |            |
| 13 |                        |                                                                                   |            |
| 14 | Statistics: analysis   | <a href="#">#20c</a> Definition of analysis population relating to protocol non-  | 19-21 and  |
| 15 | population and         | adherence (eg, as randomised analysis), and any statistical                       | supplement |
| 16 | missing data           | methods to handle missing data (eg, multiple imputation)                          |            |
| 17 |                        |                                                                                   |            |
| 18 |                        |                                                                                   |            |
| 19 |                        |                                                                                   |            |
| 20 | <b>Methods:</b>        |                                                                                   |            |
| 21 | <b>Monitoring</b>      |                                                                                   |            |
| 22 |                        |                                                                                   |            |
| 23 |                        |                                                                                   |            |
| 24 | Data monitoring:       | <a href="#">#21a</a> Composition of data monitoring committee (DMC); summary      | 21         |
| 25 | formal committee       | of its role and reporting structure; statement of whether it is                   |            |
| 26 |                        | independent from the sponsor and competing interests; and                         |            |
| 27 |                        | reference to where further details about its charter can be                       |            |
| 28 |                        | found, if not in the protocol. Alternatively, an explanation of                   |            |
| 29 |                        | why a DMC is not needed                                                           |            |
| 30 |                        |                                                                                   |            |
| 31 |                        |                                                                                   |            |
| 32 |                        |                                                                                   |            |
| 33 | Data monitoring:       | <a href="#">#21b</a> Description of any interim analyses and stopping guidelines, | 21         |
| 34 | interim analysis       | including who will have access to these interim results and                       |            |
| 35 |                        | make the final decision to terminate the trial                                    |            |
| 36 |                        |                                                                                   |            |
| 37 |                        |                                                                                   |            |
| 38 |                        |                                                                                   |            |
| 39 | Harms                  | <a href="#">#22</a> Plans for collecting, assessing, reporting, and managing      | 21-22      |
| 40 |                        | solicited and spontaneously reported adverse events and other                     |            |
| 41 |                        | unintended effects of trial interventions or trial conduct                        |            |
| 42 |                        |                                                                                   |            |
| 43 |                        |                                                                                   |            |
| 44 | Auditing               | <a href="#">#23</a> Frequency and procedures for auditing trial conduct, if any,  | 22         |
| 45 |                        | and whether the process will be independent from                                  |            |
| 46 |                        | investigators and the sponsor                                                     |            |
| 47 |                        |                                                                                   |            |
| 48 |                        |                                                                                   |            |
| 49 | <b>Ethics and</b>      |                                                                                   |            |
| 50 | <b>dissemination</b>   |                                                                                   |            |
| 51 |                        |                                                                                   |            |
| 52 |                        |                                                                                   |            |
| 53 | Research ethics        | <a href="#">#24</a> Plans for seeking research ethics committee / institutional   | 22-23      |
| 54 | approval               | review board (REC / IRB) approval                                                 |            |
| 55 |                        |                                                                                   |            |
| 56 |                        |                                                                                   |            |
| 57 | Protocol amendments    | <a href="#">#25</a> Plans for communicating important protocol modifications      | 23         |
| 58 |                        | (eg, changes to eligibility criteria, outcomes, analyses) to                      |            |
| 59 |                        |                                                                                   |            |
| 60 |                        |                                                                                   |            |

|    |                                             |                                                                                                                                                                                                                                                                                                          |                   |
|----|---------------------------------------------|----------------------------------------------------------------------------------------------------------------------------------------------------------------------------------------------------------------------------------------------------------------------------------------------------------|-------------------|
|    |                                             | relevant parties (eg, investigators, REC / IRBs, trial participants, trial registries, journals, regulators)                                                                                                                                                                                             |                   |
| 1  |                                             |                                                                                                                                                                                                                                                                                                          |                   |
| 2  |                                             |                                                                                                                                                                                                                                                                                                          |                   |
| 3  |                                             |                                                                                                                                                                                                                                                                                                          |                   |
| 4  | Consent or assent                           | <a href="#">#26a</a> Who will obtain informed consent or assent from potential trial participants or authorised surrogates, and how (see Item 32)                                                                                                                                                        | 16                |
| 5  |                                             |                                                                                                                                                                                                                                                                                                          |                   |
| 6  |                                             |                                                                                                                                                                                                                                                                                                          |                   |
| 7  |                                             |                                                                                                                                                                                                                                                                                                          |                   |
| 8  |                                             |                                                                                                                                                                                                                                                                                                          |                   |
| 9  | Consent or assent: ancillary studies        | <a href="#">#26b</a> Additional consent provisions for collection and use of participant data and biological specimens in ancillary studies, if applicable                                                                                                                                               | 16                |
| 10 |                                             |                                                                                                                                                                                                                                                                                                          |                   |
| 11 |                                             |                                                                                                                                                                                                                                                                                                          |                   |
| 12 |                                             |                                                                                                                                                                                                                                                                                                          |                   |
| 13 |                                             |                                                                                                                                                                                                                                                                                                          |                   |
| 14 | Confidentiality                             | <a href="#">#27</a> How personal information about potential and enrolled participants will be collected, shared, and maintained in order to protect confidentiality before, during, and after the trial                                                                                                 | 18-19             |
| 15 |                                             |                                                                                                                                                                                                                                                                                                          |                   |
| 16 |                                             |                                                                                                                                                                                                                                                                                                          |                   |
| 17 |                                             |                                                                                                                                                                                                                                                                                                          |                   |
| 18 |                                             |                                                                                                                                                                                                                                                                                                          |                   |
| 19 |                                             |                                                                                                                                                                                                                                                                                                          |                   |
| 20 | Declaration of interests                    | <a href="#">#28</a> Financial and other competing interests for principal investigators for the overall trial and each study site                                                                                                                                                                        | 24 and 25         |
| 21 |                                             |                                                                                                                                                                                                                                                                                                          |                   |
| 22 |                                             |                                                                                                                                                                                                                                                                                                          |                   |
| 23 |                                             |                                                                                                                                                                                                                                                                                                          |                   |
| 24 | Data access                                 | <a href="#">#29</a> Statement of who will have access to the final trial dataset, and disclosure of contractual agreements that limit such access for investigators                                                                                                                                      | 23                |
| 25 |                                             |                                                                                                                                                                                                                                                                                                          |                   |
| 26 |                                             |                                                                                                                                                                                                                                                                                                          |                   |
| 27 |                                             |                                                                                                                                                                                                                                                                                                          |                   |
| 28 |                                             |                                                                                                                                                                                                                                                                                                          |                   |
| 29 | Ancillary and post trial care               | <a href="#">#30</a> Provisions, if any, for ancillary and post-trial care, and for compensation to those who suffer harm from trial participation                                                                                                                                                        | 10                |
| 30 |                                             |                                                                                                                                                                                                                                                                                                          |                   |
| 31 |                                             |                                                                                                                                                                                                                                                                                                          |                   |
| 32 |                                             |                                                                                                                                                                                                                                                                                                          |                   |
| 33 |                                             |                                                                                                                                                                                                                                                                                                          |                   |
| 34 | Dissemination policy: trial results         | <a href="#">#31a</a> Plans for investigators and sponsor to communicate trial results to participants, healthcare professionals, the public, and other relevant groups (eg, via publication, reporting in results databases, or other data sharing arrangements), including any publication restrictions | 23                |
| 35 |                                             |                                                                                                                                                                                                                                                                                                          |                   |
| 36 |                                             |                                                                                                                                                                                                                                                                                                          |                   |
| 37 |                                             |                                                                                                                                                                                                                                                                                                          |                   |
| 38 |                                             |                                                                                                                                                                                                                                                                                                          |                   |
| 39 |                                             |                                                                                                                                                                                                                                                                                                          |                   |
| 40 |                                             |                                                                                                                                                                                                                                                                                                          |                   |
| 41 |                                             |                                                                                                                                                                                                                                                                                                          |                   |
| 42 |                                             |                                                                                                                                                                                                                                                                                                          |                   |
| 43 | Dissemination policy: authorship            | <a href="#">#31b</a> Authorship eligibility guidelines and any intended use of professional writers                                                                                                                                                                                                      | 23                |
| 44 |                                             |                                                                                                                                                                                                                                                                                                          |                   |
| 45 |                                             |                                                                                                                                                                                                                                                                                                          |                   |
| 46 |                                             |                                                                                                                                                                                                                                                                                                          |                   |
| 47 | Dissemination policy: reproducible research | <a href="#">#31c</a> Plans, if any, for granting public access to the full protocol, participant-level dataset, and statistical code                                                                                                                                                                     | 23                |
| 48 |                                             |                                                                                                                                                                                                                                                                                                          |                   |
| 49 |                                             |                                                                                                                                                                                                                                                                                                          |                   |
| 50 | <b>Appendices</b>                           |                                                                                                                                                                                                                                                                                                          |                   |
| 51 |                                             |                                                                                                                                                                                                                                                                                                          |                   |
| 52 |                                             |                                                                                                                                                                                                                                                                                                          |                   |
| 53 | Informed consent materials                  | <a href="#">#32</a> Model consent form and other related documentation given to participants and authorised surrogates                                                                                                                                                                                   | 16 and supplement |
| 54 |                                             |                                                                                                                                                                                                                                                                                                          |                   |
| 55 |                                             |                                                                                                                                                                                                                                                                                                          |                   |
| 56 |                                             |                                                                                                                                                                                                                                                                                                          |                   |
| 57 | Biological specimens                        | <a href="#">#33</a> Plans for collection, laboratory evaluation, and storage of biological specimens for genetic or molecular analysis in the                                                                                                                                                            | NA                |
| 58 |                                             |                                                                                                                                                                                                                                                                                                          |                   |
| 59 |                                             |                                                                                                                                                                                                                                                                                                          |                   |
| 60 |                                             |                                                                                                                                                                                                                                                                                                          |                   |

current trial and for future use in ancillary studies, if applicable

Notes:

- 5d: 24 and supplementary
- 20a: 19-21 and supplement
- 20b: 19-21 and supplement
- 20c: 19-21 and supplement
- 32: 16 and supplement The SPIRIT Explanation and Elaboration paper is distributed under the terms of the Creative Commons Attribution License CC-BY-NC. This checklist was completed on 16. April 2023 using <https://www.goodreports.org/>, a tool made by the [EQUATOR Network](#) in collaboration with [Penelope.ai](#)
